# Supplementary material for: Laminin α4 Expression in Human Adipose Tissue Depots and Its Association with Obesity and Obesity Related Traits
Source: Biomedicines. 2023 Oct 17;11(10):2806. doi: 10.3390/biomedicines11102806 (PMC10604865; doi:10.3390/biomedicines11102806)
Supplement: Supplementary file 1 [file biomedicines-11-02806-s001.zip › Suppl_Tables1-5.xlsx]

## Sheet: Suppl. Table S1
	SC				SC females				SC males				VIS				VIS females				VIS males
Clinical parameters	r	p	adj. p	n=1479	r	p	adj. p	n=1047	r	p	adj. p	n=432	r	p	adj. p	n=1479	r	p	adj. p	n=1047	r	p	adj. p	n=432
Adiponectin	0.1796	0.11087	0.27213	80	0.172	0.18496	0.4219	61	0.3807	0.10865	0.3667	19	0.09443	0.40474	0.64283	80	0.1263	0.3322	0.64067	61	-0.1193	0.62579	0.84481	19
Age	-0.06445	0.01317	0.071118	1479	-0.04747	0.12481	0.37442	1047	-0.09939	0.03894	0.21027	432	-0.0182	0.48442	0.68839	1479	-0.00384	0.90124	0.95703	1047	-0.04901	0.30951	0.64282	432
ALAT	0.02241	0.41158	0.64114	1345	0.003538	0.91356	0.96749	944	0.05755	0.25022	0.42224	401	-0.007606	0.78047	0.87803	1345	0.02602	0.42464	0.67443	944	-0.09261	0.063935	0.24661	401
ASAT	-0.01827	0.55781	0.71718	1032	-0.04027	0.28499	0.51376	707	0.03575	0.52068	0.66945	325	-0.009466	0.76132	0.87803	1032	0.03162	0.40118	0.67443	707	-0.1034	0.06254	0.24661	325
BMI	-0.001251	0.96166	0.99109	1479	-0.03177	0.30445	0.51376	1047	0.06112	0.20482	0.42224	432	-0.01447	0.57821	0.78059	1479	-0.01749	0.57197	0.73539	1047	-0.005627	0.90716	0.99324	432
Body fat	0.01278	0.7415	0.83419	669	-0.03218	0.4916	0.6986	459	0.1208	0.080706	0.31129	210	0.1342	0.00050177	0.013548	669	0.1632	0.0004482	0.012101	459	0.08701	0.20919	0.47068	210
Body weight	0.02847	0.27896	0.47075	1448	-0.00901	0.77348	0.87912	1023	0.1162	0.016536	0.11162	425	-0.009472	0.71876	0.87803	1448	-0.01833	0.55816	0.73539	1023	0.005443	0.91091	0.99324	425
Cholesterol	0.05251	0.10044	0.27119	980	0.05012	0.18751	0.4219	693	0.07715	0.1925	0.42224	287	-0.0365	0.2536	0.48908	980	0.0004226	0.99114	0.99114	693	-0.1152	0.051305	0.24661	287
Creatinine	-0.05223	0.047198	0.15929	1444	-0.05059	0.10637	0.35901	1020	-0.05714	0.24035	0.42224	424	-0.04787	0.069008	0.21064	1444	-0.03792	0.2263	0.55546	1020	-0.08693	0.073756	0.24893	424
CrP	-0.07486	0.0045481	0.048006	1435	-0.09732	0.0019188	0.051808	1014	-0.01923	0.69402	0.85176	421	-0.03952	0.13452	0.33018	1435	-0.05346	0.088874	0.39993	1014	0.0004143	0.99324	0.99324	421
Erythrocytes	0.007387	0.79199	0.85535	1277	0.01884	0.57343	0.73727	895	-0.01586	0.75731	0.88902	382	0.06979	0.012606	0.17018	1277	0.08794	0.0084778	0.11445	895	0.03625	0.47998	0.76233	382
FPG	-0.09023	0.0010007	0.027019	1327	-0.06884	0.035408	0.239	934	-0.133	0.008286	0.074574	393	-0.03758	0.17125	0.38532	1327	-0.02105	0.52055	0.73539	934	-0.07506	0.13744	0.35088	393
FPI	0.01558	0.73949	0.83419	458	-0.004947	0.93165	0.96749	303	0.05807	0.47295	0.63848	155	0.0004277	0.99272	0.99272	458	0.0162	0.77887	0.91433	303	0.003893	0.96166	0.99324	155
HbA1c	-0.08069	0.023332	0.10499	790	-0.03634	0.39069	0.62051	560	-0.1749	0.0078364	0.074574	230	-0.06821	0.055308	0.21064	790	-0.07678	0.069436	0.39993	560	-0.04238	0.52245	0.78367	230
HDL-Cholesterol	0.04901	0.13719	0.28788	921	0.0744	0.059155	0.2662	644	-0.007106	0.90628	0.96314	277	-0.02763	0.40229	0.64283	921	-0.04236	0.28306	0.58789	644	-0.01787	0.76717	0.98636	277
Height	0.0322	0.22089	0.39759	1447	0.01261	0.6873	0.8435	1021	0.1396	0.003895	0.074574	426	0.01976	0.45259	0.67888	1447	0.01219	0.6972	0.85565	1021	0.04111	0.39735	0.67052	426
Hip	-0.2236	0.012918	0.071118	123	-0.1928	0.070259	0.271	89	-0.3171	0.067667	0.3045	34	0.1689	0.061764	0.21064	123	0.1631	0.12667	0.42751	89	0.1516	0.3921	0.67052	34
HOMA-IR	-0.02951	0.5484	0.71718	416	-0.03656	0.54388	0.73424	278	-0.01683	0.84463	0.95021	138	0.02433	0.6208	0.79817	416	0.03733	0.53533	0.73539	278	0.04836	0.57327	0.81465	138
IL-6	-0.08284	0.5292	0.71718	60	-0.04469	0.78144	0.87912	41	-0.2431	0.31595	0.5018	19	0.243	0.06133	0.21064	60	0.03389	0.8334	0.93758	41	0.6573	0.0022275	0.060141	19
LDL-Cholesterol	0.07361	0.031091	0.11992	858	0.07966	0.05154	0.2662	598	0.09484	0.12717	0.38072	260	0.003048	0.92895	0.96468	858	0.05695	0.16428	0.48857	598	-0.1188	0.055682	0.24661	260
Leptin	0.01875	0.66854	0.82049	524	0.07	0.17499	0.4219	377	-0.06054	0.46592	0.63848	147	0.00998	0.81971	0.88529	524	0.05908	0.25246	0.56803	377	-0.1214	0.14295	0.35088	147
Leucocytes	-0.07331	0.005334	0.048006	1443	-0.07188	0.02182	0.19638	1018	-0.07152	0.14101	0.38072	425	-0.05358	0.041853	0.21064	1443	-0.05596	0.074317	0.39993	1018	-0.04223	0.38516	0.67052	425
NEFA	-0.2269	0.13861	0.28788	44	-0.1903	0.28891	0.51376	33	-0.2636	0.43452	0.63848	11	0.2584	0.090357	0.24396	44	0.373	0.03253	0.29277	33	0.03636	0.92443	0.99324	11
Thrombocytes	-0.05148	0.066435	0.1993	1272	-0.08023	0.0166	0.19638	891	0.002078	0.96775	0.96775	381	-0.03527	0.20876	0.43357	1272	-0.05397	0.10745	0.41444	891	0.001927	0.9701	0.99324	381
Triglycerides	0.0003558	0.99109	0.99109	988	0.02646	0.48498	0.6986	699	-0.06921	0.24086	0.42224	289	-0.05763	0.070215	0.21064	988	-0.03266	0.38852	0.67443	699	-0.1215	0.038925	0.24661	289
Waist	-0.05103	0.42743	0.64114	244	-0.002834	0.9703	0.9703	175	-0.1579	0.19503	0.42224	69	0.1358	0.034037	0.21064	244	0.1016	0.18095	0.48857	175	0.3108	0.0093417	0.12611	69
WHR	-0.1292	0.16513	0.31846	117	-0.116	0.2964	0.51376	83	-0.01622	0.92747	0.96314	34	0.09337	0.31669	0.57005	117	0.01097	0.92158	0.95703	83	0.2705	0.12179	0.35088	34

## Sheet: Suppl. Table S2
Tissue	ID	Set size	Enrichment Score	Normalized enrichment score	p	Adj. p	Core enrichment
SC	GOBP_SENSORY_PERCEPTION_OF_SMELL	431	-0.408253	-2.57328	0.000559597	0.00887008	OR7C1/OR2A5/OR1I1/OR2M4/OR2G6/OR10H5/SLC24A4/OR4D9/OR2V2/OR8D4/OR7D2/OR3A3/OR2AG1/OR7G2/OR1M1/OR8A1/OR2AG2/OR6J1/OR10G3/OR7A17/OR2B11/OR6C4/OR4F15/OR7D4/OR10H1/OR5AU1/OR51E2/OR2AT4/OR6Y1/OR4K13/OR8H1/OR4D1/OR10A2/OR10J1/OR2T33/OR8B8/OR2A12/OR2J2/OR6K3/OR52I1/OR6C75/OR1A1/OR10A3/CNGB1/OR51D1/OR10AC1/OR51L1/OR6C6/TTC8/OR10G4/OR56A4/OR2I1P/OR10K2/OR4K17/OR8H2/OR3A2/OR4E2/OR11A1/OR2T12/CFAP69/OR4P4/O…
SC	GOBP_REGULATION_OF_MEMBRANE_POTENTIAL	410	-0.248836	-1.56006	0.000564016	0.00887008	SCN3B/AKAP6/GABRB3/BVES/OPRM1/PTPN3/HTR3B/SLC24A4/ABCB5/DLG1/OPRD1/SLC4A8/CHRNA7/KCNK6/GABRD/ABAT/GABRG3/GJC1/ATP1A4/GRIK2/ANK3/CHRNB4/CHRNG/KCNH1/NALCN/CHRNA5/SCN8A/SCN1A/SCN7A/GABRR2/DLG4/HSH2D/GABRG2/SCN1B/CNR2/CNTNAP1/FGF13/NUP155/KCNJ3/KCNMB4/RIMS2/SCN11A/CACNB3/KCNE1/BCO2/P2RX7/KCNH6/CNGB1/KCNK3/KCNC1/HCN1/TMEM108/P2RX3/CXADR/CACNB2/SLMAP/GLRA1/KCNK10/RELN/TRPV1/KCNC2/RNF207/SCN2B/GABRA1/KC…
SC	GOBP_POTASSIUM_ION_TRANSPORT	237	-0.301555	-1.78082	0.000603136	0.00887008	AKAP6/SLC9A7/KCNJ6/KCNMB1/NOS1/KCNC4/KCNN3/SLC24A4/SLC12A8/SLC24A1/DLG1/KCNJ14/KCNK6/ATP1A4/ANK3/KCNH1/NALCN/KCNG4/SLC12A9/ATP1B4/KCNJ3/KCNMB4/SLC24A2/KCNJ16/KCNJ15/KCNE1/WNK3/KCNAB3/ALG10B/KCNH6/OPRK1/NETO2/KCNK3/KCNC1/HCN1/ABCC8/SLC12A3/KCNK10/KCNC2/KCNA7/RNF207/DPP6/KCNJ5/ATP1B2/ATP1A3/KCNG1/WNK4/KCNJ10/KCNJ11/KCNN1/TSC1/SLC12A5/SLC9A4/KCNMA1/HTR2A/KCNIP3/KEL/SLC12A1/CACNA1D/KCNRG/KCNV1/KCNJ12…
SC	GOBP_SODIUM_ION_TRANSPORT	245	-0.294154	-1.74035	0.000605694	0.00887008	SCN3B/CNKSR3/SLC9A7/SLC4A5/NOS1/PTPN3/SLC24A4/SLC24A1/DLG1/SLC4A8/HECW2/SLC6A4/HECW1/SLC6A14/ATP1A4/ANK3/NALCN/SLC13A5/SCN8A/SLC6A1/SCN1A/SCN7A/SCN1B/SLC38A1/ATP1B4/FGF13/SLC13A4/SCN11A/SLC24A2/ASIC4/WNK3/SLC6A11/SCNN1G/P2RX7/SLC9B1/SLC34A2/NETO2/SLC13A3/HCN1/SLMAP/PRSS8/SLC5A5/SLC12A3/SCN2B/CNTN1/SLC6A20/TRPM4/ATP1B2/ATP1A3/WNK4/SCNN1A/SERPINE2/SLC9A4/SLC22A5/PKP2/SLC12A1/SPTBN4/SLC5A4/SLC8A1/CA…
SC	GOBP_SENSORY_PERCEPTION_OF_LIGHT_STIMULUS	219	-0.2932	-1.71128	0.000606428	0.00887008	PDE6A/ADGRV1/MYO3B/SLC24A1/LRAT/RGS9/OPA3/EYS/GJC1/CABP4/IMPG2/GABRR2/CEP250/CDH3/RP1/LCTL/RGR/PPEF2/CRX/GRM6/SLC24A2/RD3/SEMA5B/PDE6B/AIPL1/CNGB1/EML2/RORB/VSX1/TRPM1/GUCA1B/CABP1/CACNB2/GLRA1/CLRN1/RPGRIP1/RAX2/PAX6/FAM161A/KCNJ10/RP1L1/RDH8/BEST1/GRK7/CACNA1F/ABCA4/LAMC3/NXNL2/CLN8/CLDN19/RIMS1/CYP4V2/CLN6/CNGA3/RPGR/CPLX4/USH1G/TYR/CRB1/EYA3/RP2/RHO/NR2E3/VSX2/RS1/RCVRN/GJA10/TULP2/POU6F2/OPN…
SC	GOBP_SODIUM_ION_TRANSMEMBRANE_TRANSPORT	174	-0.324742	-1.8342	0.000618047	0.00887008	SCN3B/CNKSR3/SLC9A7/SLC4A5/NOS1/PTPN3/SLC24A4/SLC24A1/DLG1/SLC4A8/HECW2/SLC6A4/HECW1/SLC6A14/ATP1A4/ANK3/NALCN/SCN8A/SLC6A1/SCN1A/SCN7A/SCN1B/FGF13/SCN11A/SLC24A2/ASIC4/WNK3/SLC6A11/SCNN1G/SLC9B1/SLC34A2/NETO2/HCN1/SLMAP/SLC12A3/SCN2B/SLC6A20/TRPM4/ATP1B2/ATP1A3/WNK4/SCNN1A/SLC9A4/SLC12A1/SLC8A1/CACNA1G/WNK2/SLC6A17/KLHL24/SLC6A12/PKD2L1/SCN5A/SLC5A10/SLC23A1/SLC5A1/ATP12A/SLC6A3/HCN3/FXYD2/DRD3/…
SC	GOBP_CILIUM_MOVEMENT	166	-0.310831	-1.74811	0.000619195	0.00887008	INPP5B/SLC26A8/SPEF2/CATSPER2/CFAP221/ATP1A4/DNAAF1/DNAH7/DNAH9/KLC3/CCR6/SLC9B1/HYDIN/CCDC40/EPPIN/CFAP69/DAW1/CFAP54/CFAP52/CFAP157/TCTE1/TTLL6/TTLL9/PRDM14/CFAP206/DNAH17/CFAP65/DRC7/PRSS55/CABYR/IQCF1/SORD/ADCY10/DZIP1/IQCG/CELF3/DNHD1/DNAH11/DNAH5/NEK10/TEKT1/EFCAB1/NEURL1/SLC22A14/TAC4/TEKT2/CATSPERD/DNAI2/ROPN1/RSPH6A/SPA17/NPHP4/ENO4/CATSPER4/QRICH2/CCDC63/CFAP61/CELSR2/TEX101/DNAI1/TBC1D…
SC	GOBP_DETECTION_OF_ABIOTIC_STIMULUS	137	-0.36662	-1.99618	0.000632511	0.00887008	TMC2/ADGRV1/SLC24A4/PKD1L1/TRPM8/EYS/GRIK2/CABP4/SCN1A/TRPM3/CEP250/SAG/RP1/RGR/GRM6/SLC24A2/PKD2L2/ITGA2/LHFPL5/STRC/SEMA5B/PDE6B/AIPL1/CNGB1/PDZD7/GRK4/PKD1L2/TRPV1/NTRK1/BEST1/GRK7/SERPINE2/TMC1/CACNA1F/ABCA4/HTR2A/PKD1L3/CRB1/CHRNA10/PKD2L1/PITPNM1/TRPC3/RHO/PIEZO2/NR2E3/PHF24/EPHB1/RS1/RCVRN/GJA10/HPN/OPN5/GNAT1/OPN1SW/OTOP1/TULP1/WHRN/PTK2/OPN4/NOX3/GRK1/NPFFR2/DRGX/GUCY2D/CCDC66/NTSR1/PDE6…
SC	GOBP_REGULATION_OF_POSTSYNAPTIC_MEMBRANE_POTENTIAL	128	-0.408769	-2.19806	0.00064433	0.00887008	OPRM1/CHRNA7/GABRD/ABAT/GABRG3/GRIK2/CHRNB4/CHRNG/CHRNA5/GABRR2/DLG4/GABRG2/RIMS2/P2RX7/TMEM108/P2RX3/GLRA1/RELN/TRPV1/GABRA1/GRIK4/MAPK8IP2/PRKCZ/STX1B/GRIK3/GLRA3/WNT7A/CHRNA1/RIMS1/IGSF11/CHRNA3/GABRR1/GRM1/NLGN3/CHRNA2/GSK3A/SEZ6/CHRNA10/P2RX4/CHRNA6/DRD2/CHRND/CUX2/P2RX5/MPP2/CELF4/TMEM25/SHANK1/GRIN2A/CHRNB1/NRXN1/CHRNB2/GRIN2C/GRIK5/GRIA1/GRID1/NPAS4/GABRB1/GRIA3/SLC8A3/GABRA3/GRM5/STX1A/G…
SC	GOBP_INORGANIC_ION_IMPORT_ACROSS_PLASMA_MEMBRANE	105	-0.359126	-1.85987	0.000665336	0.00887008	SLC9A7/KCNJ6/SLC24A4/SLC12A8/SLC24A1/DLG1/KCNJ14/ATP1A4/SLC6A1/SLC12A9/KCNJ3/SLC24A2/KCNJ16/KCNJ15/WNK3/SCNN1G/TRPV3/SLC12A3/TRPV1/KCNJ5/TRPM4/ATP1B2/ATP1A3/HFE/WNK4/KCNJ10/SCNN1A/KCNJ11/SLC12A5/SLC9A4/TRPV6/SLC12A1/CNGA3/SLC8A1/KCNJ12/WNK2/KCNK5/SLC39A5/SLC12A6/SLC5A1/ATP12A/TRPV4/FXYD2/SLC34A1/SLC6A9/SLC9A5/TRPV5/SLC9A2/ATP4A/SLC8A3/SLC39A12/HCN4/KCNH2/SLC8A2/KCNJ9/KCNK9
SC	GOBP_MICROTUBULE_BUNDLE_FORMATION	103	-0.344259	-1.77445	0.000669344	0.00887008	SPAST/DNAL1/SPEF2/LRRC49/DNAAF1/DNAH7/DCX/RP1/TTC26/CC2D2A/DNAH2/CFAP74/HYDIN/TRIM46/CCDC40/CFAP69/DAW1/CFAP157/CLIP1/TTLL6/RP1L1/CFAP206/DNAJB13/DNAH17/PLK1/CFAP65/DRC7/PRC1/MARK4/IQCG/DNAH5/RSPH1/DNAH8/NEURL1/TEKT2/DNAI2/RSPH6A/LRGUK/CCDC63/DNAI1/MTCL1/TBC1D21/DRC1/CFAP46/CFAP100/CCDC65/PLA2G3/CCDC39/CCDC66/TPPP2/ZMYND10/DNAH1
SC	GOBP_CHEMICAL_SYNAPTIC_TRANSMISSION_POSTSYNAPTIC	98	-0.373079	-1.90157	0.000670691	0.00887008	OPRM1/CHRNA7/ABAT/GRIK2/CHRNB4/CHRNG/CHRNA5/DLG4/RIMS2/P2RX7/TMEM108/P2RX3/GLRA1/RELN/TRPV1/MAPK8IP2/PRKCZ/STX1B/GLRA3/WNT7A/CHRNA1/RIMS1/IGSF11/CHRNA3/NLGN3/CHRNA2/GSK3A/SEZ6/CHRNA10/P2RX4/CHRNA6/DRD2/CHRND/CUX2/P2RX5/MPP2/CELF4/TMEM25/SHANK1/GRIN2A/CHRNB1/NRXN1/CHRNB2/GRIN2C/GRIK5/NPAS4/SLC8A3/STX1A/SLC8A2/CHRNA4/NTSR1/CHRNA9/GRIN2B/GLRA2/CHRNB3/ADORA1/MECP2
SC	GOBP_AXONEME_ASSEMBLY	71	-0.442219	-2.12218	0.000692521	0.00887008	DNAL1/SPEF2/LRRC49/DNAAF1/DNAH7/DCX/RP1/TTC26/CC2D2A/DNAH2/CFAP74/HYDIN/CCDC40/CFAP69/DAW1/CFAP157/RP1L1/CFAP206/DNAJB13/DNAH17/CFAP65/DRC7/IQCG/DNAH5/RSPH1/DNAH8/NEURL1/TEKT2/DNAI2/RSPH6A/LRGUK/CCDC63/DNAI1/TBC1D21/DRC1/CFAP46/CFAP100/CCDC65/PLA2G3/CCDC39/ZMYND10/DNAH1/CFAP43/CFAP58/DNAAF5/DNAAF3/TTLL3/SPEF1/CFAP73
SC	GOBP_DETECTION_OF_LIGHT_STIMULUS	66	-0.41791	-1.9807	0.000694444	0.00887008	SLC24A4/EYS/CABP4/CEP250/SAG/RP1/RGR/GRM6/SLC24A2/SEMA5B/PDE6B/AIPL1/CNGB1/GRK4/BEST1/GRK7/CACNA1F/ABCA4/CRB1/PITPNM1/TRPC3/RHO/NR2E3/RS1/RCVRN/GJA10/OPN5/GNAT1/OPN1SW/TULP1/OPN4/GRK1/GUCY2D/CCDC66/PDE6C/ATP8A2/GNGT1/GUCY2F/PRPH2/PLEKHB1/ASIC2
SC	GOBP_AXONEMAL_DYNEIN_COMPLEX_ASSEMBLY	27	-0.564073	-2.12932	0.000755858	0.00887008	DNAL1/LRRC49/DNAAF1/DNAH7/DNAH2/CCDC40/DAW1/DNAH17/DNAH5/DNAH8/TEKT2/DNAI2/CCDC63/DNAI1/DRC1/CFAP100/CCDC65/CCDC39/ZMYND10/DNAH1/DNAAF5/DNAAF3/CFAP73
SC	GOBP_DNA_METHYLATION_INVOLVED_IN_GAMETE_GENERATION	20	-0.629998	-2.20026	0.000762195	0.00887008	KDM1B/PIWIL2/CTCFL/TDRD12/MAEL/FKBP6/ASZ1/TDRD1/MOV10L1/TDRD9/PLD6/TDRD5/DNMT3L/DNMT3A/DDX4/MORC1
SC	GOBP_PIRNA_METABOLIC_PROCESS	24	-0.57703	-2.12071	0.000762195	0.00887008	PIWIL2/TDRD12/MAEL/FKBP6/ASZ1/EXD1/PIWIL1/TDRD1/MOV10L1/BTBD18/TDRD9/PLD6/TEX15/TDRD5
SC	GOBP_MEIOTIC_CELL_CYCLE	252	-0.26122	-1.55391	0.00120409	0.00887008	ATM/XRCC2/MEIOC/FANCD2/CHFR/WBP2NL/MEI1/SLC26A8/ZFP42/EREG/BRIP1/PIWIL2/KIF18A/BRCA2/TDRD12/FAM9B/FAM9C/SLX4/RAD51D/NEK2/DMC1/TOP3A/MAEL/TUBGCP5/FBXO5/TAF1L/FKBP6/ESPL1/ASZ1/MCMDC2/SPIRE2/EXD1/PIWIL3/BRDT/FBXO43/BUB1B/NDC80/SYCP3/TEX11/C1orf146/MSH5/PIWIL1/EXO1/SGO1/RAD51/TUBGCP4/DMRT1/SGO2/TERB1/PRDM7/TERB2/NCAPH/AURKA/TDRD1/TRIP13/MOV10L1/PLK1/PRDM9/RAD54L/BTBD18/PLCB1/BOLL/TDRD9/TEX14/FMN2/FAN…
SC	GOBP_CILIUM_OR_FLAGELLUM_DEPENDENT_CELL_MOTILITY	140	-0.328972	-1.79553	0.00126823	0.00887008	INPP5B/SLC26A8/SPEF2/CATSPER2/DNAH14/ATP1A4/DNAH7/DNAH2/KLC3/DNAH3/CCR6/SLC9B1/CCDC40/EPPIN/CFAP69/CFAP54/CFAP52/CFAP157/TCTE1/TTLL6/TTLL9/PRDM14/CFAP206/DNAH17/CFAP65/DRC7/PRSS55/IQCF1/SORD/DZIP1/IQCG/CELF3/DNAH11/DNAH5/EFHC1/DNAH8/TEKT1/EFCAB1/NEURL1/SLC22A14/TAC4/TEKT2/CATSPERD/EFHC2/ROPN1/RSPH6A/NPHP4/ENO4/CATSPER4/QRICH2/TEX101/DNAI1/TBC1D21/CACNA1I/DRC1/DNAH6/CFAP46/CCDC65/PLA2G3/ARMC12/CCD…
SC	GOBP_INORGANIC_ANION_TRANSMEMBRANE_TRANSPORT	92	-0.338979	-1.71368	0.0013468	0.00887008	GABRB3/SLC26A8/SLC12A8/SLC4A8/GABRD/GABRG3/SLC6A1/GABRR2/SLC12A9/GABRG2/SLC25A30/SLC13A4/SLC26A4/CASR/SLC5A5/SLC37A3/GLRA1/SLC12A3/GABRA1/SLC4A1/BEST1/SLC12A5/GLRA3/GABRR1/SLC12A1/SLC26A9/CLCN1/SLC13A1/ANO7/SLC12A6/ANO5/GABRQ/SLC37A2/SLC5A1/ADAMTS8/SLC34A1/SLC26A3/SLC26A5/GABRB1/CLCN6/GABRA3/GRM5/SLC26A11/GABRA6/GABRB2/GLRA2/SLC4A11/GABRA5/ANO4/ANO9/SLC26A2/GABRA2
SC	GOBP_TRANSMISSION_OF_NERVE_IMPULSE	73	-0.376563	-1.82156	0.00137457	0.00887008	CNTNAP2/CACNG8/GRIK2/ANK3/CHRNB4/SCN8A/SCN1A/SCN7A/SCN1B/CNTNAP1/KCNMB4/NFASC/SCN11A/ITGA2/TNR/CHRM5/P2RX3/GLRA1/OTOA/CHRNA1/CLDN19/SPTBN4/GPR35/CACNA1G/CLCN1/SCN5A/P2RX4/KCNMB3/CACNG7/SCN9A/CACNG2/KCNA2/CACNG3/CACNG5/KCNMB2/SCN10A/MAG/CACNA1I/MTNR1B/SCN2A
SC	GOBP_REGULATION_OF_SYNAPTIC_TRANSMISSION_GLUTAMATERGIC	70	-0.386091	-1.84873	0.00138889	0.00887008	CACNG8/GRIK2/DISC1/GRM7/GRM6/TNR/RELN/UNC13A/NTRK1/MAPK8IP2/OPHN1/GRM4/SERPINE2/GRM2/GRIK3/HTR2A/CLN3/GRM1/NLGN3/SYT1/KMO/DRD2/CACNG7/DRD3/OXTR/CACNG2/CACNG3/NRXN1/CACNG5/GRM3/ROR2/GRM5/GRIK1/HTR1B/CACNG4/GRM8
SC	GOBP_CHLORIDE_TRANSMEMBRANE_TRANSPORT	67	-0.396949	-1.88212	0.00140351	0.00887008	GABRB3/SLC26A8/SLC12A8/SLC4A8/GABRD/GABRG3/SLC6A1/GABRR2/SLC12A9/GABRG2/SLC26A4/CASR/GLRA1/SLC12A3/GABRA1/SLC4A1/BEST1/SLC12A5/GLRA3/GABRR1/SLC12A1/SLC26A9/CLCN1/ANO7/SLC12A6/ANO5/GABRQ/SLC5A1/SLC26A3/SLC26A5/GABRB1/CLCN6/GABRA3/GABRA6/GABRB2/GLRA2/GABRA5/ANO4/ANO9/SLC26A2/GABRA2
SC	GOBP_CHAPERONE_MEDIATED_AUTOPHAGY	16	0.673069	2.47471	0.0014245	0.00887008	HSP90AA1/EEF1A1/HSPA8/CLU/CTSA/STUB1/ATG5/BAG3/SNRNP70/LAMP2/SYNPO2
SC	GOBP_NEGATIVE_REGULATION_OF_PROGRAMMED_NECROTIC_CELL_DEATH	16	0.721215	2.65173	0.0014245	0.00887008	CAV1/BOK/RBCK1/NUPR1/SLC25A4/BIRC2/FADD/YBX3/RIPK1/PELI1/BIRC3/ARHGEF2
SC	GOBP_REGULATION_OF_INTRINSIC_APOPTOTIC_SIGNALING_PATHWAY_IN_RESPONSE_TO_DNA_DAMAGE_BY_P53_CLASS_MEDIATOR	16	0.737721	2.71242	0.0014245	0.00887008	TRIAP1/MIF/TAF9/HNRNPK/CD44/CD74/ING2/KDM1A/RPL26/TAF9B/BCL2/SIRT1
SC	GOBP_MAINTENANCE_OF_PROTEIN_LOCATION_IN_NUCLEUS	23	0.587571	2.40663	0.00143062	0.00887008	SKP1/PARK7/ARL2BP/TXN/ARL2/CDK5/BBS4/TAF3/TOPORS/CHCHD10/HNRNPU/SUN2/SUPT7L/SUN1
SC	GOBP_POSITIVE_REGULATION_OF_MRNA_SPLICING_VIA_SPLICEOSOME	23	0.595345	2.43847	0.00143062	0.00887008	PRDX6/HSPA8/SNW1/CIRBP/THRAP3/NCL/RBM3/SNRNP70/TRA2B/SF3B4/TRA2A/RBMX
SC	GOBP_ESTABLISHMENT_OF_PROTEIN_LOCALIZATION_TO_CHROMOSOME	23	0.617351	2.52861	0.00143062	0.00887008	CCT5/TCP1/CCT7/CCT8/CCT6A/CCT4/PIH1D1/CCT3/NIPBL/DKC1/SPIDR/CCT2/SGF29/NABP2/ACD/RUVBL2/WRAP53
SC	GOBP_CHAPERONE_MEDIATED_PROTEIN_COMPLEX_ASSEMBLY	23	0.630391	2.58202	0.00143062	0.00887008	HSP90AB1/HSP90AA1/PTGES3/HSPD1/CLU/PSMG2/MKKS/STUB1/PSMG1/HSPA1A/HSPA4/CCT2/LONP1/NDUFAF1/BBS10
SC	GOBP_NUCLEAR_MEMBRANE_REASSEMBLY	23	0.630776	2.58359	0.00143062	0.00887008	CHMP3/CHMP2A/NSFL1C/VPS4A/BANF1/CHMP2B/CHMP1A/CHMP6/CHMP5/CHMP4A/UBE2I/REEP3/CHMP7/CHMP4B/REEP4
SC	GOBP_REGULATION_OF_OXIDATIVE_PHOSPHORYLATION	23	0.6549	2.6824	0.00143062	0.00887008	VCP/COX7A2L/PINK1/RHOA/COX7A2/DNAJC15/UQCC2/NUPR1/PPIF/COX7A1/AK4/MLXIPL/SHMT2/MYC/SNCA
SC	GOBP_REGULATION_OF_MITOTIC_SPINDLE_ASSEMBLY	23	0.659763	2.70232	0.00143062	0.00887008	CHMP3/CHMP2A/DRG1/CHMP2B/CHMP1A/CHMP6/HSPA1A/EML3/CHMP5/CHMP4A/CHMP7/HNRNPU/PDCD6IP/TPR/CHMP4B
SC	GOBP_MITOTIC_CYTOKINETIC_PROCESS	23	0.675919	2.7685	0.00143062	0.00887008	CHMP3/CHMP2A/RHOA/KLHDC8B/ARF1/VPS4A/CHMP2B/CHMP1A/CHMP6/CHMP5/CHMP4A/CHMP7/PDCD6IP/CHMP4B
SC	GOBP_ENDOTHELIAL_CELL_CHEMOTAXIS	28	0.512264	2.21626	0.00144092	0.00887008	HSPB1/TMSB4X/CORO1B/FGFR1/NRP1/RAB13/THBS1/FGF1/SMOC2/NOTCH1/KDR/PRKD1/FGF2/PRKD2/LGMN/PLEKHG5/NR4A1/EGR3
SC	GOBP_POSITIVE_REGULATION_OF_FILOPODIUM_ASSEMBLY	28	0.512837	2.21874	0.00144092	0.00887008	RALA/RHOQ/DOCK11/MIEN1/NRP1/DPYSL3/WASL/TGFBR1/PALM/PIK3R1/FNBP1L/FMR1/CDC42/SRF/ARAP1/CCL21/FSCN1
SC	GOBP_RECEPTOR_CATABOLIC_PROCESS	28	0.515157	2.22877	0.00144092	0.00887008	ANXA2/SH3GLB1/MYLIP/CDK5/MTMR2/LAPTM5/FURIN/MVB12A/KIF16B/APOE/CAPN1/UVRAG/SMURF1/PTPN1/BECN1/PIK3R4
SC	GOBP_LAMELLIPODIUM_MORPHOGENESIS	17	0.611631	2.27979	0.00144092	0.00887008	CORO1C/WASF2/ENPP2/CD44/CORO1B/ARHGEF7/KANK1/ABI1/PLEKHO1/SNX2/SNX1/WASF1
SC	GOBP_NEGATIVE_REGULATION_OF_ANOIKIS	17	0.615403	2.29385	0.00144092	0.00887008	ITGB1/CAV1/NTRK2/TLE1/PTRH2/BCL2/PDK4/ITGA5/MCL1/NOTCH1/PIK3CA/SNAI2
SC	GOBP_NEGATIVE_REGULATION_OF_NITRIC_OXIDE_METABOLIC_PROCESS	15	0.647756	2.30418	0.00144092	0.00887008	ATP2B4/CAV1/TSPO/GLA/SIRPA/CD34/ROCK2/RGN/ACP5/KHSRP/ZC3H12A
SC	GOBP_PROTEIN_LOCALIZATION_TO_PHAGOPHORE_ASSEMBLY_SITE	17	0.618321	2.30473	0.00144092	0.00887008	MFN2/WDR45B/WIPI2/ATG9A/ATG4B/ARFIP2/WIPI1/ATG13/PACS2/ATG4D/WDR45
SC	GOBP_POSITIVE_REGULATION_OF_CELL_MIGRATION_INVOLVED_IN_SPROUTING_ANGIOGENESIS	28	0.533198	2.30683	0.00144092	0.00887008	CIB1/ANXA1/SRPX2/ABL1/NRP1/HDAC7/MAP3K3/PLK2/KDR/HMOX1/FGF2/RHOJ
SC	GOBP_ESTABLISHMENT_OF_PROTEIN_LOCALIZATION_TO_TELOMERE	17	0.620908	2.31437	0.00144092	0.00887008	CCT5/TCP1/CCT7/CCT8/CCT6A/CCT4/CCT3/DKC1/CCT2/NABP2/ACD
SC	GOBP_REGULATION_OF_UNSATURATED_FATTY_ACID_BIOSYNTHETIC_PROCESS	15	0.654228	2.32721	0.00144092	0.00887008	ANXA1/FABP5/CD74/AVP/ABCD2/SIRT1/PIBF1
SC	GOBP_MITOCHONDRIAL_CALCIUM_ION_TRANSMEMBRANE_TRANSPORT	17	0.628414	2.34235	0.00144092	0.00887008	STOML2/SMDT1/VDAC1/MCUB/PSEN2/MICU3/PMPCB/MICU1/AFG3L2/MCU/SLC25A23/SLC8B1/MCUR1/MICU2
SC	GOBP_REGULATION_OF_PROTEIN_POLYUBIQUITINATION	28	0.551591	2.3864	0.00144092	0.00887008	UBE2V1/GABARAP/TRIP12/PPIA/GPS2/SASH1/PLAA/UBE2N/BIRC2/TRIM44/RNF40/NMI/UBE2D1/UBE2V2
SC	GOBP_CELLULAR_METABOLIC_COMPOUND_SALVAGE	28	0.551827	2.38742	0.00144092	0.00887008	DGUOK/TK2/APRT/NAPRT/PDXK/HPRT1/UCK1/ADI1/ENOPH1/ADK/BHMT2/ADA/UCKL1/PRTFDC1/UPP1/CDA/APIP/ADSL/PNP/AMPD2
SC	GOBP_TRNA_5_END_PROCESSING	15	0.674687	2.39998	0.00144092	0.00887008	HSD17B10/POP7/SSB/RPP25L/POP5/RPP21/TRMT10C/POP4/RPP40/RPP25/RPP38/RPP30/POP1
SC	GOBP_ANTIGEN_PROCESSING_AND_PRESENTATION_OF_PEPTIDE_ANTIGEN_VIA_MHC_CLASS_I	28	0.556287	2.40672	0.00144092	0.00887008	PDIA3/HLA-E/B2M/HLA-A/HLA-B/TAPBPL/HLA-C/CALR/HLA-F/AZGP1/FCER1G/LNPEP/ERAP1/IFI30/CLEC4A/MFSD6
SC	GOBP_REGULATION_OF_EARLY_ENDOSOME_TO_LATE_ENDOSOME_TRANSPORT	17	0.64652	2.40984	0.00144092	0.00887008	CHMP3/RDX/SNX3/DAB2/SNX12/MSN/MTMR2/EZR/MAP2K1/PTPN23/MAP2K2/DNAJC13/MAPK3
SC	GOBP_DEOXYRIBONUCLEOSIDE_TRIPHOSPHATE_METABOLIC_PROCESS	15	0.679792	2.41814	0.00144092	0.00887008	DGUOK/DUT/ITPA/DCTPP1/ADK/ADA/TBPL1/DTYMK/NUDT16
SC	GOBP_REGULATION_OF_DENDRITIC_CELL_DIFFERENTIATION	15	0.684644	2.4354	0.00144092	0.00887008	HMGB1/LGALS1/HLA-B/TMEM176B/LGALS3/TMEM176A/CEBPB/LGALS9/MIR223/AGER/FCGR2B/LILRB2
SC	GOBP_MIDBODY_ABSCISSION	17	0.656918	2.44859	0.00144092	0.00887008	CHMP3/CHMP2A/VPS4A/CHMP2B/CHMP1A/CHMP6/CHMP5/CHMP4A/CHMP7/PDCD6IP/CHMP4B
SC	GOBP_CELLULAR_RESPONSE_TO_THYROID_HORMONE_STIMULUS	17	0.667829	2.48927	0.00144092	0.00887008	RDX/CTSB/INHBB/CTSL/CTSH/THRB/LMO2/KLF9/GAS2L1/CTSS/MED1/GCLM
SC	GOBP_POSITIVE_REGULATION_OF_MITOCHONDRIAL_TRANSLATION	15	0.703047	2.50086	0.00144092	0.00887008	COA3/UQCC2/RCC1L/TRMT10C/C1QBP/MPV17L2/NGRN/MRPS27/RPUSD3/CDK5RAP1/FASTKD3
SC	GOBP_POSITIVE_REGULATION_OF_CYTOPLASMIC_TRANSLATION	15	0.709206	2.52277	0.00144092	0.00887008	YBX1/CSDE1/HNRNPD/CNBP/PABPC1/SYNCRIP/PAIP1/PKM/YBX3/DHX9/HNRNPU
SC	GOBP_NEGATIVE_REGULATION_OF_PEPTIDYL_THREONINE_PHOSPHORYLATION	17	0.678723	2.52987	0.00144092	0.00887008	CALM1/CALM2/INPP5K/EIF4G1/CALM3/PARD3/DMTN/DDIT4/SPRY2/SPRED2/TTC36
SC	GOBP_ANTIGEN_PROCESSING_AND_PRESENTATION_OF_EXOGENOUS_PEPTIDE_ANTIGEN_VIA_MHC_CLASS_II	28	0.586834	2.53887	0.00144092	0.00887008	CTSF/HLA-DRA/HLA-DRB1/HLA-DMA/B2M/HLA-DPA1/HLA-DPB1/CD74/HLA-DQB1/CTSD/HLA-DMB/CTSL/HLA-DRB5/FCER1G/IFI30/HLA-DQA1/HLA-DQA2/FCGR2B/LGMN/CTSS/PIKFYVE
SC	GOBP_POSITIVE_REGULATION_OF_TELOMERASE_RNA_LOCALIZATION_TO_CAJAL_BODY	15	0.718165	2.55464	0.00144092	0.00887008	CCT5/TCP1/CCT7/CCT8/CCT6A/CCT4/NHP2/NOP10/CCT3/DKC1/CCT2/RUVBL2
SC	GOBP_CELLULAR_RESPONSE_TO_STEROL_DEPLETION	15	0.718475	2.55574	0.00144092	0.00887008	INSIG1/ERLIN1/TMED2/SCAP/FBXW7/SREBF2/SREBF1/EIF2A/ZBTB7B/ERLIN2/ARHGEF10L/LPCAT3/AMFR/INSIG2
SC	GOBP_TAIL_ANCHORED_MEMBRANE_PROTEIN_INSERTION_INTO_ER_MEMBRANE	15	0.720643	2.56346	0.00144092	0.00887008	EMC6/CAMLG/MMGT1/EMC9/EMC7/UBL4A/BAG6/GET4/EMC8/EMC3/EMC4/SGTA/EMC2
SC	GOBP_VESICLE_TARGETING_ROUGH_ER_TO_CIS_GOLGI	15	0.742404	2.64086	0.00144092	0.00887008	TMED10/PEF1/PREB/TFG/PPP6C/SAR1A/KLHL12/PDCD6/SEC16A/TMED2/CUL3
SC	GOBP_POSITIVE_REGULATION_OF_PROTEIN_EXPORT_FROM_NUCLEUS	17	0.7093	2.64384	0.00144092	0.00887008	ANP32B/YWHAE/GAS6/BAG3/CAMK1/RBM22/PPM1A/EMD/TPR/TCF7L2/RAPGEF3/PRKACA
SC	GOBP_POSITIVE_REGULATION_OF_CELLULAR_EXTRAVASATION	17	0.710356	2.64778	0.00144092	0.00887008	CD99/XG/CD99L2/MDK/THY1/LYVE1/FADD/PDGFD/PLVAP/IL1R1/JAM3/CD47/ICAM1/AGER
SC	GOBP_REGULATION_OF_CYTOPLASMIC_TRANSLATION	28	0.613793	2.65551	0.00144092	0.00887008	YBX1/CSDE1/YTHDF2/HNRNPD/CNBP/PABPC1/SYNCRIP/RPL13A/PAIP1/PKM/YBX3/DHX9/HNRNPU/NCK1/MTOR/FMR1
SC	GOBP_POSITIVE_REGULATION_OF_PROTEIN_DEACETYLATION	28	0.636194	2.75243	0.00144092	0.00887008	C6orf89/NDN/PINK1/SAP30BP/ING2/BRMS1/BCL6/NIPBL/NNMT/CTBP1/APLNR/FNTA/SREBF1/SIRT1/AKAP8L/PRKD1/ZBTB7B/RRP8/SUV39H1/PRKD2
SC	GOBP_PROTEIN_K11_LINKED_UBIQUITINATION	28	0.643327	2.78329	0.00144092	0.00887008	UBE2L3/CDC16/UBE2E3/UBE2H/UBE2D3/UBE2E2/ANAPC11/ANAPC13/CDC26/UBE2D4/RNF26/CDC23/UBE2B/UBE2A/ANAPC10/ANAPC7/ANAPC4/UBE2T
SC	GOBP_MORPHOGENESIS_OF_AN_ENDOTHELIUM	17	0.755959	2.81776	0.00144092	0.00887008	RBPJ/CSNK2B/RHOA/ADAMTS12/FGF1/RHOB/CCM2/BMP4/STARD13/CXCR4/ACVRL1/CTNNB1/CXCL10/PRKD2
SC	GOBP_MATURATION_OF_LSU_RRNA	28	0.653178	2.82591	0.00144092	0.00887008	SNU13/EIF6/MRPL1/RPL35/NHP2/RPL7/RPL7A/NSA2/FTSJ3/RPF1/RPL10A/LAS1L/RPF2/RSL1D1/DDX18/BOP1/NIFK/GTPBP4/PES1/MAK16
SC	GOBP_REGULATION_OF_INTRINSIC_APOPTOTIC_SIGNALING_PATHWAY_BY_P53_CLASS_MEDIATOR	28	0.6568	2.84158	0.00144092	0.00887008	UBB/PTTG1IP/TRIAP1/MIF/TAF9/HNRNPK/CD44/RPS7/CD74/RRN3/ING2/KDM1A/RPL26/TAF9B/EIF5A/BCL2/MSX1/SIRT1/MYC
SC	GOBP_RESPONSE_TO_MITOCHONDRIAL_DEPOLARISATION	17	0.768057	2.86285	0.00144092	0.00887008	PINK1/OPTN/MFN2/SQSTM1/HTRA2/MUL1/GPS2/TOMM7/HUWE1/CDC37/GBA/BECN1/HK2
SC	GOBP_MITOCHONDRIAL_ELECTRON_TRANSPORT_CYTOCHROME_C_TO_OXYGEN	15	0.805697	2.86601	0.00144092	0.00887008	COX4I1/COX6A1/COX5B/COX7A2L/COX5A/COX7A1/COX7C/MT-CO3/COX4I2/MT-CO1/MT-CO2/CYCS/COX15
SC	GOBP_LATE_ENDOSOME_TO_VACUOLE_TRANSPORT_VIA_MULTIVESICULAR_BODY_SORTING_PATHWAY	17	0.770457	2.8718	0.00144092	0.00887008	VPS25/TMEM50A/CHMP6/VPS28/CHMP5/CHMP4A/CHMP7/VTA1/CHMP4B/LEPROT/SNF8/STAM/TMEM50B/PTPN23
SC	GOBP_ESTABLISHMENT_OF_PROTEIN_LOCALIZATION_TO_MITOCHONDRIAL_MEMBRANE	28	0.666801	2.88484	0.00144092	0.00887008	PDCD5/NDUFA13/TIMM13/HSP90AA1/TOMM22/TIMM9/TOMM70/TIMM22/ROMO1/TIMM8B/BCS1L/TIMM10/CALM3/TIMM10B/SAMM50/HSPA4/AP3B1/NMT1/MOAP1/OXA1L
SC	GOBP_VIRAL_RELEASE_FROM_HOST_CELL	28	0.70822	3.06404	0.00144092	0.00887008	CHMP3/CHMP2A/RAB7A/IST1/VAPA/VPS4A/CAV2/PPIA/TSG101/CHMP2B/PC/CHMP1A/ARL8B/CHMP6/CHMP5/CHMP4A/CHMP7/CHMP4B
SC	GOBP_REGULATION_OF_OXIDATIVE_STRESS_INDUCED_INTRINSIC_APOPTOTIC_SIGNALING_PATHWAY	28	0.759209	3.28464	0.00144092	0.00887008	SOD1/GPX1/PINK1/HTRA2/P4HB/NOL3/HSPB1/PARK7/NFE2L2/PPIA/NONO/PARP1/SFPQ/UBQLN1/TRAP1/BAG5/FBXW7/AKT1/MCL1/NME5/TREM2/SIRT1
SC	GOBP_VIRAL_TRANSLATION	17	0.885739	3.3015	0.00144092	0.00887008	EIF3L/EIF3A/CSDE1/EIF3D/SSB/EIF3F/PCBP2/EIF3B/ATG5/EIF3G/PTBP1/ATG12/DHX9/EIF2AK4
SC	GOBP_REGULATION_OF_LIPOPROTEIN_METABOLIC_PROCESS	18	0.621046	2.35675	0.001443	0.00887008	DBI/LEP/DGAT2/APOD/ATG101/GBA/ITGAV/RB1CC1/ANGPTL8/RABL3/RAB3GAP1/ATG13/ULK1/RAB3GAP2
SC	GOBP_PERK_MEDIATED_UNFOLDED_PROTEIN_RESPONSE	18	0.642305	2.43743	0.001443	0.00887008	BOK/HSPA5/ATF4/DDIT3/EIF2S1/NFE2L2/TMED2/QRICH1/NCK1/PTPN1/PPP1R15A
SC	GOBP_ANTIGEN_PROCESSING_AND_PRESENTATION_OF_ENDOGENOUS_PEPTIDE_ANTIGEN	18	0.658517	2.49895	0.001443	0.00887008	HLA-DRA/HLA-DRB1/HLA-E/B2M/HLA-A/HLA-B/HLA-C/HLA-F/AZGP1/ERAP1
SC	GOBP_REGULATION_OF_EXOSOMAL_SECRETION	18	0.674323	2.55893	0.001443	0.00887008	CHMP3/CHMP2A/RAB7A/ATP9A/VPS4A/TSG101/CHMP6/SDCBP/PDCD6IP/SNF8/STAM/HGS/SDC4
SC	GOBP_NEGATIVE_REGULATION_OF_CALCIUM_ION_TRANSPORT_INTO_CYTOSOL	18	0.674732	2.56048	0.001443	0.00887008	TMBIM6/CALM1/SRI/CALM2/GSTO1/FKBP1A/CALM3/BCL2/GSTM2/PKD2/TRDN/FKBP1B
SC	GOBP_HEMATOPOIETIC_STEM_CELL_HOMEOSTASIS	18	0.683073	2.59213	0.001443	0.00887008	FSTL1/ARMCX1/OCIAD1/SOX4/EXT1/UBAP2L/EMCN/OCIAD2/TCIRG1/MYCT1/NLE1/ADAR/GLIS2
SC	GOBP_NEGATIVE_REGULATION_OF_ENDOPLASMIC_RETICULUM_STRESS_INDUCED_INTRINSIC_APOPTOTIC_SIGNALING_PATHWAY	18	0.709401	2.69204	0.001443	0.00887008	TMBIM6/WFS1/CREB3/XBP1/PARK7/TXNDC12/GRINA/HERPUD1/SYVN1/HSPA1A/BCL2L1/PTPN1
SC	GOBP_PROTEIN_NEDDYLATION	18	0.715736	2.71608	0.001443	0.00887008	RBX1/COPS9/EPAS1/RPL11/RPL5/NEDD8/UBE2F/RNF7/UBE2M/UBA3/DCUN1D4/DCUN1D5/DCUN1D1/NAE1/DCUN1D3
SC	GOBP_PEPTIDE_ANTIGEN_ASSEMBLY_WITH_MHC_PROTEIN_COMPLEX	18	0.74239	2.81723	0.001443	0.00887008	PDIA3/HLA-DRA/HLA-DRB1/HLA-DMA/B2M/HLA-DPA1/HLA-DPB1/TAPBPL/HLA-DQB1/HLA-DMB/CALR/HLA-DRB5/HLA-DQA1/HLA-DQA2/TAPBP
SC	GOBP_RIBOSOMAL_SMALL_SUBUNIT_ASSEMBLY	18	0.784152	2.97571	0.001443	0.00887008	XRCC5/RPS19/RPS5/RPSA/ERAL1/RPS15/ABT1/MRPS11/RPS28/RPS14/MRPS7/PRKDC/RPS27/RPL38/RPS27L/RRP7A
SC	GOBP_NEGATIVE_REGULATION_OF_NUCLEOCYTOPLASMIC_TRANSPORT	22	0.589853	2.38079	0.00144509	0.00887008	CD36/SUMO1/PARK7/APOD/TXN/PKIG/MDFIC/CDK5/TPR/ANGPT1/NUP153/UFM1/CHP1
SC	GOBP_CYTOPLASMIC_SEQUESTERING_OF_PROTEIN	22	0.603433	2.43561	0.00144509	0.00887008	YWHAB/SRI/GOPC/PSMD10/TMSB4X/KEAP1/GET4/DBN1/CCDC22/FLNA/NFKBIA/PKD2/MDFI/NFKBIE/FAF1/SUFU/LATS1
SC	GOBP_INTEGRATED_STRESS_RESPONSE_SIGNALING	22	0.640782	2.58636	0.00144509	0.00887008	BOK/HSPA5/ATF4/DDIT3/EIF2S1/NFE2L2/EIF2AK1/EIF2AK4/TMED2/QRICH1/NCK1/IMPACT/PTPN1/PPP1R15A
SC	GOBP_SPLICEOSOMAL_TRI_SNRNP_COMPLEX_ASSEMBLY	22	0.650413	2.62523	0.00144509	0.00887008	PRPF31/PRPF6/LSM2/CD2BP2/SRSF10/AAR2/SART3
SC	GOBP_POSITIVE_REGULATION_OF_HISTONE_DEACETYLATION	22	0.664093	2.68044	0.00144509	0.00887008	C6orf89/PINK1/SAP30BP/ING2/BCL6/NIPBL/CTBP1/APLNR/SREBF1/SIRT1/AKAP8L/PRKD1/ZBTB7B/RRP8/SUV39H1/PRKD2
SC	GOBP_VESICLE_TARGETING_TO_FROM_OR_WITHIN_GOLGI	22	0.702569	2.83574	0.00144509	0.00887008	TMED10/PEF1/PREB/TFG/PPP6C/SAR1A/ARFGAP3/KLHL12/PDCD6/SEC16A/GBF1/TMED2/ARFGAP2/CUL3/WIPI1/TMED9
SC	GOBP_VESICLE_CARGO_LOADING	25	0.575315	2.4125	0.00144718	0.00887008	TMED10/SEC13/RAB1A/SAR1A/INSIG1/PICALM/SEC31A/TMED2/SCAP/SEC24C/SEC24B/SEC23B/KIF13A/SEC24A
SC	GOBP_REGULATION_OF_CYTOPLASMIC_TRANSPORT	25	0.575339	2.4126	0.00144718	0.00887008	CHMP3/RDX/ATP9A/SNX3/DAB2/SNX12/MSN/ARFIP1/USP7/MTMR2/EZR/MAP2K1/PTPN23/MAP2K2/DNAJC13/RAB29/MAPK3
SC	GOBP_REGULATION_OF_PROTEIN_SUMOYLATION	25	0.59989	2.51555	0.00144718	0.00887008	MUL1/PARK7/SAE1/GNL3/UBA2/RWDD3/TOLLIP/PIAS1/ZMIZ1/UBE2I/RELA/HMG20B/PIAS4/CTNNB1/PIAS3/HMG20A/EGR1/CAPN3
SC	GOBP_ANTIGEN_PROCESSING_AND_PRESENTATION_OF_ENDOGENOUS_ANTIGEN	25	0.602047	2.52459	0.00144718	0.00887008	HLA-DRA/HLA-DRB1/HLA-E/B2M/HLA-A/HLA-B/CD74/ATG5/HLA-C/HLA-F/AZGP1/ERAP1/CD1C
SC	GOBP_NEGATIVE_REGULATION_OF_RNA_SPLICING	25	0.657714	2.75803	0.00144718	0.00887008	TMBIM6/SAP18/RBM42/HNRNPK/SRSF7/C1QBP/SRSF9/RPS13/SRSF10/PTBP1/SRSF6/RBM10/RPS26/HNRNPA2B1/PCBP4/SRSF4/RBMX/RNPS1/SFSWAP/U2AF2/PTBP3
SC	GOBP_NEGATIVE_REGULATION_OF_CELL_MIGRATION_INVOLVED_IN_SPROUTING_ANGIOGENESIS	25	0.681181	2.85643	0.00144718	0.00887008	ITGB1BP1/RHOA/PDCD10/MMRN2/MAP2K5/THBS1/MEOX2/STARD13/NOTCH1/HDAC5/KLF4
SC	GOBP_COTRANSLATIONAL_PROTEIN_TARGETING_TO_MEMBRANE	25	0.692415	2.90354	0.00144718	0.00887008	SEC61B/SRP14/SIL1/SRP72/SEC61A1/SEC62/SRP54/ZFAND2B/TRAM1/SSR3/SRP68/SRP9/SEC63/ARL6IP1/SRPRA/SSR2/SSR1/TRAM2
SC	GOBP_RIBOSOMAL_LARGE_SUBUNIT_ASSEMBLY	25	0.702155	2.94438	0.00144718	0.00887008	RPL3/MRPL20/RPLP0/RPL6/RPL10/RPL11/DDX28/RPL5/RPL24/RPF2/BOP1/TRAF7/DHX30/PPAN/RPL38/RPL23A/RRS1/MRTO4/NLE1
SC	GOBP_LATE_ENDOSOME_TO_VACUOLE_TRANSPORT	25	0.745823	3.1275	0.00144718	0.00887008	CHMP3/CHMP2A/VPS25/CHMP2B/TMEM50A/CHMP1A/CHMP6/VPS28/CHMP5/CHMP4A/CHMP7/VTA1/CHMP4B/LEPROT/SNF8/STAM/TMEM50B/PTPN23/BECN1/PIK3R4
SC	GOBP_REGULATION_OF_MONOCYTE_DIFFERENTIATION	20	0.584671	2.27911	0.00144928	0.00887008	HOXA7/HLA-DRB1/CTNNBIP1/CD74/ZFP36L1/CD4/FES/IRF7/CSF1/ACIN1/MYC/CDK6
SC	GOBP_TYPE_B_PANCREATIC_CELL_PROLIFERATION	20	0.589637	2.29847	0.00144928	0.00887008	BAD/NUPR1/IGFBP4/SFRP1/IGFBP5/SERPINB1/BTBD10/ANGPTL8/FMC1/ERRFI1/NR1D1/WDR13/MEN1/SIDT2
SC	GOBP_MIDDLE_EAR_MORPHOGENESIS	20	0.606938	2.36591	0.00144928	0.00887008	PRKRA/INSIG1/OSR2/NAGLU/SIX1/PRRX1/TSHZ1/GSC/EDNRA/EDN1/MSX1/RPL38/INSIG2
SC	GOBP_PEPTIDYL_ASPARAGINE_MODIFICATION	24	0.58163	2.39996	0.00144928	0.00887008	RPN2/DAD1/ALG5/OST4/UBE2J1/RPN1/DDOST/OSTC/NUDT14/MGAT1/ALG8/TUSC3/MGAT5/STT3A/STT3B
SC	GOBP_MITOCHONDRIAL_DEPOLARIZATION	20	0.61758	2.40739	0.00144928	0.00887008	BOK/PPP2R3C/TSPO/RACK1/DCN/PARP1/ABL1/MYOC/BCL2/IFI6/KDR
SC	GOBP_PLASMA_MEMBRANE_REPAIR	24	0.594202	2.45184	0.00144928	0.00887008	CHMP3/CHMP2A/SMPD1/CHMP2B/MYH9/CHMP1A/ARL8B/CHMP6/ANXA6/MYOF/CHMP5/CHMP4A/CHMP7/CHMP4B
SC	GOBP_GTP_METABOLIC_PROCESS	24	0.601301	2.48113	0.00144928	0.00887008	NME4/RHOA/IMPDH2/NME2/RHOQ/RAN/NME3/NME1/AK3/GIMAP7/IMPDH1/AK4/NME5/EFL1
SC	GOBP_REGULATION_OF_ARP2_3_COMPLEX_MEDIATED_ACTIN_NUCLEATION	20	0.642629	2.50503	0.00144928	0.00887008	BRK1/WASF2/ARF1/CYFIP1/CORO1B/ARFIP1/GMFG/WASF3/WASL/GMFB/ARFIP2/FCHSD2/WASF1
SC	GOBP_PYRIMIDINE_DEOXYRIBONUCLEOTIDE_METABOLIC_PROCESS	24	0.609226	2.51383	0.00144928	0.00887008	DUT/DCTD/DCTPP1/NEIL2/NT5C/NTHL1/MBD4/UNG/TYMP/SMUG1/TBPL1/DTYMK/UPP1/SHMT1/TDG
SC	GOBP_TRANSPORT_OF_VIRUS	20	0.64806	2.52621	0.00144928	0.00887008	CAV1/CAV2/RNASEK/DYNLT1/BST2/KPNA3/KPNA2/CTSL/KPNA6/TPCN1/NUP153/FMR1/SIGLEC1/EPS15/PIKFYVE
SC	GOBP_REGULATION_OF_NUCLEAR_TRANSCRIBED_MRNA_CATABOLIC_PROCESS_DEADENYLATION_DEPENDENT_DECAY	24	0.618208	2.55089	0.00144928	0.00887008	YBX1/CSDE1/HNRNPD/PABPC1/SYNCRIP/PAIP1/ZFP36L1/CNOT7/ZFP36L2/DHX9/HNRNPU/TOB1/CNOT1/RC3H1/ZFP36/TNRC6C
SC	GOBP_NEGATIVE_REGULATION_OF_INTRINSIC_APOPTOTIC_SIGNALING_PATHWAY_BY_P53_CLASS_MEDIATOR	20	0.654501	2.55131	0.00144928	0.00887008	PTTG1IP/TRIAP1/MIF/TAF9/CD44/CD74/RRN3/ING2/KDM1A/TAF9B/BCL2/SIRT1
SC	GOBP_PROTEIN_IMPORT_INTO_MITOCHONDRIAL_MATRIX	20	0.657656	2.56361	0.00144928	0.00887008	TIMM23/TOMM20/GRPEL1/DNAJC15/TOMM70/DNAJC19/PAM16/ROMO1/TOMM7/TIMM17B/DNLZ/TOMM40L/TIMM44/TIMM17A
SC	GOBP_NEGATIVE_REGULATION_OF_MRNA_SPLICING_VIA_SPLICEOSOME	20	0.66354	2.58655	0.00144928	0.00887008	SAP18/RBM42/HNRNPK/SRSF7/C1QBP/SRSF9/SRSF10/PTBP1/SRSF6/RBM10/HNRNPA2B1/PCBP4/SRSF4/RBMX/RNPS1/SFSWAP/U2AF2
SC	GOBP_MITOCHONDRIAL_CYTOCHROME_C_OXIDASE_ASSEMBLY	20	0.678803	2.64604	0.00144928	0.00887008	COX14/SURF1/COA3/SMIM20/COA4/COA5/BCS1L/PET117/COX20/COX17/COX16/PET100/OXA1L/TACO1
SC	GOBP_REGULATION_OF_ERAD_PATHWAY	20	0.680863	2.65408	0.00144928	0.00887008	BCAP31/CAV1/UBXN1/RNF185/NFE2L2/HERPUD1/BAG6/TMEM259/UBQLN2/UBQLN1/SGTA/AQP11/USP14/USP19/USP25/USP13
SC	GOBP_POSITIVE_REGULATION_OF_VACUOLE_ORGANIZATION	20	0.684218	2.66715	0.00144928	0.00887008	ANXA2/SH3GLB1/RALB/GRN/PIP4K2B/PIP4K2A/MOAP1/WIPI1/SNX4/RAB3GAP1/SNX7/BECN1/SNX18/WDR45/ULK1/RAB3GAP2/PIP4K2C
SC	GOBP_NEGATIVE_REGULATION_OF_NECROTIC_CELL_DEATH	20	0.687789	2.68107	0.00144928	0.00887008	CAV1/BOK/NOL3/RBCK1/NUPR1/SLC25A4/BIRC2/FADD/YBX3/RIPK1/PELI1/BIRC3/ARHGEF2/MIR223
SC	GOBP_RESPIRATORY_CHAIN_COMPLEX_IV_ASSEMBLY	24	0.6552	2.70353	0.00144928	0.00887008	COX14/SURF1/COA3/SMIM20/COA4/COA5/BCS1L/MT-CO3/COA6/PET117/COX20/COX17/COX16/PET100/OXA1L/TACO1/COX15
SC	GOBP_REGULATION_OF_TRANSLATION_IN_RESPONSE_TO_STRESS	20	0.697641	2.71948	0.00144928	0.00887008	EIF2S1/NPM1/EIF2AK1/PPP1CA/EIF4G1/RBM4/DNAJC3/EIF2AK4/SESN2/TMED2/NCK1/IMPACT/PPP1R15A/RPS6KA1/DDX3X/PPP1R15B
SC	GOBP_EXTRACELLULAR_VESICLE_BIOGENESIS	24	0.662026	2.7317	0.00144928	0.00887008	CHMP3/CHMP2A/RAB7A/ATP9A/VPS4A/TSG101/RAB11A/CHMP6/SDCBP/CD34/PDCD6IP/SNF8/ARRDC1/STAM/HGS/ARRDC4/SDC4
SC	GOBP_CELLULAR_RESPONSE_TO_FLUID_SHEAR_STRESS	20	0.730851	2.84893	0.00144928	0.00887008	ASS1/NFE2L2/MMP2/MAP2K5/HDAC3/TFPI2/KLF2/PKD2/SREBF2/MEF2C/PLEC/KLF4/MTSS1/SOCS5/PTK2B
SC	GOBP_POTASSIUM_ION_IMPORT_ACROSS_PLASMA_MEMBRANE	49	-0.437599	-1.93707	0.00145138	0.00887008	KCNJ6/SLC12A8/DLG1/KCNJ14/ATP1A4/SLC12A9/KCNJ3/KCNJ16/KCNJ15/WNK3/SLC12A3/KCNJ5/ATP1B2/ATP1A3/WNK4/KCNJ10/KCNJ11/SLC12A5/SLC12A1/KCNJ12/WNK2/KCNK5/SLC12A6/ATP12A/FXYD2/ATP4A/HCN4/KCNH2/KCNJ9/KCNK9/KCNJ18/ATP4B
SC	GOBP_NEGATIVE_REGULATION_OF_SMOOTH_MUSCLE_CELL_MIGRATION	29	0.525789	2.29708	0.00145349	0.00887008	APEX1/RHOA/GNA12/NFE2L2/AIF1/CORO1B/IGFBP3/ADIPOQ/IGFBP5/LRP1/GNA13/MEF2C/TRIB1/SLIT2/TPM1/MIR223
SC	GOBP_REGULATION_OF_ENDOPLASMIC_RETICULUM_UNFOLDED_PROTEIN_RESPONSE	29	0.531666	2.32275	0.00145349	0.00887008	WFS1/BOK/HSPA5/DDRGK1/XBP1/RACK1/UFL1/BFAR/DNAJB9/ATF6/PIK3R1/NCK1/FICD/PTPN1/PPP1R15A
SC	GOBP_RENAL_SYSTEM_VASCULATURE_DEVELOPMENT	29	0.537766	2.3494	0.00145349	0.00887008	PECAM1/PDGFRB/NRP1/CD34/PDGFD/PKD2/BMP4/ANGPT1/EDNRA/HES1/TEK/NOTCH1/ACTA2/NOTCH3/NOTCH2/PDGFRA/EGR1/PDGFB
SC	GOBP_MITOCHONDRIAL_FUSION	29	0.541147	2.36417	0.00145349	0.00887008	PARL/STOML2/MFF/MFN2/MTCH2/FIS1/MUL1/VAT1/CHCHD3/PID1/ZDHHC6/HUWE1/BNIP3/USP30/AFG3L2/TFRC/OPA1
SC	GOBP_RESPONSE_TO_INTERFERON_BETA	29	0.541961	2.36773	0.00145349	0.00887008	NDUFA13/HTRA2/CAPN2/STAT1/IFITM3/BST2/TREX1/UBE2K/IFITM2/IFITM1/CDC34/IFI16/PLSCR1/UBE2G2/IFNAR2/MNDA/XAF1
SC	GOBP_NEGATIVE_REGULATION_OF_SIGNAL_TRANSDUCTION_BY_P53_CLASS_MEDIATOR	29	0.542873	2.37171	0.00145349	0.00887008	PTTG1IP/TRIAP1/MIF/PSMD10/TAF9/CD44/CD74/RRN3/ING2/RNF34/TWIST1/KDM1A/TAF9B/BCL2/SIRT1/SNAI2
SC	GOBP_PROTEIN_LOCALIZATION_TO_CHROMOSOME_TELOMERIC_REGION	29	0.569323	2.48727	0.00145349	0.00887008	CCT5/TCP1/XRCC5/CCT7/CCT8/CCT6A/CCT4/TERF2IP/ATRX/TPP1/GNL3/CCT3/PINX1/DKC1/CCT2/NABP2/ACD/TNKS2
SC	GOBP_NEGATIVE_REGULATION_OF_MRNA_PROCESSING	29	0.638956	2.79148	0.00145349	0.00887008	NELFE/SAP18/RNF20/RBM42/HNRNPK/SRSF7/C1QBP/SRSF9/CTR9/SRSF10/RNF40/PTBP1/SRSF6/RBM10/CDK9/SUPT5H/HNRNPA2B1/PCBP4/SRSF4/RBMX/RNPS1/SFSWAP/CCNT1/U2AF2
SC	GOBP_NEGATIVE_REGULATION_OF_INTRINSIC_APOPTOTIC_SIGNALING_PATHWAY_IN_RESPONSE_TO_DNA_DAMAGE	29	0.707877	3.09259	0.00145349	0.00887008	TPT1/CLU/TRIAP1/MIF/TAF9/CD44/CD74/CXCL12/ING2/USP47/KDM1A/BCL2L1/TAF9B/SFRP2/BCL2/CDKN2D/TMEM161A/TRIM32/SIRT1/SNAI2/BID/CCAR2/ACKR3
SC	GOBP_REGULATION_OF_MRNA_POLYADENYLATION	19	0.649056	2.50313	0.00145773	0.00887008	NELFE/NCBP2/RNF20/YTHDC1/CTR9/RNF40/CDK9/SNRPA/SUPT5H/CPSF7/HSF1/ZC3H3/CCNT1/CPSF6
SC	GOBP_MODULATION_BY_HOST_OF_VIRAL_GENOME_REPLICATION	19	0.657948	2.53742	0.00145773	0.00887008	PHB/HSPA8/VAPA/PPIB/IFI27/NUCKS1/STOM/ZBED1/CCNK/EIF2AK4/FMR1/CCL8
SC	GOBP_SRP_DEPENDENT_COTRANSLATIONAL_PROTEIN_TARGETING_TO_MEMBRANE	19	0.683038	2.63418	0.00145773	0.00887008	SEC61B/SRP14/SRP72/SEC61A1/SRP54/ZFAND2B/TRAM1/SSR3/SRP68/SRP9/SEC63
SC	GOBP_LATE_ENDOSOME_TO_LYSOSOME_TRANSPORT	19	0.749384	2.89005	0.00145773	0.00887008	CHMP3/CHMP2A/SNAPIN/VPS35/CHMP2B/VPS39/CHMP1A/ARL8B/CHMP6/CHMP5/CHMP4A/CHMP7/CHMP4B/VPS41/C9orf72
SC	GOBP_NEGATIVE_REGULATION_OF_OXIDATIVE_STRESS_INDUCED_INTRINSIC_APOPTOTIC_SIGNALING_PATHWAY	19	0.752106	2.90054	0.00145773	0.00887008	GPX1/PINK1/HTRA2/NOL3/HSPB1/PARK7/NFE2L2/PPIA/NONO/TRAP1/BAG5/AKT1/NME5/SIRT1
SC	GOBP_NEGATIVE_REGULATION_OF_RELEASE_OF_CYTOCHROME_C_FROM_MITOCHONDRIA	19	0.752815	2.90328	0.00145773	0.00887008	PARL/GPX1/GHITM/CLU/TRIAP1/NOL3/PRELID1/PSMD10/LMNA/PPIF/IGF1/BCL2L1/AVP/AKT1/BCL2L2/OPA1
SC	GOBP_NEGATIVE_REGULATION_OF_TRANSLATIONAL_INITIATION	19	0.76666	2.95667	0.00145773	0.00887008	EIF4EBP3/PAIP2/ATF4/EIF2S1/EIF2AK1/EIF4EBP2/RPL13A/EIF4EBP1/RBM4/LARP1/C8orf88/EIF2AK4/TPR/BANK1/FMR1/EIF3E
SC	GOBP_SEROTONIN_RECEPTOR_SIGNALING_PATHWAY	39	-0.500195	-2.1003	0.00145985	0.00887008	HTR3B/OR10H5/HRH4/OR10H1/HTR1D/CHRM5/HTR2A/HTR3A/HTR3D/HTR3E/HTR3C/CHRM3/HTR6/HTR4/CHRM2/HTR1E/HTR1A/HTR1B/HTR5A/CHRM1/HRH3/HTR7/OR10H4/OR10H2/CHRM4/OR10H3/OR11H4/OR6T1/HTR2C/OR10J5/OR5T2
SC	GOBP_POSITIVE_REGULATION_OF_FOCAL_ADHESION_ASSEMBLY	26	0.578833	2.43838	0.00146199	0.00887008	ITGB1BP1/POLDIP2/RAC1/S100A10/FERMT2/SMAD3/MAP4K4/SFRP1/THY1/ABL1/NRP1/MYOC/ROCK1/TEK/KDR/SDC4/COL16A1
SC	GOBP_NEGATIVE_REGULATION_OF_PHOSPHOPROTEIN_PHOSPHATASE_ACTIVITY	26	0.599576	2.52576	0.00146199	0.00887008	BOD1/PPP1R11/CRY2/FKBP1A/TIPRL/PPP1R1B/LGALS3/GNAI2/STYXL1/ROCK1/ROCK2/FKBP1B/MGAT5/PPP1R15A/RGN/BOD1L1/PTPA
SC	GOBP_ENDOPLASMIC_RETICULUM_TO_CYTOSOL_TRANSPORT	26	0.755845	3.18405	0.00146199	0.00887008	VCP/HSP90B1/SEC61B/BCAP31/OS9/AUP1/UBE2J1/DERL1/ERLEC1/DERL2/HERPUD1/SYVN1/EDEM2/FAF2/TMEM129/SEL1L/UBE2G2/RHBDD1/UBAC2
SC	GOBP_CYTOPLASMIC_TRANSLATIONAL_INITIATION	26	0.837477	3.52793	0.00146199	0.00887008	EIF2S2/EIF3A/YTHDF2/SLBP/EIF3D/EIF4H/EIF3I/EIF4B/DHX29/EIF5/RPL13A/EIF4A1/EIF2B3/EIF4G1/EIF4A2/RBM4/MIF4GD/EIF3CL/EIF3M/NCK1/EIF2S3/MTOR
SC	GOBP_POSITIVE_REGULATION_OF_LIPID_STORAGE	27	0.539172	2.28817	0.00147275	0.00887008	CD36/LPL/NFKB1/PLIN2/C3/CIDEA/HILPDA/EHD1/PLIN3/NR1H2/SREBF2/OSBPL11/SCARB1/ACACB
SC	GOBP_CELLULAR_RESPONSE_TO_OXYGEN_RADICAL	21	0.578011	2.28915	0.00147275	0.00887008	SOD1/CD36/PRDX1/FBLN5/PRDX2/NQO1/NFE2L2/CCS/SOD3/GLRX2/H19
SC	GOBP_CLEAVAGE_INVOLVED_IN_RRNA_PROCESSING	27	0.551171	2.33909	0.00147275	0.00887008	NHP2/ERI3/NOB1/ABT1/RPP40/RRP36/RPS21/EXOSC7/EXOSC8/BOP1/TBL3/EXOSC9/EXOSC10/EXOSC3/RRS1
SC	GOBP_POSITIVE_REGULATION_OF_SIGNAL_TRANSDUCTION_BY_P53_CLASS_MEDIATOR	27	0.55167	2.3412	0.00147275	0.00887008	UBB/DDX5/ING4/RPS7/RPS15/EEF1E1/CDK5RAP3/RPL26/HEXIM1/RPS20/EIF5A/RPL23/SPRED2/RPL37/MSX1/MYC
SC	GOBP_REGULATION_OF_PROTON_TRANSPORT	21	0.601352	2.38159	0.00147275	0.00887008	PHB2/PARK7/NDUFA4/TMSB4X/PPIF/SLC9A3R1/TWIST1/ACTN4/COX17/DNAJC30/TCIRG1/CHP1/TACO1
SC	GOBP_NEGATIVE_REGULATION_OF_AMYLOID_PRECURSOR_PROTEIN_CATABOLIC_PROCESS	27	0.587445	2.49303	0.00147275	0.00887008	RTN4/RTN3/TMED10/NTRK2/CLU/FLOT2/BIN1/IGF1/SPON1/PICALM/ROCK1/APOE/PIN1/PRNP/RTN1
SC	GOBP_POSITIVE_REGULATION_OF_CHOLESTEROL_EFFLUX	27	0.589035	2.49977	0.00147275	0.00887008	CAV1/NR1H3/CES1/EEPD1/PLTP/GPS2/ADIPOQ/LRP1/PPARG/NR1H2/NFKBIA/APOE/RXRA/TREM2/ABCA1/SIRT1/ZDHHC8
SC	GOBP_CELLULAR_RESPONSE_TO_ARSENIC_CONTAINING_SUBSTANCE	21	0.643273	2.54762	0.00147275	0.00887008	VCP/ATF4/DAXX/GSTO1/ZFAND2A/PPIF/MKNK2/HNRNPA1/ZFAND1/HSF1/SLC38A2/UROS/HMOX1/MYC/ATF3/DDX3X/ZC3H12A
SC	GOBP_NUCLEOSOME_MOBILIZATION	21	0.643482	2.54844	0.00147275	0.00887008	YY1/MCRS1/TFPT/POLE3/UCHL5/BAZ1A/ACTR8/BPTF/ACTL6A/RUVBL2/SMARCA5/ACTR5/NFRKB/INO80B
SC	GOBP_REGULATION_OF_MRNA_3_END_PROCESSING	27	0.613986	2.60566	0.00147275	0.00887008	AHCYL1/NELFE/NCBP2/PAF1/RNF20/YTHDC1/CTR9/RNF40/ZFP36L1/CDK9/SNRPA/SUPT5H/CPSF7/HSF1/ZC3H3/CCNT1/CPSF6/PAPOLA/NUDT21/CDC73
SC	GOBP_CELL_JUNCTION_DISASSEMBLY	21	0.683279	2.70605	0.00147275	0.00887008	IQSEC1/C1QA/ARF6/C3/MAP4K4/C1QB/CDK5/C1QC/TGFBR1/PIK3R1/TREM2/MAPRE2/SNAI2/DUSP3/ITGAM/EPHA4/DKK1
SC	GOBP_NEGATIVE_REGULATION_OF_PROTEIN_LOCALIZATION_TO_CELL_PERIPHERY	27	0.644181	2.7338	0.00147275	0.00887008	PPP2R5A/MRAP/RHOQ/AP2M1/GOPC/TMEM59/CLTC/DAB2/HECTD1/PID1/PICALM/TMBIM1/BCL2L1/PKDCC/PPFIA1/GBP1/ABI3/CSK
SC	GOBP_REGULATION_OF_MITOCHONDRIAL_GENE_EXPRESSION	27	0.650286	2.75971	0.00147275	0.00887008	MALSU1/COA3/UQCC2/RCC1L/TRMT10C/C1QBP/MTG1/MPV17L2/CHCHD10/SHMT2/TSFM/NGRN/LRPPRC/ALKBH1/MRPS27/TACO1/RPUSD3/CDK5RAP1/FASTKD3/METTL4
SC	GOBP_VIRAL_BUDDING	27	0.660826	2.80444	0.00147275	0.00887008	CHMP3/CHMP2A/VPS4A/TSG101/CHMP2B/CHMP1A/CHMP6/VPS37A/VPS28/CHMP5/CHMP4A/CHMP7/PDCD6IP/VTA1/CHMP4B/MVB12A/SNF8
SC	GOBP_PROTEIN_INSERTION_INTO_ER_MEMBRANE	21	0.747487	2.96034	0.00147275	0.00887008	EMC6/WDR83OS/SEC61A1/CAMLG/MMGT1/TRAM1/EMC9/EMC7/UBL4A/BAG6/GET4/EMC8/EMC3/CCDC47/EMC4/SGTA/TRAM2/EMC2
SC	GOBP_PROTEIN_REFOLDING	21	0.753658	2.98478	0.00147275	0.00887008	HSP90AA1/HSPA8/HSPD1/HSPA5/B2M/FKBP1A/HSPA1A/SNRNP70/HSPA14/DNAJA2/BAG5/DNAJB2/FKBP1B/HSPA9/HSPA6/DNAJA4/HSPA13/HSPA1B
SC	GOBP_POSITIVE_REGULATION_OF_TRANSLATIONAL_INITIATION	30	0.542183	2.38194	0.00148148	0.00887008	POLR2G/YTHDF2/CDC123/YTHDF1/DHX29/KHDRBS1/EIF2B5/HABP4/LARP1/DNAJC3/EIF2AK4/NCK1/IMPACT/MTOR/PPP1R15A/UHMK1/YTHDF3/DDX3X
SC	GOBP_NEGATIVE_REGULATION_OF_CYCLIN_DEPENDENT_PROTEIN_SERINE_THREONINE_KINASE_ACTIVITY	30	0.580121	2.54861	0.00148148	0.00887008	CDKN1C/CDKN2B/CDKN2C/FBXO7/CEBPA/PTEN/LATS2/HEXIM2/NR2F2/HEXIM1/CDKN2D/CDK5RAP2/IPO5/CDKN1B/CDKN1A/CASP3/MEN1/TNFAIP3/CDK5RAP1/KAT2B/LATS1/HHEX
SC	GOBP_MITOCHONDRIAL_OUTER_MEMBRANE_PERMEABILIZATION	30	0.609592	2.67808	0.00148148	0.00887008	VDAC2/BOK/BNIP3L/ACAA2/SLC25A5/MUL1/TMEM14A/HSPA1A/BNIP3/RHOT2/CHCHD10/NMT1/MOAP1/RHOT1/BLOC1S2/BID/GZMB/EYA2/ZNF205/SLC35F6
SC	GOBP_REGULATION_OF_ENDOPLASMIC_RETICULUM_STRESS_INDUCED_INTRINSIC_APOPTOTIC_SIGNALING_PATHWAY	30	0.633281	2.78215	0.00148148	0.00887008	TMBIM6/WFS1/BOK/CREB3/DDIT3/XBP1/PARK7/TXNDC12/GRINA/HERPUD1/SERINC3/SYVN1/HSPA1A/BCL2L1/NCK1/ERP29/PTPN1/SIRT1
SC	GOBP_ENDOSOME_TRANSPORT_VIA_MULTIVESICULAR_BODY_SORTING_PATHWAY	30	0.761438	3.34518	0.00148148	0.00887008	VCP/CHMP3/CHMP2A/VPS25/UBXN6/CHMP2B/TMEM50A/RILP/CHMP1A/CHMP6/SORT1/VPS28/CHMP5/CHMP4A/CHMP7/VTA1/CHMP4B/MVB12A/LEPROT/SNF8/STAM/TMEM50B/PTPN23/LYST/LAPTM4B
SC	GOBP_DNA_SYNTHESIS_INVOLVED_IN_DNA_REPAIR	35	0.463628	2.13776	0.0014881	0.00887008	VCP/POLDIP2/PCNA/POLD2/TREX1/REV1/WRNIP1/POLD4/CDKN2D/REV3L/MAD2L2/SPRTN/RCHY1/PRIMPOL/USP10/ZBTB1/POLD3/RFC3/SIRT1
SC	GOBP_NEGATIVE_REGULATION_OF_NIK_NF_KAPPAB_SIGNALING	35	0.463631	2.13777	0.0014881	0.00887008	CPNE1/TMSB4X/LITAF/ADIPOR1/NMI/MKRN2/RELA/PPM1A/IFI35/HDAC7/UACA/TSPAN6/PPM1B/MIR223/DDX3X/C1QTNF3/ZC3H12A
SC	GOBP_NEGATIVE_REGULATION_OF_CELL_MATRIX_ADHESION	35	0.487558	2.2481	0.0014881	0.00887008	ITGB1BP1/CORO1C/HOXA7/APOD/MAP4K4/BCL6/PTEN/DMTN/DLC1/RASA1/MYOC/THBS1/ADAM15/PIK3R1/DUSP22/ACVRL1/FAM107A/PHLDB2/JAG1/MMP14
SC	GOBP_REGULATION_OF_RUFFLE_ASSEMBLY	32	0.521523	2.32631	0.0014881	0.00887008	CAV1/RDX/FAM98A/CORO1C/PFN1/CYFIP1/HRAS/RHOG/PFN2/EPS8/ARHGAP24/NDEL1/KANK1/DEF8/ABI3/EVL/P2RY12/ICAM1
SC	GOBP_POSITIVE_REGULATION_OF_DOUBLE_STRAND_BREAK_REPAIR_VIA_HOMOLOGOUS_RECOMBINATION	35	0.527939	2.43429	0.0014881	0.00887008	MORF4L1/MORF4L2/ACTB/MEAF6/KAT5/VPS72/PARP1/WDR48/DMAP1/MRGBP/ACTR2/RBBP8/MMS19/YEATS4/ACTL6A/ING3/RUVBL2/EPC2/WRAP53
SC	GOBP_POSITIVE_REGULATION_OF_RESPONSE_TO_ENDOPLASMIC_RETICULUM_STRESS	35	0.534604	2.46502	0.0014881	0.00887008	BCAP31/CAV1/BOK/DDIT3/RNF185/XBP1/NFE2L2/HERPUD1/SERINC3/BAG6/TMEM259/UBQLN2/UBQLN1/ATF6/PIK3R1/SGTA/NCK1/PTPN1/SIRT1
SC	GOBP_POSITIVE_REGULATION_OF_UBIQUITIN_PROTEIN_TRANSFERASE_ACTIVITY	32	0.561812	2.50602	0.0014881	0.00887008	UBE2L3/PINK1/SKP1/STUB1/RPS2/UBE2N/PTEN/TOPORS/DCUN1D4/BMI1/FBXW7/PIN1/DCUN1D5/DCUN1D1/ARRDC4/ARRDC3/BTRC/DCUN1D3/CDC14B/AXIN1/MASTL
SC	GOBP_POSITIVE_REGULATION_OF_MRNA_PROCESSING	32	0.574048	2.5606	0.0014881	0.00887008	PRDX6/HSPA8/NCBP2/SNW1/PAF1/CIRBP/THRAP3/NCL/RBM3/SNRNP70/TRA2B/HSF1/SF3B4/TRA2A/RBMX
SC	GOBP_AMYLOID_FIBRIL_FORMATION	32	0.605796	2.70222	0.0014881	0.00887008	PFDN1/CD36/PFDN5/CRYAB/CLU/USP9X/GSN/B2M/FKBP1A/PFDN2/VBP1/PFDN4/SIAH2/FURIN/APOE/APP/RIPK1/SIAH1/BACE1/TREM2
SC	GOBP_ANTIGEN_PROCESSING_AND_PRESENTATION_OF_PEPTIDE_OR_POLYSACCHARIDE_ANTIGEN_VIA_MHC_CLASS_II	32	0.607352	2.70916	0.0014881	0.00887008	CTSF/HLA-DRA/HLA-DRB1/HLA-DMA/B2M/HLA-DPA1/HLA-DPB1/CD74/ARL8B/PYCARD/HLA-DQB1/CTSD/HLA-DMB/CTSL/THBS1/HLA-DRB5/FCER1G/IFI30/HLA-DQA1/TREM2/HLA-DQA2/FCGR2B/LGMN/CTSS/PIKFYVE
SC	GOBP_CELL_REDOX_HOMEOSTASIS	35	0.589165	2.7166	0.0014881	0.00887008	GPX1/PRDX6/APEX1/PRDX1/PRDX4/PRDX5/DDIT3/ERP44/PRDX2/TXN2/NQO1/TXN/NFE2L2/PRDX3/BOLA2B/DLD/EGLN2/BOLA2/GLRX2
SC	GOBP_REGULATION_OF_AUTOPHAGY_OF_MITOCHONDRION	35	0.607782	2.80244	0.0014881	0.00887008	PARL/HAX1/PINK1/BNIP3L/SLC25A5/HTRA2/TSPO/PARK7/VDAC1/FBXO7/SLC25A4/CTTN/BNIP3/FZD5/FBXW7/SREBF2/USP36/USP30/DNM1L/HTT/SREBF1/VPS13D/CSNK2A2/CAMKK2
SC	GOBP_TETRAPYRROLE_BIOSYNTHETIC_PROCESS	33	0.47855	2.16393	0.00149477	0.00887008	PGRMC1/UROD/TMEM14C/TMEM14A/TSPO/NFE2L1/RSAD1/PPOX/ALAS1/SLC25A38/ALAD/TMEM14B/SLC25A39/UROS/SUCLA2/ABCB6/HMBS/COX15
SC	GOBP_POSITIVE_REGULATION_OF_EPITHELIAL_CELL_APOPTOTIC_PROCESS	33	0.497297	2.2487	0.00149477	0.00887008	AKR1C3/GSN/EIF2S1/BAD/CD248/ECSCR/SFRP4/GPER1/H19/FOXO3/THBS1/RGCC/PIAS4/PDCD4/ANO6/CCL2/CD40/JAK2
SC	GOBP_AORTA_MORPHOGENESIS	33	0.498533	2.25429	0.00149477	0.00887008	RBPJ/COL3A1/EFEMP2/ENG/PDGFRB/SOX4/LRP1/SIX1/SEC24B/NPRL3/ACVRL1/HEY1/HES1/NOTCH1/EFNB2/SRF/JAG1
SC	GOBP_MITOCHONDRIAL_OUTER_MEMBRANE_PERMEABILIZATION_INVOLVED_IN_PROGRAMMED_CELL_DEATH	36	0.511078	2.35965	0.00149477	0.00887008	VDAC2/BOK/BNIP3L/ACAA2/SLC25A5/MUL1/TMEM14A/PPIF/HSPA1A/BNIP3/RHOT2/CHCHD10/NMT1/MOAP1/RHOT1/ATF2/BLOC1S2/BID/GZMB/EYA2/ZNF205/SLC35F6
SC	GOBP_ANOIKIS	33	0.534294	2.416	0.00149477	0.00887008	ITGB1/CAV1/NTRK2/TLE1/PTRH2/BRMS1/TFDP1/MAP3K7/BCL2/PDK4/ITGA5/AKT1/MCL1/NOTCH1/IKBKG/MTOR/PIK3CA/ANKRD13C/SNAI2/MYBBP1A
SC	GOBP_INTRA_GOLGI_VESICLE_MEDIATED_TRANSPORT	33	0.534503	2.41694	0.00149477	0.00887008	VTI1B/COPZ1/GABARAPL2/COPG1/COPE/RAB6A/TRAPPC3/COPB1/COPA/NAPA/GOLGA5/COPG2/COPZ2/COG5/RAB6B/COG4/GOSR2
SC	GOBP_POSITIVE_REGULATION_OF_MICROTUBULE_POLYMERIZATION_OR_DEPOLYMERIZATION	36	0.52488	2.42337	0.00149477	0.00887008	MAP1B/RAC1/DRG1/MAPRE1/RPS3/DCTN1/ARL3/ARL2/HSPA1A/CKAP5/SLAIN2/FES/PAK1/CDK5RAP2/AKAP9/CDKN1B/NUMA1/GIT1/ANKRD53/NIN/HSPA1B/STMN2/KATNB1
SC	GOBP_MONOCYTE_DIFFERENTIATION	36	0.528963	2.44223	0.00149477	0.00887008	HOXA7/HLA-DRB1/MYH9/CTNNBIP1/CD74/ZFP36L1/FASN/CSF1R/PPARG/IFI16/CD4/FES/PIR/BMP4/IRF7/CSF1/JUN/ACIN1/MYC/CDK6/MT1G/MED1
SC	GOBP_RESPONSE_TO_FLUID_SHEAR_STRESS	33	0.54148	2.4485	0.00149477	0.00887008	ASS1/NFE2L2/MMP2/MAP2K5/HDAC3/CITED2/PDGFRB/TFPI2/KLF2/PKD2/SREBF2/AKT1/MEF2C/PLEC/ABCA1/KLF4/MTSS1
SC	GOBP_NEGATIVE_REGULATION_OF_PHOSPHATASE_ACTIVITY	36	0.534723	2.46882	0.00149477	0.00887008	BOD1/PPP1R11/CRY2/FKBP1A/TIPRL/PPP1R1B/URI1/LGALS3/GNAI2/BAG4/STYXL1/PPP1R35/ROCK1/PPP1R36/ROCK2/FKBP1B/CHP1/MGAT5/PPP1R15A/RGN/BOD1L1/PTPA
SC	GOBP_CYTOPLASMIC_PATTERN_RECOGNITION_RECEPTOR_SIGNALING_PATHWAY_IN_RESPONSE_TO_VIRUS	33	0.552408	2.49791	0.00149477	0.00887008	PHB2/PHB/PUM1/ANKRD17/C1QBP/RNF135/BIRC2/LSM14A/GPATCH3/IRF7/PUM2/ZCCHC3/TSPAN6/IRF3/IFIH1/BIRC3/RIOK3/NLRX1/DDX58/DDX60/DHX58
SC	GOBP_REGULATION_OF_RESPONSE_TO_REACTIVE_OXYGEN_SPECIES	33	0.56071	2.53545	0.00149477	0.00887008	CD36/PINK1/FBLN5/PARK7/RACK1/TXN/NFE2L2/HEBP2/SESN1/ABL1/H19/FOXO3/SESN2/TRAP1/ENDOG/RIPK1/SESN3/PDE8A
SC	GOBP_PROTEIN_TRANSMEMBRANE_IMPORT_INTO_INTRACELLULAR_ORGANELLE	36	0.552265	2.54981	0.00149477	0.00887008	TIMM23/TOMM20/HSPD1/GRPEL1/DNAJC15/TOMM70/DNAJC19/CHCHD4/PAM16/ROMO1/TOMM7/PEX10/LONP2/PEX16/TIMM17B/DNLZ/PEX14/TOMM40L/TIMM44/TIMM17A/AIFM1/PEX6/PEX7/PEX2/GRPEL2
SC	GOBP_VASCULAR_ASSOCIATED_SMOOTH_MUSCLE_CELL_DIFFERENTIATION	33	0.566688	2.56248	0.00149477	0.00887008	MESP1/EFEMP2/SGCB/ADM/RAMP2/ENG/GPER1/APLNR/NFATC3/PDCD4/EDNRA/HES1/NOTCH1/NFATC1/NFATC2/SRF/PDGFB/GATA6
SC	GOBP_PEROXISOME_ORGANIZATION	33	0.574709	2.59875	0.00149477	0.00887008	PEX19/MFF/ZFAND6/FIS1/HACL1/ACOT8/PEX10/PEX11B/SCP2/PEX11A/LONP2/RAB8B/PEX16/PEX3/PEX11G/ABCD2/DNM1L/PEX14/ABCD3/PEX6/PEX7/PEX2
SC	GOBP_RESPONSE_TO_ARSENIC_CONTAINING_SUBSTANCE	33	0.597674	2.70259	0.00149477	0.00887008	VCP/SERPINF1/ATF4/DAXX/GSTO1/ZFAND2A/PPIF/MKNK2/RBM4/HNRNPA1/ZFAND1/ALAD/SRRT/HSF1/SLC38A2/UROS/CYP1B1/HMOX1/MYC/ATF3/DDX3X/RNF4/ZC3H12A
SC	GOBP_ANTIGEN_PROCESSING_AND_PRESENTATION_OF_EXOGENOUS_PEPTIDE_ANTIGEN	36	0.591989	2.73322	0.00149477	0.00887008	CTSF/HLA-DRA/HLA-DRB1/HLA-E/HLA-DMA/B2M/HLA-DPA1/HLA-A/HLA-DPB1/CD74/HLA-DQB1/CTSD/HLA-DMB/CTSL/HLA-F/HLA-DRB5/FCER1G/LNPEP/IFI30/HLA-DQA1/CLEC4A/MFSD6/HLA-DQA2/FCGR2B/LGMN/CTSS/PIKFYVE/TAP1
SC	GOBP_POSITIVE_REGULATION_OF_ESTABLISHMENT_OF_PROTEIN_LOCALIZATION_TO_MITOCHONDRION	36	0.60952	2.81416	0.00149477	0.00887008	UBE2L3/PDCD5/SH3GLB1/PINK1/UBE2D3/HTRA2/SAE1/UBE2J2/UBL5/TOMM7/HUWE1/BAP1/ABLIM3/NMT1/FZD5/FBXW7/LEPROT/RHOU/SREBF2/USP36/RAC2/ATG13/CSNK2A2/GZMB/RNF31
SC	GOBP_VIRION_ASSEMBLY	36	0.62205	2.87201	0.00149477	0.00887008	CHMP3/CHMP2A/VPS4A/TSG101/CHMP2B/RAB1A/PC/CHMP1A/CHMP6/VPS37A/VPS28/CHMP5/RAB1B/CHMP4A/CHMP7/PDCD6IP/VTA1/CHMP4B/MVB12A/APOE/SNF8/SPCS1/VPS37C
SC	GOBP_NEGATIVE_REGULATION_OF_PROTEIN_LOCALIZATION_TO_MEMBRANE	33	0.642517	2.90537	0.00149477	0.00887008	ITGB1BP1/PPP2R5A/MRAP/RHOQ/AP2M1/GOPC/TMEM59/INPP5K/CLTC/DAB2/HECTD1/PID1/PICALM/TMBIM1/DMTN/BCL2L1/GDI1/PKDCC/PPFIA1/GBP1/ABI3/CSK
SC	GOBP_CARDIAC_EPITHELIAL_TO_MESENCHYMAL_TRANSITION	36	0.662688	3.05964	0.00149477	0.00887008	RTN4/RBPJ/TGFBR2/TGFBR3/TWIST1/ENG/EFNA1/SPRY1/TGFBR1/ADAM15/BMP4/OLFM1/PDCD4/ACVRL1/HEY1/NOTCH1/TMEM100/BMP2/MSX1/SNAI2/ACVR1/HEYL/JAG1
SC	GOBP_REGULATION_OF_INTRINSIC_APOPTOTIC_SIGNALING_PATHWAY_IN_RESPONSE_TO_DNA_DAMAGE	36	0.70588	3.25906	0.00149477	0.00887008	TPT1/CLU/TRIAP1/MIF/TAF9/RPS3/HNRNPK/CD44/CD74/CXCL12/ING2/USP47/KDM1A/BCL2L1/RPL26/TAF9B/SFRP2/BCL2/CDKN2D/PIAS4/TMEM161A/TRIM32/NACC2/SIRT1/SNAI2/BID/CCAR2/ACKR3
SC	GOBP_PROSTANOID_BIOSYNTHETIC_PROCESS	31	0.551037	2.45091	0.00149925	0.00887008	AKR1C3/PTGES3/CBR1/MIF/ANXA1/FABP5/CD74/HPGDS/PNPLA8/PTGES2/PTGDS/AVP/EDN1/SIRT1/PIBF1/PTGES/PLA2G4A/TBXAS1
SC	GOBP_NEGATIVE_REGULATION_OF_PEPTIDYL_SERINE_PHOSPHORYLATION	31	0.561017	2.4953	0.00149925	0.00887008	CAV1/PWP1/GGNBP2/RACK1/INPP5K/PTEN/DMTN/DDIT4/MLXIPL/GADD45A/NCK1/GPD1L
SC	GOBP_NEURON_DEATH_IN_RESPONSE_TO_OXIDATIVE_STRESS	31	0.563965	2.50841	0.00149925	0.00887008	PINK1/ARL6IP5/ATF4/PARK7/RACK1/FBXO7/NONO/PARP1/REST/ENDOG/OXR1/LANCL1/FBXW7/GFER/MCL1/TREM2/CTNNB1/TLR4
SC	GOBP_REGULATION_OF_PROTEIN_EXPORT_FROM_NUCLEUS	31	0.576	2.56194	0.00149925	0.00887008	ANP32B/YWHAE/PARK7/TXN/IFI27/GAS6/BAG3/CAMK1/CDK5/RBM22/PTPN11/PPM1A/EMD/TPR/TCF7L2/RAPGEF3/PRKACA/UHMK1/XPO4/FRAT1
SC	GOBP_CHAPERONE_COFACTOR_DEPENDENT_PROTEIN_REFOLDING	31	0.587268	2.61206	0.00149925	0.00887008	ST13/HSPA8/DNAJB12/PTGES3/HSPA5/DNAJB1/SDF2/CD74/HSPA1A/SDF2L1/HSPE1/HSPA14/HSPH1/HSPA9/HSPA6/TOR2A/BAG1/TOR1B/HSPA13/HSPA1B/TOR1A
SC	GOBP_POSITIVE_REGULATION_OF_CELL_SUBSTRATE_JUNCTION_ORGANIZATION	31	0.609636	2.71155	0.00149925	0.00887008	ITGB1BP1/POLDIP2/RAC1/IQSEC1/S100A10/FERMT2/ARF6/SMAD3/MAP4K4/SFRP1/THY1/ABL1/NRP1/MYOC/ROCK1/PIK3R1/TEK/KDR/MAPRE2/SDC4/COL16A1/DUSP3/LIMS1
SC	GOBP_MODULATION_BY_HOST_OF_VIRAL_PROCESS	31	0.633639	2.81831	0.00149925	0.00887008	PHB/HSPA8/PSMC3/VAPA/CAV2/PPIB/CFL1/IFI27/PC/NUCKS1/STOM/CSF1R/ZBED1/CCNK/EIF2AK4/APOE/FMR1/ZNF502/CCL8/ZC3H12A/LTF/PTX3
SC	GOBP_REGULATION_OF_AEROBIC_RESPIRATION	31	0.640889	2.85056	0.00149925	0.00887008	VCP/COX7A2L/PINK1/ISCU/RHOA/COX7A2/DNAJC15/PARK7/UQCC2/NUPR1/PPIF/COX7A1/ARL2/BNIP3/AK4/MLXIPL/SHMT2
SC	GOBP_TRICARBOXYLIC_ACID_CYCLE	31	0.643725	2.86317	0.00149925	0.00887008	ACO1/IDH3B/SDHAF2/PDHA1/ACO2/MDH2/IDH3G/MDH1/SUCLG1/FH/SDHB/IDH1/SDHA/MRPS36/OGDH/IDH2/SUCLA2/IDH3A/SUCLG2/CS/PDHB/DLAT
SC	GOBP_MITOPHAGY	31	0.643929	2.86408	0.00149925	0.00887008	PHB2/PINK1/OPTN/MFN2/SQSTM1/SLC25A5/HTRA2/VDAC1/MAP1LC3B/TOMM7/SLC25A4/HUWE1/CDC37/ATG4B/ARFIP2/C5orf51/USP30/ATG13/BECN1/VPS13D/ATG4D
SC	GOBP_COPII_COATED_VESICLE_BUDDING	31	0.666956	2.9665	0.00149925	0.00887008	TMED10/PEF1/PREB/TFG/PPP6C/VAPA/SEC13/RAB1A/SAR1A/INSIG1/SEC31A/KLHL12/PDCD6/SEC16A/TMED2/SCAP/CUL3/VAPB/SEC24C/SEC24B
SC	GOBP_MULTIVESICULAR_BODY_ORGANIZATION	31	0.707864	3.14845	0.00149925	0.00887008	CHMP3/CHMP2A/IST1/VPS4A/VPS25/TSG101/CHMP2B/RAB11A/CHMP1A/CHMP6/VPS37A/VPS28/CHMP5/CHMP4A/CHMP7/PDCD6IP/VTA1/CHMP4B/MVB12A/SNF8/STAM/HGS/VPS37C
SC	GOBP_CELL_CELL_SIGNALING_INVOLVED_IN_CARDIAC_CONDUCTION	33	-0.497725	-1.97815	0.00150038	0.00887008	SCN3B/GJC1/SCN1B/NUP155/KCNJ3/CXADR/CACNB2/RNF207/KCNJ5/TRPM4/PKP2/CACNA1D/RYR2/CACNA1G/SCN5A/CACNA1C/SCN10A/KCNA5/KCNN2/HCN4
SC	GOBP_RESPONSE_TO_INTERLEUKIN_4	34	0.478179	2.18522	0.0015015	0.00887008	HSP90AB1/IMPDH2/RPL3/HSPA5/CDK4/XBP1/KEAP1/TUBA1B/FASN/ALAD/MRC1/STAT5B/CORO1A/NFIL3/STAT6
SC	GOBP_FATTY_ACYL_COA_METABOLIC_PROCESS	37	0.474089	2.21355	0.0015015	0.00887008	ACSL1/PPT1/SLC25A1/DGAT1/DGAT2/ELOVL1/NUDT8/ELOVL5/TECR/ACSL3/NUDT7/GCDH/ACSL5/PPT2/ELOVL3/ACSL4/ACOT7/FAR1/HSD17B4
SC	GOBP_RRNA_MODIFICATION	34	0.487161	2.22627	0.0015015	0.00887008	TRMT112/EMG1/NSUN5P2/NHP2/METTL5/NOP10/FTSJ3/TSR3/DKC1/NSUN5/TRMT61B/GAR1/FBL/MRM3/TFB2M/RPUSD3/RPUSD1/MRM2
SC	GOBP_NADP_METABOLIC_PROCESS	37	0.482206	2.25145	0.0015015	0.00887008	PGD/TALDO1/NADK/DCXR/TKT/NQO1/ME1/TP53I3/FMO2/PGLS/DERA/IDH1/PGAM1/IDH2/NUDT17/FMO1/RPE/H6PD/RPIA/NUDT12/G6PD/ALDH1L1/RBKS
SC	GOBP_REGULATION_OF_DNA_DAMAGE_RESPONSE_SIGNAL_TRANSDUCTION_BY_P53_CLASS_MEDIATOR	34	0.493627	2.25582	0.0015015	0.00887008	PTTG1IP/MIF/DDX5/COPS3/PSMD10/SMYD2/ING4/CD44/CD74/EEF1E1/TWIST1/SOX4/KDM1A/RPL26/SPRED2/MSX1/SIRT1/SNAI2
SC	GOBP_POSTREPLICATION_REPAIR	34	0.497531	2.27366	0.0015015	0.00887008	VCP/UBE2V1/POLDIP2/WDR33/PCNA/NSMCE1/POLD2/UBE2N/REV1/UBE2V2/REV3L/MAD2L2/SPRTN/UBE2B/RCHY1/PRIMPOL/USP10/ZBTB1/POLD3/UBE2A
SC	GOBP_BRANCHING_INVOLVED_IN_BLOOD_VESSEL_MORPHOGENESIS	34	0.501304	2.2909	0.0015015	0.00887008	COL4A1/TGFBR2/MDK/ENG/ABL1/NRP1/FKBPL/SFRP2/PLXND1/GNA13/EDNRA/KDR/CTNNB1/EDN1/ACVR1/SRF/SIRT6/NOTCH4
SC	GOBP_MITOCHONDRIAL_FISSION	37	0.491008	2.29255	0.0015015	0.00887008	MFF/PINK1/RALA/FIS1/MUL1/VPS35/INF2/DCN/BNIP3/PPARG/AP3B1/SLC25A46/RALBP1/KDR/DNM1L/MTFR1L/MTFP1/MTFR1/SPIRE1/OPA1/MCU/GDAP1/STAT2
SC	GOBP_MONOUBIQUITINATED_PROTEIN_DEUBIQUITINATION	34	0.521931	2.38517	0.0015015	0.00887008	SF3B5/TAF9/USP16/TAF7/TAF12/USP47/USP22/USP1/BAP1/USP7/TAF10/ENY2/SGF29/KAT2A/SUPT7L/TADA1/ASXL1/TAF6L/ATXN7/SUPT3H
SC	GOBP_POSITIVE_REGULATION_OF_CYCLIN_DEPENDENT_PROTEIN_KINASE_ACTIVITY	34	0.532396	2.43299	0.0015015	0.00887008	HSP90AB1/CKS1B/PSMD10/CCND1/CCND2/MNAT1/CCND3/EGFR/CCNK/PKD2/RGCC/CCNB1/AKT1/CDKN1B/CCNY/CDKN1A/CKS2/STOX1/CCNT1/CCNT2/PDGFB/MAPRE3
SC	GOBP_REGULATION_OF_FIBROBLAST_MIGRATION	34	0.535641	2.44782	0.0015015	0.00887008	ITGB1BP1/ITGB1/CORO1C/RAC1/DDR2/GNA12/AKAP12/ARHGEF7/DMTN/BAG4/HYAL2/THBS1/CYGB/AKT1/ARHGAP4/ACTA2/APPL2/SDC4/APPL1/FGF2
SC	GOBP_MACROPHAGE_CHEMOTAXIS	37	0.528512	2.46766	0.0015015	0.00887008	RARRES2/DDT/MMP28/MIF/CKLF/EDNRB/LGALS3/MDK/CSF1R/C3AR1/SAA1/THBS1/MTUS1/AKIRIN1/CSF1/CCL3/NUP85/CMKLR1/SLAMF8
SC	GOBP_PROTEIN_TARGETING_TO_VACUOLE	37	0.531035	2.47944	0.0015015	0.00887008	HSPA8/RAB7A/CLU/VPS4A/NCOA4/M6PR/WASH3P/SORT1/AP3D1/VPS37A/LAPTM5/LAMP2/AP3B1/SMURF1/HGS/PIK3R4/VPS13D/VPS37C/AP3M1/VPS41/GGA3/SNX16/VPS13A/SCARB2
SC	GOBP_MATURATION_OF_SSU_RRNA_FROM_TRICISTRONIC_RRNA_TRANSCRIPT_SSU_RRNA_5_8S_RRNA_LSU_RRNA	34	0.560941	2.56344	0.0015015	0.00887008	RPS19/NGDN/WDR46/RPS8/ABT1/RPS16/MRPS11/RPS14/GTF2H5/RPP40/RRP36/TSR2/NOL10/RPS21/UTP3/BYSL/TBL3/RRS1/UTP4
SC	GOBP_POSITIVE_REGULATION_OF_RNA_SPLICING	37	0.557717	2.60402	0.0015015	0.00887008	PRDX6/HSPA8/SNW1/CIRBP/THRAP3/NCL/HSPA1A/HNRNPLL/HABP4/RBM3/RBM22/SNRNP70/SETX/TRA2B/SF3B4/SLC38A2/SRSF5/PIK3R1/TRA2A/RBMX/POLR2A/U2AF2
SC	GOBP_MRNA_CIS_SPLICING_VIA_SPLICEOSOME	37	0.56534	2.63961	0.0015015	0.00887008	CWC15/WBP4/NCBP2/SNRPC/RBM17/PRPF40A/CLNS1A/SF3A1/RBM22/SRSF1/DDX23/SNRNP200/WBP11/PRPF4B/SART1/SFSWAP/PSIP1/PRPF39
SC	GOBP_ATP_BIOSYNTHETIC_PROCESS	34	0.579514	2.64832	0.0015015	0.00887008	VCP/DGUOK/STOML2/PINK1/ENO1/ALDOA/NUDT2/TMSB4X/PID1/PARP1/ATP6V0C/MT-ATP6/H19/AK4/MT-CO2/DNAJC30/UQCC3/SLC25A13/MT-ATP8/TREM2/SLC25A12/MYC
SC	GOBP_UBIQUITIN_DEPENDENT_PROTEIN_CATABOLIC_PROCESS_VIA_THE_MULTIVESICULAR_BODY_SORTING_PATHWAY	34	0.609838	2.78689	0.0015015	0.00887008	CHMP3/CHMP2A/VPS4A/VPS25/TSG101/CHMP2B/UBAP1/PLAA/CHMP1A/CHMP6/VPS37A/VPS28/RNF126/CHMP5/CHMP4A/CHMP7/CHMP4B/MVB12A/SNF8/STAM/PTPN23/VPS37C
SC	GOBP_MATURATION_OF_5_8S_RRNA	34	0.612519	2.79914	0.0015015	0.00887008	EIF6/EXOSC4/ERI3/NSA2/FTSJ3/MPHOSPH6/RPF1/LAS1L/ABT1/RPP40/PRKDC/RPS21/EXOSC7/EXOSC8/BOP1/C1D/EXOSC9/EXOSC10/PES1/MAK16/EXOSC3/RRS1
SC	GOBP_NEGATIVE_REGULATION_OF_PROTEIN_DEPHOSPHORYLATION	34	0.637054	2.91127	0.0015015	0.00887008	YWHAB/BOD1/PPP1R11/YWHAE/CRY2/FKBP1A/TIPRL/ARPP19/PPP1R1B/LGALS3/GNAI2/STYXL1/ROCK1/SWAP70/PPP1R8/ROCK2/FKBP1B/MGAT5/PPP1R15A/RGN/BOD1L1/PTPA
SC	GOBP_ARP2_3_COMPLEX_MEDIATED_ACTIN_NUCLEATION	37	0.62879	2.93586	0.0015015	0.00887008	BRK1/WASF2/ARPC1A/ARPC3/ARF1/ARPC4/ARPC5L/CYFIP1/WASH3P/ARPC2/CORO1B/ARFIP1/GMFG/WASF3/WASL/ACTR2/GMFB/ACTR3/ARPC1B/ARFIP2/FCHSD2/TRIM27/ARPC5/JMY/WASF1
SC	GOBP_INNER_MITOCHONDRIAL_MEMBRANE_ORGANIZATION	34	0.647511	2.95905	0.0015015	0.00887008	GHITM/NDUFA13/TIMM13/IMMT/PINK1/TIMM9/MTX1/TOMM70/TMEM11/CHCHD3/TIMM22/ROMO1/TIMM8B/CHCHD6/TIMM10/TIMM10B/SAMM50/CHCHD10/UQCC3/APOO/MTX2/HSPA9/AFG3L2/MYC
SC	GOBP_CYTOCHROME_COMPLEX_ASSEMBLY	34	0.659314	3.01299	0.0015015	0.00887008	UQCRFS1/COX14/HCCS/SURF1/COA3/SMIM20/COA4/UQCC2/COA5/BCS1L/MT-CO3/COA6/PET117/CYBA/COX20/COX17/COX16/UQCC3/PET100/OXA1L/TACO1/C12orf73/COX15
SC	GOBP_MULTIVESICULAR_BODY_SORTING_PATHWAY	37	0.653232	3.04999	0.0015015	0.00887008	VCP/CHMP3/CHMP2A/VPS25/UBXN6/CHMP2B/TMEM50A/RILP/CHMP1A/CHMP6/SORT1/VPS28/CHMP5/CHMP4A/CHMP7/VTA1/CHMP4B/MVB12A/LEPROT/SNF8/UVRAG/STAM/TMEM50B/PTPN23
SC	GOBP_NEGATIVE_REGULATION_OF_PROTEASOMAL_UBIQUITIN_DEPENDENT_PROTEIN_CATABOLIC_PROCESS	34	0.675065	3.08497	0.0015015	0.00887008	HSP90AB1/UBXN1/EIF3H/DDRGK1/PARK7/CAMLG/TAF9/RPL11/UCHL5/WAC/SDCBP/BAG6/USP7/GIPC1/OGT/BAG5/SMARCC1/SGTA/N4BP1/MAP1A/TRIM39/USP14/RYBP/TTC36/MTM1/CCAR2
SC	GOBP_G_PROTEIN_COUPLED_GLUTAMATE_RECEPTOR_SIGNALING_PATHWAY	15	-0.646854	-2.06636	0.00152905	0.00887008	HOMER2/GRM7/GRM6/TRPM1/GRM4/GRM2/GRIK3/GRM1/DAGLB/GRM3/GRM5/DAGLA/GRM8
SC	GOBP_NEUROMUSCULAR_SYNAPTIC_TRANSMISSION	28	-0.507246	-1.92435	0.00152905	0.00887008	CHRNB4/P2RX3/CHRNA1/CHRNA3/ERC2/TSPOAP1/RIMBP2/DTNA/CHAT/CHRNB1/CHRNB2/MYLK2/ERC1/RIMBP3/CHRM1/STAC3/RAPSN/KIF1B/RAB3A/FCHSD1/P2RX2/SLC5A7
SC	GOBP_TRIGLYCERIDE_BIOSYNTHETIC_PROCESS	38	0.46756	2.20247	0.00153139	0.00887008	THRSP/LPL/ACSL1/NR1H3/DGAT1/DGAT2/GPAM/CTDNEP1/C3/NR1H2/PCK1/FBXW7/PCK2/LPIN2/SCARB1/SREBF1/LPGAT1/RGN/GPAT4
SC	GOBP_POSITIVE_REGULATION_OF_INTERFERON_BETA_PRODUCTION	38	0.472071	2.22372	0.00153139	0.00887008	HSP90AA1/FLOT1/TOMM70/RNF135/ZBTB20/PTPN11/ISG15/DHX9/HMGB2/IRF7/POLR3F/RIPK2/TICAM1/IRF3/IFIH1/TLR4/POLR3C/RIOK3/DDX58/DDX3X/DHX58/POLR3B
SC	GOBP_NEGATIVE_REGULATION_OF_PEPTIDE_SECRETION	38	0.487114	2.29459	0.00153139	0.00887008	JAGN1/NDUFAF2/ADRA2A/LEP/UCP2/CD74/SFRP1/PIM3/REST/HADH/INHBB/PTPN11/CRHBP/PPP3CA/PFKL/ACVR1C/KLF7/FKBP1B/SREBF1
SC	GOBP_REGULATION_OF_CELLULAR_EXTRAVASATION	38	0.490103	2.30867	0.00153139	0.00887008	CD99/XG/CD99L2/CXCL12/MDK/THY1/LYVE1/FADD/PDGFD/PLVAP/IL1R1/JAM3/BST1/SELP/CD47/PTGER4/ST3GAL4/BCR/ICAM1/CHST2/CCL21/RIPK3/ELANE/AGER
SC	GOBP_POSITIVE_REGULATION_OF_GLUCOSE_METABOLIC_PROCESS	40	0.456497	2.16819	0.0015674	0.00887008	DGAT2/FOXO1/SORBS1/IGF1/ARPP19/NNMT/WDR5/PPP4R3B/KAT2A/AKT1/GPT/INSR/EPM2AIP1/IGF2/IRS2/RGN/SLC25A12/SIRT1/DYRK2
SC	GOBP_REGULATION_OF_PROTEIN_LOCALIZATION_TO_CELL_SURFACE	40	0.472216	2.24285	0.0015674	0.00887008	HSP90AB1/RANGRF/GOPC/TAX1BP3/COMMD1/ARF6/PICALM/TM9SF4/TYROBP/GBF1/RAB11B/SNX33/LEPROT/AKT1/MAP1A/GPM6B/GPD1L/STX4/CTNNB1/NEDD4L/RAB11FIP5
SC	GOBP_POST_TRANSLATIONAL_PROTEIN_MODIFICATION	40	0.486057	2.30859	0.0015674	0.00887008	UCHL3/RBX1/CRTAP/AGBL5/LCMT1/PPIB/ATG5/FN3KRP/UBE2F/FAM20C/VIPAS39/WIPI2/ATG12/RNF7/UBE2M/UBA3/ATG7/SUMF1/ICMT/RHBDD1/STT3A/STT3B
SC	GOBP_RESPONSE_TO_COPPER_ION	40	0.502856	2.38838	0.0015674	0.00887008	SOD1/PAM/PARK7/NFE2L2/DAXX/SOD3/AQP1/MAP1LC3A/LOXL2/MT-CO1/HSF1/MT1X/APP/MT1F/PRNP/BACE1/BECN1/MT1M/MT2A/MT1E/SNCA/TFRC/MT1DP/MT1A/LCAT/MT1G/CDK1
SC	GOBP_VESICLE_TARGETING	40	0.523811	2.48791	0.0015674	0.00887008	TMED10/YKT6/PEF1/PREB/TFG/PPP6C/SAR1A/ARFGAP3/TBC1D23/KLHL12/PDCD6/SEC16A/GBF1/TMED2/ARFGAP2/CUL3/STARD3/WIPI1/SNAP23/TMED9/PSEN1/TRIP11/SNAP29
SC	GOBP_NUCLEAR_TRANSCRIBED_MRNA_CATABOLIC_PROCESS_NONSENSE_MEDIATED_DECAY	40	0.595295	2.82743	0.0015674	0.00887008	DCP1A/NCBP2/PYM1/ETF1/NBAS/PNRC2/GSPT1/PABPC1/UPF3B/HNRNPAB/UPF2/CASC3/MAGOHB/SMG7/UPF3A/GSPT2/MAGOH/SMG5/RBM8A/SKIV2L/UPF1/CTIF/RNPS1/EXOSC10/DCP1B/EIF3E/SECISBP2
SC	GOBP_NUCLEOSIDE_MONOPHOSPHATE_BIOSYNTHETIC_PROCESS	41	0.467776	2.2428	0.00156986	0.00887008	DGUOK/DUT/ATIC/IMPDH2/DCTD/NUDT2/TK2/APRT/HPRT1/UCK1/CMPK1/ADK/IMPDH1/ADA/UCKL1/PRPS1/PRPS2/UPP1/SHMT1/CDA/ADSL/AMPD2
SC	GOBP_REGULATION_OF_NITRIC_OXIDE_SYNTHASE_ACTIVITY	41	0.484109	2.32111	0.00156986	0.00887008	ATP2B4/CAV1/DDAH2/LEP/NOSIP/CALM3/EGFR/GLA/NPR3/APOE/AKT1/SCARB1/DDAH1/ACVR2A/HTR2B/S100A1/NUS1/DHFR/NOD1/ZDHHC21
SC	GOBP_SEMI_LUNAR_VALVE_DEVELOPMENT	41	0.489686	2.34785	0.00156986	0.00887008	RBPJ/SLIT3/TWIST1/EFNA1/TNFRSF1A/ROCK1/BMP4/ROCK2/EMILIN1/HEY1/NOTCH1/RB1/TNFRSF1B/BMP2/GJA5/NFATC1/SLIT2/SNAI2/NOTCH2/HEYL/BMPR2/JAG1/ELN
SC	GOBP_REGULATION_OF_PROTEIN_AUTOPHOSPHORYLATION	41	0.50574	2.42482	0.00156986	0.00887008	CAV1/CALM1/CALM2/CALM3/TNKS1BP1/NBN/ADIPOQ/ENG/TESK1/GPNMB/PDGFD/RAD50/PPP2R5B/CHP1/IMPACT/PDGFC/RAP2A/ERRFI1/JUN/VEGFC/PTPRC/PDGFB
SC	GOBP_NEGATIVE_REGULATION_OF_CALCIUM_ION_TRANSMEMBRANE_TRANSPORT	41	0.511498	2.45243	0.00156986	0.00887008	C4orf3/CALM1/ADRA2A/SRI/YWHAE/CALM2/GSTO1/FKBP1A/BIN1/VDAC1/CALM3/SESTD1/UBQLN1/GSTM2/REM1/PKD2/TRDN/FKBP1B/ATP1A2/FMR1/PLN/GEM/RRAD/CLIC2
SC	GOBP_REGULATION_OF_TRANSCRIPTION_ELONGATION_FROM_RNA_POLYMERASE_II_PROMOTER	41	0.518584	2.4864	0.00156986	0.00887008	NELFE/LARP7/EAPP/ZMYND11/SUPT4H1/CDK9/HEXIM1/CCNK/HNRNPU/GTF2F1/TCERG1/NELFB/ELL2/EAF2/BRD4/WDR43/LDB1/CTNNB1/EAF1/CCNT1/CBX7/RNF168/NELFCD/AXIN1/SUPT16H/ELL/CDC73
SC	GOBP_SUBSTANTIA_NIGRA_DEVELOPMENT	41	0.539145	2.58498	0.00156986	0.00887008	DYNLL1/YWHAQ/COX6B1/RHOA/MAOB/CALM1/HSPA5/GLUD1/CKB/YWHAE/YWHAH/ACTB/CALM2/NDUFS3/CALM3/MAPKAP1/ZNF148/SEC16A/NDRG2/BASP1/CNP/CDC42/G6PD/FGF2/S100A1
SC	GOBP_MRNA_TRANSCRIPTION	41	0.576728	2.76518	0.00156986	0.00887008	NCBP2/ATF4/NR1H3/DDX5/TAF9/EPAS1/TAF7/TAF12/TAF11/NCOA1/TAF3/PPARG/TAF10/AP3B1/THRB/HSF1/TFCP2/RXRA/TAF13/HIPK3/ZBTB1/SREBF1/STAT3/ATF2/TBP
SC	GOBP_GOLGI_TO_PLASMA_MEMBRANE_PROTEIN_TRANSPORT	41	0.597437	2.86447	0.00156986	0.00887008	VAMP3/RAB10/OPTN/GOLGA4/GOPC/SPTBN1/VAMP5/RACK1/RAB34/GOLGA7/RAB31/GOLPH3/ACSL3/VAMP4/SEC16A/ARFRP1/PKDCC/SYS1/CNST/ATP2C1/MACF1/VAMP2/CSK/GOLPH3L/NSF/GGA3/KIF13A
SC	GOBP_MAINTENANCE_OF_PROTEIN_LOCALIZATION_IN_ORGANELLE	41	0.614142	2.94456	0.00156986	0.00887008	KDELR2/OS9/PINK1/SKP1/RER1/HSPA5/TSPO/PARK7/ARL2BP/TXN/KDELR3/GPAA1/INSIG1/ARL2/CDK5/BBS4/TAF3/HK1/TOPORS/CHCHD10/HNRNPU/SUN2/SUPT7L/SUN1/AKT1/ANKRD13C/KDELR1/CIZ1
SC	GOBP_PROTEIN_PEPTIDYL_PROLYL_ISOMERIZATION	41	0.614701	2.94724	0.00156986	0.00887008	PPIG/PPIH/RANBP2/AIP/CWC27/FKBP3/FKBP2/PPIA/PPIC/FKBP1A/PPIF/PPIB/PPIL1/FKBP9/NKTR/FKBP7/PIN4/PPIE/PPWD1/PIN1/FKBP4/PPIL4/FKBP8/FKBP1B/FKBP15/PPID
SC	GOBP_NEGATIVE_REGULATION_OF_RESPONSE_TO_ENDOPLASMIC_RETICULUM_STRESS	41	0.691078	3.31344	0.00156986	0.00887008	TMBIM6/WFS1/UBXN1/HSPA5/CREB3/CLU/NR1H3/DDRGK1/XBP1/PARK7/RACK1/TXNDC12/GRINA/HERPUD1/SYVN1/HSPA1A/UFL1/BFAR/DNAJB9/BCL2L1/NR1H2/SGTA/AQP11/NCK1/USP14/PTPN1/PPP1R15A/LPCAT3/OPA1/ALOX5/USP25
SC	GOBP_HISTONE_DEUBIQUITINATION	39	0.48924	2.30189	0.00158228	0.00887008	SF3B5/TAF9/USP16/TAF7/TAF12/SART3/USP22/BAP1/USP7/TAF10/ENY2/SGF29/KAT2A/SUPT7L/USP36/BRCC3/TADA1/ASXL1/TAF6L/ATXN7/USP3/SUPT3H
SC	GOBP_REGULATION_OF_MACROPHAGE_MIGRATION	39	0.513078	2.41405	0.00158228	0.00887008	RARRES2/DDT/CD81/MMP28/MIF/MDK/CSF1R/C3AR1/THBS1/CD9/MTUS1/AKIRIN1/CSF1/CCL3/EMILIN1/CMKLR1/SLAMF8/TREM2/CD200/P2RY12
SC	GOBP_CYTOKINETIC_PROCESS	39	0.530096	2.49412	0.00158228	0.00887008	CHMP3/CHMP2A/ANXA11/RHOA/KLHDC8B/SNX9/ARF1/VPS4A/CHMP2B/MYH9/CHMP1A/CHMP6/CHMP5/CHMP4A/CHMP7/PDCD6IP/CHMP4B/SNX33/BIN3/PLEC/SNX18
SC	GOBP_REGULATION_OF_NECROTIC_CELL_DEATH	39	0.54333	2.55639	0.00158228	0.00887008	CAV1/BOK/NOL3/TSPO/ASAH1/RBCK1/NUPR1/PPIF/SLC25A4/HEBP2/BIRC2/BNIP3/FADD/ATG9A/YBX3/MT-CO2/OGT/RIPK1/PELI1/BIRC3/ARHGEF2/MIR223/RIPK3
SC	GOBP_REGULATION_OF_ACTIN_CYTOSKELETON_REORGANIZATION	39	0.557562	2.62335	0.00158228	0.00887008	HAX1/PHPT1/ARHGDIB/HRAS/MDK/ARHGDIA/ABL1/CSF1R/CDK5/GMFG/TJP1/NRP1/ESAM/HCLS1/FES/RAPGEF3/ABI3/TEK/DAPK3/CDC42/NOTCH2/PDGFRA
SC	GOBP_DE_NOVO_PROTEIN_FOLDING	39	0.576033	2.71026	0.00158228	0.00887008	ST13/HSPA8/DNAJB12/PTGES3/HSPD1/HSPA5/DNAJB1/CHCHD4/FKBP1A/SDF2/CD74/HSPA1A/SDF2L1/HSPE1/HSPA14/CCT2/HSPH1/FKBP1B/HSPA9/HSPA6/TOR2A/BAG1/TOR1B/HSPA13/HSPA1B/TOR1A
SC	GOBP_REGULATION_OF_SPINDLE_ORGANIZATION	44	0.476405	2.33035	0.0015873	0.00887008	CHMP3/CHMP2A/DRG1/CHMP2B/PARP3/DCTN1/CLTC/CHMP1A/CHMP6/HSPA1A/RAE1/EML3/CHMP5/CHMP4A/CHMP7/HNRNPU/PDCD6IP/TPR/CHMP4B/MAP9
SC	GOBP_THIOESTER_BIOSYNTHETIC_PROCESS	44	0.486397	2.37922	0.0015873	0.00887008	ACSS2/PDHA1/ACSL1/PPT1/PPCS/SLC25A1/MPC2/ELOVL1/PDK2/ELOVL5/DLD/ACLY/TECR/ACSL3/ACAT1/GCDH/PDK4/ACSL5/PPT2/ELOVL3/ACSL4/PDHB/DLAT/ACACB/SNCA
SC	GOBP_POSITIVE_REGULATION_OF_TOR_SIGNALING	44	0.486819	2.38129	0.0015873	0.00887008	LAMTOR4/RRAGA/LAMTOR2/PIH1D1/LAMTOR1/LEP/SEC13/LAMTOR5/RHEB/OTUD5/WAC/GOLPH3/GAS6/HDAC3/RRAGD/MLST8/CTNS/RRAGB/GPR137B/RRAGC/MIOS/KLHL22/TREM2/PIK3CA/TELO2/FNIP1/LAMTOR3/WDR24
SC	GOBP_POSITIVE_REGULATION_OF_MEMBRANE_PERMEABILITY	44	0.488289	2.38848	0.0015873	0.00887008	VDAC2/BOK/BNIP3L/ACAA2/SLC25A5/MUL1/TMEM14A/PPIF/HEBP2/HSPA1A/BNIP3/RHOT2/LAPTM5/CHCHD10/NMT1/JAM3/MOAP1/RHOT1/ATF2/BLOC1S2/BID/GZMB/EYA2/ZNF205/SLC35F6
SC	GOBP_PROTEIN_LOCALIZATION_TO_LYSOSOME	44	0.49022	2.39793	0.0015873	0.00887008	RTN4/LAMTOR4/CD81/HSPA8/RAB7A/CLU/VPS4A/NCOA4/LAMTOR5/M6PR/WASH3P/MFSD1/SORT1/AP3D1/LAPTM5/LAMP2/AP3B1/GPR137B/KPTN/ROCK2/SH3BP4/HGS/GLMP/AP3M1/GGA3/SNX16/SCARB2
SC	GOBP_REGULATION_OF_ENDOTHELIAL_CELL_DIFFERENTIATION	44	0.492674	2.40993	0.0015873	0.00887008	BTG1/ADD1/VCL/CLDN5/CDH5/TNFRSF1A/PPP1R12A/ID1/ROCK1/VEZF1/ZEB1/BMP4/ROCK2/ACVRL1/BMP6/ETV2/NOTCH1/ATOH8/CTNNB1/TMEM100/JAG1/FOXJ2/NOTCH4/APOLD1
SC	GOBP_DEOXYRIBOSE_PHOSPHATE_METABOLIC_PROCESS	44	0.496334	2.42783	0.0015873	0.00887008	DGUOK/DUT/DCTD/DCTPP1/GUK1/NEIL2/NT5C/NTHL1/MBD4/DERA/ADK/UNG/TYMP/ADA/NUDT18/SMUG1/TBPL1/DTYMK/RRM1/NUDT16/UPP1/SHMT1/PGM2/TDG/PNP
SC	GOBP_GLUCAN_BIOSYNTHETIC_PROCESS	44	0.51573	2.52271	0.0015873	0.00887008	UGP2/GYG2/PTGES3/GBE1/INPP5K/SORBS1/IGF1/ACADM/PPP1CA/PPP1CB/GYS1/AGL/AKT1/INSR/EPM2AIP1/IGF2/GYG1/IRS2/NR1D1/DYRK2/PPP1R3C
SC	GOBP_RNA_POLYADENYLATION	44	0.571655	2.79627	0.0015873	0.00887008	AHCYL1/NELFE/NCBP2/WDR33/PAF1/RNF20/CPSF3/FIP1L1/PABPC1/YTHDC1/CTR9/RNF40/SSU72/CDK9/SNRPA/SUPT5H/CPSF7/HSF1/CPSF1/CLP1/TUT1/CSTF2/APP/ZC3H3/SCAF8/GRSF1
SC	GOBP_NEGATIVE_REGULATION_OF_OXIDATIVE_STRESS_INDUCED_CELL_DEATH	44	0.577992	2.82726	0.0015873	0.00887008	GPX1/PINK1/ATF4/HTRA2/FYN/NOL3/HSPB1/PARK7/RACK1/TXN/NFE2L2/PPIA/FBXO7/NONO/REST/TRAP1/BAG5/OXR1/GFER/AKT1/NME5/CTNNB1/SIRT1/PDE8A
SC	GOBP_RUFFLE_ASSEMBLY	44	0.597192	2.92118	0.0015873	0.00887008	CAV1/RDX/FAM98A/CORO1C/RAC1/PFN1/INPP5K/CYFIP1/AIF1/HRAS/RHOG/PFN2/EPS8/ARF6/ARHGAP24/NDEL1/BAG4/KANK1/SNX10/AIF1L/DEF8/DBNL/CSPG4/ABI3/INPPL1/EVL/P2RY12
SC	GOBP_REGULATION_OF_RELEASE_OF_CYTOCHROME_C_FROM_MITOCHONDRIA	44	0.609496	2.98137	0.0015873	0.00887008	PARL/GPX1/GHITM/PDCD5/MFF/PINK1/CLU/TRIAP1/NOL3/PRELID1/BAD/FAM162A/PSMD10/LMNA/PPIF/IGF1/PYCARD/BNIP3/GPER1/CIDEB/BCL2L1/TNFSF10/AVP/MOAP1/AKT1/DNM1L/BID/MMP9/BCL2L2/PLAUR/OPA1
SC	GOBP_INTRINSIC_APOPTOTIC_SIGNALING_PATHWAY_IN_RESPONSE_TO_OXIDATIVE_STRESS	44	0.672222	3.28819	0.0015873	0.00887008	SOD1/GPX1/PINK1/ZNF622/ARL6IP5/HTRA2/P4HB/NOL3/HSPB1/PARK7/PDCD10/NFE2L2/PPIA/NONO/PARP1/STK24/STK25/SFPQ/UBQLN1/BCL2/TRAP1/BAG5/FBXW7/AKT1/MCL1/CYP1B1/NME5/TREM2/SIRT1/MAP3K5/JAK2/DIABLO/GSKIP/PRKCD
SC	GOBP_CELLULAR_RESPONSE_TO_GLUCOSE_STARVATION	48	0.446914	2.23209	0.00159744	0.00887008	SH3GLB1/HSPA5/ATF4/XBP1/NFE2L2/MTMR3/SIK2/HNRNPA1/SESN1/PRKAG1/FOXO3/IFI16/SESN2/BCL2/KPTN/SESN3/NUAK1/IMPACT/UPP1/BECN1/ITFG2/SIRT1/PIK3R4/MYBBP1A/RRP8/SUV39H1
SC	GOBP_FACE_DEVELOPMENT	48	0.479335	2.39401	0.00159744	0.00887008	MKKS/ASPH/MMP2/ARID5B/NIPBL/RRAS/CLDN5/BBS4/PTPN11/ANKRD11/COL1A1/MAP2K1/EDNRA/ZFAND5/ALDH1A3/RAB3GAP1/MSX1/SKI/TIPARP/SRF/CSRNP1/PDGFRA/RARA/HOXB3/RARG
SC	GOBP_HISTONE_UBIQUITINATION	48	0.513697	2.56563	0.00159744	0.00887008	SKP1/PAF1/TRIP12/RNF20/PARK7/WAC/UBE2N/RING1/CTR9/RNF40/HUWE1/USP22/PCGF3/CDK9/KDM1A/CUL4B/UBE2E1/BMI1/PCGF5/PCGF1/UBE2B/WDR70/RYBP/UBE2A/TRIM37
SC	GOBP_REGULATION_OF_CELLULAR_RESPIRATION	48	0.530266	2.64838	0.00159744	0.00887008	VCP/COX7A2L/PINK1/ISCU/RHOA/COX7A2/DNAJC15/CISD1/PRELID1/PARK7/UQCC2/NUPR1/PPIF/TREX1/COX7A1/ARL2/IL10RB/BNIP3/AK4/MLXIPL/SHMT2/TRAP1/NOA1
SC	GOBP_REGULATION_OF_ESTABLISHMENT_OF_PROTEIN_LOCALIZATION_TO_MITOCHONDRION	48	0.632339	3.15818	0.00159744	0.00887008	UBE2L3/PARL/PDCD5/HAX1/SH3GLB1/PINK1/UBE2D3/BNIP3L/HTRA2/SAE1/UBE2J2/UBL5/DNAJA1/TOMM7/LMAN1/HUWE1/BAG3/BAG4/BAP1/ABLIM3/NMT1/FZD5/FBXW7/LEPROT/RHOU/SREBF2/USP36/RAC2/ATG13/SREBF1/CSNK2A2/GZMB/RNF31
SC	GOBP_NCRNA_TRANSCRIPTION	51	0.430033	2.18849	0.0016	0.00887008	GTF3C6/LARP7/PWP1/GTF3A/PIH1D1/ANG/POLR2L/ATRX/DEDD/MEPCE/SNAPC5/NCL/POLR1E/SNAPC2/ELL2/ZNF143/ICE1/MTOR/NIFK/NOL11/CDK7/SPIN1/USPL1/GTF3C5/GTF3C1/GTF3C3
SC	GOBP_REGULATION_OF_LAMELLIPODIUM_ORGANIZATION	51	0.447022	2.27495	0.0016	0.00887008	BRK1/CORO1C/WASF2/RAC1/CAPZB/ENPP2/CYFIP1/ARPC2/CD44/CORO1B/ARHGEF7/TWF2/DMTN/KANK1/TWF1/ACTR2/ACTR3/AKIRIN1/PIK3R1/BIN3/ABI3/RAC2/MTOR/PIK3CA/CDC42/SLIT2
SC	GOBP_POSITIVE_REGULATION_OF_TELOMERE_MAINTENANCE	51	0.46741	2.3787	0.0016	0.00887008	CCT5/TCP1/XRCC5/CCT7/CCT8/CCT6A/CCT4/HNRNPD/ATRX/GNL3/CCT3/HNRNPA1/NBN/DKC1/CCT2/NABP2/HNRNPA2B1/ERCC1/ACD/PNKP/RAD50/TNKS2/NEK7/CTNNB1/SLX1A/PPP1R10/HMBOX1/SIRT6/MAP3K4
SC	GOBP_POSITIVE_REGULATION_OF_EPITHELIAL_TO_MESENCHYMAL_TRANSITION	51	0.499635	2.54271	0.0016	0.00887008	GLIPR2/FERMT2/DAB2/TGFBR2/SDCBP/SMAD3/TWIST1/MDK/ENG/LOXL2/WWTR1/BAMBI/TCF7L2/TGFBR1/RGCC/COL1A1/BMP4/OLFM1/TGFB1I1/NOTCH1/CTNNB1/MTOR/BMP2/ZNF703/ACVR1/JAG1
SC	GOBP_VIRAL_TRANSCRIPTION	51	0.505707	2.5736	0.0016	0.00887008	LARP7/SNW1/PSMC3/INPP5K/IFITM3/MDFIC/NUCKS1/TAF11/RSF1/REST/CDK9/DHX9/HEXIM1/GTF2B/TARDBP/USF2/SP1/TRIM32/MID2/TRIM21/TRIM27/RRP1B/CCL3/CCL4/JUN/CCNT1/ZFP36/CHD1/CCNT2/UBP1/TRIM13/HDAC1
SC	GOBP_AMYLOID_BETA_FORMATION	51	0.524076	2.66709	0.0016	0.00887008	RTN4/RTN3/TMED10/NTRK2/CLU/BIN1/IGF1/SPON1/PICALM/NCSTN/EFNA1/APH1B/PSENEN/PSEN2/RELA/IFNGR1/SP1/ROCK1/APOE/PIN1/ROCK2/PRNP/RTN1/APH1A/BACE1/CASP3
SC	GOBP_RETROGRADE_VESICLE_MEDIATED_TRANSPORT_GOLGI_TO_ENDOPLASMIC_RETICULUM	51	0.683762	3.47975	0.0016	0.00887008	KDELR2/ARF4/TMED10/RER1/ATP9A/LMAN2/ARF3/ARF5/COPZ1/TMEM115/COPE/NBAS/BET1L/KDELR3/PITPNB/SCYL1/RAB6A/STX18/COPA/GOLPH3/PLPP3/COPG2/ARCN1/COPZ2/GBF1/ERGIC3/BNIP1/BICD2/UVRAG/RAB6B/COG4/HTT/ERGIC2/USE1/GOLPH3L/KDELR1
SC	GOBP_MITOCHONDRIAL_ELECTRON_TRANSPORT_NADH_TO_UBIQUINONE	51	0.797045	4.05626	0.0016	0.00887008	NDUFAB1/NDUFA2/NDUFB8/NDUFB7/NDUFS5/NDUFV2/PINK1/ISCU/NDUFS6/NDUFA8/NDUFB9/NDUFV1/NDUFB4/NDUFA6/NDUFB6/NDUFA10/NDUFC1/DNAJC15/PARK7/NDUFB10/NDUFS2/NDUFA1/NDUFS4/NDUFC2/NDUFA4/NDUFS8/COQ9/DLD/NDUFB2/NDUFS3/NDUFC2-KCTD14/MT-ND1/NDUFA3/MT-ND4L/MT-ND4/NDUFS7/NDUFA7/NDUFB1/NDUFAF1/MT-ND2/NDUFB3/NDUFA5/MT-ND5/MT-ND3/MT-ND6/NDUFB5/SNCA/NDUFA9
SC	GOBP_PURINE_CONTAINING_COMPOUND_CATABOLIC_PROCESS	49	0.43215	2.1743	0.00160256	0.00887008	HINT1/ITPA/DNPH1/NT5C/NUDT8/HPRT1/ACAT1/NUDT1/ADA/NUDT7/PDE2A/NUDT18/PRTFDC1/PDE8B/NT5E/ENPP4/ACOT7/NUDT3/NUDT16/PDE4A/PDE8A
SC	GOBP_MACROPHAGE_DIFFERENTIATION	49	0.455242	2.29048	0.00160256	0.00887008	HLA-DRB1/EIF2AK1/CEBPA/PARP1/ADIPOQ/CSF1R/FADD/C1QC/GBA/HSF1/HCLS1/CD4/APP/ID2/BMP4/RIPK1/TRIB1/CSF1/RB1/SIRT1/CDC42/MMP9/MIR223/TSPAN2
SC	GOBP_PEPTIDYL_CYSTEINE_MODIFICATION	49	0.464523	2.33718	0.00160256	0.00887008	ATP2B4/ADH5/PARK7/CHCHD4/TXN/SNTA1/ZDHHC3/GAPDH/GOLGA7/RAB6A/PRDX3/ZDHHC12/ZDHHC4/ZDHHC6/ZDHHC7/ZDHHC9/OXR1/ZDHHC2/ZDHHC1/ZDHHC18/CLIP3/HMBS/S100A9/ZDHHC8/S100A8
SC	GOBP_REGULATION_OF_EXTRACELLULAR_MATRIX_ORGANIZATION	49	0.46548	2.34199	0.00160256	0.00887008	DDR2/EFEMP2/CST3/AEBP1/SMAD3/ABL1/IER3IP1/LRP1/TNFRSF1A/COLGALT1/TNXB/RGCC/PHLDB1/CHADL/ANTXR1/EMILIN1/NOTCH1/RB1/TNFRSF1B/BMP2/DAG1/RIC1/PHLDB2/AGT/DDR1/TCF15/FAP/DPP4/FSCN1/CLASP1/IL6
SC	GOBP_TRANSLATIONAL_ELONGATION	49	0.491797	2.4744	0.00160256	0.00887008	EEF1B2/EEF1A1/EEF1G/TUFM/EEF1D/NEMF/RACK1/USP16/DPH3/RPLP1/EEF2/RPLP2/SRP9/DPH2/ASCC2/EEFSEC/EIF5A/DPH5/TSFM/ALKBH1/EFL1/SECISBP2L/ABTB1/SECISBP2/DPH7/HBS1L/LTN1
SC	GOBP_PROSTANOID_METABOLIC_PROCESS	49	0.496142	2.49626	0.00160256	0.00887008	AKR1C3/PTGES3/AKR1C2/GSTP1/CBR1/MIF/AKR1C1/ANXA1/FABP5/CD74/PLAA/HPGDS/PNPLA8/TNFRSF1A/PTGES2/PTGDS/AVP/CES2/ACOX1/EDN1/SIRT1/HPGD/PIBF1/PTGES/GSTM1/PLA2G4A
SC	GOBP_REGULATION_OF_AMYLOID_PRECURSOR_PROTEIN_CATABOLIC_PROCESS	49	0.509355	2.56274	0.00160256	0.00887008	RTN4/RTN3/TMED10/NTRK2/CLU/FLOT2/FKBP1A/BIN1/IGF1/SPON1/PICALM/EFNA1/RELA/IFNGR1/RANBP9/SP1/ROCK1/APOE/PIN1/ROCK2/PRNP/RTN1
SC	GOBP_ACTIN_NUCLEATION	49	0.518782	2.61017	0.00160256	0.00887008	BRK1/WASF2/ARPC1A/ARPC3/ARF1/GSN/ARPC4/ARPC5L/CYFIP1/WASH3P/ARPC2/CORO1B/ARFIP1/GMFG/LMOD1/WASF3/WASL/ACTR2/GMFB/ACTR3/CORO1A/ARPC1B/ARFIP2/FCHSD2/TRIM27/EVL/ARPC5/JMY/SPIRE1/WASF1
SC	GOBP_POSITIVE_REGULATION_OF_EXTRINSIC_APOPTOTIC_SIGNALING_PATHWAY	49	0.621168	3.12531	0.00160256	0.00887008	CTNNA1/CAV1/PPP2R1B/PEA15/HTRA2/TIMP3/PDIA3/PPP2R1A/RBCK1/SRPX/G0S2/PPP1CA/PYCARD/SFRP1/PTEN/GPER1/FADD/TNFSF12/ITM2C/HYAL2/THBS1/TNFSF10/WWOX/RIPK1/TNFRSF12A/AGT/PTPRC/BID/DEDD2/ATF3/TRAF2
SC	GOBP_APOPTOTIC_CELL_CLEARANCE	52	0.449864	2.30452	0.00160514	0.00887008	CD36/HMGB1/TXNDC5/RAC1/NR1H3/ANXA1/RHOG/TREX1/C3/GAS6/LRP1/RAB14/TYROBP/THBS1/ITGAV/AXL/RHOBTB1/XKR8/MARCO/SCARB1/RAC2/TREM2/BECN1/PEAR1/MFGE8/CCL2/RARA
SC	GOBP_INTRACELLULAR_ESTROGEN_RECEPTOR_SIGNALING_PATHWAY	52	0.467133	2.39299	0.00160514	0.00887008	PHB2/UFSP2/RBFOX2/DDX5/DDRGK1/NCOA4/DDX17/UBA5/TAF7/AR/EGLN2/PARP1/WBP2/UFL1/SAFB/DDX54/YAP1/PAGR1/PAK1/UFM1/CNOT2/CNOT1/VPS18
SC	GOBP_MACROPHAGE_MIGRATION	52	0.467772	2.39626	0.00160514	0.00887008	RARRES2/DDT/CD81/MMP28/MIF/CKLF/EDNRB/LGALS3/MDK/CSF1R/C3AR1/SAA1/THBS1/CD9/MTUS1/AKIRIN1/CSF1/CCL3/EMILIN1/NUP85/CMKLR1/SLAMF8/TREM2/CD200/P2RY12/CCL2
SC	GOBP_POSITIVE_REGULATION_OF_PROTEIN_DEPHOSPHORYLATION	46	0.520129	2.5664	0.00160514	0.00887008	HSP90AB1/PPP2R5A/PINK1/PPP1R7/CALM1/GNA12/CAMTA1/CALM2/SMPD1/PPIA/CALM3/PDGFRB/DLC1/PTBP1/GBA/CDH5/PPP1R12A/PPP2R5D/SLC39A10/PIN1/MTOR/NSMF/PPP1R15A/PTPRC/PTPA/JAK2/CD300A/ITGA1/LILRB2/PRKCD
SC	GOBP_RESPONSE_TO_EPIDERMAL_GROWTH_FACTOR	46	0.520996	2.57069	0.00160514	0.00887008	EEF1A1/INPP5K/DAB2/MCM7/NCL/IQGAP1/ZFP36L1/EGFR/ZFP36L2/BAG4/PTPN11/TPR/ID1/STAT5B/COL1A1/DUSP22/AKT1/ERRFI1/BECN1/PDE8A/SNAI2/MYC/ZFP36/DUSP3/DAB2IP/MAPK3/FOXC1/MED1/PPP1R9B
SC	GOBP_NEGATIVE_REGULATION_OF_COLD_INDUCED_THERMOGENESIS	46	0.524053	2.58577	0.00160514	0.00887008	RBPJ/NRDC/ACOT13/ATF4/DDIT3/NR1H3/TFE3/ALDH1A1/RHEB/CIDEA/ADIPOQ/ADAMTS5/IP6K1/ABHD6/NPR3/NOVA1/NR1H2/ID1/HOXC10/LNPEP/PLCL2/NOTCH1/RB1/TLE3/ZNF423/NR1D1/TLR4/ARRDC3
SC	GOBP_TRANSCRIPTION_BY_RNA_POLYMERASE_III	52	0.516873	2.64778	0.00160514	0.00887008	POLR3GL/GTF3C6/PRDX5/GTF3A/MAF1/POLR2L/SF3B1/AR/SNAPC5/CEBPA/POLR3H/DEK/BAZ1B/SNAPC2/ZNF76/BRF2/POLR2K/IVNS1ABP/DDX21/POLR3F/ZNF143/ICE1/MTOR/TBP/BDP1/POLR3C/MYBBP1A/GTF3C5/SMARCA5/GTF3C1/GTF3C3
SC	GOBP_REGULATION_OF_DNA_TEMPLATED_TRANSCRIPTION_IN_RESPONSE_TO_STRESS	52	0.517191	2.64941	0.00160514	0.00887008	TMBIM6/RBPJ/HSPA5/ATF4/DDIT3/DNAJB1/NFE2L2/EPAS1/HSPA1A/CITED2/BAG3/ATF6/RELA/GCN1/HSF1/SESN2/CEBPB/KLF2/BCLAF1/CHD6/NCK1/IMPACT/NOTCH1/STOX1/JUN/HMOX1/EGR1/ATF3
SC	GOBP_ANDROGEN_RECEPTOR_SIGNALING_PATHWAY	46	0.553555	2.73133	0.00160514	0.00887008	PHB/RHOA/PLPP1/PMEPA1/PRMT2/DDX5/RWDD1/PARK7/DAXX/RHOXF1/DDX17/DAB2/AR/SFRP1/ZMIZ1/KDM1A/UBE3A/FKBP4/ZBTB7A/SIRT1/RNF6/NCOR2/HEYL/RNF14/HDAC1/NCOR1
SC	GOBP_NEGATIVE_REGULATION_OF_DEPHOSPHORYLATION	46	0.58939	2.90815	0.00160514	0.00887008	YWHAB/BOD1/PPP1R11/YWHAE/CRY2/INPP5K/FKBP1A/TIPRL/ARPP19/PPP1R1B/URI1/LGALS3/IQGAP1/GNAI2/BAG4/STYXL1/PPP1R35/ROCK1/SWAP70/PPP1R36/PPP1R8/ROCK2/FKBP1B/CHP1/MGAT5/PPP1R15A/RGN/BOD1L1/PTPA
SC	GOBP_INTRACELLULAR_PROTEIN_TRANSMEMBRANE_TRANSPORT	52	0.593036	3.03795	0.00160514	0.00887008	SEC61B/TIMM23/TOMM20/HSPD1/GRPEL1/HSPA5/DNAJC15/SEC61A1/SEC62/TOMM70/DNAJC19/CHCHD4/SRP54/PAM16/ZFAND2B/TRAM1/ROMO1/SEC61G/TOMM7/PEX10/SEC63/LONP2/PEX16/TIMM17B/DNLZ/PEX14/TRAM2/TOMM40L/TIMM44/BCR/TIMM17A/AIFM1/PEX6/PEX7/PEX2
SC	GOBP_NEGATIVE_REGULATION_OF_PROTEASOMAL_PROTEIN_CATABOLIC_PROCESS	46	0.618788	3.05321	0.00160514	0.00887008	HSP90AB1/UBXN1/EIF3H/DDRGK1/PSMF1/GABARAPL2/PARK7/CAMLG/TAF9/RPL11/UCHL5/WAC/F8A1/SDCBP/BAG6/ALAD/USP7/GIPC1/OGT/BAG5/SMARCC1/SGTA/AQP11/N4BP1/MAP1A/TRIM39/USP14/RYBP/TTC36/MTM1/F8A3/CCAR2/USP19/USP25
SC	GOBP_SPLICEOSOMAL_SNRNP_ASSEMBLY	46	0.636955	3.14284	0.00160514	0.00887008	STRAP/SNRPC/PRPF31/SNRPD2/PRPF6/SNRPG/SNRPE/CLNS1A/LSM4/SNRPB/LSM2/CD2BP2/GEMIN8/SRSF10/AAR2/SART3/PRMT5/COIL/GEMIN7/SNRPD3/SNRPF/SART1/GEMIN5
SC	GOBP_TORC1_SIGNALING	43	0.451102	2.19198	0.00160772	0.00887008	RRAGA/PIH1D1/LAMTOR5/OTUD5/WAC/RRAGD/SESN1/MLST8/LARP1/CTNS/SESN2/RRAGB/GPR137B/KPTN/NPRL2/SESN3/NPRL3/DEPTOR/RRAGC/MIOS/KLHL22/MTOR/ITFG2/TELO2/BMT2/C9orf72
SC	GOBP_BLASTOCYST_FORMATION	43	0.457136	2.2213	0.00160772	0.00887008	RTN4/MFN2/SF3B6/CTR9/CITED2/PTPN18/WDR74/ADA/MFNG/FURIN/YAP1/TM4SF1/BYSL/CUL3/SOX17/CNOT2/ACTL6A/GABPA/JUNB/CNOT1/SRF/NLE1/RRP7A/TEAD4
SC	GOBP_PROGRAMMED_NECROTIC_CELL_DEATH	43	0.457863	2.22484	0.00160772	0.00887008	CAV1/BOK/PYGL/ALKBH7/ASAH1/RBCK1/ITPK1/NUPR1/PPIF/SLC25A4/BIRC2/FADD/YBX3/OGT/RIPK1/PELI1/DNM1L/IRF3/BIRC3/MAP3K5/ARHGEF2/RIPK3/TRAF2
SC	GOBP_GLIAL_CELL_PROLIFERATION	43	0.481839	2.34134	0.00160772	0.00887008	CLU/CDKN2B/TSPO/UFL1/SOX4/CSF1R/GBA/CERS2/LGI4/PPP1CC/CSF1/RNF10/PENK/DICER1/HES1/NOTCH1/TREM2/SKI/MYC/AREG
SC	GOBP_REGULATION_OF_HISTONE_DEACETYLATION	43	0.485531	2.35928	0.00160772	0.00887008	C6orf89/PINK1/KDM5A/SAP30BP/ING2/BCL6/NIPBL/CTBP1/WDR5/KAT14/SGF29/KAT2A/MBIP/APLNR/CAMK2D/SREBF1/SIRT1/SKI/AKAP8L/PRKD1/ZBTB7B/RRP8/SUV39H1
SC	GOBP_POSITIVE_REGULATION_OF_PATTERN_RECOGNITION_RECEPTOR_SIGNALING_PATHWAY	43	0.486262	2.36283	0.00160772	0.00887008	RTN4/HMGB1/CAV1/FLOT1/PUM1/NR1H3/ANKRD17/HSPA1A/NINJ1/CYBA/IFI35/PJA2/ZDHHC5/LBP/WDFY1/PUM2/ZCCHC3/PELI1/SLC15A3/TLR4/TICAM2/HSPA1B/DDX60/TLR1/DDX3X/DHX58/LTF
SC	GOBP_REGULATION_OF_EXTRINSIC_APOPTOTIC_SIGNALING_PATHWAY_IN_ABSENCE_OF_LIGAND	43	0.49185	2.38998	0.00160772	0.00887008	CTNNA1/PPP2R1B/HTRA2/PRDX2/PPP2R1A/SRPX/PPP1CA/FGFR1/STRADB/MAP2K5/HSPA1A/BCL2L1/ZC3HC1/WWOX/BCL2/AKT1/RIPK1/MCL1/IFI6/SNAI2/FGF10/EYA2/HSPA1B
SC	GOBP_MRNA_SPLICE_SITE_SELECTION	43	0.531164	2.58102	0.00160772	0.00887008	SNRPC/SF1/NOL3/CELF2/LUC7L3/SLU7/PUF60/SRSF9/CELF1/YTHDC1/SF3A1/SRSF10/SF3A3/SRSF1/SRSF6/SETX/SRSF5/LUC7L2/SFSWAP/PSIP1/ISY1/PRPF39
SC	GOBP_VESICLE_MEDIATED_TRANSPORT_BETWEEN_ENDOSOMAL_COMPARTMENTS	43	0.57464	2.79228	0.00160772	0.00887008	CHMP3/RDX/RAB7A/SNX3/RAB5A/RILP/WASH3P/DAB2/SNX12/EEA1/MSN/MTMR2/FLNA/MYO1D/EZR/HOOK2/KIF16B/CORO1A/STX8/SNF8/MAP2K1/PTPN23/MAP2K2/BECN1/PIK3R4/AKTIP/DNAJC13/SNX16/WDR81
SC	GOBP_ER_NUCLEUS_SIGNALING_PATHWAY	43	0.598749	2.90942	0.00160772	0.00887008	TMCO1/WFS1/BOK/HSPA5/ATF4/DDIT3/EIF2S1/NFE2L2/INSIG1/MBTPS1/CCDC47/ATF6/ERLIN1/TMED2/SCAP/FBXW7/SREBF2/QRICH1/NCK1/PTPN1/SREBF1/PPP1R15A/EIF2A/ZBTB7B/ERLIN2/ARHGEF10L/LPCAT3/AMFR/INSIG2
SC	GOBP_NEGATIVE_REGULATION_OF_INTRACELLULAR_PROTEIN_TRANSPORT	43	0.614331	2.98514	0.00160772	0.00887008	ITGB1BP1/CD36/OS9/SUMO1/PARK7/APOD/UBE2J1/TXN/INPP5K/PKIG/ERLEC1/INSIG1/DERL2/MDFIC/LMAN1/ADIPOQ/BAG3/DMTN/CDK5/BAG4/GDI1/ANGPT1/UFM1/CHP1/UBE2G2/UBAC2
SC	GOBP_CELLULAR_RESPONSE_TO_NUTRIENT	42	0.46453	2.23337	0.00161031	0.00887008	SNW1/LPL/CDKN2B/LEP/XBP1/PDK2/FOLR2/POSTN/ATP2B1/SFRP1/GAS6/NCOA1/USF2/FES/COL1A1/RXRA/PIM1/PENK/HMOX1/SNAI2/SRF/MN1/KANK2
SC	GOBP_RESPONSE_TO_COLD	50	0.448191	2.26743	0.00161031	0.00887008	ACADVL/PLIN1/HSP90AA1/HSPD1/LPL/CIRBP/FOXO1/UCP2/ACADM/METRNL/ADM/RNF34/CIDEA/ATP2B1/DNAJC3/ADRB2/MT-CO2/EIF2AK4/NFKBIA/THRA/PRKACA/CXCL10/APPL2
SC	GOBP_POSITIVE_REGULATION_OF_ACTIN_FILAMENT_POLYMERIZATION	50	0.453273	2.29314	0.00161031	0.00887008	RHOA/PFN1/SNX9/BIN1/ARPC2/CDC42EP2/PFN2/CDC42EP4/ARF6/GRB2/CTTN/PYCARD/MLST8/BAG4/LMOD1/CDC42EP1/NCK1/FCHSD2/MTOR/EVL/CDC42EP5/CDC42EP3/CCL21/HCK
SC	GOBP_UNSATURATED_FATTY_ACID_BIOSYNTHETIC_PROCESS	50	0.461582	2.33517	0.00161031	0.00887008	AKR1C3/PTGES3/CBR1/MIF/ANXA1/ELOVL1/ELOVL5/FABP5/CD74/HPGDS/FADS3/SCD/PNPLA8/PTGES2/PTGDS/AVP/ABCD2/ELOVL3/EDN1/SIRT1/DECR2/PIBF1/PTGES/PLA2G4A
SC	GOBP_ESTABLISHMENT_OF_PROTEIN_LOCALIZATION_TO_VACUOLE	50	0.468588	2.37062	0.00161031	0.00887008	HSPA8/RAB7A/CLU/VPS4A/NCOA4/VPS25/M6PR/WASH3P/SORT1/AP3D1/VPS37A/VPS28/LAPTM5/LAMP2/AP3B1/SNF8/SMURF1/STAM/HGS/PTPN23/PIK3R4/VPS13D/VPS37C/AP3M1/VPS41/TNFAIP3/GGA3/SNX16/VPS13A/SCARB2
SC	GOBP_BASE_EXCISION_REPAIR	42	0.499308	2.40058	0.00161031	0.00887008	XPA/APEX1/RPA1/RPA3/NEIL2/PCNA/RPA2/MPG/RPS3/NTHL1/MBD4/USP47/HUWE1/ERCC5/POLG/UNG/XRCC1/FEN1/SMUG1/PARP2/PNKP
SC	GOBP_MITOCHONDRION_LOCALIZATION	50	0.474661	2.40134	0.00161031	0.00887008	UBB/UXT/MAP1B/MFN2/UCHL1/MUL1/ARMCX3/MSTO1/HSBP1/ZBED3/NECTIN2/RHOT2/ARMC1/KAT2A/TRAK2/MARK1/TRAK1/MEF2A/BRAT1/LRPPRC/CLUH/RHOT1/DNM1L/MTM1/ACTR10/WASF1/AGTPBP1/OPA1/MAP1S
SC	GOBP_PYRIMIDINE_NUCLEOTIDE_METABOLIC_PROCESS	50	0.481811	2.43751	0.00161031	0.00887008	NME4/DUT/NME2/DCTD/DCTPP1/NME3/NEIL2/NT5C/NME1/AK3/NTHL1/MBD4/UCK1/CMPK1/UNG/TYMP/UCKL1/SMUG1/PRPS1/TBPL1/DTYMK/NME5/UPP1/SHMT1
SC	GOBP_MEGAKARYOCYTE_DIFFERENTIATION	42	0.530605	2.55104	0.00161031	0.00887008	CIB1/MTURN/EIF6/WASF2/PITHD1/CDKN2B/UBA5/RAB7B/LOX/PTPN11/ABI1/HMGB2/PIP4K2A/SH2B3/MEF2C/PRMT1/PTPN6/GABPA/FLI1/SRF/MEIS1/CNOT4/MED1/PRMT6/TESC
SC	GOBP_POSITIVE_REGULATION_OF_PROTEIN_IMPORT	42	0.534399	2.56928	0.00161031	0.00887008	PDCD5/HSP90AB1/RAN/TOMM70/LEP/TRIM28/SMAD3/HDAC3/BAG3/MAPK14/RBM22/DMAP1/HYAL2/FLNA/TARDBP/TPR/HCLS1/PIK3R1/JUP/IPO5/PRKD1/JAK2/PSEN1/PRKCD/CDK1/GLI3/ZC3H12A
SC	GOBP_POSITIVE_REGULATION_OF_SUBSTRATE_ADHESION_DEPENDENT_CELL_SPREADING	42	0.576653	2.77243	0.00161031	0.00887008	CIB1/RAC1/P4HB/ILK/S100A10/CRK/FERMT2/C1QBP/DAB2/ARPC2/ARHGEF7/MDK/TESK1/DMTN/ABL1/NRP1/MYOC/CALR/LIMS2/FLNA/CRKL/MYADM/CDC42/TRIOBP/DOCK1/NEDD9/LIMS1/PREX1
SC	GOBP_NUCLEAR_MEMBRANE_ORGANIZATION	42	0.58541	2.81454	0.00161031	0.00887008	CHMP3/CHMP2A/NSFL1C/VPS4A/BANF1/TMEM43/NEK6/CHMP2B/DCTN1/CHMP1A/CTDNEP1/CHMP6/NDEL1/GPER1/CHMP5/CHMP4A/UBE2I/REEP3/EMD/CHMP7/TARDBP/PAFAH1B1/CHMP4B/VRK1/REEP4
SC	GOBP_POSITIVE_REGULATION_OF_STRESS_FIBER_ASSEMBLY	50	0.559962	2.83288	0.00161031	0.00887008	LIMCH1/ITGB1BP1/RHOA/RAC1/RHOC/S100A10/FERMT2/PFN2/SMAD3/SFRP1/TESK1/ABL1/NRP1/MYOC/BAG4/SORBS3/LPAR1/PXN/TGFBR1/RGCC/PAK1/ROCK2/RAPGEF3/ARHGEF15/FHOD1/MTOR/EVL/CD47/WNT11/CDC42/SDC4/TPM1/ARHGEF10L
SC	GOBP_RIBONUCLEOSIDE_TRIPHOSPHATE_BIOSYNTHETIC_PROCESS	50	0.565739	2.86211	0.00161031	0.00887008	VCP/DGUOK/NME4/STOML2/PINK1/ENO1/IMPDH2/ALDOA/NME2/NME3/NUDT2/NME1/TMSB4X/PID1/UCK1/PARP1/ATP6V0C/MT-ATP6/H19/IMPDH1/AK4/MT-CO2/UCKL1/DNAJC30/UQCC3/SLC25A13/MT-ATP8/NME5/TREM2/SLC25A12/MYC
SC	GOBP_INTRINSIC_APOPTOTIC_SIGNALING_PATHWAY_IN_RESPONSE_TO_DNA_DAMAGE_BY_P53_CLASS_MEDIATOR	42	0.60449	2.90627	0.00161031	0.00887008	SNW1/TRIAP1/MIF/TMEM109/TAF9/PHLDA3/HNRNPK/NUPR1/SHISA5/CD44/CD74/ING2/BAG6/PYCARD/HIPK2/DDIT4/KDM1A/TOPORS/RPL26/IFI16/TAF9B/BCL2/HIPK1/CDKN1A/SIRT1/BCL3/DYRK2/RPS27L/CDIP1
SC	GOBP_REGULATION_OF_VACUOLE_ORGANIZATION	50	0.60792	3.07551	0.00161031	0.00887008	ANXA2/SH3GLB1/PINK1/RALB/RNF5/RAB5A/NUPR1/FEZ2/TREX1/GRN/MTMR3/PHF23/UBQLN2/PIP4K2B/RAB1B/CHMP4A/CHMP4B/PIP4K2A/ADPRH/MOAP1/WIPI1/SNX4/RAB3GAP1/SNX7/BECN1/SNX18/TMEM39A/MTM1/TBC1D14/C9orf72/WDR45/LAPTM4B/SEC22B/SCARB2/ULK1/RAB3GAP2/PIP4K2C
SC	GOBP_ESTABLISHMENT_OF_PROTEIN_LOCALIZATION_TO_ENDOPLASMIC_RETICULUM	42	0.692113	3.32754	0.00161031	0.00887008	SEC61B/SRP14/SPCS2/RAB10/HSPA5/SRP72/SEC61A1/SEC62/SRP54/SRPRB/ZFAND2B/TRAM1/ZFAND2A/SEC61G/SSR3/HERPUD1/SRP68/UBL4A/BAG6/SRP9/GET4/SEC63/SRPRA/CHMP4A/SPCS3/CHMP4B/SGTA/MAN1A1/SPCS1/RAB3GAP1/TRAM2
SC	GOBP_CELLULAR_RESPONSE_TO_CAMP	53	0.429241	2.2121	0.0016129	0.00887008	APEX1/GPD1/HSPA5/ASS1/INPP5K/AQP1/ADIPOQ/ZFP36L1/DMTN/IGFBP5/INHBB/KDM1A/CRHBP/PDE2A/EZR/PCK1/PKD2/FDX1/RAPGEF1/APP/AKAP9/PENK/RAP1A/RAPGEF3/CYP1B1/ITPR2
SC	GOBP_EMBRYO_IMPLANTATION	53	0.436461	2.24931	0.0016129	0.00887008	SOD1/UBE2Q1/BSG/ARHGDIB/C1QBP/TGFBR2/RPL29/TRIM28/MMP2/TIMP1/CALR/TPPP3/IGFBP7/FBLN1/VMP1/RECK/ACVR1C/FKBP4/SPP1/TRO/GJA1/DDR1/MMP9
SC	GOBP_NEGATIVE_REGULATION_OF_FAT_CELL_DIFFERENTIATION	53	0.453573	2.33749	0.0016129	0.00887008	DDIT3/FOXO1/FERMT2/INSIG1/GPS2/SORT1/SMAD3/CCDC85B/ADIPOQ/GPER1/ZFP36L2/WWTR1/TRIB2/YAP1/ID4/LRP3/TGFB1I1/ANKRD26/SIRT1/ASXL1/RUNX1T1/JAG1
SC	GOBP_PROTEIN_SUMOYLATION	53	0.473681	2.44112	0.0016129	0.00887008	SUMO3/RANBP2/SUMO1/MUL1/PARK7/SAE1/GNL3/UBA2/TRIM28/RWDD3/TOLLIP/PIAS1/SUMO2/ZMIZ1/UBE2I/ZBED1/TOPORS/RELA/HMG20B/HDAC7/KIAA1586/PIAS4/TRIM27/CTNNB1/PIAS3/IFIH1/HMG20A/EGR1
SC	GOBP_NEGATIVE_REGULATION_OF_ENDOTHELIAL_CELL_PROLIFERATION	53	0.487334	2.51148	0.0016129	0.00887008	SPARC/CAV1/STAT1/CAV2/PDCD10/TNMD/MMRN2/AIMP1/PTPRM/PPARG/NR2F2/THBS1/TGFBR1/RGCC/APOE/MEF2C/ACVRL1/ATOH8/SULF1/CCL2/KRIT1/ALOX5
SC	GOBP_ESTABLISHMENT_OF_ENDOTHELIAL_BARRIER	53	0.491035	2.53056	0.0016129	0.00887008	RDX/RAB1A/EDNRB/ADD1/VCL/MSN/PECAM1/CLDN5/FASN/TJP1/RAB1B/ROBO4/CDH5/TNFRSF1A/PPP1R12A/PDE2A/ROCK1/EZR/RAPGEF1/EDNRA/ROCK2/RAP1A/RAPGEF3/SOX18/AFDN/MYD88/MYADM/TJP2/ICAM1
SC	GOBP_MITOTIC_METAPHASE_PLATE_CONGRESSION	53	0.500082	2.57718	0.0016129	0.00887008	CHMP3/CHMP2A/BOD1/DCTN2/VPS4A/NUDC/CHMP2B/RAB11A/KIF22/KPNB1/CHMP1A/CHMP6/EML3/PINX1/CHMP5/CHMP4A/CHMP7/HNRNPU/PDCD6IP/CHMP4B/CDC23/EML4/CCNB1/CUL3/ZW10/BECN1/MAD1L1/RRS1/PIBF1/RMDN1/ANKRD53
SC	GOBP_CORONARY_VASCULATURE_DEVELOPMENT	47	0.461125	2.28372	0.00161551	0.00887008	GPC3/SNX17/MESP1/VEGFB/TGFBR3/PDGFRB/GPER1/NRP1/DYNC2H1/AP2B1/PLXND1/TGFBR1/APLNR/BMP4/SEC24B/CNTRL/NOTCH1/SETD2/SRF/SGCD/FGF2/GATA6/ZBTB14/NDST1/ARID2/SUFU
SC	GOBP_NCRNA_3_END_PROCESSING	47	0.461964	2.28788	0.00161551	0.00887008	LARP7/HSD17B10/EXOSC4/SSB/ERI3/TRMT10C/INTS12/EXOSC5/DKC1/ELAC2/INTS5/USB1/RPS21/TUT1/TOE1/EXOSC7/EXOSC8/FBL/EXOSC9/EXOSC10/INTS1/EXOSC3
SC	GOBP_MEMBRANE_PROTEIN_ECTODOMAIN_PROTEOLYSIS	47	0.47727	2.36368	0.00161551	0.00887008	NRDC/TIMP2/ADRA2A/SNX9/TIMP3/SH3D19/TIMP4/MYH9/NCSTN/PSENEN/TIMP1/PSEN2/ROCK1/FURIN/BACE2/APOE/SNX33/ERAP1/APH1A/RBMX/BACE1/TNFRSF1B/DAG1/PACSIN3/ADAM9/PSEN1/MMP7/SPPL2B
SC	GOBP_POSITIVE_REGULATION_OF_G1_S_TRANSITION_OF_MITOTIC_CELL_CYCLE	47	0.484173	2.39787	0.00161551	0.00887008	APEX1/RDX/UBE2E2/ANXA1/CPSF3/ANKRD17/CCND1/LSM10/KMT2E/AIF1/MEPCE/PLRG1/CCND2/EIF4G1/CCND3/TFDP1/EGFR/CUL4B/RGCC/AKT1/RRM1
SC	GOBP_REGULATION_OF_FATTY_ACID_BIOSYNTHETIC_PROCESS	47	0.492881	2.44099	0.00161551	0.00887008	ACADVL/EIF6/NR1H3/ANXA1/INSIG1/ELOVL5/FABP5/CD74/MLXIPL/NR1H2/ERLIN1/AVP/SCAP/PDK4/APOC1/ABCD2/LPGAT1/RGN/SIRT1/PIBF1/ERLIN2
SC	GOBP_REGULATION_OF_ERYTHROCYTE_DIFFERENTIATION	47	0.499125	2.47192	0.00161551	0.00887008	SMAP1/RBFOX2/STAT1/B2M/MAFB/FAM210B/HSPA1A/ZFP36L1/MAPK14/ISG15/FOXO3/PRKDC/HMGB2/HOXA5/STAT5B/PRMT1/HSPA9/LDB1/STAT3/ACVR2A/KLF13/ZFP36/P4HTM/HSPA1B/CDK6
SC	GOBP_REGULATION_OF_GLUCONEOGENESIS	47	0.511175	2.53159	0.00161551	0.00887008	RANBP2/LEP/DGAT2/FOXO1/PDK2/ACADM/ARPP19/SDHAF3/FAM3C/NNMT/ADIPOQ/PGP/USP7/WDR5/OGT/PPP4R3B/CLK2/KAT2A/SESN2/FBP1/GPT/SIRT1/CRY1
SC	GOBP_RESPONSE_TO_AMINO_ACID_STARVATION	47	0.564284	2.79462	0.00161551	0.00887008	RRAGA/SH3GLB1/DAP/ATF4/EIF2S1/UCP2/RRAGD/SESN1/MAP1LC3A/LARP1/GCN1/EIF2AK4/SESN2/RRAGB/SLC38A2/KPTN/NPRL2/SESN3/NPRL3/IMPACT/RRAGC/MIOS/MTOR/BECN1/CDKN1A/ATF2/ITFG2/EIF2A/MAP3K5/BMT2/PRKD1/WDR24/ATF3
SC	GOBP_MATURATION_OF_SSU_RRNA	47	0.567251	2.80931	0.00161551	0.00887008	SNU13/RIOK1/RPS19/NGDN/WDR46/RPS8/NOB1/TSR3/ABT1/RPS16/LSM6/MRPS11/RPS28/RPS14/GTF2H5/RPP40/RRP36/TSR2/NOL10/RPS21/UTP3/BYSL/TBL3/NOL11/RIOK3/RRS1/UTP4
SC	GOBP_POSITIVE_REGULATION_OF_FIBROBLAST_PROLIFERATION	47	0.571227	2.829	0.00161551	0.00887008	MIF/DDR2/CDK4/S100A6/NDUFS4/IGF1/CD74/GAS6/AQP1/PDGFRB/ABL1/EGFR/ZMIZ1/DHX9/PDGFD/FN1/BMI1/CCNB1/WAPL/PDGFC/FOSL2/CDKN1A/JUN/AGT/MYC/PDGFRA/SIRT6/PDGFB/FGF10/CDK6
SC	GOBP_NEGATIVE_REGULATION_OF_MITOCHONDRION_ORGANIZATION	47	0.594423	2.94388	0.00161551	0.00887008	PARL/GPX1/GHITM/PINK1/BOK/ACAA2/SLC25A5/CLU/TRIAP1/MUL1/TMEM14A/NOL3/TSPO/VAT1/PRELID1/PSMD10/LMNA/PPIF/IGF1/HSPA1A/HUWE1/BNIP3/PPARG/BCL2L1/AVP/AKT1/USP30
SC	GOBP_NEGATIVE_REGULATION_OF_UBIQUITIN_DEPENDENT_PROTEIN_CATABOLIC_PROCESS	47	0.60605	3.00146	0.00161551	0.00887008	HSP90AB1/UBXN1/EIF3H/DDRGK1/PARK7/CAMLG/TAF9/RPS7/RPL11/UCHL5/WAC/SDCBP/BAG6/RPL5/PDCL3/HIPK2/USP7/GIPC1/OGT/BAG5/SMARCC1/SGTA/N4BP1/MAP1A/TRIM39/USP14/RPL23/RYBP/TTC36/CSNK2A2/MTM1/CCAR2/PSEN1
SC	GOBP_PROTEIN_EXIT_FROM_ENDOPLASMIC_RETICULUM	47	0.646647	3.20252	0.00161551	0.00887008	VCP/SURF4/HSP90B1/SEC61B/BCAP31/CD81/OS9/PREB/RANGRF/SEC13/AUP1/UBE2J1/SAR1A/DERL1/ERLEC1/INSIG1/DERL2/HERPUD1/SYVN1/LMAN1/EDEM2/TM9SF4/TMEM30A/FAF2/TMEM129/SEC16A/SEL1L/UBE2G2/RHBDD1/UBAC2/TMED9
SC	GOBP_PROTEIN_DESTABILIZATION	45	0.491933	2.40467	0.00162866	0.00887008	SERF2/MUL1/VPS35/GSN/RNF5/DERL1/MYLIP/RNF139/CTSH/PRKDC/FBXW7/CUL3/SOX17/RAD23A/PRNP/FBXW11/TRIM21/HTT/BMP2/FBXL3/NR1D1/SIRT1/BTRC/ISOC2/SNCA/SIRT6/GGA3/CAPN3/PEX2
SC	GOBP_EXTRACELLULAR_MATRIX_ASSEMBLY	45	0.502432	2.45599	0.00162866	0.00887008	LAMB2/PXDN/FBLN5/COL3A1/EFEMP2/COL1A2/LAMB3/MFAP4/RAMP2/SMAD3/GAS6/LAMB1/LOX/TNXB/RGCC/PHLDB1/GPM6B/ANTXR1/QSOX1/EMILIN1/NOTCH1/DAG1/LTBP3/PHLDB2/AGT
SC	GOBP_ENDODERMAL_CELL_DIFFERENTIATION	45	0.516626	2.52537	0.00162866	0.00887008	ITGB5/MESP1/PAF1/COL5A2/COL4A2/COL6A1/ITGA7/LAMB3/COL12A1/RTF1/MMP2/HSBP1/CTR9/LAMB1/COL5A1/ITGAV/FN1/ITGA5/SOX17/ITGB2/CTNNB1/SETD2/MMP15/MMP9/GATA6/MMP14/COL8A1
SC	GOBP_ANTIGEN_PROCESSING_AND_PRESENTATION_OF_EXOGENOUS_ANTIGEN	45	0.559236	2.73366	0.00162866	0.00887008	PSME1/CTSF/HLA-DRA/HLA-DRB1/HLA-E/HLA-DMA/B2M/HLA-DPA1/HLA-A/HLA-DPB1/CD74/AP3D1/HLA-DQB1/CTSD/HLA-DMB/CTSL/HLA-F/AP3B1/HLA-DRB5/FCER1G/LNPEP/IFI30/HLA-DQA1/CLEC4A/MFSD6/CD1C/HLA-DQA2/FCGR2B/LGMN/CTSS/PIKFYVE/TAP1
SC	GOBP_FIBROBLAST_MIGRATION	45	0.570538	2.7889	0.00162866	0.00887008	ITGB1BP1/ITGB1/CORO1C/LAMTOR2/RAC1/ILK/PDLIM1/DDR2/GNA12/AKAP12/ARHGEF7/ARID5B/IQGAP1/DMTN/BAG4/HYAL2/THBS1/CYGB/AKT1/ZFAND5/PLEC/ARHGAP4/ACTA2/APPL2/SDC4/APPL1/FGF2
SC	GOBP_HEART_VALVE_MORPHOGENESIS	54	0.427007	2.20199	0.00164474	0.00887008	TGFBR2/SLIT3/TWIST1/SOX4/EFNA1/ROCK1/BMP4/OLFM1/MEF2C/ROCK2/EMILIN1/HEY1/NOTCH1/RB1/MTOR/BMP2/GJA5/NFATC1/SLIT2/FGFRL1/SNAI2/ACVR1/NOTCH2/HEYL/BMPR2/JAG1/ELN
SC	GOBP_POSITIVE_REGULATION_OF_CELL_MATRIX_ADHESION	54	0.431824	2.22684	0.00164474	0.00887008	CIB1/ITGB1BP1/CD36/POLDIP2/RAC1/EFEMP2/S100A10/FERMT2/SMAD3/MAP4K4/SFRP1/RRAS/THY1/ABL1/NRP1/MYOC/UTRN/ROCK1/JUP/CSF1/RIN2/TEK/KDR/DAG1/SDC4/COL16A1/CDK6/CCL21/LIMS1
SC	GOBP_RESPONSE_TO_DSRNA	54	0.4469	2.30458	0.00164474	0.00887008	DDX1/RFTN1/CAV1/FLOT1/PQBP1/MUL1/KCNJ8/RALB/NPM1/NFKB1/SLC3A2/DHX9/NFKBIA/IFIT1/ZCCHC3/DDX21/RIPK2/PELI1/TICAM1/IRF3/IFIH1/RIOK3
SC	GOBP_NEGATIVE_REGULATION_OF_PEPTIDYL_TYROSINE_PHOSPHORYLATION	54	0.448622	2.31346	0.00164474	0.00887008	CAV1/GGNBP2/SNX6/PPP2R1A/VPS25/RACK1/TSG101/PPP2CA/CHMP6/SH3BP5/SFRP1/THY1/DMTN/HYAL2/ZGPAT/SFRP2/SH2B3/DUSP22/PTPN6/ERRFI1/CBLB/PTPRC/PIBF1/SOCS1/SOCS3/PSEN1/LILRB4/CD300A/PRKCD/MVP
SC	GOBP_NUCLEOSOME_ASSEMBLY	54	0.451531	2.32846	0.00164474	0.00887008	ANP32B/NAP1L4/ATRX/DAXX/NPM1/CENPW/POLE3/MIS18A/DNAJC9/SART3/BAZ1A/ASF1A/RSF1/NAP1L1/HMGB2/SMYD3/TSPYL1/BRD2/SET/ITGB3BP/TSPYL4/NAP1L5/TSPYL2
SC	GOBP_HYDROGEN_PEROXIDE_METABOLIC_PROCESS	54	0.462967	2.38743	0.00164474	0.00887008	SOD1/GPX1/PXDN/PINK1/PRDX1/MAOB/RAC1/PRDX4/PRDX5/FYN/PRDX2/PARK7/CAT/PRDX3/GPX3/CYBA/MT-CO2/CTNS/RAC2/CYBB/ACOX1/HBB/HBA2/SNCA/HBA1/HBM/NOXA1/ZNF205/HBG2/HBQ1/HBD
SC	GOBP_ENDODERM_FORMATION	54	0.463546	2.39042	0.00164474	0.00887008	ITGB5/MESP1/PAF1/COL5A2/COL4A2/COL6A1/ITGA7/LAMB3/COL12A1/RTF1/MMP2/HSBP1/CTR9/LAMB1/COL5A1/ITGAV/FN1/ITGA5/DUSP1/SOX17/ITGB2/DUSP4/CTNNB1/SETD2/MMP15/MMP9/GATA6/MMP14/DUSP2/COL8A1/DKK1/DUSP5
SC	GOBP_PLATELET_DERIVED_GROWTH_FACTOR_RECEPTOR_SIGNALING_PATHWAY	54	0.476567	2.45757	0.00164474	0.00887008	APOD/ARID5B/TXNIP/IQGAP1/SLC9A3R1/PDGFRL/ADIPOQ/PDGFRB/ABL1/LOX/LRP1/NRP1/PTPN11/PDGFD/CSPG4/ZFAND5/PDGFC/HGS/PTPN1/CBLB/TIPARP/CSRNP1/SNCA/PDGFRA/BCAR1/PDGFB/JAK2
SC	GOBP_POSITIVE_REGULATION_OF_DNA_BINDING	54	0.491891	2.53659	0.00164474	0.00887008	CEBPG/EDF1/HMGB1/CALM1/DDRGK1/PARK7/CALM2/NME1/TXN/LAMTOR5/IGF1/TRIM28/CALM3/PARP1/TWIST1/PINX1/PPARG/HIPK2/GTF2B/HMGB2/ACD/HES1/RB1/CTNNB1/KLF4/SKI/MYC/MMP9/PLAUR/JAK2
SC	GOBP_REGULATION_OF_LIPID_STORAGE	54	0.518712	2.6749	0.00164474	0.00887008	CD36/LPL/NR1H3/MEST/CES1/ALKBH7/LEP/PNPLA2/NFKB1/PLIN2/C3/CIDEA/HILPDA/OSBPL8/EHD1/PLIN3/PPARG/ITGAV/NR1H2/NFKBIA/ABHD5/FBXW7/SREBF2/OSBPL11/SCARB1/TREM2/ABCA1/SREBF1/SIRT1/ACACB
SC	GOBP_REGULATION_OF_MICROTUBULE_POLYMERIZATION	54	0.529888	2.73253	0.00164474	0.00887008	MAP1B/RAC1/RANGRF/DRG1/MAPRE1/RPS3/DCTN1/ARL3/ARHGEF7/ARL2/HSPA1A/CKAP5/SLAIN2/ABL1/CDH5/FES/PAK1/FKBP4/CDK5RAP2/AKAP9/CLIP3/PRUNE1/CDKN1B/NUMA1/CAMSAP2/GIT1/GBA2/TBCD/SNCA/ANKRD53/NIN/HSPA1B/MAPRE3/STMN2/STMN1
SC	GOBP_RELEASE_OF_CYTOCHROME_C_FROM_MITOCHONDRIA	54	0.600234	3.09529	0.00164474	0.00887008	PARL/GPX1/GHITM/PDCD5/MFF/PINK1/BOK/FIS1/CLU/TRIAP1/NOL3/PRELID1/GGCT/BAD/FAM162A/PSMD10/LMNA/PPIF/IGF1/PYCARD/BNIP3/GPER1/CIDEB/BCL2L1/TNFSF10/BCL2/AVP/MOAP1/AKT1/IFI6/DNM1L/BID/MMP9/BCL2L2/PLAUR
SC	GOBP_NADH_DEHYDROGENASE_COMPLEX_ASSEMBLY	54	0.756988	3.90364	0.00164474	0.00887008	NDUFAB1/NDUFAF3/NDUFA2/NDUFB8/NDUFB7/NDUFS5/NDUFA13/NDUFA11/NDUFA8/NDUFAF2/TMEM126A/NDUFB9/NDUFB4/NDUFA6/NDUFB6/NDUFB11/NDUFA10/NDUFC1/TMEM126B/NDUFA12/NDUFB10/NDUFS2/NDUFA1/NDUFAF4/NDUFS4/NDUFC2/NDUFS8/ACAD9/BCS1L/NDUFB2/NDUFS3/MT-ND1/NDUFA3/MT-ND4/NDUFS7/NDUFB1/OXA1L/NDUFAF1/MT-ND2/NDUFB3/NDUFA5/MT-ND5
SC	GOBP_ICOSANOID_BIOSYNTHETIC_PROCESS	55	0.409992	2.12889	0.00166389	0.00887008	AKR1C3/PTGES3/MGST2/CBR1/MIF/MGST3/ANXA1/FABP5/CD74/ALOX5AP/LTA4H/LTC4S/HPGDS/PNPLA8/PTGES2/PTGDS/AVP/EDN1/SIRT1/PIBF1/SYK/PTGES/PLA2G4A/ALOX5/GGT7
SC	GOBP_NEGATIVE_REGULATION_OF_SMALL_GTPASE_MEDIATED_SIGNAL_TRANSDUCTION	55	0.420966	2.18587	0.00166389	0.00887008	ITGB1/RABGEF1/MFN2/RASA3/KCTD10/BCL6/ARHGAP24/DLC1/RASA1/MYOC/STAMBP/KANK1/MAPKAP1/SPRY1/TNFAIP1/ARHGAP35/PPP2CB/RASIP1/HEG1/RASA2/FBP1/SPRY2/CUL3/ARHGAP12/LZTR1/SPRY4/SLIT2
SC	GOBP_VASCULAR_ENDOTHELIAL_GROWTH_FACTOR_RECEPTOR_SIGNALING_PATHWAY	55	0.435641	2.26208	0.00166389	0.00887008	FZD4/FYN/VEGFB/HSPB1/MMRN2/TMEM204/CLEC14A/MAPK14/PDCD6/MAPKAPK3/NRP1/AXL/VEGFD/ITGA5/MAPKAPK2/EMILIN1/HGS/KDR/PTPN1/VEGFC/SULF1/PRKD1/BCAR1/FGF10/DAB2IP/PRKD2/FOXC1/HHEX/GRB10/PTK2B
SC	GOBP_REGULATION_OF_CELL_MIGRATION_INVOLVED_IN_SPROUTING_ANGIOGENESIS	55	0.573447	2.97764	0.00166389	0.00887008	CIB1/ITGB1BP1/RHOA/ANXA1/PDCD10/SRPX2/MMRN2/MAP2K5/ABL1/NRP1/THBS1/HDAC7/MAP3K3/PLK2/FBXW7/MEOX2/STARD13/NOTCH1/HDAC5/KDR/KLF4/HMOX1/FGF2/RHOJ
SC	GOBP_POSITIVE_REGULATION_OF_INTRINSIC_APOPTOTIC_SIGNALING_PATHWAY	55	0.57649	2.99344	0.00166389	0.00887008	SOD1/BCAP31/CAV1/UBB/BOK/FIS1/DDIT3/PARK7/BAD/RACK1/RPS3/PRKRA/NUPR1/RPS7/SERINC3/SLC9A3R1/PLEKHF1/STYXL1/SFPQ/RPL26/EIF5A/PIAS4/BCLAF1/FBXW7/NCK1/MCL1/SIAH1/NACC2/DNM1L/S100A9/BECN1/MSX1/SIRT1/BID/MYC/S100A8/RIPK3
SC	GOBP_ACTIN_FILAMENT_DEPOLYMERIZATION	56	0.409081	2.12895	0.00167224	0.00887008	RDX/MTPN/FLII/CAPZB/DSTN/SPTBN1/GSN/CFL2/LIMA1/WDR1/CFL1/ADD1/TWF2/EPS8/CAPZA1/SPTAN1/DMTN/CAPG/LMOD1/TMOD1/SWAP70/TWF1/PLEK/SVIL
SC	GOBP_INSULIN_SECRETION_INVOLVED_IN_CELLULAR_RESPONSE_TO_GLUCOSE_STIMULUS	56	0.410267	2.13512	0.00167224	0.00887008	JAGN1/NDUFAF2/PPP3CB/ADRA2A/SRI/MPC2/HMGN3/BAD/HLA-DRB1/CDK16/UCP2/PIM3/RAB11FIP2/OXCT1/RAB11B/LRP5/OSBP/KLF7/FKBP1B/EFNA5/STX4/NR1D1/RAB11FIP5/ADCY5/PTPRN2/SLC9B2/SIDT2
SC	GOBP_INTERFERON_BETA_PRODUCTION	56	0.417082	2.17059	0.00167224	0.00887008	HSP90AA1/YY1/FLOT1/TOMM70/RNF135/ZBTB20/PYCARD/NMI/SIRPA/PTPN11/ISG15/DHX9/HMGB2/RNF216/IRF7/POLR3F/RIPK2/TICAM1/IRF3/IFIH1/TLR4/POLR3C/RIOK3/PPM1B/NLRX1/PTPRS/DDX58/DDX3X/DHX58/POLR3B
SC	GOBP_REGULATION_OF_DNA_TEMPLATED_TRANSCRIPTION_INITIATION	56	0.4452	2.31692	0.00167224	0.00887008	HMGB1/SUB1/CDK4/MED4/TAF9/TAF7/CTNNBIP1/TAF12/RRN3/GTF2A2/MITF/TAF11/TWIST1/TAF3/SETX/TAF10/THRA/BCLAF1/ERCC1/MED12/MED30/TAF13/TBP/JUN/MED14/SRF/MED16/GTF2A1/ATF7IP/MED24/PSMC6
SC	GOBP_P38MAPK_CASCADE	56	0.450124	2.34255	0.00167224	0.00887008	LEP/SASH1/ZFP36L1/MAPK14/MAP3K7/GADD45A/MAP3K3/PJA2/EZR/STK39/BMP4/MAPKAPK2/DUSP1/PER1/PRMT1/GADD45G/RELL1/MAP2K3/TREM2/BMP2/ATF2/MAP3K5/GADD45B/LGALS9/ZFP36/MAP3K4/ULK4/DAB2IP/AGER/DUSP10/ZC3H12A/SPHK1/MAPK11/SPI1/MFHAS1
SC	GOBP_REGULATION_OF_MITOCHONDRIAL_MEMBRANE_PERMEABILITY	56	0.471022	2.4513	0.00167224	0.00887008	VDAC2/BOK/BNIP3L/ACAA2/SLC25A5/MUL1/TMEM14A/NOL3/ALKBH7/BAD/PPIF/SLC25A4/HEBP2/HSPA1A/BNIP3/RHOT2/BCL2L1/CHCHD10/NMT1/BCL2/MOAP1/RHOT1/CNP/ATF2/BLOC1S2/BID/GZMB/BCL2L2/EYA2/ZNF205/HK2/SLC35F6
SC	GOBP_POSITIVE_REGULATION_OF_TYPE_I_INTERFERON_PRODUCTION	56	0.506524	2.63607	0.00167224	0.00887008	HSP90AA1/FLOT1/HSPD1/PQBP1/STAT1/TOMM70/CD14/GAPDH/RNF135/ZBTB20/PTPN11/ISG15/DHX9/HMGB2/G3BP1/IRAK1/IRF7/ZCCHC3/POLR3F/RIPK2/MYD88/TICAM1/IRF3/IFIH1/TLR4/SETD2/POLR3C/RIOK3/SYK/DDX58/CHUK/DDX3X/DHX58/POLR3B
SC	GOBP_REGULATION_OF_UBIQUITIN_PROTEIN_TRANSFERASE_ACTIVITY	56	0.510416	2.65632	0.00167224	0.00887008	UBE2L3/PINK1/SKP1/PARK7/STUB1/RPS7/RPS15/RPS2/RPL11/UBE2N/RPL5/PTEN/ABL1/TOPORS/RPS20/BAG5/DCUN1D4/BMI1/BUB3/MAD2L2/FBXW7/PIN1/DCUN1D5/DCUN1D1/FEM1B/RPL23/DNM1L/RPL37/ARRDC4/ARRDC3/BTRC/PSEN1/DCUN1D3/CDC14B/AXIN1/MASTL
SC	GOBP_REGULATION_OF_DNA_TEMPLATED_TRANSCRIPTION_ELONGATION	56	0.540925	2.8151	0.00167224	0.00887008	NELFE/LARP7/EAPP/HTATSF1/HMGN1/DDX39B/ZMYND11/SUPT4H1/CDK9/TCEA2/HEXIM1/SETD5/SUPT5H/CCNK/HNRNPU/GTF2F1/TCERG1/NELFB/TSFM/ELL2/THOC1/EAF2/BRD4/WDR43/LDB1/CTNNB1/SCAF8/EAF1/ALYREF/CCNT1/CCNT2/CCAR2/CBX7/RNF168/NELFCD/AXIN1/SUPT16H
SC	GOBP_NEGATIVE_REGULATION_OF_BLOOD_VESSEL_ENDOTHELIAL_CELL_MIGRATION	56	0.555569	2.89131	0.00167224	0.00887008	ITGB1BP1/HMGB1/ATP2B4/CSNK2B/RHOA/PDCD10/MMRN2/MAP2K5/PPARG/THBS1/GADD45A/RGCC/APOE/JUP/MEF2C/MEOX2/STARD13/ACVRL1/NOTCH1/HDAC5/KLF4
SC	GOBP_RUFFLE_ORGANIZATION	56	0.603693	3.14176	0.00167224	0.00887008	CAV1/RDX/FAM98A/CORO1C/RAC1/PFN1/INPP5K/LIMA1/CYFIP1/AIF1/HRAS/CORO1B/RHOG/PFN2/EPS8/ARF6/ARHGAP24/NDEL1/CSF1R/BAG4/KANK1/SNX10/AIF1L/DEF8/DBNL/ARFIP2/PLEK/CSPG4/TCIRG1/ABI3/INPPL1/MTOR/EVL/P2RY12/TPM1/ICAM1/CCL21
SC	GOBP_PROTEIN_INSERTION_INTO_MEMBRANE	56	0.620037	3.22681	0.00167224	0.00887008	PDCD5/EMC6/NDUFA13/TIMM13/HSP90AA1/WDR83OS/TOMM22/TIMM9/SEC61A1/TOMM70/CAMLG/MMGT1/TRAM1/TIMM22/ROMO1/TIMM8B/EMC9/EMC7/BCS1L/TIMM10/UBL4A/BAG6/TIMM10B/GET4/EMC8/EMC3/SAMM50/HSPA4/EGFR/CCDC47/EMC4/NMT1/MOAP1/SGTA/RTP4/OXA1L/TRAM2/EMC2
SC	GOBP_RESPONSE_TO_CADMIUM_ION	59	0.444137	2.33917	0.00168919	0.00887008	SOD1/AKR1C3/SUMO1/PCNA/DAXX/CAT/EGFR/ALAD/NUDT1/HSF1/MT1X/ERCC1/AKT1/MT1F/PRNP/ABCB6/GPI/SLC30A1/CDKN1B/CYBB/MT1M/HAAO/JUN/HMOX1/MT2A/MT1E/MMP9/FOS/MT1DP/MT1A/CHUK/MT1G/MAPK3/CDK1
SC	GOBP_NUCLEAR_TRANSCRIBED_MRNA_CATABOLIC_PROCESS_DEADENYLATION_DEPENDENT_DECAY	59	0.477983	2.51743	0.00168919	0.00887008	POLR2G/YBX1/CSDE1/LSM1/DCP1A/HNRNPD/PABPC1/SYNCRIP/CNOT8/EXOSC5/PAIP1/ZFP36L1/CNOT7/ZFP36L2/DHX9/HNRNPU/MLH1/NT5C3B/EXOSC7/EXOSC8/TOB1/BTG2/CNOT2/PAN3/EXOSC9/DCP1B/CNOT1/RC3H1/EXOSC3/TNRC6A/ZFP36
SC	GOBP_AORTA_DEVELOPMENT	59	0.484634	2.55246	0.00168919	0.00887008	RBPJ/SNX17/COL3A1/EFEMP2/LEP/HECTD1/ENG/PDGFRB/SOX4/LOX/LRP1/PDE2A/SIX1/AP2B1/PLXND1/APLNR/PKD2/EDNRA/LOXL1/SEC24B/NPRL3/ACVRL1/CNTRL/HEY1/HES1/NOTCH1/EFNB2/SRF/JAG1
SC	GOBP_POSITIVE_REGULATION_OF_DOUBLE_STRAND_BREAK_REPAIR	59	0.485298	2.55596	0.00168919	0.00887008	MORF4L1/MORF4L2/MGMT/ACTB/MEAF6/PARP3/UBE2N/KAT5/VPS72/PARP1/WDR48/DMAP1/KMT5B/SPIDR/PRKDC/UBE2V2/MRGBP/ACTR2/ZCWPW1/MAD2L2/PNKP/RBBP8/MMS19/YEATS4/SETMAR/ACTL6A/ING3/SLF1/RUVBL2/EPC2/SPIRE1/WRAP53/SMCHD1
SC	GOBP_NUCLEOSIDE_BISPHOSPHATE_BIOSYNTHETIC_PROCESS	59	0.485578	2.55743	0.00168919	0.00887008	ACSS2/PDHA1/ACSL1/PPT1/PPCS/SLC25A1/MPC2/ELOVL1/PDK2/ELOVL5/DLD/COASY/ACLY/TECR/ACSL3/ACAT1/PAPSS2/SLC35B3/PAPSS1/GCDH/PDK4/PPCDC/ACSL5/PPT2/SLC35B2/ELOVL3/ACSL4/ACOT7/DCAKD/PDHB/DLAT/ACACB
SC	GOBP_NEGATIVE_REGULATION_OF_MAP_KINASE_ACTIVITY	59	0.491429	2.58825	0.00168919	0.00887008	CAV1/GSTP1/UCHL1/STK38/SMPD1/AIDA/INPP5K/DNAJA1/SFRP1/ADIPOQ/PPARG/GBA/CDK5RAP3/HYAL2/SPRY1/SFRP2/APOE/SH2B3/BMP4/PDCD4/SPRY2/DUSP1/PTPN6/RGS2/HIPK3/PTPN1/BMP2/SPRY4/AGT/DUSP16/CD300A/DAB2IP
SC	GOBP_REGULATION_OF_MUSCLE_HYPERTROPHY	59	0.512183	2.69755	0.00168919	0.00887008	ATP2B4/MTPN/YY1/TOMM70/FOXO1/LMNA/IGF1/SMAD3/PARP1/IGFBP5/PPARG/CDK9/TNFRSF1A/LMCD1/ROCK1/TWF1/IL6ST/PPP3CA/PARP2/MEF2A/GLRX3/ROCK2/PI16/CAMK2D/RGS2/NOTCH1/ERRFI1/TNFRSF1B/BECN1/EDN1/AGT/G6PD
SC	GOBP_GOLGI_TO_PLASMA_MEMBRANE_TRANSPORT	59	0.584129	3.07648	0.00168919	0.00887008	VAMP3/RAB10/OPTN/GOLGA4/GOPC/SPTBN1/RABEP1/VAMP5/RACK1/RAB34/GOLGA7/RAB31/ARL3/COMMD1/GOLPH3/ACSL3/VAMP4/CCDC22/EXOC1/SEC16A/ARFRP1/PKDCC/SYS1/EXOC2/CNST/ATP2C1/EXOC6B/MACF1/EXOC4/VAMP2/CSK/GOLPH3L/CCDC93/NSF/ARFGEF2/GGA3/KIF13A
SC	GOBP_NEGATIVE_REGULATION_OF_INTRACELLULAR_TRANSPORT	59	0.604456	3.18354	0.00168919	0.00887008	ITGB1BP1/CD36/OS9/MAP1B/CRYAB/SUMO1/VPS35/PARK7/APOD/UBE2J1/TXN/INPP5K/SNX3/PKIG/ERLEC1/INSIG1/DERL2/SNX12/MDFIC/LMAN1/ADIPOQ/ARFIP1/BAG3/DMTN/CDK5/BAG4/TPR/GDI1/ARHGAP1/ANGPT1/NUP153/UFM1/CHP1/UBE2G2/UBAC2
SC	GOBP_RIBOSOME_ASSEMBLY	59	0.720237	3.79333	0.00168919	0.00887008	XRCC5/MRPL22/EIF6/RPL3/MRPL20/RPLP0/RPL6/MRPS2/RPS19/RPS5/NPM1/DHX29/RPSA/C1QBP/ERAL1/RPS15/RPL10/RPL11/DDX28/RPL5/ABT1/MTERF4/SBDS/MRPS11/RPS28/RPL24/RPS14/MRPS7/MPV17L2/PRKDC/RPS27/RPF2/BOP1/TRAF7/NGRN/DHX30/PPAN/MTERF3/EIF2A/RPL38/EFL1/RPL23A/RRS1/RPS27L/MRTO4/NLE1/RRP7A
SC	GOBP_RIBONUCLEOSIDE_MONOPHOSPHATE_METABOLIC_PROCESS	58	0.391338	2.04548	0.00169205	0.00887008	ATIC/GMPR2/IMPDH2/AK2/NUDT2/GUK1/NT5C/APRT/AK3/HPRT1/MPP1/UCK1/CMPK1/ADK/AK1/IMPDH1/AK4/ADA/UCKL1/PRTFDC1/PRPS1/PRPS2/NT5E
SC	GOBP_NEGATIVE_REGULATION_OF_HORMONE_SECRETION	58	0.392045	2.04918	0.00169205	0.00887008	JAGN1/NDUFAF2/ADRA2A/LEP/CRY2/NMB/UCP2/SFRP1/PIM3/ADIPOQ/REST/HADH/INHBB/PTPN11/CRHBP/PPP3CA/PFKL/ACVR1C/KLF7/FKBP1B/SREBF1/EDN1/CRY1/GJA1/RAB11FIP5
SC	GOBP_CYTOPLASMIC_PATTERN_RECOGNITION_RECEPTOR_SIGNALING_PATHWAY	58	0.394236	2.06063	0.00169205	0.00887008	PHB2/PHB/PUM1/ANKRD17/C1QBP/RNF135/BIRC2/HSPA1A/LSM14A/MAP3K7/RELA/NFKBIA/GPATCH3/IRF7/PUM2/ZCCHC3/RIPK2/TSPAN6/SLC15A3/IRF3/IFIH1/BIRC3/TLR4/RIOK3/ERBIN/NLRX1/TNFAIP3/HSPA1B/LACC1/DDX58/DDX60
SC	GOBP_NEURON_PROJECTION_REGENERATION	57	0.40165	2.08689	0.00169205	0.00887008	CTNNA1/LAMB2/MAP1B/TSPO/PTPRF/APOD/GRN/MMP2/ADM/PTEN/THY1/STK24/NDEL1/FLNA/PRRX1/CERS2/BCL2/MAP2K1/FKBP1B/SPP1/DAG1/KLF4/JUN/PTPRS/JAK2/DHFR/ULK1/PTN
SC	GOBP_CELLULAR_RESPONSE_TO_CORTICOSTEROID_STIMULUS	58	0.405059	2.1172	0.00169205	0.00887008	UBE2L3/AKR1C3/NR3C1/SERPINF1/RAN/ASS1/ANXA1/ATP2B1/AQP1/ZFP36L1/REST/GPER1/ZFP36L2/DDIT4/FOXO3/HNRNPU/SMYD3/PCK1/PCK2/KLF9/CYP1B1/FAM107A/ERRFI1/MT-ND3/EDN1/CBX3/ACVR1/SGK1/ZFP36/AIFM1/JAK2/FBXO32
SC	GOBP_REGULATION_OF_MIRNA_TRANSCRIPTION	58	0.445075	2.32636	0.00169205	0.00887008	NR3C1/YY1/NFIB/DDX5/GNL3/SMAD3/REST/TEAD1/PPARG/FOXO3/RELA/NR1H2/SREBF2/BMP4/NFATC3/ATOH8/BMP2/SREBF1/STAT3/KLF4/JUN/SRF/SMAD1/MYC/FOS/RARA/EGR1/PDGFB/FGF2/LILRB4/GATA6
SC	GOBP_PROTEIN_K63_LINKED_UBIQUITINATION	57	0.44871	2.33141	0.00169205	0.00887008	UBE2E3/UBE2V1/UBE2E2/TRIP12/RNF5/STUB1/GPS2/HECTD1/SASH1/PLAA/RNF135/UBE2N/UBE2G1/BIRC2/UBE2D4/BFAR/RNF126/ZFP91/UBE2V2/UBE2B/WWP2/TRIM21/TRIM27/PELI1/RNF213/PARP10/TRAF2/UBE2T/RNF168/PELI3
SC	GOBP_NUCLEAR_ENVELOPE_ORGANIZATION	57	0.476973	2.47826	0.00169205	0.00887008	CHMP3/CHMP2A/NSFL1C/VPS4A/BANF1/TMEM43/NEK6/CHMP2B/LMNA/DCTN1/CHMP1A/CTDNEP1/CHMP6/NDEL1/GPER1/CHMP5/CHMP4A/UBE2I/REEP3/EMD/CHMP7/TARDBP/SUN2/PAFAH1B1/CHMP4B/VRK1/SUN1/REEP4/LEMD2/AKAP8L/TOR1B/DMPK/UBXN2B/TOR1A
SC	GOBP_MEMBRANE_PROTEIN_PROTEOLYSIS	58	0.475377	2.48474	0.00169205	0.00887008	PARL/NRDC/TIMP2/ADRA2A/SNX9/TIMP3/SH3D19/TIMP4/MYH9/MBTPS1/NCSTN/PSENEN/TIMP1/PSEN2/CTSH/ROCK1/FURIN/BACE2/APOE/SNX33/ERAP1/APH1A/RBMX/RHBDD1/BACE1/TNFRSF1B/DAG1/AFG3L2/PACSIN3/CLPP/ADAM9/PSEN1/MMP7/SPPL2B
SC	GOBP_NECROTIC_CELL_DEATH	58	0.486473	2.54274	0.00169205	0.00887008	CAV1/BOK/PYGL/NOL3/ALKBH7/TSPO/ASAH1/RBCK1/ITPK1/NUPR1/PPIF/SLC25A4/HEBP2/BIRC2/NINJ1/BNIP3/FADD/ATG9A/YBX3/TMEM123/MT-CO2/OGT/RIPK1/PELI1/DNM1L/IRF3/BIRC3/MAP3K5/ARHGEF2/MIR223/RIPK3/TRAF2
SC	GOBP_ANTIGEN_PROCESSING_AND_PRESENTATION_OF_PEPTIDE_ANTIGEN	58	0.516648	2.70046	0.00169205	0.00887008	CTSF/PDIA3/HLA-DRA/HLA-DRB1/HLA-E/HLA-DMA/B2M/HLA-DPA1/HLA-A/HLA-DPB1/HLA-B/CD74/TAPBPL/HLA-C/PYCARD/HLA-DQB1/CTSD/HLA-DMB/CTSL/CALR/HLA-F/HLA-DRB5/AZGP1/FCER1G/LNPEP/ERAP1/IFI30/HLA-DQA1/CLEC4A
SC	GOBP_REGULATION_OF_PHOSPHOPROTEIN_PHOSPHATASE_ACTIVITY	57	0.55073	2.86149	0.00169205	0.00887008	HSP90B1/HSP90AB1/CSNK2B/CALM1/BOD1/PPP1R11/GNA12/CRY2/CALM2/FKBP1A/TIPRL/PPP1R1B/CALM3/LGALS3/PDGFRB/GNAI2/STYXL1/PPP1R12A/PPP6R3/ROCK1/SLC39A10/PPP6R2/ROCK2/FKBP1B/NUAK1/MGAT5/MTOR/HTT/PPP1R15A/RGN/PTPRC/PPP1R2/BOD1L1/PTPA/JAK2/CD300A/ITGA1/MASTL/PPP1R15B/PPP1R9B/PPP6R1
SC	GOBP_PROTEIN_EXPORT_FROM_NUCLEUS	57	0.559945	2.90937	0.00169205	0.00887008	AHCYL1/ANP32B/RAN/YWHAE/PARK7/CSE1L/TXN/NUTF2/XPO6/IFI27/NXT1/STRADB/GAS6/NUP214/BAG3/CAMK1/CDK5/RBM22/PTPN11/CALR/PPM1A/EMD/TPR/TCF7L2/XPO7/CHP1/SMURF1/RAPGEF3/HSPA9/PRKACA/UHMK1/DUSP16/RANBP3/RANBP3L/XPO4/FRAT1
SC	GOBP_PEPTIDYL_PROLINE_MODIFICATION	57	0.565693	2.93923	0.00169205	0.00887008	PPIG/PPIH/PRDX4/RANBP2/AIP/CWC27/P4HB/CRTAP/FKBP3/FKBP2/PPIA/PPIC/FKBP1A/PPIF/PPIB/EGLN2/PPIL1/FKBP9/NTMT1/P4HA1/NKTR/FKBP7/PIN4/PPIE/PPWD1/PIN1/FKBP4/PPIL4/FKBP8/FKBP1B/FKBP15/PPID/P4HA2/PTPA/P4HTM
SC	GOBP_REGULATION_OF_SUBSTRATE_ADHESION_DEPENDENT_CELL_SPREADING	57	0.571835	2.97114	0.00169205	0.00887008	CIB1/ITGB1BP1/CORO1C/RAC1/P4HB/ILK/S100A10/CRK/FERMT2/C1QBP/DAB2/ARPC2/ARHGEF7/MDK/TESK1/DMTN/ABL1/NRP1/MYOC/ACTN4/KANK1/CALR/LIMS2/FLNA/FBLN1/CRKL/GBP1/EFNA5/MYADM/SPRY4/CDC42/TRIOBP
SC	GOBP_TRANSCRIPTION_ELONGATION_FROM_RNA_POLYMERASE_II_PROMOTER	58	0.571423	2.98676	0.00169205	0.00887008	NELFE/LARP7/EAPP/PAF1/WDR61/POLR2I/ADRM1/RTF1/CTR9/ZMYND11/GTF2F2/SUPT4H1/CDK9/ENY2/HEXIM1/SUPT5H/CCNK/HNRNPU/GTF2F1/TCERG1/NELFB/ELL2/PCID2/ERCC3/EAF2/BRD4/WDR43/LDB1/CTNNB1/EAF1/ELOF1/SETD2/CCNT1/CBX7/ELP2/RNF168/NELFCD/AXIN1/SUPT16H
SC	GOBP_NEGATIVE_REGULATION_OF_MRNA_CATABOLIC_PROCESS	60	0.377119	1.99515	0.00171527	0.00887008	YBX1/CSDE1/HNRNPD/CIRBP/THRAP3/HNRNPC/NBAS/PABPC1/HNRNPAB/SYNCRIP/PAIP1/MAPK14/RBM10/LARP1/YBX3/DHX9/TARDBP/HNRNPU/TOB1/MAPKAPK2/HNRNPA0/MYD88/FMR1/LARP4B/ZFP36/SECISBP2
SC	GOBP_SNRNA_METABOLIC_PROCESS	60	0.377812	1.99882	0.00171527	0.00887008	LARP7/EXOSC4/NHP2/NOP10/MEPCE/SNAPC5/INTS12/EXOSC5/SNAPC2/DKC1/INTS5/USB1/TUT1/TOE1/EXOSC7/EXOSC8/ELL2/ZNF143/INTS10/ICE1/EXOSC9/EXOSC10/INTS1/CDK7/INTS9/EXOSC3/USPL1
SC	GOBP_REGULATION_OF_LIPID_CATABOLIC_PROCESS	60	0.389091	2.05849	0.00171527	0.00887008	RARRES2/ADRA2A/CDK4/LGALS12/PNPLA2/HCAR2/BSCL2/CIDEA/IDH1/TWIST1/LONP2/THRA/ABHD5/TYSND1/CRTC3/APOC1/AKT1/ABCD2/AADAC/PDE3B/SCARB1/FMC1/IRS2/ACACB
SC	GOBP_CIRCADIAN_REGULATION_OF_GENE_EXPRESSION	68	0.410632	2.23676	0.00171527	0.00887008	ATF4/CRY2/MYCBP2/KDM5A/PPP1CA/TOP1/HUWE1/HDAC3/PRMT5/BHLHE41/ID3/PPP1CB/CLOCK/HNRNPU/OGT/NRIP1/ID1/ID4/PER3/PPP1CC/ID2/CSNK1E/PER1/RBM4B/NR1D1/NCOA2/SIRT1/CRY1/NUDT12/MYBBP1A/EGR1/LGR4
SC	GOBP_INTRINSIC_APOPTOTIC_SIGNALING_PATHWAY_IN_RESPONSE_TO_ENDOPLASMIC_RETICULUM_STRESS	60	0.423312	2.23953	0.00171527	0.00887008	TMBIM6/WFS1/BOK/ATF4/CREB3/DDIT3/XBP1/PARK7/TXNDC12/GRINA/HERPUD1/SERINC3/BAG6/SYVN1/HSPA1A/CASP4/BCL2L1/BCL2/CEBPB/QRICH1/NCK1/ERP29/PTPN1/PPP1R15A/SIRT1/MAP3K5/AIFM1/TRAF2/OPA1/DAB2IP
SC	GOBP_ENDOCYTIC_RECYCLING	68	0.413918	2.25466	0.00171527	0.00887008	RAB7A/SNX17/ATP9A/VPS35/VPS51/SNX3/RAB11A/VPS29/WASH3P/SNX12/EHD2/VPS39/ARF6/EHD1/STX6/CCDC22/RAB14/RAB13/CMTM6/RAB11B/ATP6AP1/VPS26A/ZDHHC2/VPS52/SNF8/ARHGAP1/EHD4/SNX4/PTPN23/CCDC93/RAB8A/RAB35/DENND1B/ACAP2/KIAA1109/GGA3/ARL4C/ANKRD50
SC	GOBP_NEGATIVE_REGULATION_OF_ACTIN_FILAMENT_POLYMERIZATION	60	0.466669	2.46891	0.00171527	0.00887008	RDX/MTPN/PFN1/MKKS/FLII/CAPZB/SPTBN1/GSN/TMSB4X/ADD1/TWF2/PFN2/EPS8/CAPZA1/SPTAN1/DMTN/BBS4/TMSB10/CAPG/LMOD1/KANK1/TMOD1/KANK4/TWF1/KANK3/SVIL/SSH3/MYADM/TRIOBP/SLIT2
SC	GOBP_POSITIVE_REGULATION_OF_CELL_CYCLE_G1_S_PHASE_TRANSITION	60	0.466853	2.46989	0.00171527	0.00887008	APEX1/PHB2/RDX/UBE2E2/PAF1/DDRGK1/ANXA1/CPSF3/ANKRD17/CCND1/LSM10/KMT2E/AIF1/MEPCE/PLRG1/CCND2/EIF4G1/CCND3/TFDP1/EGFR/CUL4B/PAGR1/RGCC/AKT1/RRM1
SC	GOBP_REGULATION_OF_PROTEIN_DEACETYLATION	60	0.480045	2.53968	0.00171527	0.00887008	C6orf89/NDN/PINK1/BEX4/KDM5A/SAP30BP/ING2/BRMS1/BCL6/NIPBL/NNMT/CTBP1/WDR5/KAT14/SGF29/KAT2A/MBIP/APLNR/CAMK2D/SPRED2/FNTA/SREBF1/NEK3/SIRT1/SKI/AKAP8L/PRKD1/ZBTB7B/RRP8/CCAR2/SUV39H1/FRY/PRKD2
SC	GOBP_REGULATION_OF_NITRIC_OXIDE_METABOLIC_PROCESS	60	0.492912	2.60775	0.00171527	0.00887008	CD36/HSP90AB1/ATP2B4/CAV1/HSP90AA1/DDAH2/RAC1/ASS1/CLU/TSPO/AIF1/SMAD3/GLA/SIRPA/CD34/KLF2/PKD2/AKT1/ROCK2/INSR/DDAH1/CD47/KLF4/TICAM1/EDN1/RGN/TLR4/HBB/AGT/ACP5/KHSRP/JAK2
SC	GOBP_NEGATIVE_REGULATION_OF_CELL_SUBSTRATE_ADHESION	60	0.494348	2.61535	0.00171527	0.00887008	ITGB1BP1/CORO1C/RHOA/FZD4/HOXA7/APOD/MAP4K4/BCL6/PTEN/DMTN/DLC1/RASA1/MYOC/ACTN4/KANK1/THBS1/FBLN1/ADAM15/COL1A1/PIK3R1/DUSP22/GBP1/ACVRL1/EFNA5/FAM107A/NOTCH1/SPRY4/SPOCK1/TBCD/PHLDB2/CORO2B/MEN1/JAG1
SC	GOBP_NEGATIVE_REGULATION_OF_SMOOTH_MUSCLE_CELL_PROLIFERATION	60	0.496354	2.62596	0.00171527	0.00887008	RHOA/MFN2/SF1/GNA12/EFEMP2/ANG/APOD/NPR1/AIF1/CTNNBIP1/IGFBP3/PTEN/ADIPOQ/IGFBP5/GPER1/PPARG/NPR3/APOE/GNA13/PDCD4/MEF2C/TRIB1/NDRG2/OGN/CDKN1B/BMP2/CDKN1A/HMOX1/TPM1/MIR223/TNFAIP3/BMPR2
SC	GOBP_POSITIVE_REGULATION_OF_REACTIVE_OXYGEN_SPECIES_METABOLIC_PROCESS	68	0.489331	2.66545	0.00171527	0.00887008	SOD1/AKR1C3/CD36/GSTP1/CBR1/DCXR/TSPO/AKR1C1/LEP/PARK7/DHRS4/NFE2L2/ROMO1/TGFBR2/PID1/GRB2/PDGFRB/MAPK14/GNAI2/H19/CYBA/TYROBP/FOXO3/THBS1/MT-CO2/GADD45A/SLC5A3/RIPK1/ITGB2/CYP1B1/CDKN1A/TLR4/AGT/SNCA/PDGFB/SYK/AGTR1/ZNF205/RIPK3/ITGAM/CLCN3
SC	GOBP_CORTICAL_CYTOSKELETON_ORGANIZATION	60	0.513838	2.71846	0.00171527	0.00887008	RHOA/RAC1/PPP2R3C/RHOQ/VPS4A/RHOC/RHOBTB3/WDR1/EHD2/RHOG/ARF6/RHOD/TLN1/CDK5/EPB41L1/EPB41L3/RAB13/CALR/PDCD6IP/LCP1/ROCK1/PAFAH1B1/EZR/RHOB/RHOBTB1/PLEK/ROCK2/RND3/EPB41L2/PLEC/RAC2/AKAP11/FHOD1
SC	GOBP_ESTABLISHMENT_OF_PROTEIN_LOCALIZATION_TO_PLASMA_MEMBRANE	60	0.514549	2.72222	0.00171527	0.00887008	VAMP3/GORASP2/RAB10/OPTN/RAB7A/GOLGA4/VPS35/GOPC/SPTBN1/VAMP5/RACK1/RAB11A/RAB34/GOLGA7/RAB31/GOLPH3/ACSL3/VAMP4/SEC16A/ARFRP1/ATP6AP1/PKDCC/SYS1/CNST/ZDHHC2/ATP2C1/MACF1/GORASP1/AFDN/VAMP2/CSK/GOLPH3L/RAB8A/NSF/GGA3/KIF13A
SC	GOBP_MRNA_3_END_PROCESSING	60	0.518049	2.74074	0.00171527	0.00887008	AHCYL1/NELFE/NCBP2/SLBP/WDR33/PAF1/RNF20/CPSF3/FIP1L1/LSM10/PABPC1/YTHDC1/CTR9/RNF40/ZFP36L1/SSU72/CDK9/SNRPA/SUPT5H/CPSF7/HSF1/CPSF1/CLP1/RPRD2/RPRD1A/CSTF2T/TUT1/CSTF2/APP/ZC3H3/SCAF8/GRSF1
SC	GOBP_COLLAGEN_FIBRIL_ORGANIZATION	60	0.520809	2.75534	0.00171527	0.00887008	PXDN/FMOD/DPT/COL5A2/CRTAP/COL3A1/DDR2/EFEMP2/COL1A2/LUM/COL12A1/ADAMTS12/AEBP1/ADAMTS2/VIPAS39/LOX/SERPINH1/LOXL2/EXT1/P4HA1/COLGALT1/COL5A1/SFRP2/TNXB/LOXL4/TGFBR1/COL1A1/CHADL/LOXL1/CYP1B1/EMILIN1/RB1
SC	GOBP_AUTOPHAGOSOME_MATURATION	60	0.529225	2.79987	0.00171527	0.00887008	VCP/CHMP3/VTI1B/CHMP2A/CALM1/SNAPIN/TSG101/CHMP2B/VPS16/MAP1LC3B/ATG5/VAMP8/CHMP1A/PHF23/CHMP6/VAMP7/TBC1D25/MAP1LC3A/VIPAS39/WIPI2/CHMP5/UBQLN1/ADRB2/CHMP4A/ATG12/LAMP2/CHMP7/CHMP4B/VMP1/FYCO1/UVRAG/BECN1/PIK3R4/TMEM39A
SC	GOBP_POSITIVE_REGULATION_OF_NUCLEOCYTOPLASMIC_TRANSPORT	60	0.542762	2.87148	0.00171527	0.00887008	HSP90AB1/ANP32B/NCBP2/RAN/YWHAE/LEP/TRIM28/KHDRBS1/SMAD3/GAS6/HDAC3/BAG3/MAPK14/CAMK1/RBM22/DMAP1/HYAL2/DHX9/PPM1A/EMD/FLNA/TARDBP/TPR/TCF7L2/HCLS1/PIK3R1/JUP/IPO5/RAPGEF3/PRKACA/PRKD1/JAK2/PSEN1/CPSF6/XPO4/PRKCD/CDK1/GLI3/ZC3H12A
SC	GOBP_POSITIVE_REGULATION_OF_VIRAL_PROCESS	60	0.557751	2.95078	0.00171527	0.00887008	LGALS1/RAB7A/PPIH/SRPK2/P4HB/VPS4A/STAU1/HLA-DRB1/TOP2B/PPIA/TSG101/PABPC1/CD74/ATG5/MDFIC/KPNA2/RSF1/STOM/CNOT7/LARP1/SRPK1/ATG12/DHX9/KPNA6/AXL/CD4/PPIE/IFIT1/RAD23A/VAPB/TRIM21/NOTCH1/PPID/PKN2/FMR1/TMEM39A/LGALS9/CLEC4G
SC	GOBP_REGULATION_OF_ALTERNATIVE_MRNA_SPLICING_VIA_SPLICEOSOME	60	0.56073	2.96654	0.00171527	0.00887008	SAP18/RBFOX2/THRAP3/DDX5/CELF2/PUF60/SRSF2/RBM15B/DDX17/CELF1/YTHDC1/WTAP/KHDRBS1/FXR1/RBM25/RBM4/HNRNPA1/REST/PTBP1/MBNL1/SRSF6/RBM10/MAGOH/RBM8A/KHDRBS3/HNRNPU/TRA2B/NOVA1/FAM172A/MBNL2/ZBTB7A/RBM5/RBMX/TIA1/RNPS1/HNRNPL/FMR1/MBNL3
SC	GOBP_POSITIVE_REGULATION_OF_ACTIN_FILAMENT_BUNDLE_ASSEMBLY	60	0.56853	3.00781	0.00171527	0.00887008	LIMCH1/ITGB1BP1/RHOA/RAC1/PFN1/RHOC/S100A10/FERMT2/PFN2/SMAD3/SYNPO/SFRP1/TESK1/ABL1/NRP1/MYOC/BAG4/SORBS3/LPAR1/ID1/PXN/SYNPO2/SWAP70/TGFBR1/RGCC/PAK1/PLEK/ROCK2/RAPGEF3/ARHGEF15/FHOD1/MTOR/EVL/CD47/WNT11/CDC42/SDC4/TPM1/MTSS1/ARHGEF10L
SC	GOBP_REGULATION_OF_CELL_SUBSTRATE_JUNCTION_ORGANIZATION	68	0.576431	3.13989	0.00171527	0.00887008	LIMCH1/ITGB1BP1/POLDIP2/PTPRA/CORO1C/RHOA/LAMTOR2/RAC1/IQSEC1/APOD/S100A10/FERMT2/ACTG1/VCL/ARF6/SMAD3/MAP4K4/SFRP1/PTEN/SLK/THY1/DMTN/DLC1/ABL1/NRP1/MYOC/THBS1/ROCK1/PIK3R1/DUSP22/ROCK2/GPM6B/MACF1/ACVRL1/EFNA5/FAM107A/TEK/KDR/LDB1/MAPRE2/DAPK3/PHLDB2/SDC4/COL16A1
SC	GOBP_ENDOTHELIAL_CELL_APOPTOTIC_PROCESS	61	0.405448	2.14844	0.00172414	0.00887008	AKR1C3/NFE2L2/TNIP2/ANGPTL4/CD248/RAMP2/ECSCR/GAS6/ABL1/GPER1/CDH5/FOXO3/THBS1/RGCC/ANGPT1/PDCD4/HIPK1/TEK/KDR/MAP3K5/ANO6/CCL2/TNFAIP3/BMPR2/ICAM1/CD40/KRIT1/DAB2IP
SC	GOBP_NUCLEOSIDE_METABOLIC_PROCESS	61	0.414708	2.1975	0.00172414	0.00887008	DGUOK/NME4/ATIC/DNPH1/TK2/APRT/HPRT1/DERA/NT5C3A/CDADC1/MACROD1/ADK/APOBEC3C/TYMP/NUDT1/ADA/UCKL1/PRTFDC1/ICMT/PRPS1/ERH/OARD1/DTYMK/PRPS2/NT5E/ENPP4/NME5/UPP1
SC	GOBP_RESPONSE_TO_FATTY_ACID	61	0.427665	2.26616	0.00172414	0.00887008	AKR1C3/GNPAT/CD36/XRCC5/AKR1C2/LPL/ASS1/ACSL1/CDK4/AKR1C1/DGAT2/FOXO1/BAD/CAT/UCP2/PID1/ADIPOQ/ID3/ALAD/SCD/FOXO3/PDK4/HES1/SREBF1/PIK3CA/EDN1
SC	GOBP_NEURAL_NUCLEUS_DEVELOPMENT	61	0.432727	2.29299	0.00172414	0.00887008	DYNLL1/YWHAQ/COX6B1/RHOA/MAOB/CALM1/HSPA5/GLUD1/NFIB/CKB/YWHAE/YWHAH/ACTB/CALM2/NDUFS3/CALM3/MAPKAP1/ZNF148/SEC16A/BCL2/ALDH1A3/NDRG2/SEC24B/BASP1/CNP/ATF2/CDC42/HOXB2/G6PD/FGF2/S100A1
SC	GOBP_ENDOSOME_TO_LYSOSOME_TRANSPORT	61	0.443851	2.35193	0.00172414	0.00887008	VCP/CHMP3/RAB7A/SNAPIN/UBXN6/TSG101/CHMP2B/VPS16/BIN1/M6PR/RILP/VPS39/ARL8B/SORT1/AP3D1/VAMP7/HMGXB4/RAB7B/VIPAS39/ADRB2/HOOK2/MVB12A/TRAK1/RHOB/STX8/SCYL2/MTM1/VPS18/VPS41/AKTIP/LYST/SNX16/KIF13A
SC	GOBP_POSITIVE_REGULATION_OF_DEPHOSPHORYLATION	61	0.482492	2.55669	0.00172414	0.00887008	HSP90AB1/PPP2R5A/PINK1/PPP1R7/CALM1/GNA12/CAMTA1/CALM2/SMPD1/PPIA/CALM3/SMAD3/PDGFRB/DLC1/PTBP1/GBA/CDH5/PPP1R12A/ROCK1/PPP2R5D/SLC39A10/PIN1/PLEK/MEF2C/MTOR/BMP2/NSMF/PPP1R15A/RGN/PTPRC/PTPA/JAK2/RIPK3/CD300A/ITGA1/LILRB2/PRKCD
SC	GOBP_POSITIVE_REGULATION_OF_RESPONSE_TO_CYTOKINE_STIMULUS	61	0.492801	2.61131	0.00172414	0.00887008	RNF185/CPNE1/AGPAT2/TAF9/CASP1/AGPAT1/CD74/UBE2K/TRIM44/HSPA1A/CASP4/GAS6/LSM14A/FADD/DHX9/LAPTM5/PAFAH1B1/AXL/IL1R1/TRIM32/IRF7/RIPK1/CSF1/RIPK2/CXCR4/TREM2/EDN1/IRF3/IFIH1/TLR4/TICAM2/HSPA1B/LRRC70/TRAF2/DDX58
SC	GOBP_AMYLOID_BETA_METABOLIC_PROCESS	61	0.503496	2.66799	0.00172414	0.00887008	RTN4/RTN3/TMED10/NTRK2/CLU/BIN1/IGF1/SPON1/PICALM/APEH/NCSTN/EFNA1/APH1B/PSENEN/PSEN2/RELA/IFNGR1/MME/SP1/ROCK1/BACE2/APOE/PIN1/ROCK2/PRNP/RTN1/APH1A/BACE1/BECN1/CASP3
SC	GOBP_RESPONSE_TO_TYPE_I_INTERFERON	61	0.513954	2.7234	0.00172414	0.00887008	HSP90AB1/YTHDF2/RNF185/MUL1/STAT1/JAK1/SMPD1/IFITM3/IFI27/TREX1/UBE2K/IFITM2/IFITM1/CDC37/LSM14A/CNOT7/FADD/PTPN11/ISG15/SHMT2/USP18/IRAK1/IFIT1/IRF7/PTPN6/MYD88/PTPN1/IFNAR2/IRF3/SETD2/TYK2/CH25H/ADAR/TTLL12/YTHDF3
SC	GOBP_NUCLEOSIDE_TRIPHOSPHATE_BIOSYNTHETIC_PROCESS	61	0.557884	2.95618	0.00172414	0.00887008	VCP/DGUOK/NME4/STOML2/PINK1/ENO1/IMPDH2/ALDOA/NME2/NME3/NUDT2/NME1/TMSB4X/AK3/PID1/UCK1/PARP1/ATP6V0C/MT-ATP6/CMPK1/ADK/H19/AK1/IMPDH1/AK4/MT-CO2/UCKL1/DNAJC30/UQCC3/TBPL1/DTYMK/SLC25A13/MT-ATP8/NME5/TREM2/SLC25A12
SC	GOBP_REGULATION_OF_PROTEIN_IMPORT	61	0.572666	3.03451	0.00172414	0.00887008	PDCD5/CD36/HSP90AB1/HSPA8/RAN/SUMO1/TOMM70/LEP/APOD/PKIG/TRIM28/MDFIC/SMAD3/HDAC3/BAG3/MAPK14/RBM22/DMAP1/HYAL2/FLNA/TARDBP/TPR/HCLS1/PIK3R1/JUP/BMP4/ANGPT1/NUP54/UFM1/NOLC1/IPO5/CHP1
SC	GOBP_NEGATIVE_REGULATION_OF_PROTEOLYSIS_INVOLVED_IN_CELLULAR_PROTEIN_CATABOLIC_PROCESS	61	0.57752	3.06023	0.00172414	0.00887008	HSP90AB1/UBXN1/EIF3H/DDRGK1/PSMF1/GABARAPL2/PARK7/CAMLG/TAF9/RPS7/RPL11/UCHL5/WAC/F8A1/SDCBP/BAG6/RPL5/PDCL3/EFNA1/ALAD/HIPK2/USP7/GIPC1/OGT/BAG5/SMARCC1/SGTA/AQP11/N4BP1/MAP1A/TRIM39/USP14/RPL23/RYBP/TTC36/CSNK2A2/MTM1/F8A3/CCAR2/PSEN1/USP19
SC	GOBP_VESICLE_BUDDING_FROM_MEMBRANE	61	0.652722	3.45872	0.00172414	0.00887008	ANXA2/TMED10/RAB7A/PEF1/PREB/TFG/AP2M1/PPP6C/VAPA/VPS4A/SEC13/S100A10/SNX3/RAB1A/SAR1A/INSIG1/RILP/PICALM/CHMP6/AP3D1/GOLPH3/ARFGAP3/SEC31A/KLHL12/PDCD6/CHMP5/CHMP4A/SEC16A/GBF1/CHMP7/AP3B1/WASL/CHMP4B/TMED2/SCAP/ARFGAP2/CUL3/VAPB/SEC24C/SEC24B/FNBP1L/GOLPH3L/TMED9/SEC23B
SC	GOBP_MONOCYTE_CHEMOTAXIS	67	0.379136	2.05142	0.0017331	0.00887008	HMGB1/CREB3/ANXA1/RPS19/AIF1/FOLR2/CXCL12/LGALS3/NBL1/CCL13/CCL14/CTSG/CCL18/DUSP1/CCL3/CCL4/SLAMF8/CCL19/CXCL10/SLIT2/ANO6/CCR1/CCL2/PDGFB/CCL21/CCL23/CCL8/PLA2G7/LGMN/S100A12/CCL26
SC	GOBP_IMMUNOGLOBULIN_PRODUCTION_INVOLVED_IN_IMMUNOGLOBULIN_MEDIATED_IMMUNE_RESPONSE	67	0.385164	2.08403	0.0017331	0.00887008	NDFIP1/HSPD1/HLA-DRA/HLA-DRB1/HLA-DMA/B2M/PARP3/HLA-DPA1/HLA-DPB1/BCL6/HLA-DQB1/HMCES/NBN/HLA-DMB/UNG/KMT5B/TNFSF13/MLH1/HLA-DRB5/SWAP70/MAD2L2/ERCC1/THOC1/HLA-DQA1/STAT6/BATF/PTPRC/EXOSC3/HLA-DQA2/TFRC/TP53BP1/CD40/RNF168
SC	GOBP_REGULATION_OF_PROTEIN_MATURATION	67	0.390623	2.11357	0.0017331	0.00887008	ANXA2/ENO1/NOL3/GSN/CAST/TMEM59/S100A10/MYH9/PLGRKT/SPON1/SNX12/IFT52/RNF139/CARD16/GLG1/SOX4/THBS1/RPS6KA2/CLEC3B/CST7/GAS1/BCL2L12/PRNP/ANGPTL8/PRKACB/PRKACA/RHBDD1
SC	GOBP_METAPHASE_PLATE_CONGRESSION	67	0.407845	2.20676	0.0017331	0.00887008	CHMP3/CHMP2A/BOD1/DCTN2/VPS4A/NUDC/CHMP2B/RAB11A/KIF22/KPNB1/CHMP1A/CHMP6/EML3/PINX1/CHMP5/CHMP4A/CHMP7/HNRNPU/PDCD6IP/CHMP4B/CDC23/MLH1/EML4/CCNB1/CUL3/ZW10/NUMA1/BECN1/MAD1L1/RRS1/PIBF1/RMDN1/ANKRD53/GEM
SC	GOBP_MITOTIC_SPINDLE_ASSEMBLY	67	0.434015	2.34836	0.0017331	0.00887008	CHMP3/POLDIP2/CHMP2A/RHOA/BCCIP/DRG1/CHMP2B/RAB11A/SMC3/KPNB1/OFD1/CHMP1A/CHMP6/HSPA1A/LSM14A/EML3/CHMP5/CHMP4A/AAAS/CHMP7/FLNA/KIF3B/HNRNPU/PDCD6IP/TPR/CHMP4B/MAP9/SMC1A/KIF2A/STAG1/MZT1/PIBF1/CCDC61/HSPA1B/ZNF207
SC	GOBP_RNA_DEPENDENT_DNA_BIOSYNTHETIC_PROCESS	67	0.454834	2.461	0.0017331	0.00887008	CCT5/TCP1/XRCC5/HSP90AB1/HSP90AA1/RPA1/CCT7/CCT8/CCT6A/CCT4/PTGES3/TERF2IP/HNRNPC/NHP2/NOP10/TEN1/CCT3/HNRNPA1/TNKS1BP1/PINX1/DKC1/SMG5/HNRNPU/CCT2/GAR1/ACD/PNKP/RAD50/RFC1/TNKS2/NEK7/CTNNB1/EXOSC10/TELO2/HMBOX1/WRAP53/MAP3K4
SC	GOBP_POSITIVE_REGULATION_OF_PROTEIN_LOCALIZATION_TO_CELL_PERIPHERY	67	0.461198	2.49543	0.0017331	0.00887008	CIB1/KIF5B/PGRMC1/ITGB1/ATP2B4/RER1/SQSTM1/RANGRF/SPTBN1/RACK1/SORBS1/RHOG/ARF6/LGALS3/ACSL3/EGFR/GPER1/LRP1/RAMP3/EZR/ZDHHC5/CNST/ZDHHC2/ATP2C1/PIK3R1/AKT1/EPB41L2/CLIP3/PRNP/STX4/TREM2/NUMA1
SC	GOBP_PROTEIN_LOCALIZATION_TO_CELL_SURFACE	67	0.516075	2.79236	0.0017331	0.00887008	HSP90AB1/FBLN5/RANGRF/GOPC/RAB11A/TAX1BP3/VCL/COMMD1/ARF6/PICALM/PIGU/UNC50/TM9SF4/GPIHBP1/TYROBP/GBF1/FLNA/AP3B1/RAB11B/PIGK/JAM3/SNX33/LEPROT/ANGPT1/AKT1/MAP1A/GPM6B/GPD1L/SMURF1/STX4/CTNNB1/WNT11/NEDD4L/FGF7/RAB11FIP5/ANK2/FGF10/GGA3/TOR1A
SC	GOBP_REGULATION_OF_OXIDATIVE_STRESS_INDUCED_CELL_DEATH	67	0.568635	3.07675	0.0017331	0.00887008	SOD1/GPX1/PINK1/ATF4/HTRA2/P4HB/FYN/NOL3/HSPB1/PARK7/RACK1/TXN/NFE2L2/PPIA/FBXO7/NONO/PARP1/ABL1/REST/SFPQ/UBQLN1/FOXO3/TRAP1/BAG5/ENDOG/OXR1/LANCL1/FBXW7/GFER/AKT1/RIPK1/MCL1/NME5/TREM2/CTNNB1/SIRT1/TLR4/PDE8A
SC	GOBP_REGULATION_OF_CARTILAGE_DEVELOPMENT	63	0.428781	2.27003	0.00176991	0.00887008	EFEMP1/LEP/CTSK/ADAMTS12/SMAD3/MDK/POR/GLG1/PTPN11/LOXL2/ZNF219/KAT2A/PKDCC/ZBTB16/TGFBR1/MAF/BMP4/CHADL/FRZB/ACVRL1/BMP6/CTNNB1/BMP2/WNT11/LNPK/LTBP3/SNAI2/SMAD1/RARA/BMPR2/RARG
SC	GOBP_REGULATION_OF_CELLULAR_RESPONSE_TO_INSULIN_STIMULUS	63	0.471212	2.49467	0.00176991	0.00887008	LPL/MYO1C/LEP/INPP5K/SORBS1/ADIPOR1/PID1/USO1/NUCKS1/ATP2B1/OSBPL8/ECHDC3/PIP4K2B/GNAI2/TNS2/PTPN11/KANK1/GKAP1/PIP4K2A/SNX5/NCK1/ESRRA/NCOA5/PTPN1/IGF2/SIRT1/APPL2/GRB14/AGT/SOCS1/ZBTB7B/SOCS3/PIP4K2C/PTPRE/SLC27A4/PRKCD
SC	GOBP_POSITIVE_REGULATION_OF_OSTEOBLAST_DIFFERENTIATION	63	0.474448	2.5118	0.00176991	0.00887008	ATRAID/CLIC1/ILK/DDR2/FERMT2/IGF1/CTNNBIP1/CEBPA/IFITM1/FAM20C/CTHRC1/WWTR1/CEBPD/SFRP2/SUCO/YAP1/CEBPB/IL6ST/LRP3/JUND/BMP4/LRP5/MEF2C/BMP6/CTNNB1/BMP2/ACVR2A/PDLIM7/SMAD5/GDF10/ACVR1/SMAD1/PRKD1/FGF2/BMPR2/JAG1
SC	GOBP_GLUTATHIONE_METABOLIC_PROCESS	63	0.477339	2.52711	0.00176991	0.00887008	SOD1/GPX1/EEF1G/GPX4/ARL6IP5/GSTP1/GLO1/MGST2/CLIC1/PARK7/NFE2L2/GSTK1/GSTO1/GSTA4/ETHE1/GSTM4/IDH1/GLRX2/HPGDS/HAGH/GSTM5/PTGES2/CTNS/GSTM3/GSTM2/CHAC2/CLIC3/GSTT2B/G6PD/GSTM1/CLIC2/GGT7/GSTZ1/OPLAH
SC	GOBP_CELLULAR_RESPONSE_TO_VASCULAR_ENDOTHELIAL_GROWTH_FACTOR_STIMULUS	63	0.499504	2.64445	0.00176991	0.00887008	ITGB1BP1/ATP2B4/CD63/VEGFB/MYO1C/ANXA1/HSPB1/ADAMTS12/DCN/RAMP2/PDGFRB/MAPK14/NRP1/RELA/VEGFD/GAS1/MAPKAPK2/SPRY2/AKT1/SMOC2/NOTCH1/KDR/MAP2K3/PIK3CA/NRP2/VCAM1/PTP4A3/VEGFC/ADGRA2/PRKD1/TSPAN12/PDGFRA/NUS1/DAB2IP/PRKD2/MT1G/FOXC1/SPHK1/NR4A1
SC	GOBP_MAINTENANCE_OF_PROTEIN_LOCATION_IN_CELL	63	0.567506	3.00446	0.00176991	0.00887008	KDELR2/CAV1/OS9/PINK1/SKP1/RER1/HSPA5/TSPO/GSN/PARK7/ARL2BP/TXN/TMSB4X/KDELR3/GPAA1/INSIG1/TWF2/ARL2/GOLPH3/DBN1/CDK5/BBS4/TMSB10/TAF3/HK1/TOPORS/CHCHD10/HNRNPU/SUN2/TWF1/CD4/SUPT7L/SRGN/SUN1/AKT1/ANKRD13C/VPS13D/KDELR1/CIZ1
SC	GOBP_PROTEIN_TRANSMEMBRANE_TRANSPORT	63	0.594215	3.14587	0.00176991	0.00887008	SEC61B/TMED10/TIMM23/TOMM20/HSPD1/GRPEL1/HSPA5/TOMM22/DNAJC15/SEC61A1/SEC62/TOMM70/DNAJC19/CHCHD4/SRP54/PAM16/ZFAND2B/TRAM1/TIMM22/ROMO1/SEC61G/EDNRB/TOMM7/PEX10/SEC63/LONP2/PEX16/AZGP1/EDNRA/MCL1/TIMM17B/DNLZ/ABCA1/PEX14/TRAM2/TOMM40L/TIMM44/BCR/TIMM17A/AIFM1
SC	GOBP_T_CELL_MIGRATION	65	0.396074	2.12002	0.0017762	0.00887008	CD99/RHOA/XG/CD99L2/APOD/CRK/AIF1/CXCL12/MSN/PYCARD/OXSR1/ECM1/WNK1/FADD/TNFRSF14/STK39/S1PR1/APP/GPR183/CRKL/PLEC/CCL3/CD200/CXCL10/CCL2/ICAM1/CCL21/RIPK3
SC	GOBP_POSITIVE_REGULATION_OF_MONONUCLEAR_CELL_MIGRATION	65	0.401775	2.15054	0.0017762	0.00887008	HMGB1/RHOA/CREB3/CD99L2/C1QBP/AIF1/CXCL12/LGALS3/PYCARD/GAS6/OXSR1/WNK1/FADD/CALR/PDGFD/TNFRSF14/STK39/APP/CCL3/CCL4/CD47/CXCL10/ANO6/CCR1/LGALS9/CCL21/PLA2G7/AGER/LGMN
SC	GOBP_REGULATION_OF_INSULIN_RECEPTOR_SIGNALING_PATHWAY	65	0.41403	2.21614	0.0017762	0.00887008	CDK4/LEP/INPP5K/SORBS1/ADIPOR1/PID1/NUCKS1/SIK2/CCND3/OSBPL8/PIP4K2B/GNAI2/TNS2/PTPN11/KANK1/GKAP1/OGT/PIP4K2A/SNX5/PIK3R1/NCK1/SESN3/NCOA5/PTPN1/IGF2/SIRT1/GRB14/AGT/SOCS1/ZBTB7B/SOCS3/PIP4K2C/PTPRE/SLC27A4/PRKCD
SC	GOBP_LAMELLIPODIUM_ASSEMBLY	69	0.413935	2.25365	0.0017762	0.00887008	ITGB1/BRK1/WASF2/RAC1/CAPZB/CYFIP1/ABLIM1/ARPC2/ARHGEF7/VCL/TWF2/RHOD/ARHGEF6/GOLPH3/DMTN/WASF3/ABLIM3/TWF1/ACTR2/ACTR3/AKIRIN1/S1PR1/ARFIP2/PIK3R1/BIN3/NCK1/ABI3/RAC2/NUP85/MTOR/PIK3CA/CDC42/SLIT2/P2RY12
SC	GOBP_SMOOTH_MUSCLE_CELL_DIFFERENTIATION	65	0.45643	2.44308	0.0017762	0.00887008	MESP1/EFEMP2/ANKRD17/EDNRB/SGCB/ADM/RAMP2/TMEM204/ENG/GPER1/SIX1/RBPMS2/APLNR/ZEB1/BMP4/NFATC3/PDCD4/EDNRA/MEF2C/OLFM2/HEY1/HES1/NOTCH1/CTNNB1/SIRT1/NFATC1/NFATC2/ACVR1/SRF/PDGFB/FGF10
SC	GOBP_POSITIVE_REGULATION_OF_FAT_CELL_DIFFERENTIATION	65	0.466918	2.49922	0.0017762	0.00887008	RARRES2/ADIRF/LPL/CREBL2/XBP1/TFE3/CCDC3/METRNL/CEBPA/SFRP1/ZFP36L1/SAV1/MAPK14/PPARG/MEDAG/HNRNPU/SIX1/SFRP2/ZBTB16/CEBPB/CCDC71L/LMO3/ID2/LRP5/AKT1/PIM1/TMEM64/FRZB/CMKLR1/BMP2/AAMDC/SNAI2/ZFP36/ZBTB7B
SC	GOBP_SIGNAL_TRANSDUCTION_IN_ABSENCE_OF_LIGAND	65	0.478361	2.56047	0.0017762	0.00887008	CTNNA1/PPP2R1B/BOK/HTRA2/PRDX2/PPP2R1A/BAD/SRPX/PPP1CA/FGFR1/STRADB/MAP2K5/MKNK2/HSPA1A/BAG3/FADD/BCL2L1/FOXO3/ITGAV/ZC3HC1/WWOX/BCL2/MOAP1/AKT1/RIPK1/MCL1/IFI6/BCL2A1/SNAI2/BCL2L2/FGF10/EYA2/HSPA1B/KITLG
SC	GOBP_LYTIC_VACUOLE_ORGANIZATION	69	0.47806	2.60277	0.0017762	0.00887008	CHMP3/RAB7A/SNAPIN/TMEM9/PPT1/VPS35/LAMTOR1/SRPX/CHMP2B/CCDC115/TPP1/RAB34/RAB20/TREX1/GRN/ARL8B/MBTPS1/HEXB/ATP6AP2/RAB7B/NAGLU/HPS1/GBA/RAB14/LAPTM5/GAA/AP3B1/HOOK2/CORO1A/ACP2/TMEM175/TMEM165/ABCA1/MTOR/BECN1/TMEM199/VPS18/AKTIP/LYST
SC	GOBP_ENDOTHELIAL_CELL_DEVELOPMENT	69	0.507202	2.76143	0.0017762	0.00887008	GPX1/RDX/CLIC4/RAB1A/COL15A1/EDNRB/ADD1/VCL/MSN/PECAM1/CLDN5/FASN/TJP1/RAB1B/ROBO4/CDH5/TNFRSF1A/PPP1R12A/PDE2A/GSTM3/ROCK1/EZR/HEG1/VEZF1/RAPGEF1/CCM2/COL18A1/EDNRA/ROCK2/RAP1A/RAPGEF3/SOX18/AFDN/MYD88/MYADM/TJP2/ICAM1/NOTCH4
SC	GOBP_POSITIVE_REGULATION_OF_MITOCHONDRION_ORGANIZATION	69	0.507785	2.76461	0.0017762	0.00887008	PDCD5/MFF/PINK1/BOK/RALA/FIS1/SLC25A5/HTRA2/MUL1/VPS35/PARK7/BAD/FAM162A/VDAC1/PPIF/FBXO7/DCN/SLC25A4/ZDHHC6/PYCARD/BNIP3/GPER1/CIDEB/CHCHD10/TNFSF10/NMT1/MOAP1/RALBP1/KDR/TREM2/DNM1L/HTT/VPS13D/BID/MMP9/CAMKK2/GZMB/SPIRE1/ZNF205/PLAUR
SC	GOBP_RIBONUCLEOSIDE_TRIPHOSPHATE_METABOLIC_PROCESS	65	0.550302	2.94554	0.0017762	0.00887008	VCP/DGUOK/NME4/STOML2/PINK1/ENO1/RHOA/IMPDH2/ITPA/ALDOA/NME2/RHOQ/RAN/NME3/NUDT2/NME1/TMSB4X/AK3/PID1/GIMAP7/UCK1/PARP1/ATP6V0C/MT-ATP6/H19/IMPDH1/AK4/MT-CO2/UCKL1/DNAJC30/UQCC3/SLC25A13/MT-ATP8/NME5/TREM2/SLC25A12/EFL1/MYC
SC	GOBP_REGULATION_OF_MITOCHONDRIAL_MEMBRANE_POTENTIAL	65	0.569316	3.04732	0.0017762	0.00887008	VCP/SOD1/STOML2/UBB/PINK1/BOK/TUSC2/ARL6IP5/PPP2R3C/CLIC1/MUL1/TSPO/PRELID1/PARK7/BAD/RACK1/UCP2/PRDX3/SLC25A36/PID1/DCN/HEBP2/PARP1/ABL1/BNIP3/MYOC/BCL2L1/CTNS/BCL2/AKT1/IFI6/KDR/STOX1/PPA2/BID/MYC
SC	GOBP_CHAPERONE_MEDIATED_PROTEIN_FOLDING	69	0.585031	3.18517	0.0017762	0.00887008	PEX19/CCT5/TCP1/PDCD5/ST13/HSPA8/CCT7/DNAJB12/CCT8/CCT6A/CCT4/PTGES3/HSPA5/CLU/CRTAP/FKBP2/DNAJB1/HSPB1/FKBP1A/SDF2/PDIA4/PPIB/CD74/CCT3/HSPB6/HSPA1A/SDF2L1/HSPE1/PDCL3/DNAJC5/DNAJB6/HSPA14/CCT2/TRAP1/HSPH1/DNAJB2/FKBP4/UNC45A/FKBP1B/HSPA9/HSPA6/PPID/TOR2A/BAG1/TOR1B/HSPA13/HSPA1B/TOR1A
SC	GOBP_PROTEIN_K48_LINKED_UBIQUITINATION	65	0.598899	3.20566	0.0017762	0.00887008	UBE2R2/UBE2E3/UBE2H/UBE2D3/UBE2E2/GABARAP/SKP1/TTC3/UBE2D2/RBX1/PPIA/RNF5/UBE2Q2/RNF187/IFI27/UBE2K/RNF34/UBE2G1/BIRC2/UBE2D4/SYVN1/TRIM44/NMI/UBE2D1/CDC34/BFAR/RNF126/TOPORS/CUL1/UBE2E1/UBE3A/TRIM32/RNF216/CUL3/UBE2B/PELI1/UBE2G2/NEDD4L/RNF6/RNF146/UBE2A/BTRC/KBTBD7/TNFAIP3/UBE2T/AMFR
SC	GOBP_RIBOSOMAL_LARGE_SUBUNIT_BIOGENESIS	69	0.658003	3.58246	0.0017762	0.00887008	SNU13/MALSU1/EIF6/ZNF622/RPL3/MRPL20/MRPL1/RPL26L1/RPL35/GTF3A/RPLP0/RPL6/SDAD1/NHP2/NPM1/RPL7/NOP16/PAK1IP1/RPL7A/NSA2/RPL10/RPL11/DDX28/FTSJ3/RPF1/RPL10A/RPL5/LAS1L/EBNA1BP2/RSL24D1/RPL24/RPL35A/RPL26/WDR74/RPL14/RPF2/RSL1D1/DDX18/BOP1/TRAF7/DHX30/NIFK/PPAN/GTPBP4/RPL38/PES1/MAK16/RPL23A/RRS1/SURF6/MRTO4/NLE1
SC	GOBP_PROTEIN_LOCALIZATION_TO_ENDOPLASMIC_RETICULUM	69	0.685248	3.7308	0.0017762	0.00887008	RTN4/KDELR2/SEC61B/BTF3/SRP14/BCAP31/SPCS2/OS9/RAB10/RER1/HSPA5/SRP72/SEC61A1/SEC62/VAPA/DDRGK1/GABARAPL2/SRP54/SRPRB/ZFAND2B/TRAM1/ZFAND2A/KDELR3/GPAA1/INSIG1/SEC61G/SSR3/HERPUD1/SRP68/UBL4A/BAG6/SRP9/GET4/SEC63/SRPRA/BCAP29/CHMP4A/SEC16A/GBF1/SPCS3/CHMP4B/SGTA/MAN1A1/SPCS1/RAB3GAP1/TRAM2/ANKRD13C/UBAC2/PPP1R15A/KDELR1
SC	GOBP_DNA_DAMAGE_RESPONSE_SIGNAL_TRANSDUCTION_BY_P53_CLASS_MEDIATOR	70	0.390392	2.13278	0.00177936	0.00887008	PTTG1IP/TRIAP1/MIF/DDX5/COPS3/ATRX/PSMD10/SMYD2/ING4/CD44/CD74/NDRG1/KAT5/EEF1E1/NBN/TWIST1/SOX4/HIPK2/KDM1A/RPL26/FOXO3/SESN2/PLK2/CDKN1B/USP10/SPRED2/CDKN1A/MSX1/SIRT1/BCL3/BATF/SNAI2
SC	GOBP_PLATELET_AGGREGATION	70	0.408024	2.22911	0.00177936	0.00887008	GNAS/CLIC1/MYL12A/ILK/HSPB1/ACTB/PPIA/MYL9/MYH9/ACTN1/ACTG1/VCL/BLOC1S4/TLN1/DMTN/FIBP/FLNA/CD9/FN1/IL6ST/CTSG/STXBP1/SH2B3/PLEK/FERMT3/CSRP1/C1QTNF1/PTPN6/PEAR1/ADAMTS18/HBB/P2RY12/METAP1/PDGFRA/SYK/JAK2
SC	GOBP_CELLULAR_RESPONSE_TO_MECHANICAL_STIMULUS	70	0.414181	2.26274	0.00177936	0.00887008	MTPN/BAD/NFKB1/CASP1/AQP1/ENG/BAG3/BNIP3/HABP4/FADD/CYBA/TNFRSF1A/PDE2A/PIEZO1/GADD45A/SLC38A2/COL1A1/MAP3K2/MAP2K4/PLEC/BMP6/MYD88/ATP1A2/WNT11/DAG1/PTGER4/TLR4/AGT/CD40/MAP3K1/CRADD/MAPK3/F11R/CASP8AP2
SC	GOBP_GLOMERULUS_DEVELOPMENT	66	0.424358	2.27076	0.00177936	0.00887008	LAMB2/EDNRB/IQGAP1/PECAM1/MPV17/ADIPOQ/PDGFRB/WWTR1/EXT1/NID1/CD34/PDGFD/BCL2/BMP4/ANGPT1/EDNRA/MEF2C/SULF2/HES1/TEK/NOTCH1/ACTA2/BASP1/PODXL/ASXL1/NOTCH3/SULF1/NOTCH2/MTSS1/PDGFRA/EGR1/PDGFB/KLF15/LGR4/HEYL/JAG1
SC	GOBP_POSITIVE_REGULATION_OF_NIK_NF_KAPPAB_SIGNALING	66	0.439527	2.35194	0.00177936	0.00887008	PHB2/PHB/RHOA/ILK/TERF2IP/TRIP6/RBCK1/CD14/RPS3/TRADD/SASH1/TRIM44/C20orf27/NMI/EGFR/ACTN4/CALR/LAPTM5/RELA/IFI35/IRAK1/APP/PDCD4/TREM2/CCL19/EDN1/CD86/RC3H1/TLR4/PTP4A3/LGALS9
SC	GOBP_MITOTIC_CYTOKINESIS	70	0.45091	2.4634	0.00177936	0.00887008	CHMP3/POLDIP2/CHMP2A/JTB/RHOA/KLHDC8B/SNX9/ARF1/VPS4A/MYH10/SPTBN1/RHOC/CHMP2B/ARL3/CHMP1A/UNC119/CHMP6/SON/LZTS2/RASA1/BBS4/CHMP5/STAMBP/CHMP4A/CHMP7/PDCD6IP/ROCK1/CHMP4B/RHOB/SNX33/MAP9/ROCK2/CUL7
SC	GOBP_PROTEIN_N_LINKED_GLYCOSYLATION	70	0.463409	2.53169	0.00177936	0.00887008	DHDDS/MLEC/RPN2/DAD1/ALG5/OST4/UBE2J1/KRTCAP2/RPN1/DDOST/TMEM258/ALG3/OSTC/NUDT14/MGAT1/DPAGT1/ALG8/B4GALT7/ALG2/PMM1/DOLK/PGM3/TUSC3/MGAT4B/MPDU1/B4GALT1/ST3GAL1/GORASP1/MGAT5/TMEM165/SRD5A3/STT3A/GFPT2/STT3B
SC	GOBP_VASCULAR_ASSOCIATED_SMOOTH_MUSCLE_CELL_PROLIFERATION	70	0.46348	2.53207	0.00177936	0.00887008	POLDIP2/RHOA/MFN2/GNA12/EFEMP2/IGF1/MMP2/PTEN/ADIPOQ/IGFBP5/GNAI2/GPER1/PPARG/GNA13/PDCD4/MEF2C/CDKN1B/CDKN1A/EDN1/JUN/HPGD/MAP3K5/HMOX1/MEF2D/AGT/TPM1/GJA1/MMP9/MIR223/PDGFB/FGF2/FOXJ2/JAK2/FRS2/LDLRAP1
SC	GOBP_CELLULAR_ALDEHYDE_METABOLIC_PROCESS	66	0.47851	2.56054	0.00177936	0.00887008	ALDH9A1/AKR1C3/PNKD/ESD/DHRS4L2/GLO1/TALDO1/TPI1/HYI/AKR1C1/ADH5/TKT/GRHPR/PARK7/AKR7A2/DHRS4/ALDH1A1/DAB2/EDNRB/PDXK/ALDH2/IDH1/REST/HAGH/ALDH3A2/AKR1A1/IDH2/RDH11/ALDH1A3/BMP6/CYP1B1/ALPL/BMP2
SC	GOBP_REGULATION_OF_MEMBRANE_PERMEABILITY	70	0.475728	2.59899	0.00177936	0.00887008	VDAC2/BOK/BNIP3L/ACAA2/SLC25A5/MUL1/TMEM14A/NOL3/ALKBH7/BAD/PPIF/SLC25A4/HEBP2/HSPA1A/BNIP3/RHOT2/BCL2L1/LAPTM5/CHCHD10/PDCD6IP/NMT1/BCL2/RASIP1/HEG1/JAM3/MOAP1/RHOT1/MTOR/CNP/ATF2/BLOC1S2/BID/GZMB/TJP2/BCL2L2/EYA2/ZNF205/HK2/LAPTM4B/SLC35F6
SC	GOBP_REGULATION_OF_INTRACELLULAR_STEROID_HORMONE_RECEPTOR_SIGNALING_PATHWAY	70	0.488034	2.66622	0.00177936	0.00887008	PHB2/PHB/RHOA/UFSP2/PRMT2/DDX5/DDRGK1/CRY2/PARK7/UBA5/DAB2/AR/SFRP1/PARP1/WBP2/UFL1/CALR/KDM1A/CLOCK/YAP1/PAGR1/PAK1/LMO3/ZBTB7A/UFM1/PER1/CNOT2/CNOT1/SIRT1/CRY1/RNF6/NCOR2/VPS18/HEYL/KANK2/RNF14/HDAC1/NCOR1
SC	GOBP_MODULATION_BY_HOST_OF_SYMBIONT_PROCESS	66	0.504685	2.7006	0.00177936	0.00887008	PHB/HSPA8/SNW1/PSMC3/VAPA/CAV2/INPP5K/SAP30BP/PPIB/CFL1/IFI27/PC/RAB9A/NUCKS1/TAF11/STOM/CSF1R/REST/CDK9/ZBED1/TARDBP/CCNK/EIF2AK4/SP1/APOE/RRP1B/CCL3/CCL4/FMR1/JUN/ZNF502/CCNT1/CHD1
SC	GOBP_PROTEIN_LOCALIZATION_TO_VACUOLE	66	0.516608	2.7644	0.00177936	0.00887008	RTN4/LAMTOR4/CD81/SH3GLB1/HSPA8/RAB7A/CLU/VPS4A/NCOA4/VPS25/LAMTOR5/M6PR/WASH3P/MFSD1/SORT1/AP3D1/VPS37A/VPS28/LAPTM5/LAMP2/AP3B1/GPR137B/KPTN/SNF8/GBP1/ROCK2/SMURF1/SH3BP4/STAM/HGS/PTPN23/PIK3R4/VPS13D/GLMP/VPS37C/AP3M1/VPS41/TNFAIP3/GGA3/SNX16/VPS13A/SCARB2
SC	GOBP_CELLULAR_GLUCAN_METABOLIC_PROCESS	70	0.511776	2.79592	0.00177936	0.00887008	UGP2/GYG2/PTGES3/PYGL/GBE1/STBD1/PYGB/INPP5K/SORBS1/IGF1/ACADM/PPP1CA/STK40/PPP1R1A/POMC/PPP1CB/GAA/GYS1/AGL/PHLDA2/RB1CC1/IL6ST/PPP1CC/AKT1/PCDH12/INSR/EPM2AIP1/PHKB/KHK/IGF2/GYG1/IRS2/NR1D1/PHKA2/PPP1R2/DYRK2/PPP1R3C
SC	GOBP_MITOCHONDRIAL_TRANSLATION	70	0.62105	3.39291	0.00177936	0.00887008	MRPL47/MALSU1/MRPS14/MRPL2/MRPS18A/MTIF3/MRPS24/MRPS21/TUFM/MRPL51/COA3/MRPS2/MRPL16/MRPL58/MRPS34/UQCC2/RCC1L/TRMT10C/C1QBP/MRPS12/MRPS16/MRPS18B/MRPS6/MRPS15/MTG1/MRPL23/MRPS11/MTRF1L/IARS2/MRPL57/WARS2/MRPS7/MPV17L2/MRPS28/SHMT2/RARS2/NOA1/TSFM/NGRN/NDUFA7/LRPPRC/ALKBH1/MRPS27/TACO1/SARS2/RPUSD3/GATB/CDK5RAP1/MTIF2/FASTKD3/YARS2
SC	GOBP_RIBOSOMAL_SMALL_SUBUNIT_BIOGENESIS	70	0.623924	3.40861	0.00177936	0.00887008	SNU13/XRCC5/EMG1/RPS6/RIOK1/RPS19/NGDN/RPS5/NPM1/RPSA/WDR46/ERAL1/RPS8/RPS7/RPS15/NOB1/TSR3/ABT1/LTV1/RPS16/RPS17/LSM6/MRPS11/RPS28/RPS14/GTF2H5/RPP40/MRPS7/RPS24/RPS25/RRP36/PRKDC/RPS27/TSR2/NOL10/RPS21/UTP3/BYSL/TBL3/RPL38/NOL11/RIOK3/RRS1/UTP4/SURF6/RPS27L
SC	GOBP_NEGATIVE_REGULATION_OF_CALCIUM_ION_TRANSPORT	62	0.408106	2.16277	0.00178253	0.00887008	C4orf3/TMBIM6/CALM1/ADRA2A/SRI/YWHAE/CALM2/INPP5K/GSTO1/FKBP1A/BIN1/VDAC1/CALM3/SESTD1/UBQLN1/BCL2/GSTM2/REM1/PKD2/TRDN/FKBP1B/TRIM27/SLC30A1/HES1/ATP1A2/FMR1/PACSIN3/PLN/GEM/RRAD/CLIC2/LILRB2
SC	GOBP_POSITIVE_REGULATION_OF_DNA_RECOMBINATION	64	0.407038	2.16547	0.00178253	0.00887008	MORF4L1/MORF4L2/ACTB/MEAF6/KAT5/VPS72/PARP1/HMCES/WDR48/DMAP1/KMT5B/TNFSF13/MLH1/MRGBP/ACTR2/ZCWPW1/MAD2L2/RBBP8/MMS19/UBE2B/YEATS4/ACTL6A/ING3/STAT6/RUVBL2/PTPRC/EXOSC3/EPC2/TFRC/WRAP53/TP53BP1/CD40
SC	GOBP_CHOLESTEROL_EFFLUX	62	0.409695	2.17119	0.00178253	0.00887008	CAV1/NR1H3/NPC2/CES1/LAMTOR1/EEPD1/NAXE/STX12/PLTP/GPS2/ADIPOQ/TSKU/LRP1/PPARG/NR1H2/NFKBIA/ABCA5/APOE/APOC1/SREBF2/RXRA/APOM/SCARB1/TREM2/ABCA1/SIRT1
SC	GOBP_REGULATION_OF_DOUBLE_STRAND_BREAK_REPAIR_VIA_HOMOLOGOUS_RECOMBINATION	62	0.422162	2.23727	0.00178253	0.00887008	MORF4L1/MORF4L2/MAGEF1/TERF2IP/ACTB/MEAF6/RPA2/KAT5/VPS72/PARP1/WDR48/DMAP1/KDM1A/SPIDR/PPP4C/MRGBP/ACTR2/MAD2L2/RBBP8/MMS19/YEATS4/ACTL6A/ING3/RUVBL2/SETD2/EPC2/SIRT6/WRAP53/TP53BP1/SMCHD1
SC	GOBP_HETEROTYPIC_CELL_CELL_ADHESION	62	0.427794	2.26711	0.00178253	0.00887008	ITGB1/FLOT1/FLOT2/PARVA/ITGA7/CD44/CD58/MAP2K5/PERP/NINJ1/ADIPOQ/THY1/SIRPA/WNK1/ITGAV/JAM3/ITGA5/JUP/ITGB2/CD2/CD47/KLF4/CD200/MYADM/VCAM1/NRCAM/IL1RN/PTPRC/GLDN/AGER/LILRB2/MBP
SC	GOBP_HEART_VALVE_DEVELOPMENT	64	0.469239	2.49638	0.00178253	0.00887008	RBPJ/HECTD1/TGFBR2/SLIT3/TWIST1/SOX4/EFNA1/TNFRSF1A/PDE2A/ROCK1/APLNR/BMP4/OLFM1/MEF2C/ROCK2/EMILIN1/HEY1/NOTCH1/RB1/TNFRSF1B/MTOR/BMP2/GJA5/NFATC1/SLIT2/FGFRL1/SNAI2/ACVR1/NOTCH2/HEYL/BMPR2/JAG1/ELN
SC	GOBP_STEROL_BIOSYNTHETIC_PROCESS	64	0.476085	2.53281	0.00178253	0.00887008	SOD1/FDFT1/ACAA2/NSDHL/CYB5R1/CES1/TM7SF2/CYB5R3/EBP/PMVK/INSIG1/FDPS/ACLY/MBTPS1/DHCR7/POR/DHCR24/FGF1/ERLIN1/IDI1/APOE/SCAP/LSS/ARV1/SREBF1/LBR/PLPP6/ERLIN2/G6PD/LPCAT3/CH25H/SQLE/INSIG2
SC	GOBP_AMYLOID_PRECURSOR_PROTEIN_CATABOLIC_PROCESS	62	0.484702	2.5687	0.00178253	0.00887008	RTN4/RTN3/TMED10/NTRK2/CLU/FLOT2/FKBP1A/BIN1/IGF1/SPON1/PICALM/NCSTN/EFNA1/APH1B/DHCR24/PSENEN/PSEN2/RELA/IFNGR1/RANBP9/SP1/ROCK1/APOE/PIN1/ROCK2/PRNP/RTN1/APH1A/BACE1/CASP3
SC	GOBP_MEMBRANE_BIOGENESIS	62	0.489148	2.59226	0.00178253	0.00887008	CHMP3/ANXA2/RFTN1/CAV1/CHMP2A/FLOT1/NSFL1C/VPS4A/SPTBN1/BANF1/CAV2/S100A10/CHMP2B/FLOT2/CHMP1A/PICALM/CHMP6/PTEN/SERINC1/CHMP5/CHMP4A/PEX11A/UBE2I/REEP3/CHMP7/CHMP4B/PEX16/REEP4/CLIP3/STX4/PACSIN2
SC	GOBP_POSITIVE_REGULATION_OF_BLOOD_VESSEL_ENDOTHELIAL_CELL_MIGRATION	64	0.502003	2.67069	0.00178253	0.00887008	CIB1/HMGB1/STAT5A/ANXA1/HSPB1/NFE2L2/SRPX2/TMSB4X/FGFR1/MAPK14/ABL1/NRP1/THBS1/HDAC7/SP1/MAP3K3/PLK2/ANGPT1/AKT1/KDR/MAP2K3/SIRT1/HMOX1/VEGFC/PRKD1/PDGFB/FGF2/RHOJ/CD40/NUS1/PRKD2
SC	GOBP_CELLULAR_RESPONSE_TO_HEAT	64	0.513374	2.73118	0.00178253	0.00887008	VCP/HSP90AB1/HSP90AA1/HTRA2/SUMO1/YWHAE/DNAJB1/EIF2S1/HIKESHI/DAXX/SLU7/STUB1/HSBP1/HSPA1A/BAG3/ZFAND1/PDCD6/HSBP1L1/DNAJB6/CD34/THBS1/FGF1/SCARA5/TPR/HSF1/IRAK1/MAPKAPK2/PRKACA/IER5/HSPA6/MTOR/SIRT1/CXCL10/HMOX1
SC	GOBP_MRNA_EXPORT_FROM_NUCLEUS	62	0.538556	2.8541	0.00178253	0.00887008	NCBP2/THOC7/IWS1/SRSF3/RBM15B/SARNP/ALKBH5/DDX19B/NXT1/YTHDC1/PABPN1/POLDIP3/UPF2/DDX39B/CHTOP/RAE1/AGFG1/NUP214/DDX39A/ZC3H11A/SMG7/ENY2/SMG5/THOC2/GLE1/TPR/HNRNPA2B1/PCID2/UPF1/THOC1/NUP85/NXF1/ALYREF/MCM3AP/THOC6/AKAP8L/SETD2
SC	GOBP_REGULATION_OF_STEROID_BIOSYNTHETIC_PROCESS	71	0.388575	2.1279	0.00179211	0.00887008	SOD1/AKR1C3/CES1/SF1/TSPO/ASAH1/LEP/NFKB1/INSIG1/DAB2/ADM/MBTPS1/DHCR7/POR/REST/IGFBP7/FGF1/ERLIN1/APOE/SCAP/BMP6/ATP1A1/BMP2/SREBF1/H6PD/NR1D1/SIRT1/SNAI2/EGR1/ERLIN2/LPCAT3
SC	GOBP_NEGATIVE_REGULATION_OF_ERK1_AND_ERK2_CASCADE	71	0.407096	2.22932	0.00179211	0.00887008	ITGB1BP1/PHB/EIF3A/GSTP1/TIMP3/TNIP1/DAB2/DUSP6/SLC9A3R1/PTEN/ADIPOQ/ABL1/GPER1/SIRPA/RANBP9/SPRY1/FBLN1/EZR/LMO3/PIN1/SPRY2/GBP1/NDRG2/DUSP4/EMILIN1/ERRFI1/PTPN1/SPRED2/CSK/TLR4/SPRY4/PTPRC
SC	GOBP_CELLULAR_RESPONSE_TO_IONIZING_RADIATION	71	0.425281	2.3289	0.00179211	0.00887008	XRCC6/XRCC5/HSPA5/CRYAB/EEF1D/MGMT/TMEM109/SWI5/HRAS/TREX1/GRB2/NUCKS1/SFRP1/NIPBL/TNKS1BP1/MAPK14/GTF2H5/CYBA/KDM1A/BCL2L1/RPL26/IFI16/CLOCK/SPIDR/SFRP2/HSF1/GADD45A/YAP1/RHOB/NET1/TANK/BRCC3/CDKN1A/SIRT1/SNAI2/EGR1/TP53BP1/TSPYL5
SC	GOBP_CELL_MIGRATION_INVOLVED_IN_SPROUTING_ANGIOGENESIS	71	0.50135	2.74547	0.00179211	0.00887008	CIB1/ITGB1BP1/ITGB1/RHOA/ANXA1/PDCD10/SRPX2/MMRN2/MAP2K5/CLEC14A/ABL1/NRP1/THBS1/HDAC7/MAP3K3/PLK2/FBXW7/AKT1/MEOX2/STARD13/NOTCH1/HDAC5/KDR/KLF4/EFNB2/HMOX1/SLIT2/SRF/FGF2/RHOJ
SC	GOBP_POSITIVE_REGULATION_OF_MACROAUTOPHAGY	71	0.534056	2.92457	0.00179211	0.00887008	SH3GLB1/PINK1/OPTN/BNIP3L/SLC25A5/RALB/VDAC1/WAC/DCN/SLC25A4/SCOC/PIP4K2B/BAG3/SESN1/BNIP3/LARP1/MAP3K7/ADRB2/SUPT5H/HSPB8/SESN2/PIP4K2A/MOAP1/FYCO1/RIPK2/WIPI1/SESN3/UVRAG/SNX4/RAB3GAP1/IKBKG/KDR/SNX7/HTT/BECN1/SNX18/SIRT1/VPS13D/HMOX1/C9orf72/WDR45/TRIM13/RNF31/NOD1/ULK1/PAFAH1B2/RAB3GAP2/PIP4K2C
SC	GOBP_SPLICEOSOMAL_COMPLEX_ASSEMBLY	71	0.564498	3.09128	0.00179211	0.00887008	DDX1/SNRPC/SRPK2/SNRPD2/PRPF6/SNRPG/SNRPE/SF1/NOL3/CELF2/LUC7L3/SLU7/PUF60/SF3B1/SRSF9/CELF1/YTHDC1/SF3A1/SRSF10/DDX39B/SF3A3/SRSF1/SRSF6/SETX/SRPK1/DDX23/SNRNP200/TXNL4A/CRNKL1/SRSF5/SCAF11/USP39/LUC7L2/RBM5
SC	GOBP_SELECTIVE_AUTOPHAGY	71	0.596234	3.26507	0.00179211	0.00887008	PHB2/PINK1/OPTN/RAB7A/MFN2/SQSTM1/SLC25A5/HTRA2/UFC1/STBD1/DDRGK1/AUP1/VDAC1/UBA5/MAP1LC3B/ATG5/TOMM7/SLC25A4/TEX264/LGALS8/HUWE1/CDC37/UFL1/BAG3/WIPI2/UBQLN1/ADRB2/ATG4B/HSPB8/SESN2/RB1CC1/ARFIP2/RIPK2/UFM1/C5orf51/USP30/HTT/ATG13/BECN1/VPS13D/ATG4D/RNF213/RNF31/WDR81/NOD1/ULK1
SC	GOBP_REGULATION_OF_STEROL_TRANSPORT	72	0.372466	2.05022	0.00179856	0.00887008	ANXA2/CAV1/NR1H3/CES1/TSPO/LAMTOR1/EEPD1/NAXE/LEP/NFKB1/PLTP/GPS2/ADIPOQ/SCP2/LRP1/PPARG/NR1H2/FURIN/NFKBIA/ABCA5/APOE/APOC1/SREBF2/RXRA/ARV1/TREM2/ABCA1/SIRT1/ZDHHC8/LPCAT3/NUS1/LDLRAP1/SEC24A
SC	GOBP_NEGATIVE_REGULATION_OF_INNATE_IMMUNE_RESPONSE	72	0.407829	2.24488	0.00179856	0.00887008	YTHDF2/SERPING1/NR1H3/MUL1/A2M/BANF1/HLA-E/RPS19/CRK/HLA-A/HLA-B/LYAR/TREX1/GRN/VSIG4/NMI/CNOT7/PPARG/ISG15/IFI16/HLA-F/NR1H2/USP18/GFER/TRIM21/SLAMF8/TRAFD1/LGALS9/NLRX1/TNFAIP3/MICA/ADAR/TTLL12/YTHDF3
SC	GOBP_CELLULAR_EXTRAVASATION	72	0.418761	2.30505	0.00179856	0.00887008	ITGB1/CD99/XG/CD99L2/LEP/CRK/CXCL12/PECAM1/GOLPH3/MDK/THY1/LYVE1/SIRPA/FADD/EXT1/PDGFD/ROCK1/PLVAP/IL1R1/JAM3/CRKL/BST1/SELPLG/SELP/CD47/PTGER4/VCAM1/ST3GAL4/BCR/CCL2/PODXL2/ICAM1/CHST2/CCL21/RIPK3/ELANE/SELL/ITGA1/AGER
SC	GOBP_MYELOID_CELL_DEVELOPMENT	72	0.420397	2.31406	0.00179856	0.00887008	ANXA2/WASF2/RPS6/ARID4A/FAM210B/LYAR/FBN1/BPGM/BCL6/CITED2/ALAS1/DMTN/FAM20C/PTPN11/TYROBP/ADGRF5/ABI1/ATP6AP1/PAFAH1B1/PIP4K2A/KLF2/SH2B3/FBXW7/APP/ZBTB7A/PTPN6/EVI2B/FLI1/SRF/NOTCH2/G6PD/SLC9B2/PTBP3/TSPAN2/MEIS1/EPB42/ALAS2/MAEA/MED1
SC	GOBP_NEUROTRANSMITTER_TRANSPORT	205	-0.274972	-1.59248	0.00181928	0.00887008	CASK/SLC1A2/SLC1A6/RAB3B/NOS1/SYT11/SLC4A8/GFAP/SLC6A4/SV2C/FBXL20/CHRNB4/CHRNA5/CADPS/SLC6A1/SV2B/SLC38A1/APBA1/KCNMB4/RIMS2/SYT5/UNC13C/SLC28A2/SLC6A11/SYP/P2RX7/RPH3A/ADCY1/SYT12/DOC2A/SV2A/CACNB2/UNC13A/GDNF/KCNJ10/GRM4/STX1B/CAMK2A/WNT7A/CLN8/RIMS1/SLC22A2/HTR2A/SYT2/CHRNA3/ERC2/SYT9/CPLX4/SYT1/SLC6A17/NRXN2/SLC6A12/CPLX2/DOC2B/KMO/STXBP3/SLC18A1/CHRNA6/GABRQ/DRD2/DDC/SLC6A3/SLC22A1/SYN3/RIM…
SC	GOBP_POSITIVE_REGULATION_OF_DNA_BIOSYNTHETIC_PROCESS	73	0.374097	2.04873	0.00182815	0.00887008	CCT5/TCP1/XRCC5/HSP90AB1/HSP90AA1/CCT7/CCT8/CCT6A/CCT4/PTGES3/PCNA/CCT3/HNRNPA1/PDGFRB/DKC1/PARM1/CCT2/CHTF8/RGCC/GFER/ACD/PNKP/SMOC2/TNKS2/CYP1B1/NEK7/CTNNB1/KLF4/RFC3/RFC4/MYC/HMBOX1/PDGFB/FGF2/WRAP53/MAP3K4
SC	GOBP_REGULATION_OF_GLUCOSE_TRANSMEMBRANE_TRANSPORT	73	0.379985	2.08098	0.00182815	0.00887008	GPC3/RHOQ/PEA15/CREBL2/LEP/NFE2L2/INPP5K/SORBS1/IGF1/FABP5/PID1/ARPP19/C3/OSBPL8/ADIPOQ/MAPK14/PTPN11/MEF2A/PIK3R1/AKT1/EDNRA/CLIP3/INSR/IRS2/EDN1/APPL2/MYC/APPL1/MIR223/SIRT6/KLF15
SC	GOBP_POLYSACCHARIDE_BIOSYNTHETIC_PROCESS	73	0.399467	2.18767	0.00182815	0.00887008	UGP2/GYG2/PTGES3/GBE1/B4GAT1/INPP5K/SORBS1/NFKB1/IGF1/CLTC/ACADM/PPP1CA/PPP1CB/EXT1/GYS1/AGL/AKT1/INSR/B3GNT2/EPM2AIP1/IGF2/GYG1/IRS2/NR1D1/B4GALT5/HS2ST1/DYRK2/B3GNT9/NDST2/PDGFB/PPP1R3C
SC	GOBP_HISTONE_H4_ACETYLATION	73	0.421202	2.3067	0.00182815	0.00887008	MORF4L1/MORF4L2/PIH1D1/MCRS1/IWS1/ACTB/MEAF6/ING4/TAF7/ATG5/KAT5/VPS72/NAA50/NCOA1/USP22/JADE1/CTBP1/DMAP1/WDR5/OGT/KAT2A/PHF20/MRGBP/PER1/HCFC1/YEATS4/MSL3/ACTL6A/ING3/APBB1/RUVBL2/ATF2/SIRT1/KANSL2/EPC2/MSL1
SC	GOBP_ARTERY_MORPHOGENESIS	73	0.441084	2.41559	0.00182815	0.00887008	RBPJ/COL3A1/EFEMP2/MDK/CITED2/ENG/PDGFRB/SOX4/LRP1/NRP1/ZMIZ1/ADGRF5/SIX1/PRRX1/TGFBR1/PKD2/APOE/BMP4/EDNRA/SEC24B/NPRL3/ACVRL1/HEY1/HES1/NOTCH1/WNT11/EFNB2/GJA5/EDN1/HPGD/NOTCH3/SRF/BMPR2/JAG1
SC	GOBP_NEGATIVE_REGULATION_OF_RESPONSE_TO_DNA_DAMAGE_STIMULUS	73	0.452046	2.47562	0.00182815	0.00887008	PTTG1IP/TPT1/MAGEF1/TRIP12/CLU/TRIAP1/MIF/PSMD10/TAF9/RPS3/CD44/CD74/NUDT16L1/CXCL12/ING2/USP47/DDX39B/TWIST1/KDM1A/BCL2L1/XRCC1/TFIP11/TAF9B/SFRP2/HSF1/BCL2/CDKN2D/TMEM161A/MAD2L2/TRIM32/ERCC1/THOC1/SIRT1/PPP1R10/SNAI2/BID/CCAR2/TP53BP1/ACKR3/SMCHD1
SC	GOBP_ENDOPLASMIC_RETICULUM_UNFOLDED_PROTEIN_RESPONSE	73	0.563117	3.0839	0.00182815	0.00887008	VCP/SERP1/WFS1/OS9/BOK/HSPA5/ATF4/CREB3/DDIT3/DDRGK1/RHBDD2/XBP1/EIF2S1/RACK1/NFE2L2/CCND1/STUB1/DERL1/ERLEC1/DERL2/HERPUD1/MBTPS1/UFL1/BFAR/DNAJB9/CDK5RAP3/ATF6/TMED2/PIK3R1/QRICH1/NCK1/FICD/VAPB/SERP2/PARP16/CREB3L2/PTPN1/PPP1R15A
SC	GOBP_NEGATIVE_REGULATION_OF_CELLULAR_PROTEIN_CATABOLIC_PROCESS	73	0.578952	3.17062	0.00182815	0.00887008	ANXA2/HSP90AB1/ATRAID/UBXN1/EIF3H/VPS35/DDRGK1/PSMF1/GABARAPL2/PARK7/CAMLG/TAF9/RPS7/RPL11/UCHL5/WAC/F8A1/SDCBP/BAG6/RPL5/PDCL3/EFNA1/ALAD/HIPK2/USP7/CDK5RAP3/GIPC1/OGT/FURIN/BAG5/SMARCC1/SGTA/AQP11/N4BP1/MAP1A/TRIM39/USP14/RPL23/RYBP/TTC36/CSNK2A2/RIC1/MTM1/F8A3/CCAR2/PSEN1/LAPTM4B/USP19/DAB2IP/USP25
SC	GOBP_B_CELL_ACTIVATION_INVOLVED_IN_IMMUNE_RESPONSE	82	0.338627	1.9156	0.00183824	0.00887008	NDFIP1/LGALS1/HSPD1/XBP1/PARP3/ITM2A/DOCK11/BCL6/HMCES/NBN/ABL1/UNG/KMT5B/ADA/TNFSF13/MFNG/MLH1/SWAP70/MAD2L2/IRF8/ERCC1/GPR183/THOC1/PLCL2/ST3GAL1/STAT6/ITFG2/BCL3/TLR4/BATF/PTPRC/EXOSC3/NOTCH2/TFRC/TP53BP1/CD40
SC	GOBP_REGULATION_OF_MUSCLE_ADAPTATION	82	0.387296	2.19092	0.00183824	0.00887008	ATP2B4/MTPN/YY1/NOL3/TOMM70/FOXO1/LMNA/AIF1/IGF1/SMAD3/PARP1/IGFBP5/PPARG/CDK9/TNFRSF1A/FOXO3/LMCD1/ROCK1/TWF1/IL6ST/PPP3CA/PARP2/MEF2A/GLRX3/ROCK2/PI16/CAMK2D/RGS2/NOTCH1/ERRFI1/TNFRSF1B/DAG1/BECN1/EDN1/AGT
SC	GOBP_MICROTUBULE_POLYMERIZATION	82	0.417775	2.36333	0.00183824	0.00887008	MAP1B/RAC1/RANGRF/DRG1/TUBG2/MAPRE1/RPS3/DCTN1/ARL3/ARHGEF7/ARL2/HSPA1A/CKAP5/SLAIN2/NDEL1/ABL1/CDH5/TUBG1/TPPP3/RANBP9/MAP7D3/FES/PAK1/PIN1/FKBP4/CDK5RAP2/AKAP9/CLIP3/PRUNE1/CDKN1B/NUMA1/CAMSAP2/GIT1/GBA2/MZT1/TBCD/SNCA/ANKRD53/NIN/HSPA1B/MAPRE3/ZNF207/STMN2/STMN1
SC	GOBP_ENERGY_RESERVE_METABOLIC_PROCESS	82	0.509678	2.88323	0.00183824	0.00887008	UGP2/GYG2/PTGES3/PYGL/GBE1/STBD1/PYGB/LEP/INPP5K/SORBS1/IGF1/ACADM/PPP1CA/PID1/STK40/PPP1R1A/POMC/PPP1CB/ADGRF5/GAA/GYS1/AGL/PHLDA2/RB1CC1/IL6ST/PPP1CC/AKT1/PCDH12/INSR/EPM2AIP1/PHKB/KHK/IGF2/MTOR/GYG1/IRS2/NR1D1/GFPT2/PHKA2/PPP1R2/MYC/DYRK2/PPP1R3C
SC	GOBP_POSITIVE_REGULATION_OF_CHROMOSOME_ORGANIZATION	86	0.400412	2.28802	0.00184162	0.00887008	CCT5/TCP1/XRCC5/CCT7/CCT8/CCT6A/CCT4/HNRNPD/ATRX/GNL3/TRIM28/CCT3/RAD21/MPHOSPH8/HNRNPA1/NBN/SSBP1/DKC1/SFPQ/FEN1/CCT2/TPR/SMC2/NABP2/HNRNPA2B1/ERCC1/ACD/PNKP/RAD50/TNKS2/MAD2L1BP/NEK7/CTNNB1/NUMA1/SLF1/SLX1A/PPP1R10/HMBOX1/SIRT6/MAP3K4
SC	GOBP_NEGATIVE_REGULATION_OF_TRANSFORMING_GROWTH_FACTOR_BETA_RECEPTOR_SIGNALING_PATHWAY	79	0.409274	2.29436	0.00184162	0.00887008	HTRA1/STRAP/CAV1/PMEPA1/HSPA5/SNX6/CAV2/STUB1/FKBP1A/TGFBR3/CIDEA/FBN1/HSPA1A/GLG1/FAM89B/HTRA3/PPARG/PPM1A/BAMBI/SPRY1/PIN1/ZBTB7A/SPRY2/SMURF1/VASN/EMILIN1/TGFB1I1/SPRED2/EID2/ASPN/BMP2/SIRT1/SKI
SC	GOBP_POSITIVE_REGULATION_OF_CELL_MORPHOGENESIS_INVOLVED_IN_DIFFERENTIATION	79	0.417673	2.34144	0.00184162	0.00887008	CIB1/RAC1/P4HB/ILK/S100A10/CRK/SS18L2/FERMT2/C1QBP/CAPRIN1/DAB2/ARPC2/ARHGEF7/MDK/DBN1/TESK1/DMTN/ABL1/NRP1/MYOC/CALR/LIMS2/FLNA/PRKDC/PAFAH1B1/ACTR2/DBNL/CRKL/CUL7/OBSL1/FBXO31/MYADM/CDC42/TRIOBP
SC	GOBP_NEGATIVE_REGULATION_OF_RESPONSE_TO_CYTOKINE_STIMULUS	79	0.432022	2.42188	0.00184162	0.00887008	PXDN/CAV1/YTHDF2/GSTP1/RABGEF1/NR1H3/MUL1/NOL3/SIGIRR/CCDC3/GPS2/TREX1/MAP2K5/CARD16/SLIT3/GAS6/ADIPOQ/ECM1/CNOT7/RNF113A/PPARG/ISG15/NR1H2/PPP2CB/USP18/PIAS4/SH2B3/TREM2/KLF4/IL1RN/SLIT2/PTPRC
SC	GOBP_MUSCLE_HYPERTROPHY	86	0.429049	2.45165	0.00184162	0.00887008	ATP2B4/MTPN/YY1/TOMM70/LEP/FOXO1/LMNA/IGF1/SMAD3/PARP1/IGFBP5/MYOC/PPARG/CDK9/CYBA/TNFRSF1A/LMCD1/ROCK1/TWF1/IL6ST/PPP3CA/PARP2/MEF2A/GLRX3/ROCK2/PI16/CAMK2D/CAMTA2/RGS2/NOTCH1/ERRFI1/TNFRSF1B/BECN1/EDN1/AGT/G6PD/KLF15/AKAP13/HTR2B
SC	GOBP_OUTFLOW_TRACT_MORPHOGENESIS	79	0.438031	2.45556	0.00184162	0.00887008	RBPJ/DHRS3/ILK/PARVA/TGFBR2/TGFBR3/NIPBL/TWIST1/CITED2/ENG/CLDN5/NPY1R/NRP1/SEMA3C/SIX1/SFRP2/PLXND1/NPY5R/BMP4/CRKL/EDNRA/MEF2C/SOX17/SEC24B/HES1/SOX18/NOTCH1/CTNNB1/WNT11/ATF2/GJA5/EDN1/JUN/NRP2/CDC42/ACVR1/HEYL/BMPR2/JAG1/ELN
SC	GOBP_PRODUCTION_OF_MOLECULAR_MEDIATOR_INVOLVED_IN_INFLAMMATORY_RESPONSE	86	0.441254	2.52139	0.00184162	0.00887008	VAMP3/CD36/CUEDC2/SNX6/PRDX2/LEP/APOD/RPS19/PBXIP1/VAMP8/GRN/ALOX5AP/VAMP7/CHID1/PYCARD/MAPK14/H19/SIRPA/BAP1/KPNA6/LBP/GPSM3/PLD3/PDCD4/ABCD2/PER1/IL17D/SNX4/SLAMF8/MYD88/TREM2/VAMP2/STAT3/TICAM1/SNAP23/TLR4/APPL2/APPL1/SYK
SC	GOBP_LAMELLIPODIUM_ORGANIZATION	86	0.447577	2.55752	0.00184162	0.00887008	ITGB1/BRK1/CORO1C/WASF2/RAC1/CAPZB/ENPP2/CYFIP1/ABLIM1/ARPC2/CD44/CORO1B/ARHGEF7/VCL/TWF2/RHOD/ARHGEF6/CTTN/GOLPH3/DMTN/WASF3/KANK1/ABLIM3/ABI1/PLEKHO1/TWF1/ACTR2/ACTR3/AKIRIN1/S1PR1/ARFIP2/SNX2/PIK3R1/BIN3/NCK1/ABI3/RAC2/NUP85/MTOR/PIK3CA/ARPC5/CDC42/SLIT2/P2RY12/SNX1
SC	GOBP_POSITIVE_REGULATION_OF_DNA_REPAIR	86	0.461686	2.63814	0.00184162	0.00887008	CEBPG/MORF4L1/HMGB1/MORF4L2/MGMT/ACTB/MEAF6/PCNA/PARP3/RPS3/BABAM1/TRIM28/UBE2N/KAT5/VPS72/PARP1/EGFR/WDR48/DMAP1/KMT5B/DHX9/XRCC1/SPIDR/PRKDC/UBE2V2/MRGBP/ACTR2/ZCWPW1/TMEM161A/MAD2L2/PNKP/RBBP8/MMS19/YEATS4/SETMAR/BRCC3/ACTL6A/ING3/SLF1/RUVBL2/SIRT1/EPC2/SPIRE1/FGF10/EYA2/WRAP53/SMCHD1/RNF168
SC	GOBP_VASCULOGENESIS	79	0.480904	2.69591	0.00184162	0.00887008	CAV1/NTRK2/FZD4/TGFBR2/TGFBR3/ADM/RAMP2/RRAS/CITED2/ENG/PDGFRB/ZFP36L1/RASA1/EGFL7/ZMIZ1/WARS2/CD34/AGGF1/ITGAV/HDAC7/YAP1/RASIP1/HEG1/APLNR/TEAD2/CCM2/FBXW7/QKI/SOX17/CUL7/RIN2/RAP1A/HEY1/SOX18/NOTCH1/AMOT/KDR/CTNNB1/TMEM100/JUNB/SETD2/TIPARP
SC	GOBP_FIBROBLAST_PROLIFERATION	79	0.50136	2.81058	0.00184162	0.00887008	FTH1/GSTP1/COL3A1/MIF/DDR2/MED31/CDK4/S100A6/NDUFS4/NUPR1/IGF1/CD74/B4GALT7/SFRP1/GAS6/AQP1/PDGFRB/ABL1/EGFR/ZMIZ1/DHX9/EMD/PDGFD/FN1/BMI1/CCNB1/TRIM32/WAPL/IFI30/PDGFC/FOSL2/CTNNB1/CDKN1A/TP53INP1/JUN/SKI/AGT/MYC/PDGFRA/SIRT6/PDGFB/FGF10/PARP10/CDK6/CD300A/DAB2IP/PEX2/DACH1/LIG4
SC	GOBP_NUCLEOSIDE_TRIPHOSPHATE_METABOLIC_PROCESS	86	0.531166	3.03517	0.00184162	0.00887008	VCP/DGUOK/NME4/STOML2/DUT/PINK1/ENO1/RHOA/IMPDH2/ITPA/ALDOA/NME2/RHOQ/RAN/DCTPP1/NME3/NUDT2/NME1/TMSB4X/AK3/PID1/GIMAP7/UCK1/PARP1/ATP6V0C/MT-ATP6/CMPK1/ADK/H19/AK1/IMPDH1/AK4/ADA/MT-CO2/UCKL1/DNAJC30/UQCC3/TBPL1/DTYMK/SLC25A13/MT-ATP8/NUDT16/NME5/TREM2/SLC25A12/EFL1
SC	GOBP_RETROGRADE_TRANSPORT_ENDOSOME_TO_GOLGI	86	0.545115	3.11487	0.00184162	0.00887008	VAMP3/SURF4/VTI1B/YKT6/RAB7A/ATP9A/SNX6/VPS26B/VPS35/VPS51/BET1L/SNX3/RHOBTB3/DCTN1/VPS29/CLTC/WASH3P/RAB6A/STX10/SNX12/ARL1/RAB9A/TMEM87A/LMAN1/DENND5A/TBC1D23/STX16/ARFIP1/RAB7B/STX6/RNF126/USP7/ARFRP1/GBF1/SNX8/STX5/VPS26A/SNX5/VPS52/SNX2/PLEKHJ1/HEATR5B/RAB6B/TRIM27/TMEM87B/RIC1/SNX1/TMED9/TBC1D14
SC	GOBP_ENDOSOME_ORGANIZATION	79	0.569536	3.19277	0.00184162	0.00887008	CHMP3/CHMP2A/RAB7A/CORO1C/SQSTM1/TMEM9/IST1/VPS4A/LAMTOR1/RNASEK/VPS25/TSG101/CHMP2B/SNX3/RAB11A/RILP/WASH3P/CHMP1A/EEA1/CHMP6/VPS37A/PLEKHF1/VPS28/PI4K2A/VAMP4/STX6/RNF26/CHMP5/CHMP4A/TMCC1/SNX10/CHMP7/PDCD6IP/VTA1/CHMP4B/HOOK2/MVB12A/SNX33/SNF8/AQP11/PLEKHJ1/STAM/HGS/VPS37C/VPS18/AKTIP/DNAJC13/ARFGEF2/LAPTM4B/SCARB2/CLCN3/PI4K2B
SC	GOBP_REGULATION_OF_RESPONSE_TO_ENDOPLASMIC_RETICULUM_STRESS	79	0.601246	3.37053	0.00184162	0.00887008	TMBIM6/BCAP31/WFS1/CAV1/BOK/UBXN1/HSPA5/CREB3/CLU/DDIT3/NR1H3/RNF185/DDRGK1/XBP1/PARK7/RACK1/NFE2L2/TXNDC12/NUPR1/GRINA/HERPUD1/SERINC3/BAG6/SYVN1/TMEM259/HSPA1A/MANF/UBQLN2/UFL1/BFAR/DNAJB9/UBQLN1/BCL2L1/ATF6/NR1H2/PIK3R1/SGTA/AQP11/NCK1/USP14/ERP29/FICD/PTPN1/PPP1R15A/SIRT1/LPCAT3/USP19/OPA1/ALOX5/DAB2IP/USP25/FCGR2B
SC	GOBP_REGULATION_OF_HISTONE_METHYLATION	76	0.343794	1.90291	0.00184502	0.00887008	NELFE/SNW1/PAF1/WDR61/PIH1D1/MCRS1/IWS1/RNF20/ATRX/LMNA/KMT2E/RTF1/CTR9/PHF1/CHTOP/NNMT/WDR5/KDM1A/OGT/PHF20/HCFC1/MTF2/BRD4/PYGO2/CTNNB1/SIRT1/KANSL2/PAXBP1/RRP8/SUV39H1/PHF19/TTLL12
SC	GOBP_VACUOLAR_LOCALIZATION	81	0.343753	1.93685	0.00184502	0.00887008	VAMP3/KIF5B/FAM98A/SNAPIN/RABGEF1/BLOC1S1/SNX6/S100A13/LAMTOR1/MYH9/RAB34/VAMP8/PLEKHM2/ARL8B/VAMP7/KXD1/NDEL1/BORCS6/GAB2/DEF8/PTGDS/STXBP1/FES/SNX4/RAC2/VAMP2/SNAP23/BLOC1S2/HMOX1/FGR/LGALS9/SYK
SC	GOBP_NEGATIVE_REGULATION_OF_ION_TRANSMEMBRANE_TRANSPORTER_ACTIVITY	75	0.354922	1.96138	0.00184502	0.00887008	C4orf3/CAV1/CALM1/ADRA2A/SRI/SUMO1/YWHAE/GOPC/CALM2/GSTO1/FKBP1A/CALM3/SLC9A3R1/OXSR1/UBQLN1/CAB39/STK39/GSTM2/REM1/CRBN/PKD2/TRDN/CAMK2D/FKBP1B/ATP1A2/FMR1/NEDD4L/KCNAB1/MMP9/PLN/GEM/RRAD/CLIC2
SC	GOBP_POSITIVE_REGULATION_OF_ORGANELLE_ASSEMBLY	77	0.367458	2.04195	0.00184502	0.00887008	SH3GLB1/RHOA/RALB/STX18/SDCBP/ATMIN/MSN/PIP4K2B/BBS4/CAPG/ASAP1/PPP1R35/PDCD6IP/LCP1/G3BP1/ARHGAP35/PIP4K2A/MOAP1/CNOT2/WIPI1/PAN3/SNX4/RAB3GAP1/NUMA1/SNX7/HTT/BECN1/SNX18/CNOT1/SDC4/WDR45/SASS6/FUZ/MNS1/CNOT6L/ULK1/RAB3GAP2/PIP4K2C/FSCN1
SC	GOBP_POSITIVE_REGULATION_OF_AXONOGENESIS	77	0.36859	2.04824	0.00184502	0.00887008	NTRK2/MAP1B/GOLGA4/IST1/EIF4G2/RAB11A/CYFIP1/TWF2/CXCL12/DIXDC1/DBN1/PLXNB2/NDEL1/STK25/NRP1/ADNP/PLXND1/GDI1/PLXNA4/PAFAH1B1/FN1/DBNL/CRABP2/MAP2K1/MACF1/EFNA5/TRPV2/SHTN1/ZFYVE27/SLIT2/SRF/METRN/NIN/BMPR2/PLXNB1/PLXNA2
SC	GOBP_REGULATION_OF_NUCLEOTIDE_METABOLIC_PROCESS	81	0.369931	2.08435	0.00184502	0.00887008	VCP/PINK1/ENO1/EIF6/GPD1/PDK2/TMSB4X/NUPR1/JMJD8/IGF1/TREX1/PID1/ARL2/ZBTB20/PARP1/PGAM1/H19/PRKAG1/DDIT4/AK4/MLXIPL/MT-CO2/OGT/DNAJC30/PDK4/APP/FBP1/ZBTB7A/INSR/TREM2/STAT3/GIT1/SLC25A12/MYC/CDA/SNCA/SIRT6/LACC1/PSEN1
SC	GOBP_AXO_DENDRITIC_TRANSPORT	77	0.377947	2.10024	0.00184502	0.00887008	SOD1/KIF5B/HSPA8/SNAPIN/BLOC1S1/AP3S1/UCHL1/HSPB1/ARMCX3/FLOT2/DCTN1/HSBP1/ARL8B/AP3D1/BLOC1S4/NDEL1/PURA/DTNBP1/SFPQ/KIF3B/AP3B1/HNRNPU/TRAK2/PAFAH1B1/ARL8A/TRAK1/APP/MAP1A/DST/FBXW11/BLOC1S2/AP3M1/ACTR10/WASF1/AGTPBP1/AP3M2
SC	GOBP_REGULATION_OF_PLASMA_LIPOPROTEIN_PARTICLE_LEVELS	75	0.396941	2.19359	0.00184502	0.00887008	ANXA2/CD36/LPL/VLDLR/DGAT1/DGAT2/HNRNPK/PLTP/MYLIP/EHD1/ADIPOQ/ACSL3/GPIHBP1/CNPY2/NR1H2/LRPAP1/LIPA/ABCA5/APOE/PLA2G2A/APOC1/APOM/SCARB1/PRKACB/PRKACA/TREM2/ABCA1/CSK/HMOX1/AGT/ZDHHC8/AGTR1/KHSRP/LPCAT3/NCEH1/LDLRAP1/LCAT/PLA2G7
SC	GOBP_TRANSCRIPTION_INITIATION_FROM_RNA_POLYMERASE_II_PROMOTER	75	0.408179	2.25569	0.00184502	0.00887008	POLR2G/HMGB1/SUB1/POLR2I/CDK4/MED4/MED7/TAF9/TAF7/CTNNBIP1/TAF12/GTF2A2/TAF11/GTF2F2/TAF3/GTF2H5/CDK9/TAF10/MAZ/GTF2B/CCNH/GTF2F1/GTF2E2/THRA/ERCC1/MED12/MED30/TAF13/ERCC3/TBP/CDK7/MED14/SRF/MED16/GTF2A1/TAF6L/ATF7IP/MED24/MED26/PSMC6
SC	GOBP_RNA_PHOSPHODIESTER_BOND_HYDROLYSIS_ENDONUCLEOLYTIC	76	0.408212	2.25947	0.00184502	0.00887008	APEX1/POP7/SND1/ANG/RNASEK/CPSF3/RNASE4/RNASE1/POP5/RPP21/DROSHA/RIDA/POP4/NOB1/YBEY/ABT1/TSEN34/RNASET2/RPP40/ELAC2/FEN1/KHNYN/LACTB2/ENDOG/RPS21/RPP25/BOP1/TBL3/NUDT16/DICER1/RNASEH1/NUDT12/RRS1/RPP38/EDC3
SC	GOBP_RNA_METHYLATION	77	0.41059	2.28163	0.00184502	0.00887008	LARP7/TRMT112/HSD17B10/EMG1/DALRD3/NSUN5P2/METTL5/TRMT10C/RBM15B/MEPCE/PCIF1/ZC3H13/WTAP/FTSJ3/TRMT6/FTSJ1/TRMO/RNMT/CBLL1/TRMT1/NSUN5/METTL1/TRMT61B/THUMPD3/TRMT2A/HENMT1/TRMT1L/FBL/MRM3/TRMT13/TRMT61A/TFB2M/TYW3
SC	GOBP_SMOOTH_MUSCLE_CELL_MIGRATION	76	0.415235	2.29835	0.00184502	0.00887008	APEX1/RHOA/S100A11/GNA12/NFE2L2/CRK/PARVA/AIF1/IGF1/CORO1B/IGFBP3/AAMP/MDK/ADIPOQ/PDGFRB/IGFBP5/LRP1/NRP1/PDGFD/BCL2/GNA13/MEF2C/TRIB1/CYP1B1/ARPC5/TLR4/SLIT2/AGT/TPM1/MYC/DDR1/MIR223/PDGFB
SC	GOBP_NUCLEOSIDE_MONOPHOSPHATE_METABOLIC_PROCESS	76	0.422405	2.33803	0.00184502	0.00887008	DGUOK/DUT/ATIC/GMPR2/IMPDH2/DCTD/AK2/NUDT2/DNPH1/GUK1/TK2/NT5C/APRT/AK3/HPRT1/MPP1/AK6/UCK1/CMPK1/ADK/TYMP/AK1/IMPDH1/AK4/ADA/UCKL1/PRTFDC1/PRPS1/DTYMK/PRPS2/NT5E
SC	GOBP_NUCLEOSIDE_PHOSPHATE_CATABOLIC_PROCESS	81	0.417723	2.35363	0.00184502	0.00887008	VCP/NUDT5/DUT/HINT1/ITPA/DCTPP1/DNPH1/NEIL2/NT5C/NUDT8/NTHL1/MBD4/HPRT1/DERA/ACAT1/UNG/TYMP/ADA/NUDT7/PDE2A/NUDT18/PRTFDC1/SMUG1/NUDT17/PDE8B/NT5E/ACOT7/NUDT3/NUDT16/UPP1/CNP/PDE4A/NUDT12/PDE8A/ENTPD6
SC	GOBP_REGULATION_OF_TELOMERE_MAINTENANCE	77	0.439385	2.44164	0.00184502	0.00887008	CCT5/TCP1/XRCC5/CCT7/CCT8/CCT6A/CCT4/HNRNPD/TERF2IP/HNRNPC/ATRX/TEN1/GNL3/CCT3/PARP1/HNRNPA1/NBN/PINX1/DKC1/USP7/SMG5/XRCC1/HNRNPU/CCT2/NABP2/HNRNPA2B1/ERCC1/UPF1/ACD/PNKP/RAD50/TNKS2/NEK7/CTNNB1/EXOSC10/SLX1A/PPP1R10/MYC/HMBOX1/SIRT6/MAP3K4
SC	GOBP_NEGATIVE_REGULATION_OF_PROTEIN_POLYMERIZATION	75	0.455412	2.51672	0.00184502	0.00887008	VDAC2/RDX/MTPN/PFN1/MKKS/FLII/CAPZB/SPTBN1/GSN/MAPRE1/TMSB4X/ADD1/ARHGEF7/TWF2/PFN2/EPS8/CAPZA1/SPTAN1/DMTN/BBS4/TMSB10/CAPG/LMOD1/CDH5/KANK1/TMOD1/KANK4/TWF1/KANK3/FKBP4/SVIL/CLIP3/SSH3/MYADM/TRIOBP/TBCD/SLIT2/SNCA/STMN2/STMN1/TMSB15A
SC	GOBP_PROTEIN_MONOUBIQUITINATION	75	0.45563	2.51792	0.00184502	0.00887008	UBE2R2/UBB/UBE2D3/PEF1/SKP1/RBX1/PAF1/RNF20/TSG101/WAC/RING1/CTR9/BIRC2/RNF40/HUWE1/KLHL12/PDCD6/WDR48/RNF126/PCGF3/TOPORS/CUL1/CUL4B/UBE2E1/FANCL/BMI1/PCGF5/PCGF1/CUL3/UBE2B/TRIM21/RYBP/KLHL22/ZC4H2
SC	GOBP_ENDODERM_DEVELOPMENT	77	0.455098	2.52896	0.00184502	0.00887008	ITGB5/LAMC1/MESP1/PELO/PAF1/COL5A2/COL4A2/COL6A1/ITGA7/LAMB3/COL12A1/RTF1/MMP2/HSBP1/CTR9/SMAD3/ZFP36L1/LAMB1/EXT1/COL5A1/ITGAV/FN1/KIF16B/ITGA5/MED12/BMP4/DUSP1/BPTF/SOX17/ITGB2/DUSP4/NOTCH1/LDB1/CTNNB1/SETD2/MMP15/MMP9/HDAC1/GATA6/MMP14/DUSP2/COL8A1
SC	GOBP_NEGATIVE_REGULATION_OF_MYELOID_CELL_DIFFERENTIATION	77	0.475978	2.64499	0.00184502	0.00887008	CIB1/PAF1/WDR61/HOXA7/MAFB/FSTL3/TCTA/CTR9/FBN1/SFRP1/ADIPOQ/ZFP36L1/C1QC/TOB2/HOXA5/STAT5B/GPR137B/NFKBIA/ZBTB16/FBXW7/PIK3R1/TMEM178A/TRIB1/PRMT1/HSPA9/CCL3/LDB1/CTNNB1/TNFAIP6/PIAS3/GABPA/KLF13/TLR4/HOXB8/MYC/ZFP36/RARA/HOXA9/CDK6/CUL4A/LILRB4/MEIS1/LRRC17
SC	GOBP_REACTIVE_NITROGEN_SPECIES_METABOLIC_PROCESS	76	0.493922	2.73388	0.00184502	0.00887008	CD36/HSP90AB1/ATP2B4/CAV1/HSP90AA1/DDAH2/RAC1/ASS1/CLU/SPR/TSPO/NQO1/CYB5R3/CYB5B/GCHFR/AIF1/THAP4/SMAD3/POR/GLA/SIRPA/CD34/KLF2/PKD2/AKT1/ROCK2/INSR/CYP1B1/DDAH1/CD47/KLF4/TICAM1/EDN1/RGN/TLR4/ARG2/HBB/AGT/ACP5/KHSRP/JAK2
SC	GOBP_REGULATION_OF_ATP_METABOLIC_PROCESS	81	0.490876	2.7658	0.00184502	0.00887008	VCP/COX7A2L/PINK1/ENO1/EIF6/GPD1/RHOA/FIS1/COX7A2/DNAJC15/TSPO/UQCC2/TMSB4X/NUPR1/PPIF/JMJD8/IGF1/TREX1/PID1/COX7A1/ARL2/ZBTB20/PARP1/PGAM1/H19/PRKAG1/DDIT4/AK4/MLXIPL/MT-CO2/OGT/DNAJC30/SHMT2/APP/FBP1/ZBTB7A/INSR/TREM2/DNM1L/STAT3/GIT1/SLC25A12/MYC/SNCA/SIRT6
SC	GOBP_REGULATION_OF_PHOSPHATASE_ACTIVITY	81	0.49126	2.76797	0.00184502	0.00887008	HSP90B1/HSP90AB1/CSNK2B/CALM1/BOD1/PPP1R11/GNA12/CRY2/CALM2/FKBP1A/TIPRL/PPP1R1B/CALM3/URI1/LGALS3/SMAD3/PDGFRB/GNAI2/BAG4/STYXL1/CDK5RAP3/PPP1R12A/PPP1R35/PPP6R3/ROCK1/SLC39A10/PLEK/PPP1R36/PPP6R2/MEF2C/ROCK2/FKBP1B/CHP1/NUAK1/MGAT5/MTOR/HTT/BMP2/PPP1R15A/RGN/PTPRC/PPP1R2/BOD1L1/PTPA/JAK2/RIPK3/CD300A/ITGA1
SC	GOBP_POSITIVE_REGULATION_OF_PROTEIN_BINDING	81	0.51373	2.89457	0.00184502	0.00887008	ANXA2/HSP90AB1/CAV1/POLDIP2/FLOT1/RAN/RALB/MAPRE1/B2M/FKBP1A/DERL1/PPP2CA/SPON1/ADD1/RPL11/CLDN5/ABL1/CDK5/LRP1/NRP1/HIPK2/CTHRC1/BAMBI/RFNG/PLXND1/HSF1/MFNG/PPP2CB/TCF7L2/APOE/APP/PIN1/BMP4/RIPK2/PLCL2/TRIM21/BMP2/TICAM1/MMP9/AKTIP/MEN1/MAPRE3/PSEN1/AMFR/SPAG8
SC	GOBP_MONOSACCHARIDE_BIOSYNTHETIC_PROCESS	81	0.540089	3.04309	0.00184502	0.00887008	PGD/GPD1/PGK1/PGM1/TPI1/ATF4/RANBP2/PFKFB1/SLC25A1/RBP4/LEP/DGAT2/FOXO1/PDK2/ACADM/PC/ARPP19/SDHAF3/FAM3C/NNMT/ADIPOQ/PGP/USP7/WDR5/SLC25A10/OGT/PPP4R3B/CLK2/KAT2A/AKR1A1/SESN2/PCK1/SLC25A13/PCK2/FBP1/PGAM2/GPT/GPI/RGN/SLC25A12/SIRT1/CRY1/SLC37A4/G6PD/ZNF692/ATF3
SC	GOBP_INTRINSIC_APOPTOTIC_SIGNALING_PATHWAY_BY_P53_CLASS_MEDIATOR	75	0.550911	3.04446	0.00184502	0.00887008	HINT1/UBB/PTTG1IP/BOK/SNW1/TRIAP1/MIF/DDX5/TMEM109/PDK2/TAF9/PHLDA3/HNRNPK/NUPR1/SHISA5/CD44/RPS7/CD74/RRN3/ING2/BAG6/PERP/PYCARD/HIPK2/DDIT4/KDM1A/TOPORS/RPL26/IFI16/TAF9B/EIF5A/WWOX/BCL2/HIPK1/CDKN1A/MSX1/SIRT1/BCL3/MYBBP1A/MYC/DYRK2/JMY/RRP8/RPS27L/CDIP1
SC	GOBP_FATTY_ACID_BETA_OXIDATION	75	0.55169	3.04877	0.00184502	0.00887008	ACADVL/HADHB/HADHA/HSD17B10/ECH1/ACAA2/ACADS/LEP/ACAA1/DECR1/ECHS1/ETFB/CRAT/ACADM/ACOT8/ACAT2/MCAT/TWIST1/ADIPOQ/ACAD11/ETFA/ACAT1/BDH2/SCP2/ECI2/HADH/ECI1/ACOX2/LONP2/SESN2/GCDH/TYSND1/AUH/AKT1/ECHDC2/ABCD2/ACOX3/HSD17B4/SLC25A17/ACOX1/IRS2/DECR2/ACACB
SC	GOBP_REGULATION_OF_PROTEIN_TARGETING	76	0.556129	3.0782	0.00184502	0.00887008	UBE2L3/CIB1/PARL/PDCD5/ITGB1BP1/HAX1/MFF/SH3GLB1/PINK1/UBE2D3/BNIP3L/FIS1/HTRA2/FYN/MYO1C/SAE1/INPP5K/UBE2J2/UBL5/HRAS/TOMM7/LMAN1/HUWE1/STOM/BAG3/DMTN/CDK5/BAG4/BAP1/ABLIM3/GDI1/FZD5/FBXW7/LEPROT/RHOU/SREBF2/TCAF1/ITGB2/PRNP/USP36/CHP1/RAC2/ATG13/SREBF1
SC	GOBP_DNA_TEMPLATED_TRANSCRIPTION_ELONGATION	76	0.572865	3.17084	0.00184502	0.00887008	NELFE/LARP7/EAPP/HTATSF1/PAF1/WDR61/POLR2I/HMGN1/ADRM1/RTF1/POLR1E/CTR9/DDX39B/ZMYND11/GTF2F2/SUPT4H1/GTF2H5/CDK9/TCEA2/ENY2/HEXIM1/SETD5/SUPT5H/CCNK/HNRNPU/GTF2F1/TCERG1/NELFB/TSFM/ELL2/PCID2/THOC1/ERCC3/EAF2/BRD4/WDR43/LDB1/CTNNB1/SCAF8/EAF1/ALYREF/ELOF1/SETD2/CCNT1/CCNT2/CCAR2/CBX7/ELP2/RNF168
SC	GOBP_ALTERNATIVE_MRNA_SPLICING_VIA_SPLICEOSOME	77	0.584073	3.24567	0.00184502	0.00887008	STRAP/SAP18/RBM17/PQBP1/RBFOX2/THRAP3/DDX5/CELF2/HNRNPM/SLU7/PUF60/SRSF2/RBM15B/DDX17/SRSF9/CELF1/YTHDC1/WTAP/KHDRBS1/FXR1/RBM25/RBM4/HNRNPA1/REST/PTBP1/MBNL1/SRSF1/SRSF6/RBM10/SFPQ/MAGOH/KDM1A/DHX9/RBM8A/KHDRBS3/HNRNPU/TRA2B/NOVA1/FAM172A/MBNL2/ZBTB7A/RBM5/RBMX/TIA1/RNPS1/HNRNPL/FMR1/SFSWAP/MBNL3
SC	GOBP_UBIQUITIN_DEPENDENT_ERAD_PATHWAY	81	0.581207	3.27477	0.00184502	0.00887008	VCP/HSP90B1/SEC61B/BCAP31/WFS1/CAV1/OS9/DNAJB12/HSPA5/RNF185/RHBDD2/AUP1/UBE2J1/NFE2L2/RNF5/STUB1/UBXN4/UBE2J2/DERL1/ERLEC1/DERL2/HERPUD1/BAG6/SYVN1/CANX/UBQLN2/EDEM2/FBXO17/DNAJB9/UBQLN1/FAF2/TMUB1/CALR/UBE4A/CCDC47/TMEM129/ERLIN1/SEL1L/DNAJB2/FAM8A1/SGTA/USP14/MAN1A1/UBE2G2/EDEM3/STT3B
SC	GOBP_REGULATION_OF_TRANSLATIONAL_INITIATION	81	0.692607	3.90244	0.00184502	0.00887008	DDX1/EIF3K/POLR2G/CSDE1/YTHDF2/NCBP2/EIF4EBP3/EIF5B/PAIP2/EIF4H/EIF1/CDC123/ATF4/EIF1B/EIF3H/HSPB1/EIF2S1/EIF4B/EIF4G2/YTHDF1/NPM1/DHX29/EIF2AK1/EIF5/EIF4EBP2/EIF3B/RPL13A/PPP1CA/BZW2/EIF4EBP1/EIF4G1/KHDRBS1/EIF4A2/RBM4/PAIP1/EIF2B5/MIF4GD/HABP4/LARP1/DNAJC3/C8orf88/EIF2AK4/GLE1/TPR/BZW1/BANK1/TMED2/EIF2B2/NCK1/EIF4G3/IMPACT/ALKBH1/CTIF/MTOR/PPP1R15A/FMR1
SC	GOBP_POSITIVE_REGULATION_OF_PHOSPHATIDYLINOSITOL_3_KINASE_SIGNALING	78	0.392499	2.19285	0.00185185	0.00887008	HAX1/NTRK2/LEP/MYDGF/CAT/IGF1/RGL2/FGFR1/DCN/PDGFRB/GPER1/MYOC/MAZ/PRR5/HCST/PDGFD/FN1/UBE3A/HCLS1/ANGPT1/INSR/PTPN6/PDGFC/TEK/KDR/TREM2/SELP/BECN1/SIRT1/FGR/AGT/PDGFRA/PDGFB/ROR1/FGF2/PLXNB1/JAK2
SC	GOBP_TELOMERE_MAINTENANCE_VIA_TELOMERE_LENGTHENING	78	0.429824	2.40137	0.00185185	0.00887008	CCT5/TCP1/XRCC5/HSP90AB1/HSP90AA1/RPA1/CCT7/CCT8/CCT6A/CCT4/PTGES3/TERF2IP/HNRNPC/NHP2/NOP10/TEN1/CCT3/PARP1/HNRNPA1/TNKS1BP1/PINX1/DKC1/SMG5/HNRNPU/CCT2/HNRNPA2B1/GAR1/ACD/PNKP/RAD50/RFC1/TNKS2/NEK7/CTNNB1/EXOSC10/TELO2/SLX1A/HMBOX1/WRAP53/MAP3K4/ZBTB48
SC	GOBP_CELLULAR_CARBOHYDRATE_BIOSYNTHETIC_PROCESS	78	0.439512	2.4555	0.00185185	0.00887008	UGP2/GYG2/PTGES3/GBE1/LEP/B4GAT1/INPP5K/SORBS1/IGF1/ACADM/PPP1CA/PPP1CB/PGP/EXT1/GOT1/GYS1/AGL/PCK1/PCK2/FBP1/AKT1/ISYNA1/INSR/B4GALT1/B3GNT2/EPM2AIP1/IGF2/GYG1/IRS2/NR1D1/B4GALT5/HS2ST1/DYRK2/B3GNT9/NDST2/PPP1R3C
SC	GOBP_CELLULAR_RESPONSE_TO_VIRUS	78	0.470057	2.62615	0.00185185	0.00887008	PHB2/PHB/HSP90AA1/PUM1/ARF1/TOMM70/ANKRD17/NFKB1/C1QBP/RNF135/BIRC2/SMAD3/LGALS8/LSM14A/MAPK14/H19/EXT1/GBF1/EIF5A/GPATCH3/IRF7/PUM2/ZCCHC3/IFI6/PENK/RRP1B/TSPAN6/CCL19/ATF2/IRF3/FMR1/IFIH1/BIRC3/CXCL10/RIOK3/LGALS9/NLRX1/ADAR/DDX58/DDX60/CHUK/DDX3X/DHX58/IL6/ZC3H12A
SC	GOBP_CELLULAR_RESPONSE_TO_ACID_CHEMICAL	78	0.600668	3.35586	0.00185185	0.00887008	LAMTOR4/RRAGA/NTRK2/LAMTOR2/HNRNPD/COL5A2/ASS1/FYN/COL3A1/CAPN2/LAMTOR1/XBP1/COL6A1/LAMTOR5/COL1A2/COL4A1/HNRNPAB/MMP2/RRAGD/SESN1/EGFR/CYBA/BCL2L1/SIX1/PDGFD/HSF1/SESN2/RRAGB/CEBPB/KLF2/PKD2/ZEB1/COL1A1/IPO5/SESN3/PLEC/SH3BP4/PDGFC/RRAGC/KLHL22/MTOR/NSMF/PIK3CA/CYBB/LAMTOR3/MYC/COL16A1/SOCS1/PDGFRA/BCL2L2
SC	GOBP_REGULATION_OF_PROTEIN_DEPOLYMERIZATION	83	0.337042	1.91709	0.00187617	0.00887008	CIB1/RDX/MTPN/MAP1B/FLII/CAPZB/DSTN/SPTBN1/GSN/ASPH/CFL2/LIMA1/WDR1/ADD1/TWF2/EPS8/CAPZA1/SPTAN1/DMTN/MID1/CAPG/LMOD1/TMOD1/SWAP70/TWF1/PLEK/MAP1A/SVIL/CAMSAP2/PIK3CA/TRIOBP/ARHGEF2/CKAP2/NES/STMN2/KATNB1/ATXN7
SC	GOBP_MYOBLAST_DIFFERENTIATION	83	0.345143	1.96317	0.00187617	0.00887008	RBPJ/ITGB1/LGALS1/SRA1/DDIT3/DDX5/BTG1/FLOT2/EPAS1/DDX17/IGF1/IGFBP3/ZFP36L1/MAPK14/REST/MBNL1/ID3/TCF7L2/AKIRIN1/BMP4/IFRD1/MAML1/MEF2C/XKR8/PLEC/NOTCH1/RB1/LRRC8A/CXCL10/MAP3K5/MBNL3/SRF/JAG1/BOC
SC	GOBP_CELL_ADHESION_MEDIATED_BY_INTEGRIN	83	0.363916	2.06995	0.00187617	0.00887008	CIB1/ITGB5/ITGB1BP1/ITGB1/CRK/ITGA7/ITGAE/FBN1/PLPP3/EFNA1/WNK1/PTPN11/EXT1/ADA/ITGAV/SFRP2/PIEZO1/ITGA6/SWAP70/JAM3/ITGA5/FERMT3/CRKL/ITGB2/PTPN6/PDE3B/CYP1B1/PODXL/SNAI2/P2RY12/LPXN/COL16A1/SYK/ICAM1/ADAM9/CCL21/ITGBL1/ITGAM/ITGA1/DPP4
SC	GOBP_NEGATIVE_REGULATION_OF_CELL_CYCLE_G1_S_PHASE_TRANSITION	83	0.388091	2.20746	0.00187617	0.00887008	FHL1/TRIAP1/CDKN2B/CDK2AP2/PRMT2/RPA2/CCND1/FBXO7/CTDSP1/CTDSP2/TREX1/METTL13/WAC/CTDSPL/PTEN/JADE1/RPL26/GPNMB/PRKDC/BCL2/CDKN2D/PLK2/PKD2/CDKN1B/FAM107A/RB1/NACC2/APBB1/KLF4/FBXO31/CDKN1A/RBL2/ACVR1/BRD7/CCL2/MEN1/RPS27L/KANK2/ZNF655/SLFN11/DCUN1D3
SC	GOBP_IRON_ION_HOMEOSTASIS	83	0.396621	2.25598	0.00187617	0.00887008	ACO1/SOD1/NDFIP1/ISCU/FTH1/STEAP1/ATP6V1G1/SRI/FBXL5/NCOA4/SLC25A28/FTL/B2M/CCDC115/EIF2AK1/EPAS1/NUBP1/BOLA2B/PICALM/BOLA2/BDH2/HYAL2/SLC40A1/ATP6AP1/SCARA5/ATP6V0D1/GLRX3/ABCB6/BMP6/HMOX2/TMEM199/CYB561/HMOX1/MYC/TFRC/SLC25A37/CYBRD1
SC	GOBP_REGULATION_OF_VIRAL_GENOME_REPLICATION	83	0.41507	2.36092	0.00187617	0.00887008	PPIH/SRPK2/BANF1/TNIP1/STAU1/TOP2B/PPIA/INPP5K/IFITM3/PABPC1/BST2/TRIM28/IFITM2/MPHOSPH8/IFITM1/CNOT7/LARP1/ISG15/APOBEC3C/SRPK1/IFI16/ILF3/PLSCR1/BCL2/PPIE/N4BP1/ZC3HAV1/IFIT1/RAD23A/VAPB/IFIT5/NOTCH1/PPID/PKN2/IFIH1/TMEM39A/ZNFX1/SLPI/PARP10
SC	GOBP_POSITIVE_REGULATION_OF_LIPID_BIOSYNTHETIC_PROCESS	83	0.421124	2.39535	0.00187617	0.00887008	CREBL2/NR1H3/CAPN2/ANXA1/DGAT2/CCDC3/SORBS1/ELOVL5/DAB2/CD74/ADM/CTDNEP1/ZBTB20/POR/ACSL3/ABHD6/ADGRF5/MLXIPL/NR1H2/FGF1/AVP/APOE/SCAP/AKT1/ABCD2/CHP1/SCARB1/BMP6/MTOR/SREBF1/LPGAT1/SIRT3/NR1D1/RGN
SC	GOBP_AMYLOID_PRECURSOR_PROTEIN_METABOLIC_PROCESS	83	0.43536	2.47632	0.00187617	0.00887008	RTN4/RTN3/TMED10/NTRK2/ITM2B/CLU/FLOT2/ITM2A/FKBP1A/BIN1/AATF/IGF1/SPON1/PICALM/NCSTN/EFNA1/APH1B/DHCR24/PSENEN/PSEN2/ITM2C/RELA/IFNGR1/RANBP9/SP1/ROCK1/BACE2/NECAB3/APOE/PIN1/ROCK2/PRNP/RTN1/APH1A/BACE1
SC	GOBP_MEMBRANE_DOCKING	83	0.455527	2.59104	0.00187617	0.00887008	AHCYL1/ESYT1/VAMP3/VTI1B/RAB10/YKT6/RAB7A/CALM1/CAV2/RALB/SNX3/STX12/STX10/VAMP8/SCFD2/USO1/MSN/MOSPD3/STX16/STX6/PSEN2/RAB13/RAB8B/ROCK1/EZR/PEX16/STX5/VMP1/STXBP1/STX8/PLEK/ESYT2/VAPB/CHP1/STX7/STX4/UNC13B/CEP290/VCAM1/RAB8A/VPS18/PACS2/CTBP2
SC	GOBP_NEGATIVE_REGULATION_OF_CYSTEINE_TYPE_ENDOPEPTIDASE_ACTIVITY	83	0.472841	2.68952	0.00187617	0.00887008	GPX1/PRDX5/CRYAB/TRIAP1/IGBP1/NOL3/PIH1D1/CAST/PARK7/LAMTOR5/CD44/PRDX3/MAP2K5/RNF34/USP47/BIRC2/CARD16/GAS6/AQP1/POR/ARL6IP1/SIAH2/DHCR24/DNAJB6/IFI16/THBS1/SFRP2/AVP/CDKN2D/CST7/PCID2/AKT1/BCL2L12/IFI6/GPI/KLF4/CAAP1/BIRC3/FNIP1/SH3RF1/MMP9/SNCA
SC	GOBP_CELLULAR_RESPONSE_TO_HYDROGEN_PEROXIDE	83	0.498985	2.83822	0.00187617	0.00887008	APEX1/PINK1/OSER1/ANXA1/PARK7/NQO1/PDCD10/PCNA/RACK1/TXN/NFE2L2/CAT/RPS3/PPIF/SIGMAR1/AQP1/ABL1/BNIP3/MAP1LC3A/STK25/SIRPA/ZNF580/SETX/FOXO3/RELA/PDGFD/HSF1/TRAP1/ENDOG/AXL/KLF2/IL18BP/RHOB/NET1/RIPK1/IMPACT/CYP1B1/STAT6/BECN1/EDN1/SIRT1/MAP3K5/PDE8A/AIFM1/TNFAIP3
SC	GOBP_FOCAL_ADHESION_ASSEMBLY	83	0.514953	2.92905	0.00187617	0.00887008	LIMCH1/ITGB1BP1/POLDIP2/PTPRA/CORO1C/RHOA/RAC1/TRIP6/APOD/S100A10/SORBS1/FERMT2/ACTN1/ACTG1/ARHGEF7/VCL/RHOD/CTTN/SMAD3/MAP4K4/SFRP1/PTEN/SLK/THY1/DMTN/DLC1/ABL1/NRP1/MYOC/THBS1/ROCK1/BCL2/DUSP22/ROCK2/GPM6B/MACF1/ACVRL1/EFNA5/FAM107A/TEK/KDR/LDB1/DAPK3/PHLDB2/SDC4/BCR/COL16A1/CORO2B
SC	GOBP_ENDOPLASMIC_RETICULUM_ORGANIZATION	83	0.579289	3.29499	0.00187617	0.00887008	ESYT1/RTN4/REEP5/EMC6/RTN3/RAB10/JAGN1/WDR83OS/RAB18/LMAN2/SEC61A1/VAPA/CAV2/CAMLG/LMAN2L/MMGT1/TRAM1/EMC9/EMC7/STX18/UBL4A/BAG6/MOSPD3/GET4/LMAN1/SEC31A/EMC8/EMC3/ARL6IP1/ZBED3/TMCC1/CCDC47/REEP3/SEC16A/REEP6/BNIP1/EMC4/TMED2/TRDN/SGTA/ESYT2/REEP4/VAPB/RAB3GAP1/ATL3/DNM1L/SHTN1/TRAM2/LNPK/EMC2/ZFYVE27
SC	GOBP_CELLULAR_SENESCENCE	84	0.31654	1.80069	0.0018797	0.00887008	YBX1/CDKN2B/NEK6/B2M/HRAS/KAT5/ING2/EEF1E1/BCL6/TWIST1/MAPK14/ABL1/YPEL3/CALR/MAP3K3/RSL1D1/PLK2/ID2/MAP2K1/ULK3/MAP2K4/NUAK1/ABI3/CDKN1B/MAP2K3/CDKN1A/SIRT1/MAP3K5/ARG2/SRF
SC	GOBP_REGULATION_OF_RHO_PROTEIN_SIGNAL_TRANSDUCTION	84	0.347322	1.97579	0.0018797	0.00887008	ITGB1/FLOT1/RAC1/COL3A1/PDCD10/ARHGDIB/KCTD10/EPS8/BCL6/ARHGDIA/PDGFRB/DLC1/ABL1/NRP1/MYOC/KANK1/LPAR1/TNFAIP1/LPAR6/ARHGAP35/RASIP1/HEG1/APOE/RASGRF2/NET1/CUL3/STARD13/RALBP1/ABCA1/MYO9B/CDC42SE1/BCR/ARHGEF2/AKAP13/STMN1/KANK2/ARRB1/GPR18
SC	GOBP_NEGATIVE_REGULATION_OF_CHROMOSOME_ORGANIZATION	84	0.363058	2.06531	0.0018797	0.00887008	PSMG2/TERF2IP/HNRNPC/ATRX/NAA10/LCMT1/TEN1/RAD21/MNAT1/PARP1/HNRNPA1/IK/NBN/BAZ1B/PINX1/XRCC1/HNRNPU/TPR/BUB3/MAD2L2/CCNB1/ERCC1/PCID2/ACD/CDK5RAP2/WAPL/DUSP1/RAD50/SETMAR/TNKS2/ZW10/MAD2L1BP/KLHL22/EXOSC10/PTTG1/ANAPC15/SLX1A/MAD1L1/SMARCA5/ZNF207/DYNC1LI1
SC	GOBP_CHROMOSOME_LOCALIZATION	84	0.372657	2.11992	0.0018797	0.00887008	CHMP3/CHMP2A/BOD1/DCTN2/VPS4A/NUDC/CHMP2B/LMNA/RAB11A/KIF22/KPNB1/CHMP1A/CHMP6/EML3/NDEL1/PINX1/CHMP5/CHMP4A/CHMP7/HNRNPU/PDCD6IP/CHMP4B/CDC23/MLH1/EML4/ACTR2/ACTR3/SUN1/CCNB1/CUL3/UBE2B/ZW10/NUMA1/BECN1/MAD1L1/RRS1/PIBF1/RMDN1/ANKRD53/GEM/KATNB1
SC	GOBP_PYRIMIDINE_CONTAINING_COMPOUND_METABOLIC_PROCESS	84	0.379321	2.15783	0.0018797	0.00887008	NME4/DUT/NME2/DCTD/DCTPP1/NME3/NEIL2/TK2/NT5C/NME1/AK3/NTHL1/MBD4/DPYSL2/UCK1/THTPA/NT5C3A/CDADC1/CMPK1/APOBEC3C/UNG/TYMP/UCKL1/DPYSL3/SMUG1/PRPS1/ERH/TBPL1/DTYMK/NME5/UPP1/MTOR/SHMT1
SC	GOBP_REGULATION_OF_MICROTUBULE_POLYMERIZATION_OR_DEPOLYMERIZATION	85	0.383031	2.17771	0.0018797	0.00887008	CIB1/MAP1B/RAC1/RANGRF/DRG1/MAPRE1/RPS3/DCTN1/ARL3/ARHGEF7/ARL2/HSPA1A/CKAP5/SLAIN2/ABL1/MID1/CDH5/FES/PAK1/FKBP4/CDK5RAP2/AKAP9/MAP1A/CLIP3/PRUNE1/CDKN1B/NUMA1/MAPRE2/CAMSAP2/GIT1/GAS2L1/GBA2/TBCD/SNCA/ARHGEF2/CKAP2/ANKRD53/NIN/HSPA1B/MAPRE3/STMN2/STMN1/KATNB1/ATXN7/SKA2/MAP1S
SC	GOBP_ORGANELLE_TRANSPORT_ALONG_MICROTUBULE	85	0.392064	2.22906	0.0018797	0.00887008	KIF5B/UBB/UXT/SNAPIN/MAP1B/BLOC1S1/AP3S1/UCHL1/COPG1/ARMCX3/RAB1A/RAB6A/HSBP1/AP3D1/BLOC1S4/NDEL1/DTNBP1/RHOT2/COPG2/KIFAP3/KIF3B/AP3B1/TRAK2/PAFAH1B1/LAMP1/TRAK1/SUN1/FYCO1/BICD2/LRPPRC/FBXW11/ARHGAP21/RHOT1/HTT/PEX14/BLOC1S2/CDC42/AP3M1/ACTR10/WASF1/AGTPBP1/AP3M2/KIF13A/OPA1/MAP1S
SC	GOBP_NEGATIVE_REGULATION_OF_AUTOPHAGY	84	0.415457	2.36339	0.0018797	0.00887008	RRAGA/POLDIP2/PINK1/DAP/CTSA/TSPO/LEP/EIF4G2/RNF5/NUPR1/FEZ2/NRBP2/EIF4G1/PHF23/SNRNP70/CHMP4A/ATG7/CHMP4B/BCL2/RASIP1/AKT1/MCL1/EIF4G3/USP36/USP30/CPTP/QSOX1/KLHL22/TREM2/MTOR/STAT3/PIK3CA/BECN1/TAB2/HMOX1/TMEM39A/MTM1/TBC1D14/SNCA/IL10RA/HTR2B/KIF25/SEC22B/HERC1
SC	GOBP_CYTOSKELETON_DEPENDENT_CYTOKINESIS	85	0.425191	2.41741	0.0018797	0.00887008	CHMP3/POLDIP2/CHMP2A/JTB/RHOA/KLHDC8B/SNX9/ARF1/IST1/VPS4A/MYH10/SPTBN1/RHOC/DCTN3/CHMP2B/ARL3/CHMP1A/UNC119/CHMP6/SON/LZTS2/RASA1/BBS4/CHMP5/STAMBP/CHMP4A/CHMP7/PDCD6IP/ROCK1/CHMP4B/ACTR2/ACTR3/RHOB/SNX33/MAP9/BIN3/ROCK2/CUL7/PLEC
SC	GOBP_EXTRINSIC_APOPTOTIC_SIGNALING_PATHWAY_VIA_DEATH_DOMAIN_RECEPTORS	84	0.457317	2.60152	0.0018797	0.00887008	GPX1/BEX3/GABARAP/PEA15/TIMP3/PARK7/BAD/DAXX/ZDHHC3/DEDD/TRADD/RNF34/SORT1/LGALS3/SFRP1/PTEN/TMBIM1/BAG3/FADD/TNFRSF1A/BCL2L1/THBS1/SFRP2/HMGB2/BCL2/MOAP1/PIK3R1/FEM1B/STX4/BLOC1S2/HMOX1/BID/ARHGEF2/ITPRIP/TNFAIP3/FAIM/DEDD2/ICAM1/TNFRSF10C/ATF3/DAB2IP/DIABLO/CRADD/MADD/FAF1/DDX3X
SC	GOBP_RNA_EXPORT_FROM_NUCLEUS	84	0.487397	2.77263	0.0018797	0.00887008	NCBP2/THOC7/RAN/SSB/IWS1/SRSF3/NPM1/RBM15B/SARNP/ALKBH5/DDX19B/NXT1/YTHDC1/PABPN1/POLDIP3/KHDRBS1/UPF2/DDX39B/HNRNPA1/CHTOP/RAE1/AGFG1/NUP214/DDX39A/ZC3H11A/SMG7/ENY2/SMG5/DHX9/THOC2/GLE1/TPR/HNRNPA2B1/PCID2/UPF1/THOC1/NUP153/NUP85/NXF1/ALYREF/MCM3AP/THOC6/AKAP8L/SETD2
SC	GOBP_LIPID_STORAGE	84	0.526341	2.99417	0.0018797	0.00887008	CD36/CAV1/LPL/NR1H3/MEST/CES1/ALKBH7/LEP/DGAT1/CRY2/DGAT2/AUP1/PNPLA2/NFKB1/PLIN2/BSCL2/C3/CIDEA/HILPDA/OSBPL8/EHD1/HEXB/PLIN3/PPARG/GBA/ITGAV/NRIP1/NR1H2/STAT5B/NFKBIA/GM2A/ABHD5/APOE/CDS2/FBXW7/SREBF2/ACVR1C/OSBPL11/LDAH/SCARB1/ZFYVE1/TREM2/ABCA1/SREBF1/SIRT1/CRY1/ACACB
SC	GOBP_POSITIVE_REGULATION_OF_PROTEIN_LOCALIZATION_TO_NUCLEUS	84	0.567602	3.22889	0.0018797	0.00887008	CCT5/TCP1/HSP90AB1/LARP7/CCT7/CCT8/CCT6A/CCT4/RAN/FYN/MCRS1/LEP/PARK7/LAMTOR5/FERMT2/MEPCE/TRIM28/CCT3/ORMDL3/SMAD3/PARP1/HDAC3/TESK1/BAG3/MAPK14/PINX1/RBM22/DKC1/DMAP1/CDK5RAP3/HYAL2/WWTR1/FLNA/TARDBP/CCT2/TPR/SESN2/YAP1/HCLS1/PIK3R1/JUP/AKT1/IPO5
SC	GOBP_AUTOPHAGY_OF_MITOCHONDRION	84	0.663175	3.77257	0.0018797	0.00887008	PARL/PHB2/HAX1/PINK1/OPTN/GABARAP/BNIP3L/FUNDC2/MFN2/SQSTM1/FIS1/SLC25A5/HTRA2/MUL1/TSPO/GABARAPL2/PARK7/ATG3/VDAC1/FBXO7/MAP1LC3B/CTSK/GABARAPL1/ATG5/TOMM7/WDR45B/FUNDC1/SLC25A4/CTTN/HUWE1/CDC37/BNIP3/MAP1LC3A/WIPI2/GBA/ATG9A/ATG12/ATG7/ATG4B/RB1CC1/FZD5/ARFIP2/FBXW7/SREBF2/SLC25A46/WIPI1/C5orf51/USP36/USP30/DNM1L/HTT/ATG13/SREBF1/BECN1/VPS13D/CSNK2A2/ATG4D/CAMKK2/WDR45
SC	GOBP_PIGMENT_METABOLIC_PROCESS	87	0.322651	1.83823	0.00188679	0.00887008	PGRMC1/UROD/DDT/TMEM14C/TMEM14A/TSPO/BLVRB/BLVRA/APRT/NFE2L1/HPRT1/PPOX/ALAS1/SLC25A38/BDH2/ALAD/TMEM14B/GIPC1/ADA/SLC25A39/CTNS/SHMT2/PRTFDC1/BCL2/UROS/PRPS1/ABCB6/HMBS/ZEB2/HMOX2/SHMT1/COX15/HMOX1
SC	GOBP_POSITIVE_REGULATION_OF_LIPID_TRANSPORT	87	0.333325	1.89904	0.00188679	0.00887008	ANXA2/CAV1/DBI/TRIAP1/ACSL1/NR1H3/MIF/CES1/PRELID1/EEPD1/PLTP/GPS2/DAB2/ADIPOQ/SCP2/LRP1/PPARG/OXT/TMEM30A/NR1H2/NFKBIA/ABCA5/APOE/ACSL5/RXRA/C1QTNF1/BMP6/SPP1/TREM2/ABCA1/EDN1/SIRT1/FABP3/ZDHHC8/PTGES/LPCAT3/PLA2G4A/LDLRAP1
SC	GOBP_HEART_GROWTH	87	0.333575	1.90047	0.00188679	0.00887008	RBPJ/YY1/MESP1/TOMM70/RBP4/IGF1/TGFBR2/TGFBR3/DUSP6/PTEN/CITED2/SAV1/MAPK14/PRKAR1A/YAP1/HEG1/TGFBR1/PARP2/S1PR1/MEF2C/PIM1/PI16/RGS2/NOTCH1/BASP1/EDN1/ACACB/AGT/SMAD1/G6PD/FGF2/AKAP13
SC	GOBP_EMBRYONIC_PLACENTA_DEVELOPMENT	87	0.348369	1.98475	0.00188679	0.00887008	RBPJ/CDKN1C/NSDHL/GGNBP2/EPAS1/HECTD1/TRIM28/CEBPA/ADM/GRB2/RSPO3/CITED2/ZFP36L1/NCOA1/EGFR/DNAJB6/NR2F2/CEBPB/PHLDA2/TMED2/PKD2/FZD5/MAP2K1/AKT1/BPTF/PCDH12/MDFI/BIRC6/HEY1/HES1/IGF2/JUNB/SETD2
SC	GOBP_RESPONSE_TO_CAMP	88	0.379033	2.17664	0.00188679	0.00887008	APEX1/CDO1/GPD1/HSPA5/ASS1/BSG/STAT1/PFKFB1/NDUFS4/INPP5K/BIRC2/AQP1/ADIPOQ/ZFP36L1/DMTN/IGFBP5/INHBB/OXT/KDM1A/CRHBP/PDE2A/EZR/PCK1/PKD2/FDX1/RAPGEF1/COL1A1/APP/AKAP9/MMP19/PER1/PENK/RAP1A/RAPGEF3/CYP1B1/ITPR2/SREBF1
SC	GOBP_PROTEIN_LOCALIZATION_TO_CHROMOSOME	87	0.386902	2.20429	0.00188679	0.00887008	VCP/CCT5/TCP1/XRCC5/RPA1/CCT7/CCT8/CCT6A/CCT4/BOD1/TERF2IP/PIH1D1/ATRX/PARP3/RPA2/TPP1/GNL3/CCT3/RAD21/NIPBL/IK/PINX1/DKC1/CHMP7/SPIDR/CCT2/SGF29/XRCC4/BUB3/NABP2/ACD/WAPL/LEMD2/TNKS2/ZW10/RB1/SLF1/RUVBL2
SC	GOBP_MIDBRAIN_DEVELOPMENT	87	0.38771	2.20889	0.00188679	0.00887008	DYNLL1/YWHAQ/COX6B1/RHOA/MAOB/CALM1/HSPA5/GLUD1/CKB/YWHAE/YWHAH/UQCRQ/ACTB/CALM2/UCHL5/NDUFS3/CALM3/WLS/SFRP1/MAPKAP1/ZNF148/SEC16A/SOS1/SFRP2/KAT2A/CMA1/CSNK1E/RYK/NDRG2/HES1/CTNNB1/BASP1/CNP/MSX1/FZD6/CDC42/SMAD1/G6PD/FGF2
SC	GOBP_NEGATIVE_REGULATION_OF_VIRAL_PROCESS	87	0.392285	2.23495	0.00188679	0.00887008	LARP7/SRPK2/STAT1/GSN/BANF1/TNIP1/PPIA/INPP5K/SNX3/IFITM3/BST2/TRIM28/IFITM2/MPHOSPH8/IFITM1/ISG15/APOBEC3C/SRPK1/HEXIM1/IFI16/ILF3/LY6E/PLSCR1/TRIM32/N4BP1/ZC3HAV1/MID2/IFIT1/TRIM26/TRIM21/TRIM27/IFIT5/IFIH1/ZFP36/ZNFX1/SLPI/UBP1/PARP10/TRIM13/CH25H
SC	GOBP_POSITIVE_REGULATION_OF_NEURON_DEATH	87	0.411773	2.34599	0.00188679	0.00887008	RHOA/ATF4/SRPK2/CLU/FYN/DDIT3/CAPN2/NQO1/EIF2S1/BAD/DAXX/NUPR1/GRN/C1QA/PICALM/AIMP2/PARP1/ABL1/REST/CDK5/CDC34/TYROBP/DDIT4/UBE2M/FOXO3/FBXW7/MCL1/ITGB2/PRNP/CCL3/BACE1/CTNNB1/EFNB2/ATF2/TLR4/MAP3K5/CASP3/CDC42/AIFM1/SNCA/FOS/EGR1
SC	GOBP_GLYCOSYL_COMPOUND_METABOLIC_PROCESS	87	0.421415	2.40091	0.00188679	0.00887008	AKR1C3/DGUOK/NME4/ATIC/AKR1C2/DNPH1/AKR1C1/TK2/APRT/AKR7A2/FUCA2/FUCA1/HPRT1/DERA/NT5C3A/NAGA/CDADC1/MACROD1/GLA/ADK/APOBEC3C/GBA/TYMP/NUDT1/ADA/UCKL1/AKR1A1/PRTFDC1/ABHD10/ICMT/PRPS1/ERH/OARD1/DTYMK/PRPS2/NT5E/ENPP4/TYW1/NME5/UPP1
SC	GOBP_POSITIVE_REGULATION_OF_SMOOTH_MUSCLE_CELL_PROLIFERATION	88	0.418267	2.40194	0.00188679	0.00887008	PHB/MFN2/STAT1/AIF1/IGF1/TGFBR2/MMP2/MNAT1/PDGFRB/IGFBP5/GNAI2/CYBA/THBS1/PDGFD/RBPMS2/NPY5R/IRAK1/S1PR1/ID2/BMP4/AKT1/ZNF143/MYD88/PIK3CA/EDN1/JUN/HPGD/TLR4/MAP3K5/HMOX1/MEF2D/NOTCH3/AGT/GJA1/MYC/MMP9/PDGFB/FGF2/FOXJ2/JAK2/ELANE/FRS2/LDLRAP1/HDAC1
SC	GOBP_CELLULAR_RESPONSE_TO_UV	88	0.437878	2.51456	0.00188679	0.00887008	XPA/YY1/ATF4/TRIAP1/EIF2S1/PCNA/COPS9/SMPD1/NPM1/MFAP4/TREX1/MMP2/USP47/CARD16/PARP1/AQP1/XPC/CRIP1/TIMP1/HYAL2/KDM1A/RPL26/CUL4B/EIF2AK4/MME/TMEM161A/PIK3R1/ERCC1/N4BP1/IMPACT/C9orf116/RHBDD1/ZBTB1/POLD3/CDKN1A/RUVBL2/TP53INP1/PPID/FMR1/SIRT1/MYC/MMP9
SC	GOBP_NEGATIVE_REGULATION_OF_MRNA_METABOLIC_PROCESS	88	0.471422	2.70719	0.00188679	0.00887008	YBX1/NELFE/CSDE1/SAP18/HNRNPD/CIRBP/THRAP3/RNF20/HNRNPC/NBAS/RBM42/HNRNPK/SRSF7/C1QBP/PABPC1/SRSF9/HNRNPAB/SYNCRIP/CTR9/SRSF10/RNF40/PAIP1/MAPK14/PTBP1/SRSF6/RBM10/LARP1/CDK9/YBX3/DHX9/SUPT5H/TARDBP/HNRNPU/HNRNPA2B1/TOB1/MAPKAPK2/PCBP4/HNRNPA0/SRSF4/RBMX/MYD88/RNPS1/FMR1/SFSWAP/CCNT1/LARP4B/ZFP36/SECISBP2/U2AF2
SC	GOBP_POSITIVE_REGULATION_OF_PROTEASOMAL_UBIQUITIN_DEPENDENT_PROTEIN_CATABOLIC_PROCESS	88	0.500691	2.87527	0.00188679	0.00887008	VCP/BCAP31/CAV1/GABARAP/RBX1/CLU/SUMO1/DDRGK1/RACK1/PSMD10/NFE2L2/STUB1/ZFAND2A/HSPBP1/HERPUD1/DAB2/KEAP1/HECTD1/CEBPA/HSPA1A/CSNK1A1/MKRN2/UBQLN2/PIAS1/SUMO2/GBA/UBQLN1/TRIB2/BBS7/USP5/ZER1/DNAJB2/CSNK1E/SGTA/RNF19A/AKT1/DVL1/ANKIB1/TRIB1/RAD23A/RCHY1/RNF180/SH3RF1/NUB1/RNF19B/SIRT6/HSPA1B/RNF144B/PSEN1/RNF14
SC	GOBP_CELL_DEATH_IN_RESPONSE_TO_OXIDATIVE_STRESS	88	0.545081	3.13018	0.00188679	0.00887008	SOD1/GPX1/PINK1/ZNF622/ARL6IP5/ATF4/HTRA2/P4HB/FYN/NOL3/HSPB1/PARK7/PDCD10/RACK1/TXN/NFE2L2/PPIA/FBXO7/NONO/SIGMAR1/PARP1/STK24/ABL1/REST/STK25/SFPQ/GBA/UBQLN1/FOXO3/BCL2/TRAP1/BAG5/ENDOG/OXR1/LANCL1/FBXW7/GFER/AKT1/RIPK1/MCL1/CYP1B1/NME5/TREM2/CTNNB1/SIRT1/TLR4/MAP3K5/PDE8A
SC	GOBP_REGULATION_OF_RESPONSE_TO_OXIDATIVE_STRESS	88	0.578432	3.32171	0.00188679	0.00887008	SOD1/GPX1/CD36/PINK1/AIFM2/ATF4/HTRA2/P4HB/FBLN5/FYN/NOL3/HSPB1/PARK7/RACK1/TXN/NFE2L2/PPIA/FBXO7/HEBP2/NONO/PARP1/SESN1/ABL1/REST/H19/SFPQ/PNPLA8/UBQLN1/MAPKAP1/ACOX2/FOXO3/SESN2/TRAP1/BAG5/ENDOG/OXR1/LANCL1/FBXW7/GFER/AKT1/RIPK1/MCL1/SESN3/NME5/TREM2/CTNNB1/STOX1/SIRT1/TLR4/PDE8A
SC	GOBP_MITOCHONDRIAL_RESPIRATORY_CHAIN_COMPLEX_ASSEMBLY	88	0.718109	4.12381	0.00188679	0.00887008	NDUFAB1/NDUFAF3/NDUFA2/NDUFB8/NDUFB7/NDUFS5/UQCRFS1/NDUFA13/COX14/NDUFA11/NDUFA8/NDUFAF2/TMEM126A/NDUFB9/SDHAF2/NDUFB4/NDUFA6/NDUFB6/NDUFB11/NDUFA10/NDUFC1/TMEM126B/SURF1/COA3/SMIM20/NDUFA12/CHCHD4/NDUFB10/COA4/NDUFS2/NDUFA1/NDUFAF4/NDUFS4/NDUFC2/UQCC2/COA5/NDUFS8/ACAD9/SDHAF1/IMMP2L/BCS1L/NDUFB2/NDUFS3/SDHAF3/SAMM50/PET117/COX20/MT-ND1/NDUFA3/COX17/COX16/UQCC3/MT-ND4/NDUFS7/PET100/NDUFB1/OXA1L/N…
SC	GOBP_ATP_SYNTHESIS_COUPLED_ELECTRON_TRANSPORT	87	0.787943	4.48913	0.00188679	0.00887008	NDUFAB1/COX4I1/UQCRH/GHITM/CHCHD2/COX6A1/DGUOK/NDUFA2/NDUFB8/NDUFB7/NDUFS5/UQCRFS1/NDUFV2/COX5B/COX7A2L/PINK1/ISCU/NDUFS6/NDUFA8/COX5A/NDUFB9/NDUFV1/SDHAF2/NDUFB4/NDUFA6/NDUFB6/NDUFA10/NDUFC1/DNAJC15/UQCR10/UQCRQ/PARK7/NDUFA12/NDUFB10/NDUFS2/NDUFA1/NDUFS4/NDUFC2/NDUFA4/NDUFS8/CYC1/COQ9/COX7A1/DLD/NDUFB2/NDUFS3/COX7C/MT-CO3/MT-CYB/COA6/NDUFC2-KCTD14/SDHA/MT-ND1/COX4I2/NDUFA3/MT-CO1/MT-CO2/UQCRB/UQ…
SC	GOBP_BODY_FLUID_SECRETION	90	0.345843	1.99609	0.00189394	0.00887008	VAMP3/CAV1/CDO1/SLC29A1/PAM/MTX1/NR1H3/STAT5A/XBP1/NPR1/APRT/NME1/CCND1/ATG5/VAMP8/COPA/AQP1/WNK1/NPR3/CYBA/ADA/MT-CO2/USF2/NR1H2/STAT5B/STK39/VAMP2/SOCS2/EDN1/NCOR2/GJA1/GPAT4/DDR1/ZBTB7B/FGF10
SC	GOBP_ACTIVATION_OF_CYSTEINE_TYPE_ENDOPEPTIDASE_ACTIVITY_INVOLVED_IN_APOPTOTIC_PROCESS	80	0.371334	2.07836	0.00189394	0.00887008	VCP/BEX3/ANP32B/BOK/MTCH1/DAP/HSPD1/IFT57/MUL1/BAD/FAM162A/RACK1/PDCD2/CASP1/SMAD3/CASP4/PYCARD/HSPE1/DLC1/PDCD6/PPARG/CTSH/LAPTM5/CYCS/S100A9/BID/AIFM1/SNCA/S100A8/RPS27L/BCL2L13/JAK2/ST20/DIABLO/NOD1/CRADD
SC	GOBP_NEGATIVE_REGULATION_OF_TRANSPORTER_ACTIVITY	90	0.377917	2.18122	0.00189394	0.00887008	C4orf3/NDFIP1/CAV1/CALM1/ADRA2A/SRI/SUMO1/YWHAE/GOPC/CALM2/GSTO1/FKBP1A/PPIF/CALM3/SLC9A3R1/OXSR1/TWIST1/UBQLN1/CAB39/STK39/GSTM2/REM1/CRBN/PKD2/TRDN/WWP2/CAMK2D/FKBP1B/ATP1A2/NDFIP2/CTTNBP2NL/FMR1/NEDD4L/KCNAB1/MMP9/SNCA/PLN/GEM/RRAD/CLIC2
SC	GOBP_NEGATIVE_REGULATION_OF_NF_KAPPAB_TRANSCRIPTION_FACTOR_ACTIVITY	90	0.391619	2.2603	0.00189394	0.00887008	MTURN/TAX1BP1/DAP/DDIT3/PRMT2/COMMD7/PRDX2/RBCK1/COMMD6/PSMD10/CAT/TMSB4X/RWDD3/COMMD1/MAP2K5/BRMS1/PYCARD/UFL1/SETD6/CCDC22/USP7/CDK5RAP3/PPP2CB/NFKBIA/TCEAL7/PIAS4/IRAK1/NFKBIL1/TRIM21/CHP1/CYP1B1/PELI1/CMKLR1/KLF4/CD200/SIRT1/BCL3/ERBIN/TRIM37/TNFAIP3/PARP10/ARRB1/DAB2IP/LRRC14/CHUK/FAF1
SC	GOBP_REGULATION_OF_EPITHELIAL_CELL_APOPTOTIC_PROCESS	90	0.422495	2.43851	0.00189394	0.00887008	AKR1C3/WFS1/BOK/GSN/CAST/EIF2S1/BAD/NFE2L2/TNIP2/NUPR1/ANGPTL4/CD248/RAMP2/ECSCR/GAS6/MDK/SFRP4/ZFP36L1/ABL1/GPER1/H19/SRSF6/CDH5/FOXO3/THBS1/YAP1/TCF7L2/RGCC/PIAS4/ANGPT1/PDCD4/TEK/RB1/KDR/HMOX1/ANO6/ZFP36/CCL2/TNFAIP3/ICAM1/CD40/JAK2/KRIT1
SC	GOBP_STEROL_HOMEOSTASIS	93	0.298566	1.73728	0.00190114	0.00887008	CAV1/LPL/NR1H3/NPC2/CNBP/CES1/FABP4/AKR1C1/LAMTOR1/XBP1/DGAT2/LIMA1/INSIG1/RALY/MYLIP/EPHX2/EHD1/TSKU/GPIHBP1/COMMD9/NR1H2/ABCA5/APOE/SREBF2/LRP5/APOM/SCARB1/ABCA1/NR1D1/SIRT1
SC	GOBP_DICARBOXYLIC_ACID_METABOLIC_PROCESS	93	0.380688	2.21512	0.00190114	0.00887008	IDH3B/ATIC/ME3/MTHFS/GLUD1/ASS1/MDH2/PHYH/KYAT3/GRHPR/ADHFE1/MDH1/ME1/FH/SDHB/ALDH4A1/FPGS/ACOT8/GLUL/IDH1/SDHAF3/ACLY/ALDH18A1/AASDHPPT/SDHA/MRPS36/NIT2/GOT1/ACOT4/SHMT2/OGDH/IDH2/PCK1/SUCLA2/PCK2/OAT/SHMT1/HAAO/SLC25A12/GLS/MTHFD1/MTRR/GPT2/DHFR/SLC19A1/ALDH1L1
SC	GOBP_POSITIVE_REGULATION_OF_LEUKOCYTE_CHEMOTAXIS	93	0.395053	2.2987	0.00190114	0.00887008	HMGB1/RARRES2/RAC1/CREB3/VEGFB/C1QBP/AIF1/CD74/CXCL12/GAS6/OXSR1/MDK/CSF1R/C3AR1/WNK1/ZNF580/THBS4/CALR/THBS1/STK39/SWAP70/AKIRIN1/LBP/GPSM3/VEGFD/CSF1/RAC2/CCL3/CCL4/CMKLR1/DNM1L/CCL19/EDN1/CXCL10/ANO6/VEGFC/CCR1/LGALS9/CCL21/PLA2G7/MCU/LGMN/PTN
SC	GOBP_CELLULAR_RESPONSE_TO_KETONE	93	0.406243	2.36382	0.00190114	0.00887008	AKR1C3/NR3C1/SERPINF1/AKR1C2/GNG2/ASS1/CDK4/RWDD1/NCOA4/GNB1/PARK7/AR/POSTN/ATP2B1/MSN/SFRP1/GOLPH3/GAS6/AQP1/LARP1/DDIT4/FOXO3/SMYD3/KLF2/PCK1/FDX1/ADAM15/PCK2/AKT1/ROCK2/KLF9/ADCY3/CYP1B1/EFNA5/SPP1/ERRFI1/PTGER4/SIRT1/CBX3/PTGER2/MYC/SGK1/ADCY5/AIFM1/PTGFR
SC	GOBP_TYPE_I_INTERFERON_PRODUCTION	93	0.432898	2.51891	0.00190114	0.00887008	HSP90AA1/YY1/FLOT1/HSPD1/PQBP1/STAT1/TOMM70/BANF1/CD14/GAPDH/OTUD5/RNF135/TREX1/ZBTB20/PYCARD/NMI/RNF26/SIRPA/PTPN11/ISG15/DHX9/HMGB2/G3BP1/IRAK1/IRF8/DTX4/RNF216/GPATCH3/IRF7/ZCCHC3/POLR3F/RIPK2/TRIM21/MYD88/TICAM1/IRF3/IFIH1/TLR4/SETD2/POLR3C/RIOK3/PPM1B/NLRX1/SYK
SC	GOBP_CELLULAR_RESPONSE_TO_UNFOLDED_PROTEIN	93	0.580169	3.37585	0.00190114	0.00887008	TMBIM6/VCP/SERP1/WFS1/OS9/HSPA8/OPTN/BOK/HSPD1/HSPA5/ATF4/CREB3/DDIT3/DDRGK1/RHBDD2/XBP1/EIF2S1/RACK1/NFE2L2/DAXX/CCND1/STUB1/DERL1/ERLEC1/DERL2/HERPUD1/HSPA1A/MBTPS1/UFL1/BAG3/BFAR/DNAJB9/CDK5RAP3/HSPA14/ATF6/HSPB8/HSF1/TMED2/PIK3R1/QRICH1/NCK1/FICD/VAPB/SERP2/PARP16/CREB3L2/HSPA9/RHBDD1/PTPN1/HSPA6/PPP1R15A
SC	GOBP_REGULATION_OF_NOTCH_SIGNALING_PATHWAY	89	0.33479	1.92649	0.00191205	0.00887008	ITGB1BP1/YTHDF2/MESP1/PDCD10/SLC35C1/POSTN/DTX1/TSPAN15/BCL6/EGFL7/ZMIZ1/RITA1/RFNG/MFNG/YAP1/NFKBIA/IL6ST/FBXW7/SREBF2/ZBTB7A/AKT1/WWP2/ARRDC1/NEPRO/HEY1/HES1/NOTCH1/STAT3/CDK3/CCNC/FGF10/JAG1/JAG2/GALNT11/ARRB1/SLC35C2/MMP14
SC	GOBP_LEUKOCYTE_HOMEOSTASIS	89	0.380483	2.18942	0.00191205	0.00887008	HMGB1/PPP3CB/PPP2R3C/MIF/ANXA1/RPS6/CAMLG/GPAM/HCAR2/DOCK11/CD74/TSC22D3/ABL1/FADD/BAP1/ADA/SLC40A1/SOS1/STAT5B/BCL2/TNFSF13B/AXL/JAM3/CORO1A/SH2B3/GPR183/AKT1/MEF2C/SIT1/XKR8/TCIRG1/RC3H1/CASP3/LGALS9/SOS2/LGALS2/SLC39A3/TNFAIP3/KITLG/RIPK3
SC	GOBP_REGULATION_OF_FATTY_ACID_METABOLIC_PROCESS	89	0.403328	2.32088	0.00191205	0.00887008	ACADVL/CAV1/EIF6/NR1H3/ANXA1/DGAT2/PDK2/INSIG1/ELOVL5/FABP5/CD74/TREX1/TWIST1/ADIPOQ/PPARG/MLXIPL/LONP2/NR1H2/ERLIN1/AVP/TYSND1/SCAP/PDK4/APOC1/AKT1/ABCD2/SREBF1/LPGAT1/IRS2/RGN/SIRT1/APPL2/ACACB/FABP3/PIBF1/SNCA/ERLIN2
SC	GOBP_RNA_DESTABILIZATION	89	0.422957	2.43383	0.00191205	0.00887008	POLR2G/YBX1/CSDE1/LSM1/YTHDF2/DCP1A/HNRNPD/PUM1/YTHDF1/PABPC1/RIDA/CELF1/SYNCRIP/CNOT8/EXOSC5/PAIP1/ZFP36L1/CNOT7/ZFP36L2/DHX9/TARDBP/HNRNPU/ROCK1/MLH1/NT5C3B/EXOSC7/EXOSC8/TOB1/UPF1/ROCK2/BTG2/CNOT2/DXO/PAN3/EXOSC9/TNFRSF1B/DCP1B/CNOT1/RC3H1/EXOSC3/TNRC6A/ZFP36
SC	GOBP_ADP_METABOLIC_PROCESS	89	0.436301	2.51062	0.00191205	0.00887008	ENO1/EIF6/GPD1/PGK1/ALDOA/PGM1/TPI1/AK2/PFKFB1/BAD/LDHA/GAPDH/NUPR1/JMJD8/IGF1/AK3/ALDOC/TREX1/ARL2/ZBTB20/BPGM/PGAM1/PKM/PRKAG1/AK1/HK1/DDIT4/AK4/MLXIPL/OGT/OGDH/GALK1/PFKL/APP/FBP1/PGAM2/NT5E/ZBTB7A/INSR/GPI/PFKP/STAT3/GIT1
SC	GOBP_MUSCLE_CELL_MIGRATION	89	0.451944	2.60063	0.00191205	0.00887008	ITGB1BP1/APEX1/RHOA/S100A11/GNA12/ANXA1/NFE2L2/CRK/PARVA/AIF1/IGF1/CORO1B/IGFBP3/AAMP/MDK/ADIPOQ/PDGFRB/IGFBP5/LRP1/NRP1/THBS4/SIX1/PDGFD/PLEKHO1/ROCK1/BCL2/AKIRIN1/GNA13/NET1/BIN3/MEF2C/TRIB1/CYP1B1/ARPC5/TLR4/SLIT2/AGT/TPM1/MYC/DDR1/MIR223/PDGFB
SC	GOBP_NEGATIVE_REGULATION_OF_EPITHELIAL_CELL_MIGRATION	89	0.488411	2.81047	0.00191205	0.00887008	ITGB1BP1/HMGB1/ATP2B4/CSNK2B/SERPINF1/CORO1C/RHOA/SVBP/PDCD10/MMRN2/ADIPOR1/PFN2/DCN/MAP2K5/PTPRM/PTEN/PPARG/NR2F2/THBS1/GADD45A/RGCC/APOE/JUP/MEF2C/MEOX2/STARD13/ACVRL1/NOTCH1/HDAC5/PTPN23/EVL/KLF4/DNAJA4/SLIT2/FGF2/KRIT1/PATZ1/DAB2IP/SEMA3A/DUSP10/ADAMTS9/SYNJ2BP/TACSTD2
SC	GOBP_POSITIVE_REGULATION_OF_PROTEIN_POLYMERIZATION	89	0.493408	2.83923	0.00191205	0.00887008	HSP90AA1/PINK1/RHOA/MAP1B/RAC1/PFN1/SNX9/DRG1/MAPRE1/RPS3/DCTN1/BIN1/ARL3/ARPC2/CDC42EP2/PFN2/ARL2/CDC42EP4/ARF6/GRB2/CTTN/HSPA1A/CKAP5/PYCARD/SLAIN2/MLST8/BAG4/LMOD1/TPPP3/CDC42EP1/FES/PAK1/CDK5RAP2/AKAP9/NCK1/FCHSD2/CDKN1B/NUMA1/MTOR/EVL/GIT1/CDC42EP5/CDC42EP3/ANKRD53/NIN/HSPA1B/CCL21
SC	GOBP_CELLULAR_OXIDANT_DETOXIFICATION	89	0.501034	2.88311	0.00191205	0.00887008	SOD1/GPX1/PRDX6/CD36/PXDN/PRDX1/GPX4/GSTP1/MGST2/TXNDC17/PRDX4/PRDX5/MGST1/FBLN5/PRDX2/MGST3/PARK7/NQO1/TXN/NFE2L2/GSTK1/CCS/CAT/GSTO1/PRDX3/ALOX5AP/GPX7/SOD3/GPX3/GLRX/LTC4S/SESN1/H19/CYGB/SESN2/GSTM2/APOE/TXNRD3/APOM/S100A9/TP53INP1/SRXN1/HBB/HBA2/GPX8/TXNRD1/HBA1/HBM/PTGES/CLIC2/DHFR/HBG2/GSTZ1/HBQ1/HBD
SC	GOBP_MITOCHONDRIAL_TRANSMEMBRANE_TRANSPORT	89	0.513662	2.95578	0.00191205	0.00887008	SLC25A6/STOML2/MRPL18/TST/TIMM23/TOMM20/MPC1/HSPD1/GRPEL1/SLC25A5/SMDT1/DNAJC15/TOMM70/SLC25A1/MPC2/SLC25A28/SLC25A20/DNAJC19/CHCHD4/SLC25A3/PAM16/CCDC51/ROMO1/VDAC1/UCP2/SFXN4/SLC25A36/TOMM7/SLC25A4/MCUB/SLC25A38/MT-ATP6/PSEN2/MICU3/DNAJC30/PMPCB/SLC25A13/MT-ATP8/TIMM17B/DNLZ/MICU1/AFG3L2/SLC25A12/TOMM40L/TIMM44/TIMM17A/AIFM1/SLC25A37
SC	GOBP_REGULATION_OF_PROTEIN_DEPHOSPHORYLATION	89	0.566271	3.25851	0.00191205	0.00887008	HSP90B1/HSP90AB1/YWHAB/PPP2R5A/PINK1/CSNK2B/PPP1R7/CALM1/BOD1/PPP1R11/YWHAE/GNA12/CRY2/CAMTA1/CALM2/SMPD1/PPIA/FKBP1A/TIPRL/ARPP19/PPP1R1B/CALM3/LGALS3/PDGFRB/DLC1/GNAI2/PTBP1/STYXL1/GBA/CDH5/PPP1R12A/PPP6R3/ROCK1/SWAP70/PPP2R5D/SLC39A10/PIN1/PPP6R2/PPP1R8/ROCK2/PPP1R16A/FKBP1B/NUAK1/MGAT5/MTOR/HTT/NSMF/PPP1R15A/RGN/PTPRC/PPP1R2/BOD1L1/PTPA
SC	GOBP_REGULATION_OF_PH	91	0.30765	1.77052	0.00192308	0.00887008	ATP6V0E1/RAB7A/SNAPIN/TMEM9/PPT1/RNASEK/CLIC4/PDK2/CCDC115/SLC9A9/RAB20/EDNRB/GRN/ATP6AP2/TM9SF4/SLC4A2/ATP6AP1/UBE3A/ATP6V1H/ATP6V0E2/BCL2/AVP/PDK4/ATP6V0D1/AQP11/GPR89A/TCIRG1/CHP1/TMEM175/MAFG/TMEM165/SLAMF8/EDN1/TMEM199
SC	GOBP_DNA_GEOMETRIC_CHANGE	91	0.308913	1.77779	0.00192308	0.00887008	XRCC6/DDX1/XRCC5/HMGB1/RPA1/ANXA1/ATRX/MCM7/TREX1/MCM3/CHD9/MNAT1/NBN/SSBP1/PURA/GTF2F2/MCM6/SETX/DHX9/HMGB2/HELQ/WRNIP1/G3BP1/CHTF8/RECQL/HNRNPA2B1/CHD6/UPF1/RAD50/CHD1L/ERCC3/RUVBL2/RFC3/RFC4/CHD1/CHD3/MCM5/CHD4/DSCC1/SMARCAD1
SC	GOBP_REGULATION_OF_LIPASE_ACTIVITY	91	0.388243	2.23433	0.00192308	0.00887008	ARF4/PHB2/PHB/RHOA/NR1H3/PPT1/ANXA1/ANG/RHOC/HRAS/PLAA/ANGPTL4/FGFR1/ARL1/SORT1/PDGFRB/POR/ABL1/EGFR/LRP1/GPIHBP1/LPAR1/NR1H2/FURIN/GNAQ/ABHD5/GNA13/APOC1/EDNRA/RGS2/CD86/AGT/P2RY12/SNCA/PDGFRA/FGF2/AGTR1/HTR2B
SC	GOBP_THIOESTER_METABOLIC_PROCESS	91	0.438661	2.52449	0.00192308	0.00887008	ACSS2/GLYAT/ACOT2/PDHA1/ACSL1/PPT1/PPCS/SLC25A1/MPC2/DGAT1/DGAT2/ELOVL1/PDK2/PMVK/GPAM/NUDT8/ELOVL5/ACSM5/DLD/ACOT8/OXSM/ACOT1/ACLY/TECR/ACSL3/ACAT1/NUDT7/ACOT4/OGDH/GCDH/SUCLA2/PDK4/SUCLG2/ACSL5/PPT2/ELOVL3/ACSL4/ACOT7/ACSF2/FAR1/HSD17B4/PDHB/DLAT/ACACB/GPAT4/SNCA
SC	GOBP_MAINTENANCE_OF_PROTEIN_LOCATION	91	0.535836	3.08373	0.00192308	0.00887008	KDELR2/YWHAB/CAV1/OS9/PINK1/SKP1/RER1/HSPA5/SRI/TSPO/GOPC/GSN/PARK7/ARL2BP/PSMD10/TXN/TMSB4X/KDELR3/GPAA1/INSIG1/KEAP1/TWF2/ARL2/FBN1/GET4/GOLPH3/DBN1/NBL1/CDK5/BBS4/TMSB10/CCDC22/TAF3/HK1/TOPORS/FLNA/CHCHD10/HNRNPU/SUN2/NFKBIA/TWF1/PKD2/CD4/SUPT7L/SRGN/SUN1/AKT1/MDFI/ANKRD13C/VPS13D/KDELR1/CIZ1
SC	GOBP_INTERLEUKIN_8_PRODUCTION	92	0.309887	1.79024	0.00193424	0.00887008	HMGB1/DDIT3/ANXA1/LEP/PARK7/CD14/LAMTOR5/TMSB4X/RAB1A/CD74/CD58/MAP2K5/HSPA1A/PYCARD/ADIPOQ/FADD/ZNF580/HYAL2/RELA/LBP/RIPK1/IL17D/MYD88/CD2/STAT3/KLF4/BCL3/TLR4/PTPRC/LGALS9/SYK/HSPA1B/CHI3L1/ELANE/ARRB1/DDX58/NOD1/PRKD2
SC	GOBP_REGULATION_OF_STEROID_METABOLIC_PROCESS	101	0.349931	2.07498	0.00193424	0.00887008	SOD1/AKR1C3/ACADVL/CES1/SF1/TSPO/LAMTOR1/ASAH1/LEP/DGAT2/STUB1/NFKB1/INSIG1/DAB2/ADM/EPHX2/MBTPS1/DHCR7/POR/REST/IGFBP7/FGF1/STAT5B/ERLIN1/APOE/SCAP/APOC1/ARV1/BMP6/ATP1A1/BMP2/SREBF1/H6PD/NR1D1/SIRT1/SNAI2/AGT/EGR1/ERLIN2/AGTR1/LPCAT3
SC	GOBP_NEGATIVE_REGULATION_OF_CELLULAR_RESPONSE_TO_GROWTH_FACTOR_STIMULUS	101	0.358026	2.12297	0.00193424	0.00887008	ATP2B4/HTRA1/UBE2D3/FSTL3/MMRN2/ADAMTS12/DCN/CHRDL1/FBN1/SFRP1/TRIM33/NBL1/ABL1/UBE2D1/PDCD6/HTRA3/PPARG/HIPK2/PPM1A/BAMBI/THBS1/SPRY1/GPC1/SFRP2/RBPMS2/TOB1/SPRY2/SULF2/CRIM1/SMURF1/LEMD2/EMILIN1/HGS/NOTCH1/PTPN1/TNFAIP6/SKI/SPRY4/SLIT2/AGT/ADGRA2/SULF1/FGF2/FUZ
SC	GOBP_REGULATION_OF_PATTERN_RECOGNITION_RECEPTOR_SIGNALING_PATHWAY	101	0.363608	2.15608	0.00193424	0.00887008	RTN4/CD36/HMGB1/CAV1/FLOT1/PUM1/NR1H3/GPR108/ANKRD17/FLOT2/C1QBP/GPS2/BIRC2/HSPA1A/NINJ1/RAB7B/CYBA/UBQLN1/IFI35/PJA2/ZDHHC5/LBP/NFKBIL1/GPATCH3/WDFY1/IRF7/PUM2/ZCCHC3/TSPAN6/PELI1/SLC15A3/TREM2/NR1D1/BIRC3/TLR4/APPL2/TICAM2/RIOK3/ERBIN/NLRX1/APPL1/LGR4/TNFAIP3/HSPA1B/PTPRS/CD300A/DAB2IP/DDX60/LRRC14/TLR1/DDX3X
SC	GOBP_HOMOTYPIC_CELL_CELL_ADHESION	92	0.379915	2.1948	0.00193424	0.00887008	CD99/GNAS/RDX/CLIC1/MYL12A/XG/ILK/HSPB1/ACTB/JAK1/PPIA/MYL9/MYH9/ACTN1/ACTG1/VCL/BLOC1S4/TLN1/PLPP3/DMTN/FIBP/FLNA/CD9/FN1/IL6ST/CTSG/STXBP1/SH2B3/JUP/PLEK/FERMT3/CSRP1/C1QTNF1/PTPN6/ZNF703/PEAR1/ADAMTS18/HBB/P2RY12/TJP2/METAP1/PDGFRA/SYK/PLAUR/JAK2
SC	GOBP_POSITIVE_REGULATION_OF_PLASMA_MEMBRANE_BOUNDED_CELL_PROJECTION_ASSEMBLY	101	0.372139	2.20666	0.00193424	0.00887008	BRK1/FAM98A/RALA/WASF2/RAC1/PFN1/RHOQ/CYFIP1/DOCK11/MIEN1/ARPC2/CDC42EP2/HRAS/TWF2/EPS8/CDC42EP4/ATMIN/NDEL1/BBS4/NRP1/PPP1R35/DPYSL3/WASL/DEF8/CDC42EP1/ARHGAP35/ACTR2/ACTR3/AKIRIN1/TGFBR1/PALM/PIK3R1/RAC2/FNBP1L/MTOR/HTT/PIK3CA/CCL19/FMR1/CDC42/P2RY12/CDC42EP5/SRF/CDC42EP3/FUZ/MNS1/ARAP1/CCL21
SC	GOBP_POSITIVE_REGULATION_OF_HISTONE_MODIFICATION	101	0.41539	2.46313	0.00193424	0.00887008	NELFE/C6orf89/PINK1/SNW1/PAF1/WDR61/PIH1D1/MCRS1/RNF20/LMNA/KMT2E/SAP30BP/RTF1/UBE2N/CTR9/ING2/PHF1/RNF40/BCL6/NIPBL/CHTOP/SART3/WBP2/CTBP1/CDK9/WDR5/KDM1A/OGT/KAT2A/PHF20/APLNR/HCFC1/MTF2/BRD4/CTNNB1/SREBF1/ARID5A/RUVBL2/FMR1/SIRT1/KANSL2/AKAP8L/SNAI2/PAXBP1/BRD7/PRKD1/ZBTB7B/RRP8/SUV39H1/PHF19/ARRB1
SC	GOBP_POSITIVE_REGULATION_OF_PROTEIN_LOCALIZATION_TO_MEMBRANE	101	0.444872	2.63794	0.00193424	0.00887008	CIB1/KIF5B/PGRMC1/PDCD5/ITGB1BP1/ITGB1/ATP2B4/MFF/CD81/RER1/SQSTM1/FIS1/FYN/RANGRF/MYO1C/SPTBN1/RACK1/SORBS1/HRAS/RHOG/ARF6/LGALS3/STOM/ACSL3/EGFR/GPER1/CDK5/LRP1/AP2B1/NMT1/RAMP3/EZR/ZDHHC5/CNST/ZDHHC2/ATP2C1/PIK3R1/SLC5A3/AKT1/TCAF1/ITGB2/CLIP3/PRNP/CHP1/STX4/TREM2/TNFAIP6
SC	GOBP_FATTY_ACID_CATABOLIC_PROCESS	101	0.505468	2.99726	0.00193424	0.00887008	ACADVL/HADHB/HADHA/HSD17B10/ECH1/ACAA2/PHYH/ACADS/HACL1/LEP/ACAA1/DECR1/ECHS1/ETFB/NUDT8/CRAT/ACADM/ACOT8/ACAT2/MCAT/TWIST1/ADIPOQ/ACAD11/ETFA/ACAT1/BDH2/SCP2/ECI2/HADH/ILVBL/ECI1/ACOX2/LONP2/NUDT7/AIG1/FAAH/SESN2/GCDH/PCK1/TYSND1/AUH/PCK2/LPIN2/AKT1/ECHDC2/ABCD2/ACOX3/HSD17B4/SLC25A17/ACOX1/IRS2/DECR2/ACACB/PCCB/ETFDH/ABCD3
SC	GOBP_REGULATION_OF_ACTIN_FILAMENT_BUNDLE_ASSEMBLY	101	0.50742	3.00884	0.00193424	0.00887008	LIMCH1/ITGB1BP1/RDX/RHOA/WASF2/RAC1/PFN1/MKKS/RHOC/S100A10/INPP5K/FERMT2/ACTG1/PFN2/SMAD3/SYNPO/SFRP1/TESK1/DLC1/ABL1/BBS4/TJP1/NRP1/MYOC/BAG4/SORBS3/LPAR1/FLNA/ID1/ROCK1/PXN/PPFIA1/SYNPO2/SWAP70/TGFBR1/RGCC/S1PR1/PAK1/PIK3R1/PLEK/ROCK2/RAPGEF3/ARHGEF15/FHOD1/MTOR/EVL/CD47/WNT11/PTGER4/CDC42/PHLDB2/SDC4/TPM1/CORO2B/MTSS1/ARHGEF10L/ARAP1/STMN1
SC	GOBP_POST_GOLGI_VESICLE_MEDIATED_TRANSPORT	101	0.511428	3.0326	0.00193424	0.00887008	VAMP3/VTI1B/RAB10/OPTN/GOLGA4/AP3S1/GOPC/SPTBN1/SCAMP2/RABEP1/VAMP5/SCAMP3/RACK1/RAB34/KLHL20/GOLGA7/RAB31/ARL3/COMMD1/SORT1/AP3D1/GOLPH3/CCDC91/ACSL3/VAMP4/CCDC22/EXOC1/RAB14/LAPTM5/SEC16A/ARFRP1/GBF1/RABIF/PKDCC/SYS1/EXOC2/LAMP1/CNST/KIF16B/ATP2C1/VPS52/EXOC6B/WIPI1/MACF1/EXOC4/VAMP2/SNAP23/CSK/GOLPH3L/CCDC93/NSF/ARFGEF2/GGA3/KIF13A/MYO1B/VPS13A/MON2
SC	GOBP_OLIGODENDROCYTE_DIFFERENTIATION	94	0.297341	1.73207	0.00194175	0.00887008	NTRK2/BOK/CLU/CDKN2C/RHEB/WDR1/EIF2B1/EIF2B3/PTEN/MDK/EIF2B5/PRMT5/NCSTN/BNIP3/CDK5/NSUN5/WASF3/ID4/MED12/EIF2B2/TNFRSF21/EIF2B4/HDAC11/CXCR4/HES1/NOTCH1/TNFRSF1B/CTNNB1/MTOR/CNP/DAG1/CSK
SC	GOBP_MYELOID_CELL_ACTIVATION_INVOLVED_IN_IMMUNE_RESPONSE	94	0.302013	1.75929	0.00194175	0.00887008	VAMP3/RABGEF1/SNX6/S100A13/VAMP8/TREX1/GRN/VAMP7/PYCARD/NMI/GAB2/TYROBP/IFI35/PTGDS/STXBP1/FES/LBP/FCER1G/ITGB2/PTPN6/SNX4/RAC2/CCL3/STX4/DNASE1L3/MYD88/TREM2/VAMP2/TICAM1/SNAP23/HMOX1/FGR/BCR/LGALS9/SYK/SUCNR1/ITGAM/CD300A/ANXA3
SC	GOBP_CHEMOKINE_PRODUCTION	95	0.303829	1.77169	0.00194175	0.00887008	HMGB1/GSTP1/LPL/MIF/MUL1/APOD/SIGIRR/AIF1/CD74/MAP2K5/PYCARD/TWIST1/ADIPOQ/CSF1R/SIRPA/ACKR1/LBP/APP/TRIM32/RIPK2/MYD88/TREM2/KLF4/TICAM1/TLR4/HMOX1/ARG2/SNAI2/ERBIN/LGALS9/EGR1/SYK/IL33/ELANE/LILRB4/AGER/MBP/DDX3X/C1QTNF3/SOCS5
SC	GOBP_RESPONSE_TO_CHEMOKINE	94	0.311167	1.81261	0.00194175	0.00887008	CIB1/RHOA/CXCL12/SLIT3/OXSR1/RNF113A/LOX/WNK1/CCL13/CCL14/STK39/ACKR1/CCRL2/SH2B3/CCL18/DUSP1/CXCR4/CCR10/CCL3/CCL4/CMKLR1/TREM2/CCL19/EDN1/CXCL10/ACKR4/SLIT2/CCR1/CCL2/ACKR3/CCL21/PPBP/CCL23/CCL8/CXCL2/CXCL9/FOXC1/CCL26/CXCL1/LRCH1/ZC3H12A/CXCL11/PTK2B/CXCL8/CXCL3
SC	GOBP_NEGATIVE_REGULATION_OF_SMALL_MOLECULE_METABOLIC_PROCESS	97	0.320801	1.8857	0.00194175	0.00887008	SOD1/AKR1C3/ACADVL/ATP2B4/BCKDK/DGAT2/NFKB1/INSIG1/NUPR1/PID1/PARP1/FAM3C/ADIPOQ/REST/H19/PGP/DDIT4/CLK2/ERLIN1/APOE/SCAP/APOC1/FBP1/PLEK/AKT1/BMP2/STAT3/GIT1/SLC25A12/SIRT1/CRY1/APPL2/ACACB/SNAI2/PIBF1/CDA/SIRT6/ERLIN2
SC	GOBP_REGULATION_OF_PHAGOCYTOSIS	97	0.323572	1.90199	0.00194175	0.00887008	SOD1/CD36/HMGB1/LMAN2/RACK1/SNX3/ATG3/RAB31/ATG5/LYAR/C3/PYCARD/GAS6/ADIPOQ/SIRPA/CYBA/CALR/ITGAV/PLSCR1/FCER1G/COLEC11/SCARB1/IL15RA/TREM2/CD47/CSK/APPL2/FGR/MFGE8/ANO6/BCR/PTPRC/CCL2/APPL1/SYK/IL2RG
SC	GOBP_REGULATION_OF_BIOMINERALIZATION	97	0.328316	1.92987	0.00194175	0.00887008	ATRAID/ATF4/DDR2/TXLNG/ATP2B1/SMAD3/MGP/GAS6/TWIST1/ECM1/FAM20C/OSR2/SLC4A2/ISG15/ADRB2/ROCK1/PKDCC/CEBPB/S1PR1/SRGN/BMP4/MEF2C/ROCK2/GPM6B/BMP6/CCL3/OMD/HEY1/NOTCH1/ASPN/BMP2/ACVR2A/LTBP3/ANO6/ACVR1/CCR1/GJA1
SC	GOBP_BONE_MORPHOGENESIS	97	0.339074	1.99311	0.00194175	0.00887008	DHRS3/COL3A1/INSIG1/TGFBR2/ANXA6/TWIST1/CITED2/SFRP4/POR/TSKU/GLG1/OSR2/SERPINH1/ATG9A/FOXN3/EXT1/SFRP2/NAB1/COL1A1/BMP4/LRP5/MEF2C/BMP6/ALPL/INPPL1/THBS3/ATF2/MSX1/SKI/LTBP3/MEF2D/CYP26B1/RARA/ACP5/BMPR2/GHR/RARG/TRIP11/MMP14/PEX7/INSIG2/NAB2/FOXC1/FREM1/GLI3
SC	GOBP_POSITIVE_REGULATION_OF_MITOTIC_CELL_CYCLE_PHASE_TRANSITION	94	0.364572	2.1237	0.00194175	0.00887008	CDC16/APEX1/PHB2/RDX/UBE2E2/ANAPC11/CDK4/ANXA1/CPSF3/ANKRD17/CCND1/LSM10/RAB11A/KMT2E/AIF1/MEPCE/PLRG1/CCND2/EIF4G1/CCND3/TFDP1/EGFR/CUL4B/CDC23/RGCC/CCNB1/APP/AKT1/RRM1/CUL3/BRD4/MAD2L1BP/RB1/STOX1/CDC25B/ANAPC7/FGF10/SASS6/ANAPC4
SC	GOBP_NEGATIVE_REGULATION_OF_ION_TRANSMEMBRANE_TRANSPORT	95	0.371776	2.1679	0.00194175	0.00887008	C4orf3/CAV1/ISCU/ARL6IP5/CALM1/ADRA2A/SRI/SUMO1/YWHAE/GOPC/CALM2/GSTO1/FKBP1A/BIN1/VDAC1/PPIF/COMMD1/CALM3/SLC9A3R1/OXSR1/TWIST1/SESTD1/UBQLN1/CAB39/STK39/GSTM2/REM1/CRBN/PKD2/TRDN/CAMK2D/FKBP1B/SLC30A1/RGS2/ATP1A2/FMR1/NEDD4L/KCNAB1/SLC43A1/MMP9/PLN/GEM/RRAD/CLIC2
SC	GOBP_NEGATIVE_REGULATION_OF_PROTEIN_BINDING	94	0.373167	2.17377	0.00194175	0.00887008	TMBIM6/ITGB1BP1/CAV1/ACTB/PTPRF/PARK7/RACK1/RALB/B2M/STUB1/CTNNBIP1/DAB2/PPP1CA/CARD16/ADIPOQ/DTNBP1/CAMK1/DHRS7B/ADRB2/KDM1A/TFIP11/ADNP/GTF2F1/ID1/ROCK1/LRPAP1/IFIT2/DNAJB2/ADAM15/PIN1/CSNK1E/IFIT1/AKT1/DVL1
SC	GOBP_REGULATION_OF_TOR_SIGNALING	95	0.391233	2.28136	0.00194175	0.00887008	LAMTOR4/RRAGA/LAMTOR2/GNA12/PIH1D1/LAMTOR1/LEP/SEC13/LAMTOR5/ARAF/RHEB/OTUD5/WAC/GOLPH3/GAS6/HDAC3/RRAGD/SESN1/MLST8/PDCD6/GBA/DDIT4/CTNS/SESN2/RRAGB/GPR137B/ENDOG/KPTN/NPRL2/SESN3/NPRL3/SH3BP4/DEPTOR/RRAGC/MIOS/KLHL22/TREM2/PIK3CA/ITFG2/SIRT1/TELO2/BMT2/FNIP1/MTM1/LAMTOR3/C9orf72/WDR24
SC	GOBP_OSTEOCLAST_DIFFERENTIATION	94	0.400703	2.33417	0.00194175	0.00887008	ANXA2/CD81/GPC3/GLO1/TFE3/MAFB/FSTL3/TCTA/MITF/FBN1/SFRP1/MAPK14/FAM20C/CSF1R/GAB2/TYROBP/SNX10/KLF10/TOB2/ATP6AP1/PAFAH1B1/GPR137B/CEBPB/FBXW7/PIK3R1/GPR183/TMEM178A/CSF1/TMEM64/TCIRG1/ESRRA/CCL3/TREM2/CTNNB1/TNFAIP6/PIAS3/MTOR/JUNB/TLR4/CCR1/NOTCH2/TFRC/FOS/SLC9B2
SC	GOBP_RESPONSE_TO_LEUKEMIA_INHIBITORY_FACTOR	95	0.414227	2.41545	0.00194175	0.00887008	MRAS/XRCC5/PCOLCE2/FZD4/SLC25A5/MRPL15/CACYBP/SRM/PDCD10/SRSF3/SRSF7/NCL/ARID5B/EPS8/MSC/PMM1/EEF1E1/RNMT/RPS16/MAT2A/EXT1/SNX10/HNRNPU/NFYB/MYNN/BCLAF1/SPRY2/SOX17/B3GNT2/MTF2/PARP16/PFKP/SHMT1/KLF4/GFPT2/NRP2/SIRT1/SPRY4/PTP4A3/VEGFC/TFRC/SMARCA5/CTBP2/ICAM1/RARG/SYNGR1/SOCS3/HK2
SC	GOBP_POSITIVE_REGULATION_OF_ENDOCYTOSIS	97	0.415654	2.44326	0.00194175	0.00887008	ANXA2/CD36/GPC3/FLOT1/AP2M1/CLU/CD63/PPT1/CD14/SMPD1/TSG101/B2M/HNRNPK/PPP3CC/BIN1/RAB31/DAB2/C3/CBLL1/SFRP4/VPS28/DTNBP1/LRP1/WASL/AP2B1/AHI1/ATAD1/AXL/PPP3CA/APOE/SCYL2/ANGPT1/CD151/CLIP3/INSR/TREM2/CCL19/FMR1/NEDD4L/APPL2/CDC42/ANO6/SNCA/APPL1/SYK/CCL21/TOR1A/ARRB1/LDLRAP1
SC	GOBP_REGULATION_OF_CELL_MORPHOGENESIS_INVOLVED_IN_DIFFERENTIATION	95	0.429913	2.50691	0.00194175	0.00887008	CIB1/ITGB1BP1/CORO1C/RAC1/P4HB/ILK/S100A10/CRK/SS18L2/FERMT2/C1QBP/CAPRIN1/DAB2/ARPC2/ARHGEF7/MDK/DBN1/TESK1/DMTN/ABL1/NRP1/MYOC/ACTN4/KANK1/CALR/LIMS2/FLNA/PRKDC/FBLN1/PAFAH1B1/ACTR2/DBNL/CRKL/GBP1/CUL7/EFNA5/OBSL1/FBXO31/MYADM/SPRY4/CDC42/TRIOBP
SC	GOBP_REGULATION_OF_CARBOHYDRATE_BIOSYNTHETIC_PROCESS	97	0.43185	2.53846	0.00194175	0.00887008	RANBP2/LEP/DGAT2/FOXO1/PDK2/INPP5K/SORBS1/NFKB1/IGF1/CLTC/ACADM/PPP1CA/ARPP19/SDHAF3/FAM3C/NNMT/ADIPOQ/GPER1/PPP1CB/PGP/USP7/WDR5/OGT/PPP4R3B/CLK2/KAT2A/SESN2/FBP1/PLEK/AKT1/GPT/INSR/EPM2AIP1/IGF2/PTH1R/IRS2/SIRT1/LHCGR/CRY1/DYRK2/SNCA/PDGFB/PPP1R3C
SC	GOBP_NEGATIVE_REGULATION_OF_EXTRINSIC_APOPTOTIC_SIGNALING_PATHWAY	97	0.503528	2.95978	0.00194175	0.00887008	CTNNA1/GPX1/GSTP1/PEA15/PRDX2/NOL3/PHIP/PARK7/LMNA/IGF1/AR/STRADB/MAP2K5/RNF34/CTTN/LGALS3/HSPA1A/ZMYND11/TMBIM1/PSME3/SIAH2/NRP1/BCL2L1/RELA/THBS1/ITGAV/ZC3HC1/SFRP2/HMGB2/YAP1/TCF7L2/BCL2/ITGA6/RB1CC1/TGFBR1/BMP4/AKT1/RIPK1/MCL1/IFI6/BIRC6/HTT/HMOX1/SNAI2/ACVR1/SH3RF1/ARHGEF2/ITPRIP/FGF10/TNFAIP3/EYA2/FAIM/HSPA1B/ICAM1
SC	GOBP_NEGATIVE_REGULATION_OF_PROTEIN_MODIFICATION_BY_SMALL_PROTEIN_CONJUGATION_OR_REMOVAL	94	0.529807	3.08623	0.00194175	0.00887008	CAV1/UBXN1/SQSTM1/TRIP12/FYN/TSPO/SVBP/PARK7/COPS9/CAMLG/PPIA/RPS3/DNAJA1/GPS2/RPS7/RPS15/PLAA/ATG5/RPL11/RPL5/TRIM44/HSPA1A/VPS28/UFL1/SOX4/ABL1/CDK5/PINX1/ISG15/RPS20/RELA/OGT/HMG20B/BAG5/BUB3/IVNS1ABP/MAD2L2/N4BP1/SPRY2/AKT1/TRIM21/CHP1/RPL23/CTNNB1/PIAS3/RPL37/GTPBP4/CRY1/TTC36/HMG20A/TNFAIP3/U2AF2/HSPA1B/PARP10/PSEN1/ARRB1/CAPN3/DCUN1D3
SC	GOBP_NEGATIVE_REGULATION_OF_INTRINSIC_APOPTOTIC_SIGNALING_PATHWAY	97	0.634071	3.72713	0.00194175	0.00887008	TMBIM6/PARL/GPX1/VDAC2/NDUFA13/WFS1/PINK1/ENO1/PTTG1IP/TPT1/CREB3/HTRA2/CLU/TRIAP1/MIF/NOL3/XBP1/HSPB1/PARK7/NFE2L2/PPIA/TAF9/TXNDC12/DNAJA1/PPIF/GRINA/HERPUD1/CD44/CD74/RRN3/NDUFS3/CXCL12/URI1/ING2/USP47/NONO/SYVN1/HSPA1A/YBX3/KDM1A/BCL2L1/TAF9B/SFRP2/BCL2/TRAP1/BAG5/CDKN2D/TMEM161A/IVNS1ABP/TRIM32/AKT1/MCL1/NME5/PTPN1/SIRT1/SNAI2/BID/MMP9/ARHGEF2/BCL2L2/CCAR2/PLAUR/ACKR3/OPA1/HDAC1
SC	GOBP_PEPTIDYL_TYROSINE_DEPHOSPHORYLATION	100	0.312344	1.8421	0.00195695	0.00887008	PTPRA/PTP4A2/ACP1/MDP1/PTPMT1/PTPRF/DUSP23/PPP2CA/DUSP6/MTMR3/PTPRM/DUSP14/PTEN/TNS2/PGP/DUSP12/PTPN11/MTMR2/PTPN18/DUSP22/DUSP1/PTPN6/SSH3/DUSP4/PTPN21/PTPN1/PTPN23/PTPN13/PTP4A3/MTM1/CDKN3/PTPRC/MTMR6/CDC25B/PTPRN2/DUSP16/EYA2/DUSP3/PTPRS/CDC14B/DUSP2/PTPRE/PTPN4
SC	GOBP_REGULATION_OF_OXIDOREDUCTASE_ACTIVITY	100	0.37921	2.23646	0.00195695	0.00887008	PHB2/ATP2B4/CAV1/DDAH2/LEP/PARK7/AOC3/NDUFA4/CCS/NOSIP/NFKB1/CALM3/ECSIT/POR/ABL1/GNAI2/EGFR/GLA/H19/FDX2/NPR3/CYBA/COX17/APOE/FDX1/AKT1/OXA1L/SCARB1/GZMA/DDAH1/TACO1/SLAMF8/SIRT3/EDN1/RGN/ACVR2A/PDP1/AGT/SNCA/AGTR1/HTR2B/S100A1/RIPK3/NUS1/DHFR/NOD1/HM13/ZDHHC21
SC	GOBP_POSITIVE_REGULATION_OF_COLD_INDUCED_THERMOGENESIS	98	0.383527	2.25074	0.00195695	0.00887008	ADIPOR2/CD36/CAV1/GNAS/MFN2/ACSL1/FABP4/LEP/DECR1/PEMT/FH/EPAS1/FABP5/BSCL2/UCP2/G0S2/ADIPOR1/HDAC3/ADIPOQ/MFAP2/HADH/SCD/OXT/ADRB2/KDM1A/OGT/HSF1/CEBPB/THRA/ELOVL3/PRKAB2/GADD45G/CXCR4/PDGFC/ALPL/CMKLR1/TRPV2/STAT6/APPL2/GJA1/ZBTB7B/SIRT6/SYK
SC	GOBP_REGULATION_OF_DOUBLE_STRAND_BREAK_REPAIR	100	0.406824	2.39932	0.00195695	0.00887008	MORF4L1/MORF4L2/MAGEF1/TRIP12/MGMT/TERF2IP/ACTB/MEAF6/PARP3/RPA2/NUDT16L1/UBE2N/KAT5/VPS72/DEK/PARP1/TWIST1/WDR48/DMAP1/KMT5B/KDM1A/TFIP11/SPIDR/PPP4C/PPP4R3B/PRKDC/HSF1/UBE2V2/MRGBP/ACTR2/ZCWPW1/MAD2L2/PNKP/RBBP8/MMS19/YEATS4/SETMAR/ACTL6A/ING3/SLF1/RUVBL2/SETD2/EPC2/SPIRE1/SIRT6/WRAP53/TP53BP1/SMCHD1
SC	GOBP_BIOLOGICAL_PROCESS_INVOLVED_IN_INTERACTION_WITH_SYMBIONT	100	0.406829	2.39934	0.00195695	0.00887008	GPX1/PHB/HSPA8/TUSC2/SNW1/HSPD1/PSMC3/VAPA/CAV2/INPP5K/SAP30BP/GAPDH/ROMO1/PPIB/CFL1/IFI27/PC/RAB9A/NUCKS1/TAF11/STOM/CSF1R/REST/CDK9/ZBED1/TARDBP/CCNK/EIF2AK4/SP1/FN1/CTSG/APOE/RRP1B/CCL3/CCL4/MYD88/FMR1/JUN/ZNF502/CCNT1/CHD1/JAK2/CCL8/ELANE/HDAC1
SC	GOBP_ARTERY_DEVELOPMENT	100	0.426143	2.51325	0.00195695	0.00887008	RBPJ/SNX17/COL3A1/EFEMP2/LEP/HECTD1/MDK/CITED2/ENG/PDGFRB/SOX4/LOX/LRP1/NRP1/LUZP1/ZMIZ1/ADGRF5/PDE2A/SIX1/PRRX1/AP2B1/PLXND1/TGFBR1/APLNR/PKD2/APOE/BMP4/EDNRA/LOXL1/SEC24B/NPRL3/ACVRL1/CNTRL/HEY1/HES1/NOTCH1/WNT11/EFNB2/GJA5/EDN1/HPGD/NOTCH3/SRF/BMPR2/JAG1
SC	GOBP_NUCLEOTIDE_PHOSPHORYLATION	98	0.431328	2.53127	0.00195695	0.00887008	NME4/ENO1/EIF6/GPD1/PGK1/ALDOA/PGM1/NME2/TPI1/NME3/PFKFB1/NME1/LDHA/GAPDH/NUPR1/JMJD8/IGF1/ALDOC/TREX1/ARL2/ZBTB20/BPGM/PGAM1/PKM/CMPK1/PRKAG1/AK1/HK1/DDIT4/AK4/MLXIPL/OGT/OGDH/DTYMK/GALK1/PFKL/APP/FBP1/PGAM2/ZBTB7A/PNKP/INSR/GPI/NME5/PFKP/STAT3/GIT1
SC	GOBP_HISTONE_DEACETYLATION	98	0.441187	2.58912	0.00195695	0.00887008	MORF4L1/C6orf89/PHB/PINK1/MORF4L2/KDM5A/SAP30BP/ING2/BRMS1/BCL6/NIPBL/MBD2/REST/CTBP1/SFPQ/WDR5/KAT14/MIER1/SGF29/HDAC7/KAT2A/RBM14/MBIP/APLNR/TBL1XR1/PER1/CAMK2D/MSL3/HDAC11/HDAC5/RCOR3/SREBF1/SIRT3/SIRT1/SKI/AKAP8L/PRKD1/ZBTB7B/RRP8/CHD3/SIRT6/SUV39H1/CHD4/MIER3/HDAC1/SMARCAD1/PRKD2/ZNF541/RBBP7
SC	GOBP_APOPTOTIC_MITOCHONDRIAL_CHANGES	98	0.547375	3.21229	0.00195695	0.00887008	PARL/GPX1/GHITM/PDCD5/VDAC2/MFF/PINK1/AIFM2/BOK/HSPD1/BNIP3L/FIS1/ACAA2/SLC25A5/CLU/TRIAP1/MUL1/TMEM14A/NOL3/VPS35/PRELID1/GGCT/BAD/FAM162A/PSMD10/LMNA/ATG3/PPIF/IGF1/SLC25A4/HSPA1A/PYCARD/BNIP3/GPER1/RHOT2/CIDEB/BCL2L1/CHCHD10/TNFSF10/PPP2CB/NMT1/IFIT2/BCL2/AVP/MOAP1/AKT1/IFI6/RHOT1/DNM1L/ATF2/BLOC1S2/BID/MMP9/GZMB/BCL2L2/CCAR2/EYA2/ZNF205/PLAUR/HK2/SLC35F6/OPA1
SC	GOBP_CELL_SUBSTRATE_JUNCTION_ORGANIZATION	98	0.556611	3.26649	0.00195695	0.00887008	LIMCH1/ITGB1BP1/LAMC1/POLDIP2/PTPRA/CORO1C/RHOA/LAMTOR2/RAC1/IQSEC1/TRIP6/APOD/S100A10/SORBS1/FERMT2/ACTN1/ACTG1/ARHGEF7/VCL/ARF6/RHOD/CTTN/SMAD3/MAP4K4/SFRP1/PTEN/TLN1/SLK/THY1/DMTN/DLC1/ABL1/NRP1/MYOC/THBS1/RAB8B/ROCK1/FN1/BCL2/ITGA6/PIK3R1/ITGA5/DUSP22/DST/ROCK2/GPM6B/MACF1/PLEC/ACVRL1/EFNA5/FAM107A/TEK/KDR/LDB1/MAPRE2/DAPK3/PHLDB2/SDC4/BCR/COL16A1/CORO2B
SC	GOBP_VIRAL_GENE_EXPRESSION	98	0.564308	3.31166	0.00195695	0.00887008	EIF3L/LARP7/EIF3A/CSDE1/SNW1/EIF3D/PSMC3/SSB/EIF3F/INPP5K/PCBP2/IFITM3/MGAT1/EIF3B/ATG5/MDFIC/GALNT1/NUCKS1/EIF3G/CSNK1A1/CANX/TAF11/EDEM2/RSF1/REST/PTBP1/CDK9/ATG12/DHX9/HEXIM1/GTF2B/TARDBP/EIF2AK4/USF2/SP1/FURIN/SPCS3/MGAT4B/TRIM32/MID2/PRMT1/ST3GAL1/TRIM21/TRIM27/SPCS1/PARP16/RRP1B/CCL3/MGAT5/CCL4/JUN/ST6GALNAC2/ST6GALNAC4/ST3GAL4/MAN2A1/CCNT1/ZFP36/CHD1/CCNT2/UBP1/PARP10/TRIM13
SC	GOBP_PROTEIN_TARGETING_TO_MITOCHONDRION	98	0.686607	4.02938	0.00195695	0.00887008	UBE2L3/PARL/PDCD5/NDUFA13/BCAP31/HAX1/MFF/TIMM13/SH3GLB1/HSP90AA1/PINK1/UBE2D3/TOMM5/TIMM23/TOMM20/HSPD1/BNIP3L/MFN2/GRPEL1/FIS1/TOMM22/HTRA2/TIMM9/AIP/DNAJC15/TSPO/TOMM70/DNAJC19/CHCHD4/SAE1/PAM16/TIMM22/UBE2J2/PITRM1/UBL5/ROMO1/FBXO7/IMMP2L/TIMM8B/TIMM10/TOMM7/TIMM10B/TOMM34/LMAN1/HUWE1/SAMM50/HSPA4/MTERF4/BAG3/BAG4/BAP1/ABLIM3/PMPCB/FZD5/FBXW7/LEPROT/RHOU/SREBF2/MIPEP/USP36/RAC2/TIMM17B/DNLZ/A…
SC	GOBP_REGULATION_OF_ORGAN_GROWTH	96	0.301117	1.7582	0.00196078	0.00887008	SERP1/SOD1/RBPJ/YY1/TOMM70/RBP4/IGF1/TGFBR2/TGFBR3/DUSP6/PTEN/LATS2/CITED2/SAV1/MAPK14/YBX3/YAP1/TGFBR1/PARP2/AKT1/MEF2C/PIM1/PI16/RGS2/NOTCH1/IGF2/BASP1/EDN1/ACACB/SASH3/HLX/WWC2/G6PD/FGF2
SC	GOBP_COLLAGEN_METABOLIC_PROCESS	96	0.333548	1.94757	0.00196078	0.00887008	ITGB1/VIM/MMP28/CST3/COL1A2/LARP6/MFAP4/CTSK/MMP2/PEPD/ADAMTS2/ENG/PDGFRB/CTSB/VIPAS39/TNS2/SERPINH1/RCN3/CTSL/COL5A1/CYGB/SUCO/TNXB/FURIN/RGCC/ADAM15/COL1A1/BMP4/MMP19/EMILIN1/ERRFI1/TRAM2/MRC2
SC	GOBP_REGULATION_OF_ACTOMYOSIN_STRUCTURE_ORGANIZATION	96	0.463813	2.70818	0.00196078	0.00887008	LIMCH1/ITGB1BP1/RHOA/WASF2/RAC1/PFN1/MKKS/RHOC/S100A10/INPP5K/FERMT2/ACTG1/PFN2/SMAD3/SFRP1/TESK1/DLC1/ABL1/BBS4/TJP1/NRP1/MYOC/BAG4/SORBS3/LPAR1/ROCK1/PXN/PPFIA1/TGFBR1/RGCC/S1PR1/PAK1/PIK3R1/ROCK2/RAPGEF3/ARHGEF15/FHOD1/MTOR/EVL/CD47/WNT11/EDN1/PTGER4/CDC42/PHLDB2/SDC4/TPM1/CORO2B/ARHGEF10L/AKAP13/ARAP1/STMN1
SC	GOBP_REGULATION_OF_SIGNAL_TRANSDUCTION_BY_P53_CLASS_MEDIATOR	96	0.488794	2.85404	0.00196078	0.00887008	UBB/PTTG1IP/TRIAP1/MIF/DDX5/COPS3/PSMD10/TAF9/HNRNPK/PAK1IP1/SMYD2/ING4/CD44/RPS7/RPS15/CD74/RPL11/RRN3/ING2/RNF34/RPL5/EEF1E1/TWIST1/PRMT5/SETD9/SOX4/HIPK2/USP7/CDK5RAP3/KDM1A/RPL26/HEXIM1/RPS20/TAF9B/RPF2/EIF5A/BCL2/BOP1/AKT1/NUAK1/RPL23/SPRED2/MTOR/MLF1/RPL37/MSX1/SIRT1/TP53RK/SNAI2/RRS1/MYC/SGK1/DYRK2
SC	GOBP_REGULATION_OF_CYCLIN_DEPENDENT_PROTEIN_KINASE_ACTIVITY	96	0.497501	2.90488	0.00196078	0.00887008	HSP90AB1/CDKN1C/BCCIP/CKS1B/CDKN2B/CDKN2C/CCNI/ACTB/PSMD10/CCND1/CNPPD1/FBXO7/CCND2/CEBPA/MNAT1/CCND3/CCNG1/PTEN/CDC37/LATS2/EGFR/HEXIM2/CDK5RAP3/NR2F2/HEXIM1/CCNK/CCNH/GADD45A/CDKN2D/GTF2H1/PKD2/RGCC/CCNB1/AKT1/CDK5RAP2/IPO5/CDKN1B/CCNY/CCNL1/CDKN1A/CKS2/STOX1/GTPBP4/CASP3/CDK7/CDKN3/SERTAD1/CCNT1/CCNT2/PDGFB/MEN1/TNFAIP3/CDK5RAP1/MAPRE3
SC	GOBP_SPERM_MOTILITY	112	-0.321889	-1.69115	0.0019685	0.00887008	INPP5B/SLC26A8/SPEF2/CATSPER2/ATP1A4/KLC3/CCR6/SLC9B1/CCDC40/EPPIN/CFAP69/CFAP52/CFAP157/TCTE1/TTLL9/PRDM14/CFAP206/CFAP65/DRC7/PRSS55/IQCF1/SORD/DZIP1/IQCG/CELF3/DNAH11/DNAH5/EFCAB1/NEURL1/SLC22A14/TAC4/TEKT2/CATSPERD/ROPN1/NPHP4/ENO4/CATSPER4/QRICH2/TEX101/DNAI1/TBC1D21/CACNA1I/PLA2G3/ARMC12/CCDC39/DDX4/TPPP2/PGAM4/DNAH1/TTLL8/SLC22A16/SPEM1/CFAP43/RNASE10/ROPN1B/CFAP45/TSSK4/CATSPER1/SMCP/GAPD…
SC	GOBP_NEGATIVE_REGULATION_OF_HEMOPOIESIS	103	0.328685	1.9577	0.0019685	0.00887008	HMGB1/PRDX2/ANXA1/HOXA7/MAFB/FBXO7/TMEM176B/FSTL3/CD74/TCTA/FBN1/TMEM176A/SFRP1/BCL6/MDK/ADIPOQ/C1QC/FGL2/TOB2/GPR137B/FBXW7/PIK3R1/ID2/BMP4/TMEM178A/TRIB1/IL17D/HSPA9/CCL3/CTNNB1/TNFAIP6/PIAS3/RC3H1/TLR4/MYC/HLX/SOCS1/ZBTB7B/RARA/CDK6/CUL4A/LILRB4/FCGR2B/LRRC17
SC	GOBP_CARDIAC_SEPTUM_DEVELOPMENT	103	0.348213	2.07401	0.0019685	0.00887008	RBPJ/DHRS3/SNX17/CRELD1/PARVA/HECTD1/TGFBR2/TGFBR3/SLIT3/CITED2/ENG/SOX4/SAV1/LMO4/NRP1/LUZP1/PDE2A/SEMA3C/AP2B1/PLXND1/HEG1/TGFBR1/APLNR/BMP4/MAML1/MKS1/NPRL3/CNTRL/HEY1/HES1/NOTCH1/WNT11/GJA5/NRP2/SLIT2/FGFRL1/ACVR1/NOTCH2/ANK2/HEYL/BMPR2/JAG1/FRS2/TRIP11/GATA6/ZBTB14/NDST1
SC	GOBP_MACROPHAGE_ACTIVATION	103	0.356023	2.12052	0.0019685	0.00887008	HSPD1/CLU/IFNGR2/NR1H3/MIF/TNIP2/AIF1/CD74/TREX1/GRN/C1QA/CEBPA/VSIG4/NMI/TYROBP/ADGRF5/IFNGR1/THBS1/IFI35/CD93/PJA2/GPR137B/CRTC3/LBP/APP/CST7/JUND/ITGB2/CCL3/TREM2/TICAM1/NR1D1/JUN/CD200/TLR4/PTPRC/SNCA/SYK/IL33/SUCNR1/JAK2/ITGAM/PLA2G4A/AGER/FCGR2B
SC	GOBP_NEGATIVE_REGULATION_OF_LIPID_METABOLIC_PROCESS	102	0.366484	2.17323	0.0019685	0.00887008	SOD1/AKR1C3/ACADVL/PPP2R5A/ORMDL1/ADRA2A/ORMDL2/DGAT2/APOD/CCDC3/HCAR2/NFKB1/INSIG1/BSCL2/PIK3IP1/CIDEA/ORMDL3/PIP4K2B/REST/GPER1/ERLIN1/PIP4K2A/CRTC3/APOE/SCAP/FBXW7/APOC1/AKT1/PDE3B/ATP1A1/FMC1/BMP2/SIRT1/APPL2/ACACB/SNAI2/PIBF1/PDGFB/ERLIN2
SC	GOBP_NEUTROPHIL_CHEMOTAXIS	102	0.383761	2.27568	0.0019685	0.00887008	RAC1/BSG/CKLF/SRP54/PPIA/C1QBP/PPIB/CD74/MPP1/LGALS3/MDK/C3AR1/SAA1/CCL13/THBS4/GBF1/CCL14/JAM3/LBP/CCL18/FCER1G/ITGB2/BST1/RAC2/CCL3/CCL4/DNM1L/TNFAIP6/S100A9/CCL19/EDN1/CXCL10/SLIT2/CCL2/MIR223/SYK/S100A8/CCL21/PPBP/CCL23/CCL8/ITGA1/PIP5K1C/DPP4/MCU/CXCL2/CXCL9/PREX1/S100A12/CCL26/PIKFYVE/CXCL1/JAML/PDE4B/CXCL11
SC	GOBP_POSITIVE_REGULATION_OF_ENDOTHELIAL_CELL_PROLIFERATION	103	0.397598	2.36815	0.0019685	0.00887008	HMGB1/VEGFB/STAT5A/ANG/CAV2/MYDGF/FGFR1/CXCL12/MDK/ECM1/PDCL3/PDCD6/NRP1/ZNF580/EGFL7/TNFSF12/CYBA/THBS4/AGGF1/HMGB2/SP1/TGFBR1/APLNR/VEGFD/BMP4/AKT1/ACVRL1/BMP6/TEK/KDR/IGF2/BMP2/STAT3/JUN/NRP2/SIRT1/HMOX1/VEGFC/PRKD1/SIRT6/PDGFB/FGF2/BMPR2/AGTR1/HTR2B
SC	GOBP_TUMOR_NECROSIS_FACTOR_MEDIATED_SIGNALING_PATHWAY	103	0.398183	2.37163	0.0019685	0.00887008	RRAGA/GSTP1/TXNDC17/COMMD7/ILK/NOL3/STAT1/CPNE1/CCDC3/TMSB4X/CASP1/GPS2/TRADD/SHARPIN/UBE2K/BIRC2/CARD16/HSPA1A/CASP4/PYCARD/GAS6/ADIPOQ/ACTN4/TNFRSF1A/EXT1/FOXO3/LAPTM5/RELA/TNFRSF14/EIF5A/PPP2CB/NFKBIA/TNFSF13B/PLVAP/PIAS4/TRIM32/TNFRSF4/RIPK1/HIPK1/TNFRSF1B/PIAS3/BIRC3/NKIRAS1/SYK/TNFAIP3/HSPA1B/JAK2/CDIP1/TRAF2/TNFRSF18/SPPL2B/LIMS1
SC	GOBP_ANTIGEN_PROCESSING_AND_PRESENTATION	102	0.53738	3.18663	0.0019685	0.00887008	RFTN1/RAB4A/RAB10/PSME1/CTSF/PDIA3/HLA-DRA/HLA-DRB1/PSMB8/HLA-E/YTHDF1/HLA-DMA/B2M/HLA-DPA1/HLA-A/HLA-DPB1/HLA-B/RAB34/RAB6A/RAB32/CD74/ATG5/TAPBPL/TREX1/HLA-C/ARL8B/AP3D1/PYCARD/HLA-DQB1/CTSD/HLA-DMB/GBA/CTSL/CTSH/CALR/EXT1/FGL2/HLA-F/THBS1/AP3B1/RAB8B/HLA-DRB5/CD68/AZGP1/FCER1G/LNPEP/ERAP1/IFI30/HLA-DQA1/CLEC4A/TREM2/CCL19/MFSD6/CD1C/RAB35/HLA-DQA2/ICAM1/CCL21/NOD1/FCGR2B/LILRB2/LGMN/TAPBP/CTSS
SC	GOBP_REGULATION_OF_PROTEIN_LOCALIZATION_TO_PLASMA_MEMBRANE	102	0.546844	3.24275	0.0019685	0.00887008	CIB1/KIF5B/PGRMC1/ITGB1/ATP2B4/VTI1B/PPP2R5A/MRAP/RER1/SQSTM1/RHOQ/AP2M1/RANGRF/VPS4A/GOPC/SPTBN1/ACTB/RACK1/TMEM59/SORBS1/CLTC/DAB2/AR/HECTD1/RHOG/VAMP8/PID1/ARF6/PICALM/LGALS3/ZDHHC7/TMBIM1/ACSL3/EGFR/GPER1/CDK5/LRP1/BCL2L1/PKDCC/RAMP3/EZR/ZDHHC5/PPFIA1/CNST/ZDHHC2/ATP2C1/PIK3R1/STX8/AKT1/GBP1/CLIP3/PRNP/ABI3/STX7/STX4/TREM2/CSK
SC	GOBP_ERAD_PATHWAY	103	0.547591	3.26153	0.0019685	0.00887008	VCP/HSP90B1/SEC61B/BCAP31/WFS1/CAV1/OS9/DNAJB12/UBXN1/HSPA5/RNF185/RHBDD2/AUP1/UBE2J1/NFE2L2/UBXN6/RNF5/STUB1/UBXN4/UBE2J2/DERL1/ERLEC1/DERL2/HERPUD1/RNF139/BAG6/SYVN1/TMEM259/GET4/SDF2L1/CANX/UBQLN2/EDEM2/FBXO17/RCN3/DNAJB9/UBQLN1/FAF2/TMUB1/CALR/UBE4A/CCDC47/TMEM129/ERLIN1/SEL1L/DNAJB2/FAM8A1/SGTA/AQP11/USP14/MAN1A1/UBE2G2/RHBDD1/EDEM3/UBAC2/STT3B/SEL1L2/ERLIN2/TRIM13/TOR1A/USP19/AMFR/PSMC6/USP…
SC	GOBP_REGULATION_OF_MRNA_SPLICING_VIA_SPLICEOSOME	103	0.601741	3.58406	0.0019685	0.00887008	PRDX6/LARP7/HSPA8/SAP18/SNW1/CIRBP/SRPK2/RBFOX2/THRAP3/DDX5/SF1/CELF2/SRSF3/RBM42/HNRNPK/PUF60/SRSF7/SRSF2/RBM15B/DDX17/C1QBP/SRSF9/CELF1/NCL/YTHDC1/WTAP/KHDRBS1/FXR1/CWC22/RBM25/SRSF10/SON/RBM4/HNRNPA1/REST/PTBP1/MBNL1/RBM3/RBM39/SRSF6/RBM10/SNRNP70/SRPK1/MAGOH/RBM8A/KHDRBS3/HNRNPU/TRA2B/NOVA1/FAM172A/SF3B4/MBNL2/HNRNPA2B1/ZBTB7A/PCBP4/QKI/TRA2A/RBM5/SRSF4/SRRM1/RBMX/TIA1/RNPS1/HNRNPL/FMR1/SFSWA…
SC	GOBP_TRIGLYCERIDE_METABOLIC_PROCESS	99	0.341149	2.00659	0.0019802	0.00887008	GPX1/CAV1/THRSP/LPL/ACSL1/NR1H3/DGAT1/DGAT2/GPAM/CAT/PNPLA2/INSIG1/MGLL/CTDNEP1/C3/PNPLA4/PTPN11/GPIHBP1/LIPE/NR1H2/TNXB/SEL1L/ABHD5/PCK1/APOE/FBXW7/PCK2/APOC1/LPIN2/TBL1XR1/AADAC/MBOAT7/SCARB1/LMF1/SREBF1/LPGAT1/RGN/SIRT1
SC	GOBP_REGULATION_OF_BMP_SIGNALING_PATHWAY	99	0.369409	2.17281	0.0019802	0.00887008	RBPJ/HTRA1/FSTL1/UBE2D3/GPC3/PELO/ILK/FBXL15/FSTL3/CHRDL1/FBN1/SFRP1/TRIM33/SFRP4/ENG/FST/NBL1/ABL1/UBE2D1/HTRA3/PPARG/HIPK2/CDH5/PPM1A/BAMBI/SFRP2/RBPMS2/TOB1/BMP4/CRIM1/FKBP8/SMURF1/ACVRL1/LEMD2/HES1/NOTCH1/KDR/NUMA1/ZNF423/TNFAIP6/MSX1/SKI/SULF1/NOTCH2/BMPR2
SC	GOBP_POSITIVE_REGULATION_OF_MYELOID_CELL_DIFFERENTIATION	99	0.402282	2.36617	0.0019802	0.00887008	MTURN/HAX1/SMAP1/PITHD1/STAT1/HLA-DRB1/CTNNBIP1/CD74/FAM210B/HSPA1A/ZFP36L1/RAB7B/MAPK14/FADD/ISG15/TYROBP/KLF10/FOXO3/PRKDC/HMGB2/HOXA5/HSF1/STAT5B/HCLS1/CD4/FES/ID2/RIPK1/TRIB1/CSF1/PRMT1/TMEM64/RB1/EVI2B/TREM2/STAT3/ACVR2A/CCR1/ACIN1/NOTCH2/FOS/SLC9B2/JAG1/HSPA1B/KITLG
SC	GOBP_REGULATION_OF_EPITHELIAL_TO_MESENCHYMAL_TRANSITION	99	0.427913	2.51693	0.0019802	0.00887008	SDHAF2/GLIPR2/FERMT2/PPP2CA/DAB2/TGFBR2/ADIPOR1/SDCBP/SMAD3/SFRP1/PTEN/TWIST1/MDK/ENG/EFNA1/LOXL2/MCRIP1/WWTR1/BAMBI/SPRY1/SFRP2/TCF7L2/MARK1/TGFBR1/RGCC/MAD2L2/COL1A1/PHLDB1/BMP4/OLFM1/SPRY2/VASN/TGFB1I1/NOTCH1/SPRED2/CTNNB1/MTOR/BMP2/DAG1/ZNF703/PHLDB2/ACVR1/JAG1/FUZ
SC	GOBP_LIPOPROTEIN_BIOSYNTHETIC_PROCESS	99	0.445139	2.61825	0.0019802	0.00887008	DBI/DPM3/ZDHHC3/GPAA1/GOLGA7/PIGF/ATG5/ZDHHC12/PIGC/WDR45B/ZDHHC4/PIGZ/GLUL/DPM2/ZDHHC6/ZDHHC7/PIGU/ZDHHC16/DPM1/ATG101/WIPI2/PIGV/GBA/ZDHHC9/ATG12/PPM1A/ATG7/PIGK/PIGS/NMT1/ZDHHC5/RB1CC1/ZDHHC2/APOE/ZDHHC1/ZDHHC18/CLIP3/WIPI1/PGAP2/RABL3/RAB3GAP1/PGAP3/ABCA1/ATG13/PPM1B/PORCN/ZDHHC8/WDR45/MPPE1/PIGM/UGCG/LCAT/ULK1/RAB3GAP2
SC	GOBP_INTRINSIC_APOPTOTIC_SIGNALING_PATHWAY_IN_RESPONSE_TO_DNA_DAMAGE	99	0.554319	3.26043	0.0019802	0.00887008	BOK/SNW1/TPT1/HTRA2/CLU/TRIAP1/MIF/TMEM109/BAD/TAF9/PHLDA3/RPS3/HNRNPK/NUPR1/SHISA5/CD44/CD74/CXCL12/ING2/USP47/BAG6/PYCARD/ABL1/CRIP1/HIPK2/CIDEB/TNFRSF1A/DDIT4/KDM1A/TOPORS/BCL2L1/RPL26/IFI16/TAF9B/PRKDC/SFRP2/FNIP2/MLH1/BCL2/CDKN2D/MOAP1/PIAS4/TMEM161A/TRIM32/PIK3R1/MCL1/HIPK1/BCL2A1/NACC2/TNFRSF1B/CDKN1A/SIRT1/BCL3/HMOX1/SNAI2/BID/DYRK2/BCL2L2/CCAR2/RPS27L/ACKR3/CDIP1
SC	GOBP_MITOCHONDRIAL_GENE_EXPRESSION	99	0.569067	3.34718	0.0019802	0.00887008	MRPL47/MALSU1/MRPS14/MRPL2/MRPS18A/MTIF3/MRPS24/MRPS21/TUFM/HSD17B10/MRPL51/COA3/MRPS2/MRPL16/MRPL58/MRPS34/UQCC2/RCC1L/TRMT10C/C1QBP/MRPS12/MRPS16/MRPS18B/MRPS6/FASTK/MRPS15/MTERF2/MTG1/MRPL23/MTERF4/MRPS11/MTRF1L/MRPL12/IARS2/ELAC2/TRMT61B/MRPL57/WARS2/MRPS7/FOXO3/MPV17L2/CHCHD10/MRPS28/SHMT2/FASTKD5/RARS2/NOA1/TSFM/NGRN/NDUFA7/LRPPRC/ALKBH1/MRPS27/TACO1/TFB2M/SARS2/RPUSD3/TBRG4/GATB/CDK5RAP1/M…
SC	GOBP_POSITIVE_REGULATION_OF_LYMPHOCYTE_DIFFERENTIATION	105	0.317034	1.89651	0.00200401	0.00887008	XRCC6/RHOA/PPP2R3C/ANXA1/HLA-DRA/XBP1/BAD/HLA-DRB1/CD74/TGFBR2/AP3D1/BCL6/GAS6/MDK/SOX4/ZMIZ1/FOXO3/ADA/AP3B1/PRKDC/CD83/STAT5B/ZBTB16/AXL/PCK1/PCID2/RIPK2/IL15RA/ZBTB1/CCL19/SART1/CD86/SASH3/PTPRC/LGALS9/HLX/SOCS1/ZBTB7B/RARA/SYK/NFKBIZ/LILRB4/PNP/MMP14/LILRB2/IL4I1
SC	GOBP_MUSCLE_ADAPTATION	105	0.356693	2.13375	0.00200401	0.00887008	ATP2B4/MTPN/YY1/NOL3/TOMM70/GSN/FOXO1/LMNA/AIF1/IGF1/SMAD3/PARP1/IGFBP5/MYOC/PPARG/CDK9/CYBA/TNFRSF1A/FOXO3/LMCD1/ROCK1/TWF1/IL6ST/PPP3CA/PARP2/MEF2A/GLRX3/ROCK2/PI16/CAMK2D/CAMTA2/RGS2/NOTCH1/ERRFI1/TNFRSF1B/DAG1/BECN1/EDN1/HMOX1/AGT/G6PD/KLF15
SC	GOBP_PRIMARY_ALCOHOL_METABOLIC_PROCESS	104	0.370172	2.20698	0.00200401	0.00887008	AKR1C3/DHRS3/GDE1/ACSS2/GPD1/AKR1C2/ADH1B/AKR1C1/RBP4/RDH5/ADH5/DGAT1/PARK7/DGAT2/AKR7A2/DHRS4/ALDH1A1/PNPLA2/IGF1/DAB2/EDNRB/RETSAT/ALDH2/THTPA/ADH1C/REST/PNPLA4/SULT1A4/ADH1A/LIPE/DHRS7/ALDH3A2/AKR1A1/SULT1A2/RDH11/RDH14/ALDH1A3/BMP6/CYP1B1/BMP2/H6PD
SC	GOBP_CHONDROCYTE_DIFFERENTIATION	104	0.39184	2.33616	0.00200401	0.00887008	EFEMP1/NFIB/COL3A1/TGFBR2/ADAMTS12/SMAD3/ANXA6/MDK/ECM1/POR/TSKU/GLG1/TGFBI/MAPK14/OSR2/SERPINH1/PTPN11/LOXL2/EXT1/ZNF219/SFRP2/PKDCC/ZBTB16/TGFBR1/MAF/SNX19/BMP4/MEF2C/SULF2/CHADL/ACVRL1/CREB3L2/BMP6/RB1/CTNNB1/BMP2/ARID5A/PTH1R/LNPK/ATF2/LTBP3/MEF2D/MUSTN1/SNAI2/SULF1/BMPR2/CYTL1/RARG
SC	GOBP_INTEGRIN_MEDIATED_SIGNALING_PATHWAY	105	0.401578	2.40225	0.00200401	0.00887008	CTNNA1/ITGB5/ITGB1BP1/ITGB1/PTPRA/NME2/CD63/COL3A1/ILK/MYH9/FERMT2/ITGA7/DAB2/ITGAE/TLN1/PLPP3/THY1/DMTN/ABL1/NRP1/ZYX/TIMP1/PTPN11/ISG15/LIMS2/FLNA/ITGAV/FBLN1/FN1/ITGA6/CCM2/ADAM15/ITGA5/PLEK/FERMT3/CUL3/DST/ITGB2/BST1/CD47/FGR/CDC42/ERBIN/COL16A1/PRKD1/BCAR1/SYK/ADAM9/ITGBL1/DOCK1/ITGAM/NEDD9/ITGA1/HCK/LIMS1
SC	GOBP_POLYSACCHARIDE_METABOLIC_PROCESS	105	0.413879	2.47584	0.00200401	0.00887008	UGP2/GYG2/PTGES3/PYGL/GBE1/STBD1/PYGB/B4GAT1/INPP5K/SORBS1/NFKB1/IGF1/CLTC/ACADM/PPP1CA/STK40/PPP1R1A/POMC/PPP1CB/EXT1/GAA/GYS1/AGL/PHLDA2/RB1CC1/IL6ST/PPP1CC/AKT1/PCDH12/INSR/B3GNT2/EPM2AIP1/PHKB/KHK/IGF2/GYG1/IRS2/NR1D1/CHST7/B4GALT5/PHKA2/PPP1R2/HS2ST1/DYRK2/B3GNT9/NDST2/PDGFB/PPP1R3C
SC	GOBP_ORGANELLE_MEMBRANE_FUSION	104	0.42641	2.54227	0.00200401	0.00887008	CHMP3/VAMP3/ANXA2/VTI1B/RAB7A/SNAPIN/VPS4A/ANXA1/CAV2/CHMP2B/RCC1L/RAB34/STX12/RAB20/STX10/VPS39/VAMP8/ARL8B/EEA1/USO1/VAMP7/STX16/PIP4K2B/RAB7B/VAMP4/STX6/YIPF5/RAB13/BNIP1/RAB8B/STX5/PIP4K2A/CORO1A/STXBP1/TBC1D4/STX8/UVRAG/TMEM175/STX7/STX4/GOSR2/VAMP2/SAMD9/SNAP23/SNAP47/RAB8A/VPS41/SNCA
SC	GOBP_NUCLEOSOME_ORGANIZATION	104	0.432619	2.57929	0.00200401	0.00887008	ANP32B/YY1/PAF1/NAP1L4/MCRS1/ATRX/DAXX/NPM1/CENPW/TFPT/POLE3/UCHL5/MIS18A/DNAJC9/VPS72/SART3/BAZ1A/ASF1A/ZNHIT1/RSF1/SMARCD2/NAP1L1/ACTR8/SMARCE1/ANP32E/DMAP1/SSRP1/HMGB2/SMYD3/TSPYL1/SMARCC1/BRD2/BPTF/SET/ITGB3BP/TSPYL4/NAP1L5/TSPYL2/SMARCD3/ACTL6A/RUVBL2/MCM3AP/SETD2/SMARCA5/ACTR5/CHAF1A/TSPYL5/SMARCC2/NFRKB
SC	GOBP_RESPONSE_TO_HEAT	105	0.448363	2.68212	0.00200401	0.00887008	VCP/SOD1/HSP90AB1/HSP90AA1/HTRA2/SUMO1/YWHAE/DNAJB1/EIF2S1/CD14/HIKESHI/DAXX/SLU7/STUB1/DNAJA1/EIF2B1/IGF1/EIF2B3/HSBP1/CXCL12/HSPA1A/EIF2B5/BAG3/ZFAND1/PDCD6/HSBP1L1/DNAJB6/IGFBP7/CD34/THBS1/DNAJA2/FGF1/SCARA5/TPR/HSF1/IRAK1/MAPKAPK2/AKT1/EIF2B2/EIF2B4/PRKACA/IER5/HSPA6/MTOR/TRPV2/TP53INP1/DNAJA4/SIRT1/CXCL10/HMOX1
SC	GOBP_PYRUVATE_METABOLIC_PROCESS	105	0.455137	2.72265	0.00200401	0.00887008	LDHB/ENO1/EIF6/GPD1/PGK1/ME3/PDHA1/ALDOA/PGM1/TPI1/PFKFB1/MPC2/PDK2/ME1/LDHA/GAPDH/NUPR1/VDAC1/JMJD8/IGF1/ALDOC/PC/TREX1/DLD/ARL2/ZBTB20/BPGM/SRR/PGAM1/PKM/PRKAG1/HK1/DDIT4/MLXIPL/OGT/OGDH/PCK1/GALK1/PDK4/PFKL/PCK2/APP/FBP1/PGAM2/ZBTB7A/INSR/GPI/PFKP/STAT3/GIT1/PDHB/DLAT/ADPGK
SC	GOBP_POSITIVE_REGULATION_OF_UBIQUITIN_DEPENDENT_PROTEIN_CATABOLIC_PROCESS	105	0.478073	2.85984	0.00200401	0.00887008	VCP/BCAP31/CAV1/GABARAP/RBX1/MAGEF1/CLU/SUMO1/DDRGK1/RACK1/PSMD10/NFE2L2/STUB1/ZFAND2A/HSPBP1/HERPUD1/DAB2/KEAP1/HECTD1/CEBPA/RNF139/HSPA1A/CSNK1A1/PTEN/MKRN2/UBQLN2/PIAS1/SUMO2/CCDC22/GBA/UBQLN1/CDK5RAP3/TRIB2/LAPTM5/BBS7/USP5/ZER1/DNAJB2/FBXW7/CSNK1E/SGTA/RNF19A/AKT1/DVL1/ANKIB1/TRIB1/RAD23A/RCHY1/SMURF1/RNF180/SH3RF1/NUB1/RNF19B/SIRT6/AGTPBP1/HSPA1B/RNF144B/PSEN1/RNF14
SC	GOBP_STRESS_FIBER_ASSEMBLY	105	0.510299	3.05262	0.00200401	0.00887008	ITGB5/LIMCH1/ITGB1BP1/ITGB1/RHOA/WASF2/RAC1/PFN1/MKKS/PDLIM1/RHOC/PDCD10/S100A10/INPP5K/FAM171A1/SORBS1/FERMT2/ACTG1/PFN2/SMAD3/SFRP1/TESK1/DLC1/ABL1/BBS4/TJP1/NRP1/ZYX/MYOC/BAG4/SORBS3/LPAR1/TNFAIP1/ROCK1/PXN/PPFIA1/TGFBR1/RGCC/S1PR1/PAK1/PIK3R1/CUL3/ROCK2/RAPGEF3/ARHGEF15/FHOD1/MTOR/EVL/CD47/WNT11/PTGER4/CDC42/PHLDB2/SDC4/TPM1/SRF/CORO2B/ARHGEF10L/ELN/ARAP1/STMN1/ARRB1
SC	GOBP_REGULATION_OF_NUCLEOCYTOPLASMIC_TRANSPORT	104	0.540639	3.22331	0.00200401	0.00887008	CD36/HSP90AB1/ANP32B/NCBP2/RAN/SUMO1/YWHAE/IWS1/LEP/PARK7/APOD/TXN/PKIG/IFI27/TRIM28/MDFIC/KHDRBS1/SMAD3/RBM4/GAS6/HDAC3/NUP214/BAG3/MAPK14/CAMK1/CDK5/RBM22/DMAP1/PTPN11/HYAL2/AAAS/DHX9/PPM1A/EMD/FLNA/TARDBP/PPP1R12A/TPR/TCF7L2/HCLS1/PPP1CC/PIK3R1/JUP/BMP4/ANGPT1/NUP54/NUP153/UFM1/NOLC1/IPO5/CHP1/RAPGEF3/PRKACA
SC	GOBP_MITOCHONDRIAL_MEMBRANE_ORGANIZATION	105	0.546583	3.26967	0.00200401	0.00887008	GHITM/PDCD5/VDAC2/NDUFA13/TIMM13/IMMT/HSP90AA1/PINK1/BOK/BNIP3L/MFN2/TOMM22/ACAA2/SLC25A5/TIMM9/MTX1/MUL1/TMEM14A/NOL3/ALKBH7/TOMM70/TMEM11/BAD/RCC1L/CHCHD3/TIMM22/ROMO1/PPIF/TIMM8B/CHCHD6/BCS1L/TIMM10/SLC25A4/HEBP2/CALM3/TIMM10B/HSPA1A/SAMM50/HSPA4/BNIP3/RHOT2/BCL2L1/CHCHD10/AP3B1/UQCC3/APOO/NMT1/BCL2/MOAP1/MTX2/OXA1L/HSPA9/RHOT1/CNP/AFG3L2/ATF2/BLOC1S2/BID/MYC/GZMB/SNCA/BCL2L2/EYA2/ZNF205/HK2/S…
SC	GOBP_REGULATION_OF_PHOSPHATIDYLINOSITOL_3_KINASE_SIGNALING	106	0.341402	2.03795	0.00204499	0.00887008	HAX1/NTRK2/LEP/MYDGF/CAT/IGF1/RGL2/PIK3IP1/FGFR1/DCN/SLC9A3R1/PTEN/TWIST1/PDGFRB/EGFR/GPER1/MYOC/STAMBP/MAZ/PRR5/HCST/PDGFD/FN1/UBE3A/HCLS1/ANGPT1/INSR/PTPN6/PDGFC/TEK/KDR/TREM2/SELP/BECN1/PTPN13/SIRT1/FGR/AGT/PDGFRA/PDGFB/ROR1/FGF2/PIP5K1B/PLXNB1/JAK2
SC	GOBP_CELLULAR_RESPONSE_TO_INTERLEUKIN_1	106	0.381322	2.27624	0.00204499	0.00887008	YY1/GBP2/TNIP2/NFKB1/AKAP12/ADAMTS12/MMP2/TOLLIP/PYCARD/SFRP1/INHBB/SIRPA/MAP3K7/CCL13/HYAL2/RELA/CCL14/CEBPB/KLF2/PCK1/IL1R1/IRAK1/CCL18/UPF1/GBP1/VRK2/TANK/CCL3/CCL4/HES1/USP10/RBMX/MYD88/CD47/CCL19/NR1D1/EDN1/RC3H1/IL1RN/MYC/CCL2/GBP3/EGR1/CD40/CCL21/CCL23/CCL8/DAB2IP
SC	GOBP_POSITIVE_REGULATION_OF_TUMOR_NECROSIS_FACTOR_SUPERFAMILY_CYTOKINE_PRODUCTION	106	0.4212	2.51429	0.00204499	0.00887008	CD36/HMGB1/DDT/LPL/CLU/MIF/LEP/HSPB1/CD14/HLA-E/AKAP12/ZBTB20/PYCARD/TWIST1/FADD/PTPN11/CYBA/TYROBP/DHX9/IFNGR1/THBS1/SPON2/LY96/FZD5/LBP/APP/PIK3R1/MAPKAPK2/RIPK1/RIPK2/CCL3/MYD88/CD2/STAT3/ARID5A/CYBB/TICAM1/CCL19/IFIH1/CD86/TLR4/SASH3/PTPRC/LGALS9/ARHGEF2/SYK/IL33/ARFGEF2/JAK2/PSEN1/DDX58/AGER/NOD1
SC	GOBP_RESPIRATORY_ELECTRON_TRANSPORT_CHAIN	106	0.756283	4.51452	0.00204499	0.00887008	NDUFAB1/COX4I1/UQCRH/GHITM/CHCHD2/COX6A1/DGUOK/NDUFA2/NDUFB8/NDUFB7/NDUFS5/UQCRFS1/NDUFV2/COX5B/COX7A2L/PINK1/ISCU/NDUFS6/AIFM2/NDUFA8/COX5A/GPD1/NDUFB9/NDUFV1/SDHAF2/NDUFB4/NDUFA6/NDUFB6/NDUFA10/NDUFC1/DNAJC15/UQCR10/UQCRQ/PARK7/NDUFA12/NDUFB10/NDUFS2/NDUFA1/NDUFS4/NDUFC2/NDUFA4/ETFB/SDHB/NDUFS8/CYC1/IMMP2L/COQ9/COX7A1/DLD/NDUFB2/NDUFS3/COX7C/MT-CO3/MT-CYB/COA6/NDUFC2-KCTD14/ETFA/SDHA/GBA/MT-ND1…
SC	GOBP_LEUKOCYTE_APOPTOTIC_PROCESS	108	0.316056	1.89725	0.00204918	0.00887008	TCP1/MIF/ANXA1/PRELID1/RPS6/GPAM/HCAR2/CD74/PLEKHO2/CXCL12/TSC22D3/LGALS3/ORMDL3/BCL6/GAS6/PTEN/EFNA1/FADD/CTSL/ADA/HCLS1/AXL/SLC39A10/BMP4/CRKL/AKT1/IRF7/MEF2C/RIPK1/TNFRSF21/ST3GAL1/CCL19/IRS2/IRF3/SIRT1/KDELR1/CASP3/ARG2/FNIP1/LGALS9/GIMAP8/KITLG/CCL21/RIPK3
SC	GOBP_ACTIN_CYTOSKELETON_REORGANIZATION	108	0.426421	2.55975	0.00204918	0.00887008	HAX1/PHPT1/RALA/RHOA/GSN/ANXA1/ARHGDIB/PARVA/MYH9/HRAS/EPS8/GRB2/CTTN/MDK/ARHGDIA/DMTN/ABL1/CSF1R/DTNBP1/CDK5/GMFG/TJP1/NRP1/ESAM/FLNA/PDLIM4/EZR/HCLS1/CDC42BPB/ATP2C1/S1PR1/FES/CDC42BPA/SHC1/PAK1/PLEK/MKLN1/ANTXR1/PLEC/RAPGEF3/ABI3/RAP2A/TEK/PTPN1/DAPK3/CDC42/FGF7/EFS/NOTCH2/PDGFRA/BCAR1/FGF10/ARAP1/NEDD9/THSD7A/HCK/MCU/PARVG
SC	GOBP_SUBSTRATE_ADHESION_DEPENDENT_CELL_SPREADING	108	0.455911	2.73678	0.00204918	0.00887008	VAMP3/CIB1/ITGB1BP1/LAMB2/LAMC1/CORO1C/RHOA/FZD4/RAC1/P4HB/ILK/S100A10/CRK/PARVA/RAB1A/FERMT2/C1QBP/LAMB3/DAB2/ARPC2/ARHGEF7/MDK/TESK1/DMTN/LAMB1/ABL1/EFNA1/NRP1/MYOC/ACTN4/KANK1/CALR/LIMS2/FLNA/ITGAV/FBLN1/FN1/PXN/AXL/PIK3R1/FERMT3/CRKL/GBP1/ATRN/ANTXR1/EFNA5/TEK/MYADM/SPRY4/CDC42/TRIOBP
SC	GOBP_AUTOPHAGOSOME_ORGANIZATION	108	0.543121	3.26029	0.00204918	0.00887008	EMC6/SH3GLB1/PINK1/RAB7A/GABARAP/MFN2/NSFL1C/GABARAPL2/RALB/RNF5/RAB5A/ATG3/STX12/RAB1A/NUPR1/FEZ2/MAP1LC3B/GABARAPL1/ATG5/WDR45B/MTMR3/PHF23/UBQLN2/PIP4K2B/BAG3/MAP1LC3A/ATG101/WIPI2/RAB1B/GBA/UBQLN1/ATG9A/CHMP4A/ATG12/ATG7/ATG4B/CHMP4B/PIP4K2A/SYNPO2/RB1CC1/ADPRH/MOAP1/VMP1/ARFIP2/ULK3/WIPI1/TCIRG1/SMURF1/SNX4/RAB3GAP1/SNX7/ATG13/BECN1/SNX18/TP53INP2/TP53INP1/TMEM39A/MTM1/PACS2/ATG4D/TBC1D14/C9…
SC	GOBP_REGULATION_OF_DNA_RECOMBINATION	111	0.332681	2.00649	0.00205761	0.00887008	MORF4L1/NDFIP1/MORF4L2/MAGEF1/TERF2IP/ACTB/MEAF6/PARP3/RPA2/KAT5/VPS72/BCL6/PARP1/HMCES/KPNA2/WDR48/DMAP1/KMT5B/KDM1A/SPIDR/PPP4C/TNFSF13/MLH1/MRGBP/ACTR2/ZCWPW1/MAD2L2/THOC1/RBBP8/MMS19/RAD50/UBE2B/YEATS4/ACTL6A/ING3/STAT6/KPNA1/RUVBL2/ALYREF/SETD2/PTPRC/EXOSC3/EPC2/TFRC/SIRT6/WRAP53/TP53BP1/CD40/SMCHD1
SC	GOBP_RIBONUCLEOSIDE_DIPHOSPHATE_METABOLIC_PROCESS	111	0.397304	2.39625	0.00205761	0.00887008	NUDT5/ENO1/EIF6/GPD1/PGK1/ALDOA/PGM1/TPI1/AK2/PFKFB1/GUK1/BAD/LDHA/GAPDH/NUPR1/JMJD8/IGF1/AK3/ALDOC/TREX1/ARL2/MPP1/ZBTB20/BPGM/PGAM1/PKM/CMPK1/PRKAG1/AK1/HK1/DDIT4/AK4/MLXIPL/OGT/NUDT18/OGDH/GALK1/PFKL/APP/FBP1/PGAM2/NT5E/ZBTB7A/RRM1/INSR/GPI/NUDT16/PFKP/STAT3/GIT1
SC	GOBP_LIPID_OXIDATION	111	0.484371	2.92137	0.00205761	0.00887008	ACADVL/ADIPOR2/HADHB/HADHA/HSD17B10/ECH1/ACAA2/PHYH/ACADS/ADH5/HACL1/LEP/DGAT2/ACAA1/APOD/DECR1/ECHS1/ETFB/CRAT/ACADM/ADIPOR1/ACOT8/ACAT2/MCAT/TWIST1/ADIPOQ/ACAD11/POR/ETFA/ACAT1/BDH2/MAPK14/SCP2/ECI2/HADH/ILVBL/ECI1/ACOX2/LONP2/CYGB/SESN2/GCDH/TYSND1/AUH/PDK4/AKT1/ECHDC2/ABCD2/ACOX3/HSD17B4/SLC25A17/ACOX1/IRS2/APPL2/DECR2/ACACB/SAMD1/FABP3
SC	GOBP_CELLULAR_RESPONSE_TO_TOPOLOGICALLY_INCORRECT_PROTEIN	111	0.550953	3.32294	0.00205761	0.00887008	TMBIM6/VCP/SERP1/WFS1/OS9/HSPA8/DNAJB12/OPTN/BOK/HSPD1/HSPA5/ATF4/CREB3/DDIT3/RNF185/DDRGK1/RHBDD2/XBP1/AUP1/EIF2S1/RACK1/NFE2L2/DAXX/CCND1/RNF5/STUB1/DERL1/ERLEC1/DERL2/HERPUD1/BAG6/HSPA1A/SDF2L1/MBTPS1/UFL1/BAG3/BFAR/RNF126/DNAJB9/CDK5RAP3/HSPA14/ATF6/HSPB8/HSF1/TMED2/PIK3R1/CUL3/QRICH1/NCK1/FICD/VAPB/SERP2/PARP16/CREB3L2/HSPA9/RHBDD1/PTPN1/HSPA6/PPP1R15A
SC	GOBP_POSITIVE_REGULATION_OF_ADAPTIVE_IMMUNE_RESPONSE	107	0.314869	1.88707	0.00206186	0.00887008	CD81/HSPD1/HLA-DRA/HLA-DRB1/HLA-E/B2M/HLA-A/HLA-B/C3/PYCARD/HMCES/FADD/NECTIN2/MAP3K7/KMT5B/HLA-F/ADA/EIF2AK4/TNFSF13/MLH1/TNFSF13B/IL6ST/AZGP1/IL1R1/CD4/FZD5/MAD2L2/RIPK2/STX7/TREM2/ZBTB1/STAT6/ARID5A/SIRT1/SASH3/PTPRC/CD1C/EXOSC3/DENND1B/TFRC/CD55/TP53BP1/CD40/TRAF2/NFKBIZ/PLA2G4A
SC	GOBP_POSITIVE_REGULATION_OF_CANONICAL_WNT_SIGNALING_PATHWAY	107	0.404147	2.42213	0.00206186	0.00887008	VCP/RBPJ/CAV1/GPC3/TMEM9/ILK/VPS35/NFKB1/GID8/CTDNEP1/USP47/WLS/SMAD3/SFRP1/RSPO3/SFRP4/ATP6AP2/SOX4/EGFR/WNK1/ZBED3/KANK1/PPM1A/RPS12/BAMBI/SFRP2/YAP1/RECK/COL1A1/GPRC5B/PIN1/TBL1XR1/JUP/CSNK1E/UBE2B/CSNK1G2/TNKS2/ZEB2/DAPK3/RNF146/FAM53B/USP34/PPM1B/ADGRA2/CSNK1G3/FGF10/LGR4/CCAR2/FGF2/RNF220/NLE1/DAAM2/GSKIP
SC	GOBP_POSITIVE_REGULATION_OF_PEPTIDYL_SERINE_PHOSPHORYLATION	107	0.431342	2.58512	0.00206186	0.00887008	HSP90AB1/ATP2B4/HAX1/CAV1/HSP90AA1/PINK1/NTRK2/CREBL2/MIF/TERF2IP/PARK7/PDCD10/TXN/ARAF/CD44/PFN2/EIF4G1/GAS6/TNKS1BP1/EGFR/CAMK1/BAG4/MAPKAP1/SFRP2/FNIP2/SMYD3/RAMP3/BCL2/HCLS1/AVP/MAD2L2/PAK1/APP/ANGPT1/SPRY2/AKT1/AKAP9/RIPK2/RAPGEF3/SH2D3C/PIK3CA/STOX1/FNIP1/PRKD1/SNCA/TFRC
SC	GOBP_REGULATION_OF_NIK_NF_KAPPAB_SIGNALING	107	0.445465	2.66976	0.00206186	0.00887008	PHB2/PHB/PRDX1/RHOA/ILK/NOL3/TERF2IP/TRIP6/RBCK1/CD14/CPNE1/TMSB4X/RPS3/LITAF/TRADD/SASH1/ADIPOR1/BIRC2/TRIM44/C20orf27/NMI/MKRN2/EGFR/ACTN4/CALR/LAPTM5/RELA/PPM1A/IFI35/HDAC7/EZR/NFKBIA/IRAK1/APP/PDCD4/UACA/TSPAN6/TREM2/CCL19/EDN1/CD86/RC3H1/BCL3/TLR4/PTP4A3/PPM1B/LGALS9/MIR223
SC	GOBP_DEVELOPMENT_OF_PRIMARY_FEMALE_SEXUAL_CHARACTERISTICS	109	0.315874	1.89022	0.00208768	0.00887008	CTNNA1/SOD1/UBB/FZD4/HSPA5/A2M/ANG/LEP/NUPR1/IMMP2L/MMP2/ARID5B/ZNF830/IDH1/SLIT3/SFRP1/EIF2B5/FST/INHBB/NR2F2/BCL2L1/FOXO3/NRIP1/STAT5B/UBE3A/BCL2/CEBPB/EIF2B2/MMP19/INSR/EIF2B4/KDR/TNFAIP6/SIRT1/LHCGR/CASP3/SLIT2/TIPARP/MYC/PDGFRA/DMRTA1/KITLG/GDF9/MMP14/GNRH1/DACH1/ADAMTS1
SC	GOBP_LONG_CHAIN_FATTY_ACID_METABOLIC_PROCESS	109	0.335558	2.00801	0.00208768	0.00887008	AKR1C3/GPX1/ACOT2/GPX4/PTGES3/GSTP1/CBR1/PAM/ACSL1/HACL1/ACAA1/ELOVL1/ACAD9/MGLL/ELOVL5/ACOT8/GSTM4/EPHX1/ACOT1/SLC27A3/LTC4S/ACSL3/SCP2/ABHD12/ABHD6/PNPLA8/PTGES2/AIG1/ACOT4/PTGDS/FAAH/GSTM2/ACSL5/QKI/ELOVL3/ACSL4/ACOT7/ACSF2/CYP1B1
SC	GOBP_REGULATION_OF_RECEPTOR_MEDIATED_ENDOCYTOSIS	109	0.337824	2.02157	0.00208768	0.00887008	ANXA2/SMAP1/FLOT1/RABGEF1/RAC1/AP2M1/CLU/ARF1/CD63/PPT1/B2M/HNRNPK/DAB2/UNC119/ARF6/PICALM/C3/SDCBP/UBQLN2/SFRP4/ADIPOQ/DTNBP1/MTMR2/ITGAV/WASL/AHI1/LRPAP1/ATAD1/APOC1/APP/SCYL2/MKLN1/ANGPT1/INSR/EFNB2/CCL19/FMR1
SC	GOBP_ISOPRENOID_METABOLIC_PROCESS	116	0.338404	2.06372	0.00208768	0.00887008	AKR1C3/DHDDS/RARRES2/DHRS3/DHRS4L2/FDFT1/HTRA2/ADH1B/NPC2/PHYH/AKR1C1/RBP4/RDH5/ADH5/DGAT1/DGAT2/DHRS4/ALDH1A1/PMVK/PNPLA2/RETSAT/DPAGT1/DPM2/FDPS/ADH1C/PNPLA4/LRP1/DPM1/GGPS1/ADH1A/LIPE/DHRS7/ALDH3A2/RDH11/IDI1/RDH14/CRABP2/LSS/ALDH1A3/CYP1B1/COQ2/SRD5A3/SCPEP1
SC	GOBP_BONE_MINERALIZATION	116	0.35559	2.16853	0.00208768	0.00887008	ATRAID/GPC3/ATF4/DDR2/FBXL15/LEP/COL1A2/TXLNG/IGF1/ATP2B1/SMAD3/MGP/SLC24A3/TWIST1/SBDS/ECM1/FAM20C/OSR2/LOX/ISG15/ADRB2/SNX10/KLF10/PKDCC/CLEC3B/S1PR1/SRGN/BMP4/MEF2C/GPM6B/MINPP1/BMP6/ALPL/CCL3/OMD/ASPN/BMP2/WNT11/PTH1R/ACVR2A/FGR/LTBP3/ANO6/ACVR1/CCR1/GJA1/LGR4/BMPR2
SC	GOBP_TOR_SIGNALING	116	0.389367	2.37452	0.00208768	0.00887008	LAMTOR4/RRAGA/PINK1/LAMTOR2/GNA12/PIH1D1/LAMTOR1/LEP/SEC13/RPS6/LAMTOR5/ARAF/RHEB/EIF4EBP2/TIPRL/OTUD5/WAC/EIF4EBP1/GOLPH3/GAS6/HDAC3/RRAGD/SESN1/MLST8/PDCD6/LARP1/GBA/MAPKAP1/DDIT4/PRR5/CTNS/SESN2/RRAGB/GPR137B/ENDOG/KPTN/AKT1/NPRL2/SESN3/NPRL3/SH3BP4/DEPTOR/RRAGC/MIOS/KLHL22/TREM2/MTOR/PIK3CA/ITFG2/SIRT1/TELO2/BMT2/FNIP1/MTM1/LAMTOR3/C9orf72/WDR24
SC	GOBP_REGULATION_OF_MYELOID_LEUKOCYTE_DIFFERENTIATION	116	0.391609	2.38819	0.00208768	0.00887008	NDFIP1/HAX1/HOXA7/TFE3/HLA-DRB1/MAFB/CTNNBIP1/FSTL3/CD74/TCTA/MITF/FBN1/SFRP1/ADIPOQ/ZFP36L1/FADD/C1QC/TYROBP/KLF10/TOB2/HSF1/GPR137B/HCLS1/CEBPB/CD4/FES/FBXW7/PIK3R1/ID2/IRF7/TMEM178A/RIPK1/TRIB1/CSF1/TMEM64/ESRRA/CCL3/RB1/EVI2B/TREM2/CTNNB1/TNFAIP6/PIAS3/MTOR/TLR4/CCR1/ACIN1/MYC/NOTCH2/MIR223/FOS/RARA/SLC9B2/CDK6/KITLG/CUL4A/LILRB4
SC	GOBP_INSULIN_RECEPTOR_SIGNALING_PATHWAY	116	0.43606	2.65927	0.00208768	0.00887008	RARRES2/PTPRA/RHOQ/AP3S1/CDK4/PHIP/CAV2/ZNF106/LEP/FOXO1/PDK2/INPP5K/SORBS1/EIF4EBP2/ADIPOR1/PID1/GRB2/NUCKS1/SIK2/CCND3/SLC2A8/OSBPL8/PIP4K2B/NDEL1/GNAI2/TNS2/PTPN11/KANK1/GKAP1/OGT/PIP4K2A/SNX5/SMARCC1/SHC1/PDK4/PIK3R1/AKT1/NCK1/INSR/SESN3/NCOA5/PTPN1/IGF2/SREBF1/PIK3CA/IRS2/SIRT1/GRB14/AGT/SOCS1/ZBTB7B/APPL1/BCAR1
SC	GOBP_RNA_3_END_PROCESSING	109	0.465853	2.78771	0.00208768	0.00887008	AHCYL1/NELFE/LARP7/NCBP2/HSD17B10/SLBP/WDR33/PAF1/EXOSC4/SSB/RNF20/CPSF3/FIP1L1/ERI3/LSM10/TRMT10C/PABPC1/YTHDC1/CTR9/RNF40/INTS12/EXOSC5/ZFP36L1/SSU72/DKC1/CDK9/ELAC2/SNRPA/SUPT5H/CPSF7/HSF1/CPSF1/CLP1/INTS5/RPRD2/USB1/RPRD1A/RPS21/CSTF2T/TUT1/CSTF2/TOE1/EXOSC7/EXOSC8/APP/FBL/ZC3H3/EXOSC9/SCAF8/GRSF1/EXOSC10/INTS1
SC	GOBP_POSITIVE_REGULATION_OF_ENDOTHELIAL_CELL_MIGRATION	116	0.457615	2.79072	0.00208768	0.00887008	CIB1/SPARC/ITGB1BP1/HMGB1/RAC1/STAT5A/ANXA1/HSPB1/NFE2L2/SRPX2/TMSB4X/SASH1/GRN/FGFR1/AAMP/RRAS/PLPP3/MAPK14/ABL1/PDCD6/NRP1/ZNF580/CALR/THBS1/HDAC7/SP1/FGF1/MAP3K3/PLK2/RHOB/BMP4/ANGPT1/AKT1/ROCK2/SMOC2/GPI/RIN2/SCARB1/TEK/ATOH8/KDR/MAP2K3/EDN1/NRP2/SIRT1/HMOX1/AGT/VEGFC/ADGRA2/PRKD1/BCAR1/PDGFB/FGF2/BMPR2/RHOJ/CD40/NUS1/ANXA3/PRKD2/LGMN
SC	GOBP_CELLULAR_RESPONSE_TO_TOXIC_SUBSTANCE	109	0.484505	2.89932	0.00208768	0.00887008	SOD1/GPX1/PRDX6/CD36/PXDN/PINK1/PRDX1/ESD/GPX4/GSTP1/MGST2/TXNDC17/PRDX4/PRDX5/MGST1/FBLN5/PRDX2/MGST3/ADH5/PARK7/NQO1/TXN/NFE2L2/ALDH1A1/GSTK1/CCS/CAT/GSTO1/PRDX3/ALOX5AP/GPX7/SOD3/GPX3/GLRX/LTC4S/SESN1/H19/CYGB/AKR1A1/GSTM3/SESN2/GSTM2/RDH11/APOE/GFER/PIM1/TXNRD3/ABCB6/APOM/S100A9/TP53INP1/SRXN1/HBB/HBA2/GPX8/TXNRD1/HBA1/HBM/PTGES/GSTM1/CLIC2/DHFR/HBG2/GSTZ1/HBQ1/HBD
SC	GOBP_CELLULAR_TRANSITION_METAL_ION_HOMEOSTASIS	112	0.324902	1.96002	0.00209205	0.00887008	ACO1/SOD1/NDFIP1/ISCU/ATOX1/FTH1/ATP6V1G1/ARF1/SRI/NCOA4/FTL/CCDC115/SLC31A2/SLC39A6/NUBP1/BOLA2B/BOLA2/AP3D1/CCDC22/AP3B1/SLC40A1/ATP6AP1/SCARA5/MT1X/SLC39A10/ATP6V0D1/APP/GLRX3/MT1F/PRNP/ABCB6/SLC39A13/SLC30A1/BMP6/S100A9/MT1M/TMEM199/CYB561/HMOX1/SLC39A7/MT2A/MT1E/MYC/TFRC/CYBRD1/S100A8/SLC39A8/MT1DP/MT1A
SC	GOBP_UNSATURATED_FATTY_ACID_METABOLIC_PROCESS	112	0.345276	2.08292	0.00209205	0.00887008	AKR1C3/GPX1/GPX4/PTGES3/AKR1C2/GSTP1/CBR1/MIF/AKR1C1/ANXA1/ACAA1/ELOVL1/MGLL/ELOVL5/FABP5/CD74/PLAA/ACOT8/EPHX1/SCP2/ABHD12/ABHD6/HPGDS/FADS3/SCD/PNPLA8/TNFRSF1A/PTGES2/PTGDS/FAAH/AVP/GSTM2/CES2/ABCD2/ELOVL3/CYP1B1/ACOX1/EDN1/SIRT1/HPGD/DECR2/PIBF1/CYP2U1/PTGES/GSTM1
SC	GOBP_POSITIVE_REGULATION_OF_LIPID_LOCALIZATION	112	0.378083	2.28084	0.00209205	0.00887008	ANXA2/CD36/CAV1/DBI/LPL/TRIAP1/ACSL1/NR1H3/MIF/CES1/PRELID1/EEPD1/NFKB1/PLIN2/PLTP/GPS2/DAB2/C3/CIDEA/HILPDA/EHD1/ADIPOQ/PLIN3/SCP2/LRP1/PPARG/OXT/TMEM30A/NR1H2/NFKBIA/ABCA5/APOE/ACSL5/SREBF2/RXRA/OSBPL11/C1QTNF1/SCARB1/BMP6/SPP1/TREM2/ABCA1/EDN1/SIRT1/ACACB/FABP3/ZDHHC8/PTGES/LPCAT3
SC	GOBP_REGULATION_OF_MONONUCLEAR_CELL_MIGRATION	112	0.390522	2.35588	0.00209205	0.00887008	HMGB1/RARRES2/RHOA/CREB3/CD99L2/APOD/CRK/C1QBP/AIF1/CXCL12/MSN/LGALS3/PYCARD/GAS6/OXSR1/MDK/ECM1/NBL1/CSF1R/C3AR1/WNK1/FADD/CALR/THBS1/WASL/PDGFD/TNFRSF14/STK39/AKIRIN1/APP/CRKL/AKT1/DUSP1/CSF1/CCL3/CCL4/CMKLR1/SLAMF8/CD47/CD200/CXCL10/SLIT2/ANO6/CCR1/LGALS9/CCL2/CCL21/RIPK3/PLA2G7/AGER/LGMN/SLC8B1/JAM2/MAPK3
SC	GOBP_NEGATIVE_REGULATION_OF_RESPONSE_TO_BIOTIC_STIMULUS	110	0.412675	2.47537	0.00209205	0.00887008	HTRA1/YTHDF2/SERPING1/NR1H3/PRDX2/MUL1/A2M/BANF1/HLA-E/RPS19/SIGIRR/CRK/HLA-A/PCBP2/HLA-B/C1QBP/ATG5/LYAR/TREX1/GRN/CARD16/VSIG4/NMI/CNOT7/RNF26/PPARG/ISG15/ATG12/FGL2/IFI16/HLA-F/NR1H2/USP18/NFKBIL1/GPATCH3/GFER/TRIB1/TRIM21/TSPAN6/SLAMF8/ARG2/TRAFD1/RIOK3/PPM1B/LGALS9/NLRX1/TNFAIP3/MICA/ADAR/TTLL12/YTHDF3/IL4I1
SC	GOBP_RENAL_SYSTEM_PROCESS	113	0.31038	1.87308	0.00210084	0.00887008	AKR1C3/WFS1/RHOA/MAGED2/GSN/NPR1/INPP5K/PRKRIP1/EDNRB/ADM/SLC9A3R1/GAS6/AQP1/ADIPOQ/GNAI2/OXT/NPR3/CYBA/HYAL2/ADGRF5/CD34/BCL2/AVP/SNX5/AVPR2/BMP4/MCAM/EDNRA/SULF2/PRKACB/PRKACA/AKAP11/JCHAIN/GJA5/EDN1/IGKV3-20/HBB/AGT/BCR/IGHA1/SULF1/SGK1/CORO2B/PDGFB/AGTR1/SUCNR1
SC	GOBP_POLYOL_METABOLIC_PROCESS	113	0.311217	1.87813	0.00210084	0.00887008	PLPP1/QDPR/TPI1/SPR/ASAH1/LEP/DGAT2/PCBD1/INPP5K/ITPK1/IP6K2/INPP1/PTEN/PLPP3/GPER1/IP6K1/PGP/GBA/MTMR2/GOT1/PTS/PCK1/GALK1/OCRL/PCK2/CYP27A1/SLC5A3/PLEK/SGPP1/ISYNA1/MINPP1/NUDT3/COQ2/PTH1R/CYP2R1/LHCGR/ITPKC/SNCA/FGF2/PLA2G4A/DHFR/NUDT4/COQ3/GPD2/INPP5A
SC	GOBP_RECEPTOR_INTERNALIZATION	113	0.312036	1.88308	0.00210084	0.00887008	ANXA2/CD36/ITGB1/CAV1/CD81/FLOT1/AP2M1/ARF1/CD63/RAB5A/RAB31/CLTC/ADM/PICALM/GRB2/RAMP2/SDCBP/UBQLN2/SFRP4/DTNBP1/LRP1/MTMR2/CD9/AHI1/LRPAP1/RAMP3/EZR/ATAD1/SCYL2/MKLN1/FCER1G/ANGPT1/ITGB2/INSR/GRK3/EFNB2/FMR1/SNX1/SNCA/TFRC/SYK/ACKR3/HTR2B/RIN3/ARRB1/LILRB4/LDLRAP1
SC	GOBP_BLASTOCYST_DEVELOPMENT	113	0.342695	2.0681	0.00210084	0.00887008	RTN4/NDUFA2/DAD1/PELO/MFN2/EMG1/PSMC4/CAPN2/SF3B6/CMTM3/RPL13/PEMT/IGF1/MED21/RTF1/CTR9/ZNF830/NBN/SBDS/CITED2/NDEL1/PTPN18/WDR74/ADA/MFNG/FURIN/LPAR6/YAP1/TM4SF1/TGFBR1/TBL1XR1/ACVR1C/BYSL/CUL3/TTLL1/RBBP8/SOX17/CNOT2/COPS2/ACTL6A/ETV2/KLF4/GABPA/JUNB/CNOT1/UBE2A/SRF
SC	GOBP_REGULATION_OF_OSSIFICATION	113	0.358657	2.16443	0.00210084	0.00887008	RBPJ/ATRAID/DHRS3/DDR2/TXLNG/ATP2B1/SMAD3/MGP/SFRP1/NIPBL/TWIST1/MDK/ECM1/MAPK14/FAM20C/OSR2/PTPN11/ISG15/OXT/ADRB2/TOB2/PKDCC/BCL2/ZBTB16/S1PR1/SRGN/BMP4/MEF2C/GPM6B/CSF1/ESRRA/BMP6/CCL3/OMD/NOTCH1/BMP2/PTGER4/ACVR2A/LTBP3/ANO6/GDF10/ACVR1/CCR1/GJA1
SC	GOBP_EPITHELIAL_CELL_APOPTOTIC_PROCESS	113	0.404122	2.4388	0.00210084	0.00887008	AKR1C3/WFS1/BOK/GSN/CAST/EIF2S1/BAD/NFE2L2/TNIP2/NUPR1/TGFBR2/ANGPTL4/ARF6/CD248/RAMP2/ECSCR/GAS6/MDK/SFRP4/ZFP36L1/ABL1/GPER1/H19/SRSF6/CDH5/BCL2L1/FOXO3/THBS1/YAP1/TCF7L2/RGCC/PIAS4/ANGPT1/PDCD4/EDNRA/HIPK1/TEK/RB1/KDR/ATF2/MAP3K5/HMOX1/ANO6/BID/ZFP36/CCL2/TNFAIP3/BMPR2/ICAM1/CD40/JAK2/JAG2/KRIT1/DAB2IP
SC	GOBP_POSITIVE_REGULATION_OF_PROTEIN_KINASE_B_SIGNALING	113	0.40723	2.45755	0.00210084	0.00887008	RTN4/AKR1C3/GPX1/ITGB1BP1/ITGB1/HSP90AB1/HAX1/PHB/HSP90AA1/PINK1/AKR1C2/LEP/PARK7/MYDGF/CPNE1/MTDH/TXN/FERMT2/C1QBP/FGFR1/GAS6/OSBPL8/ENG/IGFBP5/EGFR/H19/MYOC/BAG4/MAZ/THBS1/TCF7L2/RAMP3/HCLS1/AXL/TGFBR1/F10/ANGPT1/SPRY2/C1QTNF1/INSR/CCL3/TEK/IGF2/PIK3CA/CCL19/STOX1/TPBG/P2RY12/FGF2/CHI3L1/TSPYL5/CCL21
SC	GOBP_DNA_TEMPLATED_TRANSCRIPTION_INITIATION	113	0.442502	2.67042	0.00210084	0.00887008	POLR2G/HMGB1/SUB1/POLR2I/CDK4/PIH1D1/MED4/MED7/TAF9/TAF7/CTNNBIP1/TAF12/SNAPC5/RRN3/POLR1E/GTF2A2/MITF/POLR3H/TAF11/TWIST1/RSF1/GTF2F2/TAF3/GTF2H5/SETX/CDK9/TAF10/MAZ/GTF2B/TAF9B/BRF2/CCNH/GTF2F1/GTF2E2/THRA/TBPL1/BCLAF1/ERCC1/MED12/MED30/TAF13/ERCC3/TFB2M/TAF1C/TBP/JUN/CDK7/MED14/BDP1/SRF/MYC/MED16/GTF3C5/UBTF/SMARCA5/GTF3C1/GTF2A1/TAF6L/ATF7IP/RRN3P2/MED24/MED26/PSMC6
SC	GOBP_ORGANELLE_DISASSEMBLY	113	0.635387	3.83444	0.00210084	0.00887008	VCP/PARL/KIF5B/PHB2/HAX1/MTIF3/PINK1/OPTN/GABARAP/PELO/BNIP3L/FUNDC2/MFN2/SQSTM1/FIS1/SLC25A5/HTRA2/MUL1/UFC1/TSPO/DDRGK1/GABARAPL2/PARK7/ATG3/VDAC1/UBA5/FBXO7/MAP1LC3B/CTSK/GABARAPL1/ATG5/TOMM7/WDR45B/FUNDC1/SLC25A4/CTTN/TEX264/HUWE1/CDC37/UFL1/ZFAND1/BNIP3/MAP1LC3A/WIPI2/GBA/ATG9A/ATG12/GBF1/ATG7/ATG4B/STX5/RB1CC1/VRK1/FZD5/ARFIP2/FBXW7/SREBF2/SLC25A46/UFM1/WIPI1/C5orf51/USP36/USP30/KIF9/DNM1L/…
SC	GOBP_REGULATION_OF_GENE_EXPRESSION_EPIGENETIC	122	0.333437	2.04685	0.00211416	0.00887008	GPX1/NDN/CGGBP1/CDKN1C/EIF1/ARID4A/RBM15B/POLE3/TRIM28/YTHDC1/CTR9/MPHOSPH8/MBD2/WBP2/LRIF1/CTBP1/PCGF3/KDM1A/IFI16/HNRNPU/FAM172A/TPR/KLF2/BMI1/SCMH1/CDYL/PCGF5/UPF1/TRIM27/XIST/RB1/HDAC5/IGF2/PIK3CA/EXOSC10/SMYD5/SIRT1/CBX3/SAMD1/ARID4B/ZNFX1/RRP8/SIRT6/EZH1/SUV39H1/TDG/SMCHD1/BAHD1/ATF7IP/CREBZF/HDAC1
SC	GOBP_TOLL_LIKE_RECEPTOR_SIGNALING_PATHWAY	122	0.347885	2.13554	0.00211416	0.00887008	RTN4/CD36/HMGB1/RFTN1/CAV1/FLOT1/HSPD1/NR1H3/GPR108/TNIP1/CD14/FLOT2/TNIP2/GPS2/BIRC2/NMI/NINJ1/RAB7B/MAPKAPK3/RAB11FIP2/MAP3K7/CYBA/UBQLN1/AP3B1/IFI35/LY96/PJA2/NFKBIA/IRAK1/LBP/NFKBIL1/MAPKAPK2/WDFY1/IRF7/RIPK2/UNC93B1/PELI1/MYD88/TREM2/TICAM1/NR1D1/IRF3/BIRC3/TLR4/APPL2/TICAM2/LGALS9/APPL1/LGR4/TNFAIP3/CD40/PTPRS/SCARA3/CD300A/DAB2IP/LRRC14/CTSS/TLR1/DDX3X
SC	GOBP_POSITIVE_REGULATION_OF_MITOTIC_CELL_CYCLE	122	0.358935	2.20337	0.00211416	0.00887008	CDC16/APEX1/PHB2/POLDIP2/RDX/UBE2E2/ANAPC11/CDK4/ANXA1/CPSF3/ANKRD17/CCND1/LSM10/RAB11A/KMT2E/AIF1/MEPCE/PLRG1/CCND2/EIF4EBP1/EIF4G1/CCND3/TFDP1/ABL1/EGFR/USP22/PTPN11/CUL4B/HSF1/PAFAH1B1/STAT5B/CDC23/RGCC/CCNB1/APP/AKT1/RRM1/CUL3/SMOC2/BRD4/MAD2L1BP/HES1/RB1/PKN2/STOX1/PPP1R10/CDC25B/ANAPC7/FGF10/SASS6/ANAPC4/DUSP3
SC	GOBP_REGULATION_OF_OSTEOBLAST_DIFFERENTIATION	122	0.426384	2.61742	0.00211416	0.00887008	TWIST2/ATRAID/CLIC1/ATF4/ILK/DDR2/DDX5/FERMT2/IGF1/CTNNBIP1/CEBPA/SMAD3/SFRP1/IFITM1/TWIST1/FAM20C/IGFBP5/REST/ID3/PPARG/CTHRC1/WWTR1/BAMBI/CEBPD/SFRP2/HDAC7/SUCO/YAP1/CEBPB/IL6ST/LRP3/TOB1/JUND/BMP4/LRP5/MEF2C/CRIM1/TMEM64/TCIRG1/ESRRA/BMP6/PRKACA/NOTCH1/CTNNB1/TNFAIP6/BMP2/ACVR2A/PDLIM7/SKI/SMAD5/SNAI2/GDF10/VEGFC/ACVR1/SMAD1/PRKD1/AREG/MEN1/FGF2/BMPR2/JAG1/CDK6
SC	GOBP_LYMPHOCYTE_MIGRATION	115	0.335709	2.03305	0.00211864	0.00887008	CD99/RHOA/XG/CD99L2/CKLF/APOD/CRK/AIF1/CXCL12/MSN/PYCARD/GAS6/OXSR1/ECM1/SAA1/WNK1/FADD/GBA/CCL13/EXT1/WASL/CCL14/TNFRSF14/STK39/S1PR1/APP/GPR183/CCL18/CRKL/AKT1/PLEC/HSD3B7/CCL3/CCL4/CCL19/CD200/CXCL10/CCL2/ICAM1/CCL21/RIPK3/CCL23/CCL8/CH25H
SC	GOBP_POSITIVE_REGULATION_OF_TRANSMEMBRANE_RECEPTOR_PROTEIN_SERINE_THREONINE_KINASE_SIGNALING_PATHWAY	115	0.340688	2.0632	0.00211864	0.00887008	RBPJ/HSP90AB1/CSNK2B/CDKN1C/GPC3/PELO/SNW1/CDKN2B/ILK/RBPMS/FBXL15/DAB2/TGFBR2/TGFBR3/ING2/SDCBP/PARP1/C20orf27/CITED2/ENG/INHBB/PPARG/HIPK2/CDH5/GIPC1/THBS1/TGFBR1/BMP4/FKBP8/ACVRL1/BMP6/ZEB2/ZC3H3/TGFB1I1/HES1/NOTCH1/KDR/NUMA1/ZNF423/BMP2/MSX1/ACVR2A/GDF10/ACVR1/SULF1/NOTCH2/MEN1/BMPR2/JAK2/RNF111/GDF9
SC	GOBP_NEGATIVE_REGULATION_OF_VASCULATURE_DEVELOPMENT	115	0.35739	2.16434	0.00211864	0.00887008	SPARC/ATP2B4/SERPINF1/PGK1/COL4A2/STAT1/NAXE/NPR1/TNMD/DCN/PTPRM/ECSCR/CLDN5/PPARG/THBS4/THBS1/HOXA5/GADD45A/ROCK1/PLK2/KLF2/STAB1/RGCC/SPRY2/ROCK2/HSPG2/THBS2/PDE3B/EMILIN1/HGS/TEK/AMOT/CTNNB1/KLF4/ATF2/CXCL10/AGT/SULF1
SC	GOBP_CELLULAR_RESPONSE_TO_INTERFERON_GAMMA	115	0.440445	2.66732	0.00211864	0.00887008	VAMP3/KIF5B/HSP90AB1/VIM/GBP2/ASS1/NR1H3/VPS26B/STAT1/MYO1C/GSN/JAK1/HLA-DPA1/GAPDH/RAB20/AIF1/CASP1/CDC42EP2/ACTG1/SYNCRIP/RPL13A/CD58/CDC42EP4/NMI/CDC37/RAB7B/SIRPA/ZYX/PPARG/CCL13/MRC1/CCL14/NR1H2/ACTR2/ACTR3/STXBP1/IRF8/STX8/CCL18/GBP1/FLNB/CCL3/CCL4/STX4/CD47/CCL19/EDN1/TLR4/DAPK3/CDC42/MYC/LGALS9/CCL2/SOCS1/GBP3/JAK2/CCL21/CCL23/CCL8
SC	GOBP_COMPLEMENT_ACTIVATION	118	0.310932	1.89457	0.00212766	0.00887008	PHB2/PHB/C1S/CD59/SERPING1/CLU/CFD/A2M/C1QBP/C1R/MFAP4/CFH/C1QA/C3/VSIG4/C1QB/C1QC/TRDC/TRBC2/RGCC/TRBC1/COLEC11/IGKC/TREM2/IGLC3/IGLC2/IGLC1/CFB/IGHA1/C6/C1RL/CD55/IGLL5/C7/IGHM
SC	GOBP_POSITIVE_REGULATION_OF_CELL_CYCLE_PHASE_TRANSITION	117	0.334987	2.04138	0.00212766	0.00887008	CDC16/APEX1/PHB2/RDX/UBE2E2/PAF1/ANAPC11/CDK4/DDRGK1/ANXA1/CPSF3/ANKRD17/NPM1/CCND1/LSM10/RAB11A/KMT2E/AIF1/MEPCE/PLRG1/CCND2/EIF4G1/DDX39B/CCND3/TFDP1/EGFR/CUL4B/CDC23/PAGR1/RGCC/CCNB1/APP/AKT1/RRM1/THOC1/CUL3/BRD4/MAD2L1BP/RB1/STOX1/PPP1R10/CDC25B/ANAPC7/FGF10/SASS6/ANAPC4
SC	GOBP_TRNA_PROCESSING	117	0.380949	2.32146	0.00212766	0.00887008	DDX1/TRMT112/HSD17B10/RTCB/POP7/DALRD3/SSB/RPP25L/POP5/LAGE3/RPP21/TRMT10C/ELP5/DPH3/POP4/URM1/TRMT6/FTSJ1/TRMO/LSM6/TSEN34/TRMT1/TRPT1/KTI12/RPP40/ELAC2/METTL1/TRMT61B/DUS1L/THUMPD3/CLP1/PUSL1/RPP25/ELP3/TRMT1L/FARS2/TRMT13/TYW1/TPRKB/ALKBH1/TRMT61A/CTU2/GRSF1/TYW3/CTU1/OSGEPL1/PUS3/TP53RK/DUS2/DUS3L/RPP38/TSEN15/TRUB1/CDK5RAP1
SC	GOBP_REGULATION_OF_GLUCOSE_METABOLIC_PROCESS	117	0.425987	2.59592	0.00212766	0.00887008	RANBP2/PFKFB1/BCKDK/LEP/DGAT2/FOXO1/BAD/PDK2/INPP5K/SORBS1/LCMT1/IGF1/ACADM/PPP1CA/ADIPOR1/IGFBP4/ARPP19/SDHAF3/FAM3C/NNMT/ADIPOQ/POMC/PPP1CB/PGP/DUSP12/USP7/WDR5/OGT/PPP4R3B/CLK2/KAT2A/SESN2/PHLDA2/PDK4/FBP1/AKT1/GPT/C1QTNF1/INSR/EPM2AIP1/KHK/IGF2/IRS2/RGN/SLC25A12/NCOA2/SIRT1/CRY1/ACACB
SC	GOBP_REGULATION_OF_DNA_BINDING	117	0.427506	2.60518	0.00212766	0.00887008	CEBPG/EDF1/HMGB1/SUMO3/CSNK2B/CALM1/SRI/DDIT3/SUMO1/DDRGK1/ZNF593/PARK7/CPNE1/CALM2/NME1/TXN/LAMTOR5/TMSB4X/IGF1/CTNNBIP1/TRIM28/CALM3/PARP1/TWIST1/RSF1/HABP4/PINX1/PPARG/HIPK2/TAF10/KDM1A/IFI16/GTF2B/HMGB2/ID1/NFKBIA/MAD2L2/FBXW7/ZBTB7A/ACD/MDFI/GZMA/HEY1/HES1/RB1/CTNNB1/KLF4/ZC4H2/MSX1/JUN/BCL3/SKI/HMOX1/MYC/MMP9/PLAUR/RNF220/JAK2/PSEN1
SC	GOBP_REGULATION_OF_CELL_MATRIX_ADHESION	117	0.436004	2.65697	0.00212766	0.00887008	CIB1/LIMCH1/ITGB1BP1/CD36/POLDIP2/PTPRA/CORO1C/RHOA/RAC1/EFEMP2/HOXA7/APOD/S100A10/FERMT2/ACTG1/VCL/SMAD3/MAP4K4/SFRP1/BCL6/PTEN/RRAS/SLK/THY1/DMTN/DLC1/ABL1/RASA1/NRP1/MYOC/THBS1/UTRN/ROCK1/BCL2/ADAM15/PIK3R1/JUP/DUSP22/ROCK2/GPM6B/CSF1/BST1/RIN2/MACF1/ACVRL1/EFNA5/FAM107A/TEK/KDR/LDB1/DAG1/DAPK3/PHLDB2/SDC4/COL16A1/DDR1/JAG1/DUSP3/CDK6/CCL21
SC	GOBP_NUCLEAR_TRANSCRIBED_MRNA_CATABOLIC_PROCESS	117	0.524259	3.19479	0.00212766	0.00887008	POLR2G/YBX1/CSDE1/LSM1/DCP1A/NCBP2/PELO/HNRNPD/EXOSC4/PYM1/THRAP3/DDX5/SSB/ETF1/LSM4/NBAS/XRN2/PNRC2/GSPT1/PABPC1/UPF3B/HNRNPAB/SYNCRIP/CNOT8/PRPF18/UPF2/CASC3/EXOSC5/PAIP1/ZFP36L1/MAGOHB/CNOT7/ZFP36L2/SMG7/UPF3A/GSPT2/MAGOH/SMG5/DHX9/RBM8A/HNRNPU/MLH1/NT5C3B/SKIV2L/TUT1/EXOSC7/EXOSC8/TOB1/PCID2/UPF1/BTG2/CNOT2/DXO/PAN3/LSM7/CTIF/EXOSC9/RNPS1/EXOSC10/DCP1B/EDC4/CNOT1/RC3H1/EIF3E/EXOSC3/TNRC6A/ZFP…
SC	GOBP_TRANSLATIONAL_INITIATION	118	0.698966	4.25895	0.00212766	0.00887008	DDX1/EIF3K/POLR2G/EIF3L/EIF2S2/EIF3A/EIF1AX/MTIF3/CSDE1/EIF6/YTHDF2/NCBP2/EIF4EBP3/SLBP/EIF3D/EIF5B/PAIP2/EIF4H/EIF1/CDC123/ATF4/EIF1B/EIF3J/EIF3H/RPS3A/HSPB1/EIF3I/EIF3F/EIF2S1/EIF4B/EIF4G2/YTHDF1/RPS5/NPM1/DHX29/RPS3/EIF2AK1/EIF5/EIF4EBP2/EIF2B1/EIF4E2/EIF3B/RPL13A/PPP1CA/EIF4A1/EIF2B3/BZW2/EIF4EBP1/EIF4G1/KHDRBS1/EIF4A2/EIF3G/RBM4/PAIP1/EIF2B5/MIF4GD/RPS17/HABP4/EIF3C/LARP1/DNAJC3/C8orf88/EIF2…
SC	GOBP_OXIDATIVE_PHOSPHORYLATION	118	0.725427	4.42019	0.00212766	0.00887008	VCP/NDUFAB1/COX4I1/UQCRH/GHITM/CHCHD2/COX6A1/DGUOK/NDUFA2/STOML2/NDUFB8/NDUFB7/NDUFS5/UQCRFS1/NDUFV2/COX5B/COX7A2L/PINK1/ISCU/NDUFS6/NDUFA8/COX5A/NDUFB9/NDUFV1/RHOA/SDHAF2/NDUFB4/NDUFA6/NDUFB6/NDUFA10/NDUFC1/UQCRC1/COX7A2/DNAJC15/UQCR10/UQCRQ/PARK7/NDUFA12/NDUFB10/NDUFS2/NDUFA1/NDUFS4/NDUFC2/UQCC2/NDUFA4/NDUFS8/CYC1/NUPR1/PPIF/COQ9/COX7A1/DLD/NDUFB2/NDUFS3/COX7C/MT-CO3/MT-CYB/COA6/NDUFC2-KCTD14/U…
SC	GOBP_PEPTIDYL_THREONINE_MODIFICATION	120	0.314382	1.92314	0.00213675	0.00887008	CSNK2B/CALM1/CALM2/INPP5K/TGFBR2/UBE2K/EIF4G1/CALM3/GALNT1/TNKS1BP1/OXSR1/PARD3/DMTN/CDK5/WNK1/HIPK2/DDIT4/PRKDC/CAB39/ROCK1/BCL2/CDC42BPB/STK39/TGFBR1/VRK1/DYRK4/CDC42BPA/APP/SPRY2/AKT1/ROCK2/CLK1/RIPK2/CAMK2D/HIPK1/GALNT2/PRKACA/HIPK3/SPRED2/MTOR/ATF2/STOX1/TTC36/CSNK2A2/ACVR1/PRKD1/DYRK2/CHI3L1/DYRK1B/GALNT11/PRKD2/ULK1/PRKCD/DCAF1/AXIN1/GRK2/CDK1/PKN1
SC	GOBP_HEMATOPOIETIC_PROGENITOR_CELL_DIFFERENTIATION	119	0.328134	2.005	0.00213675	0.00887008	XRCC5/YTHDF2/NFE2L2/PRRC2C/PDCD2/FSTL3/EEF2/TREX1/SFRP1/SBDS/CITED2/FST/UFL1/SOX4/ABL1/CSF1R/REST/SLC7A6OS/HYAL2/EXT1/AP3B1/CEBPD/SOS1/PRKDC/MEOX1/BCL2/JAM3/BMP4/PLEK/PTPN6/HSPA9/HES1/NOTCH1/KDR/MLF1/ZBTB1/ATF2/BLOC1S2/BATF/FNIP1/PTPRC/SRF/RRS1/SOS2/TCF15/PDGFRA/HOXB3/CDK6/KITLG/PSEN1/ADAR
SC	GOBP_CELL_AGING	119	0.338074	2.06574	0.00213675	0.00887008	SOD1/YBX1/CDKN2B/MIF/RWDD1/PRELP/NEK6/B2M/NPM1/LMNA/ROMO1/HRAS/KAT5/ING2/EEF1E1/BCL6/PTEN/TWIST1/CITED2/MAPK14/ABL1/YPEL3/ZMIZ1/CALR/MME/MAP3K3/RSL1D1/BCL2/PLK2/ERCC1/ID2/MAP2K1/PDCD4/ULK3/MAP2K4/NUAK1/ABI3/CDKN1B/MAP2K3/CDKN1A/SIRT1/MAP3K5/ARG2
SC	GOBP_FORMATION_OF_PRIMARY_GERM_LAYER	119	0.342332	2.09176	0.00213675	0.00887008	ITGB5/ITGB1/MESP1/PAF1/COL5A2/COL4A2/COL6A1/ITGA7/LAMB3/COL12A1/RTF1/MMP2/HSBP1/CTR9/WLS/SMAD3/LAMB1/PRKAR1A/COL5A1/ITGAV/SFRP2/FN1/KIF16B/ITGA5/BMP4/DUSP1/SOX17/ITGB2/GPI/DUSP4/PRKACA/ETV2/ATOH8/EXOC4/CTNNB1/WNT11/ETS2/KLF4/SETD2/MMP15/ACVR1/SRF/GJA1/SMAD1/MMP9/TXNRD1/EYA2/BMPR2
SC	GOBP_REGULATION_OF_DNA_BIOSYNTHETIC_PROCESS	120	0.377153	2.30712	0.00213675	0.00887008	CCT5/TCP1/XRCC5/HSP90AB1/HSP90AA1/CCT7/CCT8/CCT6A/CCT4/PTGES3/HNRNPD/HNRNPC/MEAF6/PCNA/PARP3/TEN1/ING4/CCT3/HNRNPA1/TFDP1/ADIPOQ/PDGFRB/JADE1/PINX1/DKC1/PARM1/SMG5/HNRNPU/CCT2/CHTF8/RGCC/NABP2/HNRNPA2B1/GFER/ACD/PNKP/SMOC2/PARP4/ACVRL1/TNKS2/CYP1B1/NEK7/CTNNB1/KLF4/EXOSC10/CDKN1A/RFC3/RGN/RFC4/MYC/HMBOX1/PDGFB/MEN1/FGF2/BMPR2/WRAP53/MAP3K4
SC	GOBP_REGULATION_OF_PROTEIN_CONTAINING_COMPLEX_DISASSEMBLY	119	0.383245	2.34175	0.00213675	0.00887008	CIB1/RDX/MTPN/MAP1B/FLII/CAPZB/DSTN/SPTBN1/ETF1/GSN/ASPH/CFL2/LIMA1/GSPT1/WDR1/ADD1/ATG5/TWF2/EPS8/CAPZA1/PHF23/TBC1D25/SPTAN1/DMTN/BNIP3/SCAF4/MID1/CAPG/SETX/LMOD1/GBA/ADRB2/ATG12/GLE1/TMOD1/EIF5A/SWAP70/TWF1/FYCO1/PLEK/UPF1/MAP1A/SVIL/INSR/UVRAG/SCAF8/CAMSAP2/PIK3CA/TRIOBP/JMJD4/TMEM39A/ARHGEF2/CKAP2/NES/STMN2/KATNB1/ATXN7
SC	GOBP_MITOTIC_SPINDLE_ORGANIZATION	120	0.403136	2.46606	0.00213675	0.00887008	VCP/CHMP3/POLDIP2/CHMP2A/RHOA/BCCIP/RAN/DCTN2/DRG1/TUBG2/MAP4/NUDC/NEK6/CHMP2B/PARP3/RAB11A/DCTN1/SMC3/KPNB1/CLTC/OFD1/CHMP1A/TACC1/CHMP6/HSPA1A/CKAP5/RAE1/SBDS/LSM14A/EML3/CHMP5/CHMP4A/DCTN6/TUBG1/AAAS/CHMP7/FLNA/KIF3B/HNRNPU/PDCD6IP/SUN2/TPR/CHMP4B/PLK2/CCNB1/MAP9/SMC1A/NUMA1/KIF2A/STAG1/MZT1/PIBF1/RMDN1/CCDC61/PTPA/ANKRD53/HSPA1B/ZNF207/STMN1
SC	GOBP_POSITIVE_REGULATION_OF_CELL_SUBSTRATE_ADHESION	120	0.438087	2.67986	0.00213675	0.00887008	CIB1/ITGB1BP1/CD36/POLDIP2/CCDC80/RAC1/P4HB/ILK/EFEMP2/FBLN2/S100A10/CRK/RSU1/FERMT2/C1QBP/DAB2/ARPC2/ARHGEF7/ARL2/SMAD3/MAP4K4/EGFLAM/SFRP1/MDK/RRAS/ECM2/THY1/TESK1/DMTN/ABL1/NRP1/MYOC/EGFL6/CALR/LIMS2/NID1/FLNA/UTRN/ROCK1/FN1/VIT/ITGA5/JUP/CRKL/CSF1/ABI3BP/RIN2/EMILIN1/TEK/KDR/DAG1/MYADM/CDC42/TRIOBP/SDC4/COL16A1/PDGFB/JAK2/CDK6/CCL21/DOCK1/NEDD9/EDIL3/LIMS1
SC	GOBP_LYSOSOMAL_TRANSPORT	120	0.445312	2.72406	0.00213675	0.00887008	VCP/CHMP3/CHMP2A/PINK1/HSPA8/RAB7A/SNAPIN/CLU/PSAP/VPS35/VPS4A/NCOA4/VPS51/UBXN6/TSG101/CHMP2B/VPS16/BIN1/M6PR/RILP/WASH3P/VPS39/GRN/CHMP1A/ARL8B/CHMP6/SORT1/AP3D1/HSPA1A/VAMP7/HMGXB4/CCDC91/RAB7B/VIPAS39/LRP1/CHMP5/ADRB2/CHMP4A/LAPTM5/LAMP2/CHMP7/AP3B1/CHMP4B/LAMP1/HOOK2/MVB12A/TRAK1/RHOB/VPS52/STX8/SCYL2/HGS/HGSNAT/USE1/MTM1/AP3M1/VPS18/VPS41/AKTIP/LYST/C9orf72/GGA3/SNX16/KIF13A
SC	GOBP_POSITIVE_REGULATION_OF_RESPONSE_TO_DNA_DAMAGE_STIMULUS	119	0.447872	2.73665	0.00213675	0.00887008	CEBPG/MORF4L1/HMGB1/MORF4L2/MGMT/DDX5/ACTB/MEAF6/NSMCE4A/PCNA/NSMCE1/PARP3/RPS3/BABAM1/ING4/TRIM28/UBE2N/KAT5/FXR1/VPS72/EEF1E1/PARP1/EGFR/WDR48/DMAP1/KMT5B/RPL26/DHX9/XRCC1/SPIDR/PRKDC/ENDOG/UBE2V2/MRGBP/ACTR2/ZCWPW1/PIAS4/TMEM161A/BCLAF1/MAD2L2/PNKP/RBBP8/MMS19/YEATS4/SETMAR/BRCC3/ACTL6A/ING3/NACC2/SPRED2/SLF1/RUVBL2/MSX1/FMR1/SIRT1/MYC/EPC2/SPIRE1/FGF10/CCAR2/EYA2/WRAP53
SC	GOBP_POSITIVE_REGULATION_OF_MRNA_METABOLIC_PROCESS	119	0.460152	2.81168	0.00213675	0.00887008	PRDX6/POLR2G/YBX1/CSDE1/HSPA8/LSM1/YTHDF2/DCP1A/NCBP2/SNW1/HNRNPD/PAF1/PUM1/CIRBP/THRAP3/YTHDF1/PABPC1/RIDA/CELF1/NCL/SYNCRIP/CNOT8/EXOSC5/PAIP1/ZFP36L1/CNOT7/ZFP36L2/RBM3/SNRNP70/DHX9/TARDBP/HNRNPU/TRA2B/HSF1/SF3B4/ROCK1/MLH1/NT5C3B/EXOSC7/EXOSC8/TOB1/ZC3HAV1/UPF1/ROCK2/BTG2/CNOT2/TRA2A/PAN3/RBMX/EXOSC9/DCP1B/CNOT1/RC3H1/EXOSC3/TNRC6A/ZFP36
SC	GOBP_NEGATIVE_REGULATION_OF_ESTABLISHMENT_OF_PROTEIN_LOCALIZATION	119	0.490382	2.99639	0.00213675	0.00887008	ITGB1BP1/NDFIP1/CD36/OS9/JAGN1/NDUFAF2/ADRA2A/NR1H3/SUMO1/GOPC/PARK7/APOD/UBE2J1/TXN/INPP5K/SNX3/PKIG/ERLEC1/INSIG1/DNAJA1/DERL2/DPH3/UCP2/SNX12/MDFIC/SERGEF/SFRP1/LMAN1/PIM3/ADIPOQ/BAG3/DMTN/REST/CDK5/HADH/INHBB/BAG4/PTPN11/GDI1/PKDCC/PPP3CA/APOE/PFKL/ACVR1C/ANGPT1/KLF7/ERP29/UFM1/WWP2/FKBP1B/CHP1/RHBDF1/UBE2G2/NDFIP2/SREBF1/UBAC2/CSK/CD200
SC	GOBP_NEGATIVE_REGULATION_OF_PROTEIN_CATABOLIC_PROCESS	120	0.506451	3.09805	0.00213675	0.00887008	ANXA2/HSP90AB1/ATRAID/PHB/TIMP2/UBXN1/EIF3H/TIMP3/FYN/CTSA/VPS35/DDRGK1/PSMF1/GABARAPL2/TIMP4/MYCBP2/PARK7/CAMLG/TAF9/CST3/SNX3/DEDD/RILP/RPS7/SNX12/RPL11/UCHL5/WAC/F8A1/SDCBP/BAG6/RPL5/SMAD3/PDCL3/EGFR/EFNA1/ALAD/TIMP1/SNRNP70/HIPK2/USP7/CDK5RAP3/RELA/GIPC1/FLNA/OGT/ROCK1/FURIN/BAG5/SMARCC1/AZIN1/MAD2L2/PIN1/SGTA/AQP11/N4BP1/MAP1A/TRIM39/USP14/RPL23/RYBP/TTC36/CSNK2A2/RIC1/MTM1/SNCA/F8A3/CCAR2/P…
SC	GOBP_RESPONSE_TO_ACID_CHEMICAL	120	0.518258	3.17028	0.00213675	0.00887008	TMBIM6/LAMTOR4/ATP2B4/RRAGA/TOMM20/CDO1/NTRK2/RHOA/LAMTOR2/HNRNPD/COL5A2/ASS1/FYN/COL3A1/CAPN2/TOMM70/LAMTOR1/XBP1/NQO1/BAD/PCNA/COL6A1/LAMTOR5/TAF9/COL1A2/COL4A1/HNRNPAB/MMP2/UFL1/RRAGD/SESN1/EGFR/ALAD/CYBA/CRLS1/BCL2L1/SIX1/PDGFD/HSF1/SESN2/RRAGB/CEBPB/KLF2/PCK1/PKD2/ZEB1/COL1A1/IPO5/SESN3/PLEC/SH3BP4/CDKN1B/PDGFC/RRAGC/GLRB/KLHL22/MTOR/NSMF/PIK3CA/CYBB/ATF2/EDN1/CASP3/LAMTOR3/MYC/COL16A1/SOCS1…
SC	GOBP_PROTEIN_LOCALIZATION_TO_MITOCHONDRION	120	0.674733	4.12747	0.00213675	0.00887008	UBE2L3/PARL/PDCD5/NDUFA13/BCAP31/HAX1/MFF/TIMM13/SH3GLB1/HSP90AA1/PINK1/UBE2D3/TOMM5/TIMM23/TOMM20/RALA/HSPD1/BNIP3L/MFN2/GRPEL1/MTCH2/FIS1/TOMM22/HTRA2/TIMM9/AIP/DDIT3/DNAJC15/TSPO/TOMM70/DNAJC19/CHCHD4/SAE1/PAM16/TIMM22/UBE2J2/PITRM1/UBL5/DNAJA1/ROMO1/FBXO7/IMMP2L/TIMM8B/BCS1L/TIMM10/TOMM7/CALM3/TIMM10B/TOMM34/LMAN1/HUWE1/SAMM50/HSPA4/MTERF4/BAG3/BAG4/ISG15/BAP1/HK1/ABLIM3/AP3B1/NMT1/PMPCB/MOAP…
SC	GOBP_STEROL_TRANSPORT	123	0.356964	2.18967	0.00215054	0.00887008	ANXA2/CD36/CAV1/CLU/NR1H3/NPC2/CES1/VAPA/VPS4A/TSPO/AKR1C1/LAMTOR1/EEPD1/NAXE/LEP/LIMA1/STX12/NFKB1/PLTP/GPS2/ARL8B/OSBPL8/ADIPOQ/TSKU/OSBPL1A/SCP2/LRP1/PPARG/NR1H2/FURIN/PIP4K2A/NFKBIA/ABCA5/APOE/APOC1/SREBF2/RXRA/OSBPL11/OSBP/STARD3/OSBPL9/APOM/SCARB1/ARV1/TREM2/ABCA1
SC	GOBP_NUCLEOSIDE_BISPHOSPHATE_METABOLIC_PROCESS	123	0.411991	2.52721	0.00215054	0.00887008	ACSS2/GLYAT/ACOT2/PDHA1/ACSL1/PPT1/PPCS/SLC25A1/ABHD14B/MPC2/DGAT1/DGAT2/ELOVL1/PDK2/PMVK/GPAM/NUDT8/ELOVL5/ACSM5/DLD/ACOT8/OXSM/COASY/ACOT1/ACLY/TECR/ACSL3/ACAT1/PAPSS2/SULT1A4/NUDT7/ACOT4/SLC35B3/SULT1A2/OGDH/PAPSS1/GCDH/TPST2/SUCLA2/PDK4/SUCLG2/PPCDC/ACSL5/PPT2/SLC35B2/ELOVL3/ACSL4/ACOT7/ACSF2/FAR1/DCAKD/HSD17B4/TPST1/PDHB/DLAT/ACACB
SC	GOBP_MONOCARBOXYLIC_ACID_CATABOLIC_PROCESS	123	0.438794	2.69163	0.00215054	0.00887008	ACADVL/PGD/HADHB/FAH/HADHA/HSD17B10/ECH1/ACAA2/PHYH/ACADS/HACL1/LEP/ACAA1/DECR1/ECHS1/ETFB/NUDT8/CRAT/ACADM/ACOT8/ACAT2/MCAT/TWIST1/ADIPOQ/ACAD11/ETFA/ACAT1/BDH2/SCP2/ECI2/HADH/ILVBL/ECI1/ACOX2/LONP2/NUDT7/AIG1/LDHD/AKR1A1/FAAH/SESN2/GCDH/PCK1/TYSND1/AUH/PCK2/LPIN2/AKT1/ECHDC2/ABCD2/ACOX3/IDNK/HSD17B4/SLC25A17/ACOX1/IRS2/DECR2/ACACB/CYP26B1/PCCB
SC	GOBP_MRNA_TRANSPORT	123	0.468634	2.87467	0.00215054	0.00887008	CETN2/NCBP2/SLBP/THOC7/RANBP2/MYO1C/IWS1/SEC13/SRSF3/SRSF7/NUTF2/RBM15B/SARNP/UPF3B/ALKBH5/DDX19B/NXT1/YTHDC1/PABPN1/POLDIP3/UPF2/DDX39B/HNRNPA1/CHTOP/RAE1/AGFG1/NUP214/ZFP36L1/DDX39A/ZC3H11A/SMG7/SRSF1/UPF3A/ENY2/SMG5/AAAS/DHX9/THOC2/GLE1/TPR/HSF1/EIF5A/HNRNPA2B1/PCID2/UPF1/THOC1/QKI/NUP54/BICD2/NUP153/LRPPRC/NUP85/ZC3H3/CETN3/NXF1/FMR1/HNRNPA3/ALYREF/MCM3AP/THOC6/AKAP8L/SETD2/ZFP36/NDC1/NUP88/A…
SC	GOBP_REGULATION_OF_PROTEIN_LOCALIZATION_TO_CELL_PERIPHERY	123	0.49789	3.05413	0.00215054	0.00887008	CIB1/KIF5B/PGRMC1/ITGB1/ATP2B4/VTI1B/PPP2R5A/MRAP/RER1/SQSTM1/RHOQ/AP2M1/RANGRF/VPS4A/GOPC/SPTBN1/ACTB/RACK1/TMEM59/SORBS1/CLTC/DAB2/AR/HECTD1/HRAS/RHOG/VAMP8/PID1/ARF6/PICALM/LGALS3/ZDHHC7/TMBIM1/ACSL3/EGFR/GPER1/CDK5/LRP1/BCL2L1/PKDCC/RAMP3/EZR/ZDHHC5/PPFIA1/CNST/ZDHHC2/ATP2C1/PIK3R1/STX8/GPC6/AKT1/GBP1/EPB41L2/CLIP3/PRNP/GPC4/RAP1A/ABI3/STX7/STX4/TREM2/NUMA1/DAG1/CSK
SC	GOBP_MICROTUBULE_POLYMERIZATION_OR_DEPOLYMERIZATION	121	0.322093	1.96563	0.00215517	0.00887008	CIB1/MAP1B/RAC1/CRYAB/RANGRF/DRG1/TUBG2/MAPRE1/RPS3/DCTN1/ARL3/ARHGEF7/ARL2/HSPA1A/CKAP5/SLAIN2/NDEL1/ABL1/MID1/CDH5/TUBG1/TPPP3/RANBP9/MAP7D3/FES/PAK1/PIN1/FKBP4/CDK5RAP2/AKAP9/MAP1A/CLIP3/PRUNE1/CDKN1B/NUMA1/MAPRE2/CAMSAP2/GIT1/GAS2L1/KIF2A/GBA2/MZT1/TBCD/SNCA/ARHGEF2/CKAP2/ANKRD53/NIN/HSPA1B/MAPRE3/ZNF207/STMN2/STMN1/KATNB1/ATXN7/SKA2/MAP1S
SC	GOBP_AXON_EXTENSION	121	0.334468	2.04115	0.00215517	0.00887008	RTN4/LAMB2/ITGB1/HSP90AB1/NDN/HSP90AA1/MAP1B/PPP3CB/GOLGA4/USP9X/EIF4G2/RAB11A/CYFIP1/VCL/TWF2/CXCL12/DPYSL2/CTTN/SLIT3/SEMA3G/DBN1/NDEL1/ABL1/CDK5/NRP1/ADNP/SEMA3C/GDI1/PLXNA4/PAFAH1B1/FN1/DBNL/APOE/OLFM1/DVL1/RYK/EDNRA/SEMA3B/MACF1/ARHGAP4/TRPV2/SHTN1/EDN1/ZFYVE27/NRP2/RNF6/NRCAM/SLIT2/RAPH1/SRF/C9orf72/BMPR2/DCLK1/PTPRS/ALCAM
SC	GOBP_RESPONSE_TO_ESTRADIOL	121	0.380348	2.32114	0.00215517	0.00887008	GPX1/GPX4/MAP1B/HNRNPD/PAM/CRYAB/ASS1/ANXA1/LEP/NQO1/BAD/PCNA/CCND1/CAT/FAM210B/MMP2/KAT5/TXNIP/SFRP1/MBD2/PDGFRB/EGFR/GPER1/OXT/NR2F2/CALR/CRHBP/NRIP1/HSF1/STAT5B/RAMP3/ENDOG/ARPC1B/STXBP1/COL1A1/GPI/CSN1S1/ESRRA/PENK/CDKN1B/CYP1B1/CTNNB1/STAT3/SOCS2/RUVBL2/ZNF703/HPGD/CASP3/NCOR2/AGT/MMP15/MYC/AIFM1/PTGFR/BCL2L2/RARA/AREG/FGF10
SC	GOBP_REGULATION_OF_LEUKOCYTE_CHEMOTAXIS	121	0.400401	2.44352	0.00215517	0.00887008	HMGB1/RARRES2/DDT/RAC1/MMP28/CREB3/VEGFB/MIF/C1QBP/AIF1/CD74/CXCL12/MPP1/GAS6/OXSR1/MDK/NBL1/CSF1R/C3AR1/WNK1/ZNF580/THBS4/CALR/THBS1/MTUS1/STK39/SWAP70/AKIRIN1/JAM3/LBP/GPSM3/VEGFD/DUSP1/CSF1/BST1/RAC2/CCL3/CCL4/CMKLR1/SLAMF8/DNM1L/TNFAIP6/CCL19/EDN1/CXCL10/SLIT2/ANO6/VEGFC/CCR1/LGALS9/CCL2/MIR223/CCL21/RIN3/PLA2G7/GPR18/DPP4/MCU/LGMN/PTN
SC	GOBP_RESPONSE_TO_HYDROGEN_PEROXIDE	121	0.550776	3.36121	0.00215517	0.00887008	SOD1/GPX1/APEX1/PINK1/OSER1/CRYAB/FYN/CAPN2/STAT1/ANXA1/PARK7/NQO1/PDCD10/BAD/PCNA/RACK1/TXN/NFE2L2/CRK/CAT/RPS3/PPIF/PRDX3/MMP2/TXNIP/SIGMAR1/AQP1/GLRX2/PDGFRB/STK24/ABL1/BNIP3/MAP1LC3A/STK25/SIRPA/ZNF580/SETX/FOXO3/RELA/PDGFD/HSF1/PPP2CB/UBE3A/BCL2/TRAP1/ENDOG/AXL/KLF2/IL18BP/RHOB/COL1A1/NET1/RIPK1/FKBP1B/IMPACT/CYP1B1/MT-ND5/STAT6/BECN1/EDN1/SIRT1/MAP3K5/HMOX1/CASP3/PDE8A/HBB/MT-ND6/HBA2/AIFM1…
SC	GOBP_GLIAL_CELL_DEVELOPMENT	114	0.36413	2.19573	0.00215983	0.00887008	SOD1/LAMB2/VIM/NTRK2/CLU/ILK/MXRA8/EIF2B1/NDRG1/GRN/EIF2B3/C1QA/PTEN/MDK/EIF2B5/PARD3/SOX4/NCSTN/CDK5/LRP1/MYOC/NSUN5/WASF3/IFNGR1/ID4/LGI4/APP/MED12/AKT1/EIF2B2/SLC25A46/EIF2B4/PHGDH/PLEC/HDAC11/DICER1/TREM2/DAG1/S100A9/NR1D1/TLR4/SKI/B4GALT5/ROR1/S100A8/TSPAN2/CDK6/PSEN1
SC	GOBP_NEGATIVE_REGULATION_OF_PROTEIN_SERINE_THREONINE_KINASE_ACTIVITY	114	0.529665	3.19392	0.00215983	0.00887008	CAV1/CDKN1C/GSTP1/CDKN2B/PRKAR2B/UCHL1/CDKN2C/STK38/SMPD1/AIDA/INPP5K/PKIG/DNAJA1/FBXO7/PPP1R1B/CEBPA/PYCARD/SFRP1/PTEN/LATS2/ADIPOQ/TESK1/ABL1/DTNBP1/PRKAR1A/HEXIM2/PPARG/GBA/CDK5RAP3/NR2F2/HYAL2/HEXIM1/SPRY1/SFRP2/GADD45A/RASIP1/CDKN2D/HEG1/APOE/SH2B3/BMP4/LRP5/PDCD4/SPRY2/AKT1/CDK5RAP2/PRKAR2A/DUSP1/PTPN6/IPO5/CDKN1B/RGS2/RB1/HIPK3/PTPN1/BMP2/CDKN1A/SIRT1/CASP3/SPRY4/AGT/PRKAR1B/DUSP16/MEN1/TN…
SC	GOBP_POSITIVE_REGULATION_OF_PROTEIN_SECRETION	127	0.327795	2.0198	0.00217391	0.00887008	SERP1/TMED10/PPP3CB/GLUD1/SRI/VPS35/MYH10/RBP4/ANG/MPC2/BAD/HLA-DRB1/PPIA/HCAR2/IGF1/ARF6/GLUL/WLS/NNAT/GOLPH3/SOX4/IER3IP1/GPER1/OXCT1/PPARG/EXOC1/NR1H2/TCF7L2/EZR/PCK2/PARD6A/OSBP/MYOM1/ACSL4/BMP6/STX4/TREM2/DNM1L/PTPN23/APBB1/UNC13B/APBB3/IRS2/PPID/LRRC8A/TLR4/GOLPH3L/VEGFC
SC	GOBP_PROTEIN_DNA_COMPLEX_ASSEMBLY	127	0.339264	2.09046	0.00217391	0.00887008	HMGB1/ANP32B/NAP1L4/PIH1D1/ATRX/DAXX/TAF9/NPM1/CENPW/TAF7/TAF12/POLE3/TCF4/RRN3/POLR1E/GTF2A2/MIS18A/DNAJC9/SART3/BAZ1A/TAF11/ASF1A/RSF1/NAP1L1/GMNN/TAF3/GTF2H5/TAF10/GTF2B/BRF2/HMGB2/SMYD3/TSPYL1/THRA/BRD2/CENPT/SET/ITGB3BP/TSPYL4/NAP1L5/TAF13/TSPYL2/RB1/CENPO/TAF1C/TBP/BDP1/UBTF/SMARCA5/CHAF1A/TSPYL5/TAF6L
SC	GOBP_REGULATION_OF_GENERATION_OF_PRECURSOR_METABOLITES_AND_ENERGY	127	0.450601	2.7765	0.00217391	0.00887008	VCP/GHITM/CHCHD2/PHB2/COX7A2L/PINK1/ISCU/EIF6/GPD1/RHOA/COX7A2/DNAJC15/CISD1/PRELID1/PARK7/UQCC2/INPP5K/SORBS1/NDUFA4/NUPR1/PPIF/JMJD8/IGF1/PPP1CA/TREX1/COX7A1/ARL2/ZBTB20/IL10RB/PGAM1/POMC/BNIP3/PPP1CB/PRKAG1/DDIT4/AK4/MLXIPL/COX17/OGT/SHMT2/TRAP1/PHLDA2/NOA1/CCNB1/APP/FBP1/ZBTB7A/AKT1/INSR/EPM2AIP1/TACO1/KHK/IGF2/STAT3/PIK3CA/GIT1/IRS2/SLC25A12/MYC/DYRK2/SNCA/SIRT6/PPP1R3C
SC	GOBP_PHOTOTRANSDUCTION	48	-0.418048	-1.84076	0.00218023	0.00887008	SLC24A4/CABP4/SAG/RP1/RGR/SLC24A2/PDE6B/AIPL1/CNGB1/GRK4/GRK7/ABCA4/PITPNM1/TRPC3/RHO/NR2E3/RS1/RCVRN/OPN5/GNAT1/OPN1SW/OPN4/GRK1/GUCY2D/PDE6C/GNGT1/GUCY2F/PLEKHB1/ASIC2/RRH
SC	GOBP_REGULATION_OF_CELLULAR_RESPONSE_TO_TRANSFORMING_GROWTH_FACTOR_BETA_STIMULUS	129	0.414856	2.55376	0.00218818	0.00887008	HSP90AB1/HTRA1/STRAP/CAV1/CDKN1C/SNW1/PMEPA1/HSPA5/CDKN2B/SNX6/CAV2/STUB1/FKBP1A/DAB2/TGFBR3/ING2/CIDEA/FBN1/SDCBP/HSPA1A/SMAD3/C20orf27/TRIM33/LATS2/CITED2/ENG/GLG1/FAM89B/HTRA3/LOX/PPARG/HIPK2/PPM1A/GIPC1/BAMBI/THBS1/SPRY1/ZEB1/PIN1/ZBTB7A/SPRY2/LTBP4/SMURF1/VASN/ZEB2/EMILIN1/TGFB1I1/SPRED2/EID2/ASPN/BMP2/ZNF703/SIRT1/SKI
SC	GOBP_PROTON_TRANSMEMBRANE_TRANSPORT	129	0.438928	2.70194	0.00218818	0.00887008	ATP6V0E1/COX4I1/UQCRH/COX6A1/STOML2/PHB2/UQCRFS1/COX6B1/COX8A/COX5B/COX7A2L/COX5A/ATP6V1G1/ATP6V1E1/SLC25A5/UQCRC1/ATP6V1F/SURF1/UQCR10/RNASEK/PARK7/SLC25A3/NDUFA4/TMSB4X/SLC9A9/CYC1/PPIF/UCP2/COX7A1/SLC25A4/MT-CO3/SLC9A3R1/MT-CYB/ATP6V0C/TWIST1/CYB5A/MT-ATP6/ACTN4/MFSD3/COX4I2/COX17/MT-CO1/MT-CO2/CTNS/DNAJC30/MT-ND4/ATP6V1H/NDUFS7/ATP6V0E2/ATP6V0D1/COX7B/MT-ATP8/ATP6V1B2/TCIRG1/CHP1/MT-ND5/ATP1A…
SC	GOBP_VIRAL_GENOME_REPLICATION	129	0.48712	2.9986	0.00218818	0.00887008	VCP/PHB/HSPA8/HTATSF1/PPIH/SRPK2/VAPA/BANF1/TNIP1/PCBP1/STAU1/LAMTOR5/TOP2B/PPIA/INPP5K/PCBP2/RAB5A/IFITM3/PABPC1/PPIB/BST2/IFI27/ATG5/TRIM28/IFITM2/EEA1/NUCKS1/MPHOSPH8/DEK/GAS6/IFITM1/STOM/CNOT7/CTBP1/LARP1/ISG15/APOBEC3C/SRPK1/ZBED1/IFI16/ILF3/CCNK/EIF2AK4/PLSCR1/KPNA6/BCL2/PPIE/N4BP1/ZC3HAV1/IFIT1/ROCK2/RAD23A/VAPB/IFIT5/NOTCH1/PPID/PKN2/FMR1/IFIH1/CDC42/TMEM39A/PI4KA/CCL2/ZNFX1/CTBP2/SLPI/PA…
SC	GOBP_POSITIVE_REGULATION_OF_PROTEOLYSIS_INVOLVED_IN_CELLULAR_PROTEIN_CATABOLIC_PROCESS	129	0.498408	3.06808	0.00218818	0.00887008	VCP/BCAP31/CAV1/PSMC2/GABARAP/PSMC5/RBX1/MAGEF1/PSMC3/CLU/PSMC4/RNF185/SUMO1/PSMC1/DDRGK1/RACK1/PSMD10/NFE2L2/STUB1/ZFAND2A/NUPR1/HSPBP1/HERPUD1/DAB2/KEAP1/HECTD1/CEBPA/RNF139/BAG6/TMEM259/HSPA1A/RNF40/ECSCR/CSNK1A1/PTEN/MKRN2/UBQLN2/PIAS1/SUMO2/CCDC22/GBA/UBQLN1/CDK5RAP3/TRIB2/LAPTM5/BBS7/USP5/ZER1/DNAJB2/FBXW7/CSNK1E/SGTA/RNF19A/AKT1/DVL1/ANKIB1/TRIB1/RAD23A/RCHY1/SMURF1/TREM2/RGN/FMR1/RNF180/S…
SC	GOBP_PEPTIDYL_LYSINE_METHYLATION	130	0.321915	1.98518	0.00220264	0.00887008	NELFE/TRMT112/SNW1/PWP1/WDR61/DPY30/PIH1D1/MCRS1/IWS1/ATRX/EEF1AKMT1/ARID4A/LMNA/KMT2E/SMYD2/RTF1/CTR9/PHF1/NNMT/SETD6/WDR5/KMT5B/KDM1A/SETD5/OGT/SMYD3/PHF20/NFYB/EEF2KMT/PAGR1/KMT2C/HCFC1/METTL18/SETMAR/SETD3/MTF2/CXXC1/BRD4/PYGO2/RLF/CTNNB1/SMYD5/VCPKMT/SIRT1/KANSL2/SETD2/ARID4B/CAMKMT/NFYC/EZH1/MEN1/SUV39H1/PHF19/NFYA/N6AMT1/TTLL12/ASH1L/WDR82
SC	GOBP_VESICLE_MEDIATED_TRANSPORT_TO_THE_PLASMA_MEMBRANE	130	0.470551	2.90179	0.00220264	0.00887008	VAMP3/RAB10/OPTN/RAB7A/SNX17/ATP9A/GOLGA4/VPS35/GOPC/SPTBN1/RABEP1/VAMP5/VPS51/RACK1/SNX3/RAB11A/RAB34/VPS29/GOLGA7/RAB31/ARL3/WASH3P/SNX12/EHD2/VPS39/COMMD1/ARF6/GOLPH3/EHD1/ACSL3/VAMP4/STX6/CCDC22/EXOC1/RAB14/RAB13/SEC16A/ARFRP1/CMTM6/RAB11B/ATP6AP1/PKDCC/SYS1/EXOC2/VPS26A/CNST/ZDHHC2/ATP2C1/VPS52/SNF8/ARHGAP1/EXOC6B/EHD4/MACF1/SNX4/EXOC4/PTPN23/VAMP2/CSK/GOLPH3L/CCDC93/RAB8A/CLSTN1/RAB35/DENND…
SC	GOBP_ERYTHROCYTE_HOMEOSTASIS	130	0.490345	3.02385	0.00220264	0.00887008	CEBPG/SMAP1/PRDX1/TMEM14C/SLC25A5/RBFOX2/STAT1/RPS6/RPS19/ARID4A/B2M/KMT2E/EPAS1/MAFB/UBA5/FAM210B/LYAR/TGFBR3/HSPA1A/BPGM/BCL6/CITED2/RPS17/ALAS1/UFL1/ZFP36L1/SLC25A38/DMTN/MAPK14/RPS14/ISG15/HIPK2/CDK5RAP3/ADGRF5/RPS24/FOXO3/PRKDC/HMGB2/HOXA5/STAT5B/HCLS1/THRA/AXL/KLF2/SH2B3/ID2/BMP4/ZBTB7A/DNASE2/PRMT1/GPI/HSPA9/ETV2/RB1/LDB1/STAT3/ACVR2A/KLF13/HMOX1/SMAD5/CASP3/HOXB6/SRF/ACIN1/ZFP36/P4HTM/G6P…
SC	GOBP_T_CELL_RECEPTOR_SIGNALING_PATHWAY	124	0.352044	2.15212	0.00220751	0.00887008	STOML2/RFTN1/CD81/PHPT1/FYN/RBCK1/HLA-DRB1/HLA-A/HLA-DPB1/RPS3/EIF2B1/HRAS/EIF2B3/UBE2N/KHDRBS1/LGALS3/HLA-DQB1/EIF2B5/THY1/ABL1/WNK1/NECTIN2/MAP3K7/ELF1/LAPTM5/RELA/ADA/THEMIS2/EZR/DUSP22/CRKL/EIF2B2/GBP1/TNFRSF21/RIPK2/PTPN6/PRNP/BTN3A3/EIF2B4/IKBKG/CD276/PIK3CA/LCP2/BTNL9/CSK/RC3H1/CBLB/PTPRC/DENND1B/BCAR1/DUSP3/RNF31/PSEN1/BTN3A2/NFKBIZ/LILRB4/CD300A
SC	GOBP_GRANULOCYTE_CHEMOTAXIS	124	0.365541	2.23463	0.00220751	0.00887008	RARRES2/RAC1/BSG/ANXA1/CKLF/SRP54/PPIA/C1QBP/PPIB/CD74/MPP1/LGALS3/MDK/CSF1R/C3AR1/SAA1/CCL13/THBS4/GBF1/THBS1/CCL14/AKIRIN1/JAM3/LBP/CCL18/FCER1G/CSF1/ITGB2/BST1/RAC2/CCL3/CCL4/CMKLR1/DNM1L/TNFAIP6/S100A9/CCL19/EDN1/CXCL10/SLIT2/CCL2/MIR223/SYK/S100A8/CCL21/PPBP/CCL23/CCL8/ITGA1/PIP5K1C/DPP4/MCU/CXCL2/CXCL9/PREX1/S100A12/MAPK3/CCL26/PIKFYVE/CXCL1/JAML/PDE4B/CXCL11
SC	GOBP_NEGATIVE_REGULATION_OF_TRANSMEMBRANE_TRANSPORT	124	0.38689	2.36515	0.00220751	0.00887008	C4orf3/CAV1/ISCU/ARL6IP5/CALM1/PEA15/ADRA2A/SRI/SUMO1/OAZ1/YWHAE/GOPC/LEP/CALM2/INPP5K/GSTO1/FKBP1A/BIN1/VDAC1/PPIF/FABP5/PID1/COMMD1/CALM3/SLC9A3R1/OXSR1/TWIST1/SESTD1/UBQLN1/THBS1/CAB39/STK39/GSTM2/REM1/CRBN/PKD2/TRDN/AKT1/CAMK2D/FKBP1B/SLC30A1/RGS2/ATP1A2/CTTNBP2NL/IRS2/FMR1/NEDD4L/APPL2/KCNAB1/SLC43A1/MYC/MMP9/SIRT6/PLN/GEM/RRAD
SC	GOBP_PROTEIN_TARGETING_TO_MEMBRANE	124	0.522254	3.19265	0.00220751	0.00887008	CIB1/PEX19/ITGB1BP1/SEC61B/SRP14/NACA/MFF/SIL1/RABGEF1/HSPA5/FIS1/SRP72/FYN/SEC61A1/SEC62/MYO1C/SRP54/ZFAND2B/INPP5K/ZDHHC3/TRAM1/ATG3/GOLGA7/SEC61G/SSR3/SRP68/HRAS/ZDHHC12/ZDHHC4/SDCBP/UBL4A/BAG6/SRP9/GET4/SEC63/ZDHHC6/VPS37A/ZDHHC7/STOM/PARD3/DMTN/CDK5/ARL6IP1/SRPRA/ZDHHC9/CHMP4A/SSR2/RAB8B/GDI1/CHMP4B/PEX16/ICMT/PEX3/ZDHHC2/ZDHHC1/SGTA/AQP11/YIF1B/ZDHHC18/RTP4/TCAF1/ITGB2/SSR1/PRNP/CHP1
SC	GOBP_NEUTROPHIL_MIGRATION	125	0.359924	2.20139	0.00221239	0.00887008	CD99/JAGN1/RAC1/BSG/XG/CD99L2/CKLF/SRP54/PPIA/WDR1/C1QBP/PPIB/CD74/RHOG/MPP1/LGALS3/PECAM1/MDK/C3AR1/SAA1/CCL13/THBS4/GBF1/CCL14/IL1R1/JAM3/LBP/CCL18/FCER1G/ITGB2/BST1/RAC2/CCL3/CCL4/SLAMF8/MYD88/DNM1L/TNFAIP6/S100A9/CCL19/EDN1/CXCL10/SLIT2/CCL2/MIR223/SYK/S100A8/CCL21/PPBP/CCL23/CCL8/ITGA1/PIP5K1C/DPP4/MCU/CXCL2/CXCL9/PREX1/S100A12/CCL26/PIKFYVE
SC	GOBP_NEUTRAL_LIPID_METABOLIC_PROCESS	128	0.296722	1.8202	0.00222222	0.00887008	GPX1/CAV1/THRSP/LPL/ACSL1/NR1H3/ANG/DGAT1/DGAT2/GPAM/CAT/PNPLA2/INSIG1/MGLL/CTDNEP1/C3/ABHD16A/ABHD12/PNPLA4/ABHD6/PTPN11/GPIHBP1/LIPE/NR1H2/TNXB/FAAH/SEL1L/ABHD5/PCK1/LYPLA2/APOE/FBXW7/PCK2/APOC1/LPIN2/TBL1XR1/AADAC/MBOAT7/SCARB1/LMF1/SREBF1/LPGAT1/RGN/SIRT1
SC	GOBP_REGULATION_OF_CELLULAR_KETONE_METABOLIC_PROCESS	128	0.349586	2.14449	0.00222222	0.00887008	AKR1C3/ACADVL/ATP2B4/CAV1/EIF6/NR1H3/CES1/ANXA1/BCKDK/PARK7/DGAT2/PDK2/INSIG1/ELOVL5/FABP5/DAB2/CD74/TREX1/ADM/TWIST1/ADIPOQ/REST/PPARG/MLXIPL/LONP2/NR1H2/ERLIN1/AVP/TYSND1/SCAP/PDK4/APOC1/AKT1/ABCD2/BMP6/BMP2/SREBF1/LPGAT1/H6PD/IRS2/NR1D1/RGN/SIRT1/APPL2/ACACB/NCOR2/FABP3/PIBF1/SNCA/EGR1/ERLIN2
SC	GOBP_NEGATIVE_REGULATION_OF_CANONICAL_WNT_SIGNALING_PATHWAY	132	0.363905	2.2549	0.00222222	0.00887008	CAV1/GPC3/SDHAF2/FZD4/MESP1/RBX1/PFDN5/DDIT3/TLE1/CBY1/FOXO1/CTNNBIP1/DAB2/OTUD5/IGFBP4/SLC9A3R1/SFRP1/CSNK1A1/LZTS2/IGFBP6/MDK/LATS2/SFRP4/MAPK14/TMEM88/JADE1/SIAH2/CTHRC1/WWTR1/FOXO3/EMD/SFRP2/G3BP1/TCF7L2/APOE/MAD2L2/CTNND1/SCYL2/SOX17/TMEM64/FRZB/NOTCH1/TLE3/CTNNB1/BMP2/WNT11/RUVBL2/UBAC2/TLE2/BICC1/FZD6/TPBG/SNAI2
SC	GOBP_NEGATIVE_REGULATION_OF_TRANSMEMBRANE_RECEPTOR_PROTEIN_SERINE_THREONINE_KINASE_SIGNALING_PATHWAY	128	0.378558	2.32221	0.00222222	0.00887008	HTRA1/STRAP/CAV1/UBE2D3/PMEPA1/HSPA5/SNX6/CAV2/STUB1/FKBP1A/FSTL3/TGFBR3/CHRDL1/CIDEA/FBN1/HSPA1A/SFRP1/TRIM33/FST/GLG1/NBL1/ABL1/UBE2D1/FAM89B/HTRA3/LRP1/PPARG/HIPK2/PPM1A/BAMBI/SPRY1/SFRP2/RBPMS2/NOMO1/CILP/TOB1/PIN1/ZBTB7A/SPRY2/CRIM1/SMURF1/LEMD2/VASN/EMILIN1/TGFB1I1/NOTCH1/SPRED2/EID2/ASPN/TNFAIP6/BMP2/SIRT1/SKI
SC	GOBP_NUCLEOSIDE_DIPHOSPHATE_METABOLIC_PROCESS	128	0.396099	2.42981	0.00222222	0.00887008	NME4/NUDT5/ENO1/EIF6/GPD1/PGK1/ALDOA/PGM1/NME2/TPI1/AK2/NME3/PFKFB1/GUK1/BAD/NME1/LDHA/GAPDH/NUPR1/JMJD8/IGF1/AK3/ALDOC/TREX1/ARL2/MPP1/ZBTB20/BPGM/PGAM1/PKM/CMPK1/PRKAG1/AK1/HK1/DDIT4/AK4/MLXIPL/NUDT7/OGT/NUDT18/OGDH/DTYMK/GALK1/PFKL/APP/FBP1/PGAM2/NT5E/ZBTB7A/RRM1/INSR/GPI/NUDT16/NME5/PFKP/STAT3/GIT1/ADPGK/ENTPD6/MYC/TJP2/SIRT6
SC	GOBP_TELOMERE_ORGANIZATION	132	0.410026	2.54068	0.00222222	0.00887008	CCT5/XRCC6/TCP1/APEX1/XRCC5/HSP90AB1/HSP90AA1/RPA1/CCT7/CCT8/CCT6A/CCT4/PTGES3/HNRNPD/RPA3/TERF2IP/HNRNPC/ATRX/PCNA/NHP2/PARP3/RPA2/NOP10/TEN1/GNL3/CCT3/PARP1/HNRNPA1/TNKS1BP1/NBN/PINX1/DKC1/USP7/SMG5/XRCC1/TFIP11/FEN1/HNRNPU/PRKDC/CCT2/NABP2/HNRNPA2B1/ERCC1/UPF1/GAR1/ACD/PNKP/RAD50/TPRKB/RFC1/TNKS2/NEK7/CTNNB1/EXOSC10/TELO2/SLX1A/PPP1R10/MYC/HMBOX1/SIRT6/EZH1/WRAP53/MAP3K4
SC	GOBP_TELOMERE_MAINTENANCE	128	0.415245	2.54727	0.00222222	0.00887008	CCT5/XRCC6/TCP1/APEX1/XRCC5/HSP90AB1/HSP90AA1/RPA1/CCT7/CCT8/CCT6A/CCT4/PTGES3/HNRNPD/RPA3/TERF2IP/HNRNPC/ATRX/PCNA/NHP2/PARP3/RPA2/NOP10/TEN1/GNL3/CCT3/PARP1/HNRNPA1/TNKS1BP1/NBN/PINX1/DKC1/USP7/SMG5/XRCC1/TFIP11/FEN1/HNRNPU/PRKDC/CCT2/NABP2/HNRNPA2B1/ERCC1/UPF1/GAR1/ACD/PNKP/RAD50/TPRKB/RFC1/TNKS2/NEK7/CTNNB1/EXOSC10/TELO2/SLX1A/PPP1R10/MYC/HMBOX1/SIRT6/WRAP53/MAP3K4
SC	GOBP_REGULATION_OF_PROTEASOMAL_UBIQUITIN_DEPENDENT_PROTEIN_CATABOLIC_PROCESS	132	0.545501	3.38014	0.00222222	0.00887008	VCP/HSP90AB1/BCAP31/CAV1/GABARAP/UBXN1/RBX1/EIF3H/CLU/SUMO1/GNA12/DDRGK1/PARK7/RACK1/PSMD10/CAMLG/ARAF/NFE2L2/TAF9/STUB1/ZFAND2A/HSPBP1/HERPUD1/DAB2/KEAP1/HECTD1/RPL11/UCHL5/WAC/COMMD1/UBE2K/CEBPA/SDCBP/BAG6/HSPA1A/CSNK1A1/MKRN2/UBQLN2/PIAS1/UFL1/SUMO2/GBA/USP7/UBQLN1/TRIB2/GIPC1/BBS7/OGT/USP5/BAG5/RAD23B/SMARCC1/ZER1/DNAJB2/CSNK1E/SGTA/N4BP1/RNF19A/AKT1/DVL1/MAP1A/ANKIB1/TRIM39/USP14/TRIB1/RAD23…
SC	GOBP_ENDOPLASMIC_RETICULUM_TO_GOLGI_VESICLE_MEDIATED_TRANSPORT	132	0.567202	3.5146	0.00222222	0.00887008	RAB2A/VCP/KDELR2/ARF4/BCAP31/TEX261/TMED10/YKT6/PEF1/PREB/TFG/LMAN2/PPP6C/RANGRF/TRAPPC2L/VAPA/GOPC/YIF1A/COPG1/SEC13/COPE/TRAPPC1/LMAN2L/TMED1/TRAPPC6A/RAB1A/KDELR3/SAR1A/INSIG1/NRBP2/RNF139/STX18/TRAPPC3/COPB1/USO1/COPA/VAMP7/LMAN1/SEC31A/KLHL12/VAMP4/IER3IP1/PDCD6/YIPF5/CNIH4/RAB1B/COPG2/BCAP29/ARCN1/SEC16A/GBF1/ERGIC3/STX5/TMED7/TMED2/SCAP/GAS1/YIF1B/CUL3/TRAPPC5/VAPB/SEC24C/SEC24B/CREB3L2/ZW…
SC	GOBP_POSITIVE_REGULATION_OF_PROTEIN_MODIFICATION_BY_SMALL_PROTEIN_CONJUGATION_OR_REMOVAL	132	0.575024	3.56308	0.00222222	0.00887008	VCP/UBE2L3/NDFIP1/WFS1/UBE2V1/CAV1/UBB/PINK1/PTTG1IP/PEF1/GABARAP/SKP1/HSPA5/RBX1/MUL1/RNF20/TNIP1/MYCBP2/SAE1/PSMD10/STUB1/FKBP1A/DERL1/GNL3/UBA2/HSPBP1/RPS2/RWDD3/COMMD1/UBE2N/TOLLIP/CTR9/PHF23/BIRC2/RNF40/AIMP2/NMI/SART3/HUWE1/PTEN/HDAC3/PIAS1/UBE2D1/PDCD6/WDR48/CDK9/UBQLN1/CDK5RAP3/KDM1A/TOPORS/LAPTM5/UBE3A/UBE2V2/DCUN1D4/BMI1/PIAS4/FBXW7/PIN1/SPRTN/ANGPT1/FBXO33/CUL3/TANK/RIPK2/RCHY1/DCUN1D5…
SC	GOBP_PHOSPHATIDYLINOSITOL_BIOSYNTHETIC_PROCESS	131	0.317757	1.95862	0.00222717	0.00887008	DPM3/PI4KB/INPP5K/CDIPT/GPAA1/PIGF/IP6K2/PIGC/PIGZ/MTMR3/DPM2/INPP1/PTEN/PIGU/PIP4K2B/PI4K2A/IP6K1/DPM1/PIGV/FIG4/MTMR2/TMEM150A/PIGK/PIGS/PIP4K2A/OCRL/PIK3R1/PGAP2/VAC14/MBOAT7/UVRAG/EFR3A/SACM1L/INPPL1/PGAP3/PIK3CA/SOCS2/BECN1/PIK3R4/ITPKC/MTM1/MTMR6/PI4KA/SOCS1/MPPE1/PDGFB/FGF2/PIP5K1B/BMX/HTR2B/SOCS3/PIGM/PI4K2B/PIP5K1C/PIP4K2C/PIGT/PIKFYVE/SOCS5/PIGH/PI4KAP1
SC	GOBP_PLATELET_ACTIVATION	131	0.325559	2.00671	0.00222717	0.00887008	GNAS/FUNDC2/CLIC1/ADRA2A/C1GALT1C1/MYL12A/COL3A1/ILK/HSPB1/ACTB/PPIA/MYL9/MYH9/ACTN1/ACTG1/VCL/VWF/BLOC1S4/TLN1/DMTN/MAPK14/SAA1/FIBP/FLNA/CD9/PLSCR1/FN1/AXL/IL6ST/CTSG/APOE/GNA13/STXBP1/SH2B3/PLEK/FERMT3/FCER1G/CSRP1/C1QTNF1/PTPN6/SELP/PIK3CA/TLR4/PEAR1/FZD6/THBD/ADAMTS18/HBB/P2RY12/SRF/GP1BB/METAP1/PDGFRA/PDGFB/SYK/CD40/JAK2
SC	GOBP_MEMBRANE_INVAGINATION	131	0.348203	2.14629	0.00222717	0.00887008	CD36/CHMP2A/RHOA/RAC1/SNX9/ARF1/GSN/SNX3/MYH9/RAB31/AIF1/RHOG/C3/VAMP7/CHMP4A/TRDC/THBS1/TRBC2/RHOBTB1/SNX33/TRBC1/ITGB2/XKR8/MARCO/IGKC/SMURF1/RAC2/FNBP1L/ARHGAP12/HGS/TREM2/IGLC3/ABCA1/IGLC2/BECN1/SNX18/APPL2/CDC42/IGLC1/MFGE8/ANO6/IGHA1/SPIRE1/IGLL5/IGHM/DOCK1/ITGAM/CD300A/CLCN3/FCGR2B/FCGR1A/IGHG1/IGHG2/ARHGAP25
SC	GOBP_DETOXIFICATION	131	0.454172	2.79947	0.00222717	0.00887008	SOD1/GPX1/PRDX6/CD36/PXDN/PRDX1/ESD/GPX4/GSTP1/MGST2/TXNDC17/PRDX4/PRDX5/MGST1/FBLN5/PRDX2/MGST3/ADH5/PARK7/NQO1/TXN/NFE2L2/ALDH1A1/GSTK1/CCS/CAT/GSTO1/PRDX3/ALOX5AP/GPX7/SOD3/GPX3/GLRX/OSCP1/LTC4S/SESN1/H19/CYGB/AKR1A1/GSTM3/SESN2/GSTM2/RDH11/MT1X/APOE/MT1F/PIM1/TXNRD3/ABCB6/APOM/SLC30A1/RALBP1/S100A9/MT1M/TP53INP1/SRXN1/MT2A/HBB/MT1E/HBA2/GPX8/TXNRD1/HBA1/HBM/PTGES/GSTM1/MT1DP/CLIC2/MT1A/DHFR/H…
SC	GOBP_REGULATION_OF_PROTEIN_LOCALIZATION_TO_NUCLEUS	131	0.523656	3.22776	0.00222717	0.00887008	CTNNA1/CCT5/TCP1/CD36/HSP90AB1/LARP7/CCT7/SUMO3/CCT8/CCT6A/CCT4/RAN/FYN/SUMO1/MCRS1/LEP/PARK7/APOD/LAMTOR5/LMNA/PKIG/FERMT2/MEPCE/TRIM28/MDFIC/CCT3/GLUL/ORMDL3/SMAD3/PARP1/LZTS2/HDAC3/LATS2/TESK1/BAG3/MAPK14/PINX1/RBM22/DKC1/DMAP1/CDK5RAP3/HYAL2/WWTR1/FLNA/TARDBP/CCT2/TPR/SESN2/YAP1/HCLS1/PIK3R1/PIN1/JUP/BMP4/BYSL/ANGPT1/AKT1/NUP54/UFM1/NOLC1/IPO5/CHP1
SC	GOBP_REGULATION_OF_DEPHOSPHORYLATION	126	0.535123	3.26834	0.00225225	0.00887008	HSP90B1/HSP90AB1/YWHAB/PPP2R5A/PINK1/CSNK2B/PPP1R7/CALM1/BOD1/PPP1R11/PPP2R3C/IGBP1/YWHAE/GNA12/CRY2/CAMTA1/CALM2/SMPD1/PPIA/INPP5K/FKBP1A/TIPRL/ARPP19/PPP1R1B/CALM3/MTMR3/URI1/LGALS3/IQGAP1/SMAD3/PDGFRB/DLC1/GNAI2/PTBP1/SMG7/BAG4/STYXL1/GBA/CDH5/CDK5RAP3/MTMR2/SMG5/PPP1R12A/PPP1R35/PPP6R3/ROCK1/SWAP70/PPP2R5D/SLC39A10/PIN1/PLEK/PPP1R36/PPP6R2/PPP1R8/MEF2C/ROCK2/PPP1R16A/FKBP1B/CHP1/NUAK1/MGAT5/M…
SC	GOBP_POSITIVE_REGULATION_OF_APOPTOTIC_SIGNALING_PATHWAY	126	0.539961	3.29789	0.00225225	0.00887008	CTNNA1/SOD1/BCAP31/CAV1/UBB/PPP2R1B/BOK/FIS1/PEA15/HTRA2/TIMP3/DDIT3/PDIA3/PPP2R1A/RBCK1/PARK7/BAD/RACK1/SRPX/RPS3/PRKRA/NUPR1/RPS7/SERINC3/G0S2/PPP1CA/SLC9A3R1/PYCARD/EEF1E1/SFRP1/PTEN/PLEKHF1/GPER1/INHBB/FADD/STYXL1/SFPQ/TNFSF12/ITM2C/HYAL2/CTSH/RPL26/THBS1/TNFSF10/EIF5A/WWOX/TGFBR1/PIAS4/BCLAF1/FBXW7/TRAF7/TRIM39/RIPK1/NCK1/MCL1/TNFRSF12A/SIAH1/NACC2/DNM1L/S100A9/BECN1/MSX1/SIRT1/AGT/PTPRC/BID…
SC	GOBP_NUCLEUS_ORGANIZATION	133	0.416574	2.57403	0.00226244	0.00887008	CHMP3/RTN4/CHMP2A/SRPK2/EMG1/SERBP1/NSFL1C/SUMO1/SF1/VPS4A/BANF1/TMEM43/NEK6/RPS19/CHMP2B/LMNA/DCTN1/BIN1/PITPNB/RRN3/CHMP1A/CTDNEP1/CHMP6/FAM118B/NDEL1/GPER1/HABP4/CHMP5/NECTIN2/HIPK2/SRPK1/CHMP4A/UBE2I/REEP3/EMD/CHMP7/TARDBP/PDCD6IP/SUN2/HMGB2/TPR/PAFAH1B1/CHMP4B/TBPL1/VRK1/SUN1/REEP4/NUP54/NUP153/NOLC1/USP36/PLEC/LEMD2/PYGO2/NUMA1/SIRT1/AKAP8L/USPL1/NDC1/TOR1B/RRP8/DMPK/AHCTF1/WRAP53/SUV39H1/U…
SC	GOBP_STEROID_HORMONE_MEDIATED_SIGNALING_PATHWAY	133	0.450133	2.78139	0.00226244	0.00887008	NR3C1/PHB2/PHB/PTGES3/RHOA/PLPP1/PMEPA1/UFSP2/PGRMC2/PRMT2/RBFOX2/DDX5/DDRGK1/RWDD1/NCOA4/YWHAH/CRY2/PARK7/DAXX/RHOXF1/DDX17/UBA5/TAF7/RXRB/DAB2/AR/EGLN2/SFRP1/PARP1/WBP2/UFL1/GPER1/ZMIZ1/CALR/SAFB/KDM1A/CLOCK/DDX54/CALCOCO1/UBE3A/YAP1/PAGR1/PAK1/LMO3/BMP4/FKBP4/RXRA/ZBTB7A/UFM1/PER1/CNOT2/ESRRA/NR1D1/CNOT1/SIRT1/CRY1/RNF6/NCOR2/VPS18
SC	GOBP_MACROMOLECULE_DEACYLATION	133	0.450942	2.78639	0.00226244	0.00887008	MORF4L1/C6orf89/NDN/PHB/PINK1/MORF4L2/PPT1/BEX4/KDM5A/SAP30BP/ING2/BRMS1/LYPLAL1/ABHD16A/BCL6/NIPBL/MBD2/NNMT/HDAC3/REST/ABHD12/CTBP1/SFPQ/ABHD13/WDR5/KAT14/MIER1/FLNA/SGF29/HDAC7/KAT2A/RBM14/ABHD10/MBIP/APLNR/LYPLA2/TBL1XR1/PPT2/PER1/CAMK2D/MSL3/HDAC11/HDAC5/SPRED2/RCOR3/FNTA/SREBF1/SIRT3/NEK3/SIRT1/SKI/AKAP8L/PRKD1/ZBTB7B/RRP8/CHD3/SIRT6/CCAR2/SUV39H1/CHD4/MIER3/HDAC1/FRY/SMARCAD1/PRKD2/ZNF541/…
SC	GOBP_POSITIVE_REGULATION_OF_AUTOPHAGY	133	0.475289	2.93683	0.00226244	0.00887008	HMGB1/SH3GLB1/PINK1/OPTN/BNIP3L/SLC25A5/PARK7/FOXO1/BAD/MTDH/RALB/TMEM59/VDAC1/FBXO7/WAC/DCN/SLC25A4/KAT5/ORMDL3/PLEKHF1/SCOC/UFL1/PIP4K2B/BAG3/SESN1/BNIP3/LARP1/MAP3K7/ADRB2/ATF6/FOXO3/SUPT5H/HSPB8/ROCK1/SESN2/ENDOG/PIP4K2A/PLK2/MOAP1/TPCN1/TRIM32/FYCO1/MID2/NPRL2/RIPK2/WIPI1/SESN3/TRIM21/UVRAG/TRIM27/NPRL3/SNX4/SH3BP4/RAB3GAP1/IKBKG/KDR/SNX7/HTT/BECN1/TICAM1/SNX18/TP53INP2/TP53INP1/SIRT1/VPS13D…
SC	GOBP_INDOLE_CONTAINING_COMPOUND_METABOLIC_PROCESS	25	-0.494784	-1.83951	0.00228833	0.00887008	TPH1/KYNU/ATP7A/IDO2/AFMID/SRD5A1/ASMT/AANAT/IDO1/KMO/TPH2/DDC/SLC34A1/GRIN2A/PDE1B/BLOC1S6/HTR1A
SC	GOBP_REGULATION_OF_INSULIN_SECRETION	143	0.290191	1.82989	0.00230415	0.00887008	SERP1/JAGN1/NDUFAF2/PPP3CB/GLUD1/ADRA2A/SRI/RBP4/MPC2/LEP/HMGN3/BAD/HLA-DRB1/UQCC2/CDK16/UCP2/GLUL/NNAT/ICA1/SFRP1/PIM3/SOX4/REST/GPER1/HADH/INHBB/OXCT1/PTPN11/CLOCK/TCF7L2/PPP3CA/PFKL/PCK2/ACVR1C/LRP5/OSBP/KLF7/ACSL4/TCIRG1/FKBP1B/EFNA5/STX4/SREBF1/IRS2/NR1D1/LRRC8A
SC	GOBP_ESTABLISHMENT_OF_CELL_POLARITY	143	0.307394	1.93837	0.00230415	0.00887008	ITGB1/HSP90AB1/HSP90AA1/RAB10/RHOA/MAP1B/NSFL1C/GSN/MAP4/RACK1/FLOT2/CRK/DYNLT1/MYH9/DCTN1/CYTH3/ARF6/MSN/SLC9A3R1/AMOTL2/GOLPH3/PARD3/NDEL1/FAM89B/RAB11FIP2/CDH5/KANK1/GBF1/SPRY1/ROCK1/PAFAH1B1/EZR/AMOTL1/JAM3/CRKL/SPRY2/CDK5RAP2/MYO9A/ROCK2/PARD3B/FBXW11/FAT1/TCIRG1/ZW10/HES1/RAP2A/AMOT/NUMA1/CYTH1/HTT/SHTN1/CCL19/NEK3/CDC42/CYP26B1/GJA1/TCF15/FRMD4A/FGF10/UBXN2B/KIF25/CCL21/KRIT1
SC	GOBP_REGULATION_OF_MUSCLE_CELL_DIFFERENTIATION	143	0.313519	1.97699	0.00230415	0.00887008	YBX1/MORF4L2/YY1/MESP1/TOMM70/EFEMP2/XBP1/ANKRD17/IGF1/RBM4/HDAC3/ENG/MAPK14/PTBP1/CAMK1/GPER1/BHLHE41/CDK9/PIEZO1/KAT2A/RBPMS2/BCL2/ZEB1/PARP2/TRIM32/ID2/BMP4/NFATC3/PDCD4/MAML1/MEF2C/OLFM2/PI16/SETD3/RGS2/NOTCH1/HDAC5/IGF2/MTOR/BMP2/EFNB2/EDN1/MSX1/SIRT1/NFATC1/NFATC2/CYP26B1/SRF/SMAD1/RBM38/PDGFB/G6PD/DMPK/BMPR2
SC	GOBP_REGULATION_OF_LIPID_TRANSPORT	143	0.336099	2.11937	0.00230415	0.00887008	SURF4/ANXA2/CAV1/DBI/FIS1/TRIAP1/ACSL1/NR1H3/MIF/CES1/TSPO/LAMTOR1/PRELID1/EEPD1/NAXE/LEP/CRY2/NFKB1/PLTP/GPS2/DAB2/ADIPOQ/POMC/SCP2/LRP1/PTPN11/PPARG/OXT/TMEM30A/THBS1/ITGAV/NR1H2/FURIN/NFKBIA/ABCA5/APOE/APOC1/ACSL5/SREBF2/RXRA/AKT1/C1QTNF1/ARV1/BMP6/SPP1/TREM2/ABCA1/IRS2/EDN1/SIRT1/CRY1/AGT/FABP3/ZDHHC8/SYK/AGTR1/PTGES/LPCAT3/NUS1/GDF9/PLA2G4A/LDLRAP1/SEC24A
SC	GOBP_POSITIVE_REGULATION_OF_CYSTEINE_TYPE_ENDOPEPTIDASE_ACTIVITY	143	0.383373	2.41747	0.00230415	0.00887008	VCP/PDCD5/HMGB1/BEX3/NDUFA13/BCAP31/ANP32B/BOK/RHOA/ARL6IP5/MTCH1/DAP/HSPD1/FIS1/IFT57/HTRA2/FYN/MUL1/GSN/ASPH/BAD/FAM162A/RACK1/RPS3/PDCD2/CASP1/PERP/SMAD3/CASP4/PYCARD/HSPE1/CTSD/DLC1/REST/PDCD6/GPER1/FADD/PPARG/CIDEB/CTSH/LAPTM5/IFI16/TNFSF10/HSF1/ACVR1C/UACA/RIPK2/CYCS/S100A9/SIRT1/MAP3K5/BID/MYC/LGALS9/AIFM1/SNCA/SYK/S100A8/RPS27L/BCL2L13/JAK2/TBC1D10A/ST20/DIABLO/NOD1/LGMN/CRADD
SC	GOBP_RNA_PHOSPHODIESTER_BOND_HYDROLYSIS	143	0.419326	2.64418	0.00230415	0.00887008	APEX1/REXO2/NCBP2/EXOSC4/POP7/POLR2I/SND1/ANG/RNASEK/CPSF3/RNASE4/RNASE1/XRN2/POP5/FIP1L1/NHP2/ERI3/RPP21/DROSHA/RIDA/POP4/NOB1/YBEY/CNOT8/ABT1/EXOSC5/RNASE6/CNOT7/TSEN34/RNASET2/RPP40/ELAC2/FEN1/KHNYN/RRP36/LACTB2/CPSF7/CPSF1/ENDOG/USB1/RPS21/AZGP1/CSTF2T/TUT1/CSTF2/TOE1/EXOSC7/RPP25/EXOSC8/BOP1/N4BP1/PPP1R8/CNOT2/TBL3/PAN3/NUDT16/DICER1/EXOSC9/EXOSC10/RNASEH1/CNOT1/NUDT12/EXOSC3/RRS1/RPP38
SC	GOBP_BLOOD_VESSEL_ENDOTHELIAL_CELL_MIGRATION	143	0.498041	3.14055	0.00230415	0.00887008	CIB1/GPX1/ITGB1BP1/ITGB1/HMGB1/ATP2B4/CSNK2B/RHOA/STAT5A/ANXA1/HSPB1/PDCD10/NFE2L2/SRPX2/TMSB4X/MYH9/MMRN2/FGFR1/MAP2K5/CLEC14A/PRCP/MAPK14/ABL1/EFNA1/NRP1/PPARG/CDH5/THBS1/HDAC7/SP1/ID1/GADD45A/MAP3K3/PLK2/RGCC/APOE/FBXW7/JUP/ANGPT1/AKT1/MEF2C/MEOX2/STARD13/SCARB1/ACVRL1/SOX18/NOTCH1/AMOT/HDAC5/KDR/MAP2K3/KLF4/EFNB2/SIRT1/HMOX1/SLIT2/VEGFC/SRF/PRKD1/PDGFB/FGF2/RHOJ/CD40/NUS1
SC	GOBP_MAMMARY_GLAND_DEVELOPMENT	134	0.286176	1.77209	0.00231481	0.00887008	RTN4/GPX1/PHB2/CAV1/CDO1/SLC29A1/PAM/MTX1/MGMT/STAT5A/XBP1/APRT/NME1/CCND1/AR/TGFBR2/FASN/IGFBP5/CSF1R/MT-CO2/USF2/HOXA5/ARHGAP35/STAT5B/CEBPB/ID2/BMP4/LRP5/AKT1/CAPN1/CSF1/PYGO2/STAT6/SOCS2/IRS2/ZNF703/MSX1/NCOR2/BTRC/GJA1/GPAT4/DDR1/ZBTB7B/AREG/FGF10/FGF2/DEAF1/JAK2/NOTCH4/HK2
SC	GOBP_POSITIVE_REGULATION_OF_INNATE_IMMUNE_RESPONSE	134	0.295591	1.83039	0.00231481	0.00887008	XRCC6/AKIRIN2/XRCC5/HMGB1/HSP90AA1/FYN/PQBP1/RNF185/TOMM70/HLA-E/RPS19/UBE2K/NONO/PYCARD/NMI/LSM14A/FADD/NECTIN2/SFPQ/PSPC1/MAP3K7/TYROBP/DHX9/HEXIM1/IFI16/HLA-F/IFI35/PRKDC/HMGB2/PLSCR1/RBM14/STAT5B/LAMP1/LBP/PAK1/IRF7/ZCCHC3/POLR3F
SC	GOBP_SPINDLE_ASSEMBLY	134	0.30136	1.86611	0.00231481	0.00887008	CHMP3/POLDIP2/CHMP2A/TUBB/RHOA/BCCIP/DRG1/NEK6/MAPRE1/CHMP2B/RAB11A/RPS3/SMC3/CCDC69/KPNB1/OFD1/CHMP1A/CHMP6/HSPA1A/LZTS2/HDAC3/HAUS4/LSM14A/EML3/CHMP5/SAC3D1/CHMP4A/AAAS/CHMP7/FLNA/KIF3B/HNRNPU/PDCD6IP/TPR/CHMP4B/MLH1/HAUS7/MAP9/SMC1A/CEP63/HAUS1/NEK7/NUMA1/MAPRE2/KIF2A/STAG1/MZT1/GOLGA8A/PIBF1/CCDC61
SC	GOBP_RHO_PROTEIN_SIGNAL_TRANSDUCTION	134	0.390128	2.41579	0.00231481	0.00887008	ITGB1/RHOA/FLOT1/RAC1/ADRA2A/COL3A1/GNA12/CTNNAL1/PDCD10/ARHGDIB/COL1A2/TAX1BP3/KCTD10/CDC42EP2/CFL1/RHOG/EPS8/CDC42EP4/RHOD/BCL6/ARHGDIA/PDGFRB/DLC1/ABL1/NRP1/MYOC/KANK1/LPAR1/TNFAIP1/CDC42EP1/ROCK1/LPAR6/ARHGAP35/RASIP1/HEG1/RHOB/APOE/GNA13/RHOU/RASGRF2/ARHGAP1/NET1/CUL3/ROCK2/STARD13/ARHGAP4/RALBP1/ABCA1/SHTN1/MYO9B/CDC42SE1/CDC42/BCR/CDC42EP5/CDC42EP3/ARHGAP29/ARHGEF2/AKAP13/AGTR1/ARHGDIG/RHO…
SC	GOBP_REGULATION_OF_FAT_CELL_DIFFERENTIATION	134	0.430507	2.66583	0.00231481	0.00887008	RARRES2/ADIRF/LPL/CREBL2/DDIT3/LEP/XBP1/FOXO1/TFE3/CCDC3/LGALS12/FERMT2/INSIG1/GPS2/METRNL/CEBPA/SORT1/SMAD3/CCDC85B/SFRP1/ADIPOQ/ZFP36L1/SAV1/MAPK14/GPER1/ZFP36L2/PPARG/WWTR1/TRIB2/MEDAG/HNRNPU/SIX1/SFRP2/YAP1/ZBTB16/CEBPB/ID4/CCDC71L/LRP3/LMO3/ID2/LRP5/AKT1/PIM1/TMEM64/FRZB/CMKLR1/TGFB1I1/HES1/BMP2/ANKRD26/NR1D1/AAMDC/SIRT1/ASXL1/SNAI2/RUNX1T1/ZFP36/ZBTB7B
SC	GOBP_ENDOTHELIUM_DEVELOPMENT	134	0.526183	3.25828	0.00231481	0.00887008	GPX1/RBPJ/EDF1/FSTL1/RDX/CSNK2B/RHOA/MESP1/CLIC4/BTG1/RAB1A/COL15A1/EDNRB/ADD1/ADAMTS12/VCL/MSN/PECAM1/CLDN5/FASN/GJA4/TJP1/NRP1/RAB1B/ROBO4/CDH5/NR2F2/TNFRSF1A/CD34/PPP1R12A/PDE2A/SLC40A1/GSTM3/FGF1/ID1/ROCK1/EZR/HEG1/VEZF1/RHOB/ZEB1/S1PR1/RAPGEF1/CCM2/BMP4/COL18A1/EDNRA/ROCK2/SOX17/STARD13/CXCR4/ACVRL1/RAP1A/RAPGEF3/BMP6/HEY1/ETV2/SOX18/AFDN/NOTCH1/ATOH8/KDR/MYD88/CTNNB1/TMEM100/GJA5/CXCL10/MYA…
SC	GOBP_NEGATIVE_REGULATION_OF_NEURON_APOPTOTIC_PROCESS	142	0.308004	1.93747	0.00232019	0.00887008	SOD1/HSP90AB1/WFS1/PINK1/NTRK2/BOK/RHOA/SNX6/PPT1/GBE1/PARK7/HDGF/NRBP2/HRAS/GRN/NONO/MDK/DNAJC5/RASA1/NRP1/HIPK2/GBA/STAMBP/BCL2L1/ADNP/CNTFR/SIX1/ROCK1/BCL2/CEBPB/OXR1/AXL/IL6ST/APOE/CORO1A/STXBP1/ANGPT1/PCDHGC3/MEF2C/BTG2/SET/GPI/MAP2K4/ALKBH1/PIK3CA/JUN/HMOX1
SC	GOBP_B_CELL_DIFFERENTIATION	142	0.309332	1.94582	0.00232019	0.00887008	CEBPG/RBPJ/ITGB1/LGALS1/YY1/PPP2R3C/SLC25A5/XBP1/BAD/ITM2A/DOCK11/GPS2/CMTM7/IRF2BP2/KLF6/SYVN1/SFRP1/BCL6/ZFP36L1/ABL1/ZFP36L2/DNAJB9/ADA/PRKDC/MFNG/STAT5B/BCL2/TNFSF13B/IRF8/ID2/GPR183/PCID2/ZBTB7A/PTPN6/PLCL2/TCIRG1/NHEJ1/ST3GAL1/RABL3/HDAC5/SLAMF8/LRRC8A/ITFG2/BCL3/VCAM1/FNIP1/PTPRC/NOTCH2/CD79B/SYK
SC	GOBP_REGULATION_OF_JNK_CASCADE	138	0.289155	1.80399	0.00234192	0.00887008	HMGB1/MTURN/PINK1/ZNF622/GSTP1/AIDA/DNAJA1/GPS2/HRAS/TGFBR3/MDFIC/DIXDC1/SDCBP/MAP4K4/PYCARD/SFRP1/ZMYND11/HDAC3/EGFR/SIRPA/HIPK2/SFRP2/GADD45A/PAFAH1B1/PJA2/RB1CC1/TAOK3/MBIP/KLHL31/APP/DUSP22/PDCD4/RIPK1/RIPK2/PER1/GADD45G/RAP2A/HIPK3/MYD88/CCL19/TLR4/MAP3K5/CDC42/GADD45B/SH3RF1/DUSP16/MEN1/DUSP3/ULK4/CCL21/TRAF2/DAB2IP/NCOR1/AGER/NOD1/FCGR2B/TPD52L1/SH3RF3/AXIN1/SEMA3A/CD27/DUSP10
SC	GOBP_NEGATIVE_REGULATION_OF_EPITHELIAL_CELL_PROLIFERATION	138	0.362676	2.26267	0.00234192	0.00887008	SPARC/PHB2/CAV1/CDKN1C/SERPINF1/GPC3/IFT57/CDKN2B/NFIB/STAT1/CAV2/PDCD10/TNMD/B2M/NUPR1/DAB2/AR/RIDA/MMRN2/TGFBR3/AIMP1/IFT52/PTPRM/SFRP1/PTEN/SAV1/PPARG/NR2F2/LIMS2/THBS1/SFRP2/TGFBR1/RGCC/APOE/FBXW7/BMP4/AQP11/MEF2C/KLF9/ACVRL1/EAF2/CDKN1B/RB1/ATOH8/EFNB2/ATF2/RGN/SNAI2/SULF1/WDR13/CCL2/MTSS1/MEN1/CDK6/KRIT1/ALOX5/DAB2IP/PEX2/TINF2
SC	GOBP_CELLULAR_GLUCOSE_HOMEOSTASIS	141	0.366773	2.3025	0.00234192	0.00887008	GPX1/JAGN1/NDUFAF2/SERPINF1/SLC29A1/PPP3CB/ADRA2A/SRI/PIH1D1/MPC2/XBP1/HMGN3/FOXO1/BAD/HLA-DRB1/RACK1/CDK16/UCP2/ZBTB20/NUCKS1/GAS6/PIM3/SOX4/GPER1/RAB11FIP2/OXCT1/CYBA/HK1/FOXO3/MLXIPL/RAB11B/TRA2B/ENDOG/PCK1/CMA1/PPP3CA/PCK2/PIK3R1/LRP5/OSBP/KLF7/FKBP1B/PRKACA/EFNA5/STX4/TREM2/UNC13B/PIK3CA/IRS2/NR1D1/LRRC8A/SIRT1/LRRC8D/SRF/RAB11FIP5/ADCY5/UBTF/PTPRN2/ZNF236/KLF15/SLC9B2/MEN1/ICAM1/SIDT2/HK2
SC	GOBP_POSITIVE_REGULATION_OF_WNT_SIGNALING_PATHWAY	141	0.377434	2.36943	0.00234192	0.00887008	VCP/RBPJ/CAV1/GPC3/TMEM9/ILK/VPS35/PBXIP1/NFKB1/DAB2/GID8/DIXDC1/CTDNEP1/USP47/WLS/SMAD3/SFRP1/MBD2/ATP6V0C/RSPO3/SFRP4/ATP6AP2/SOX4/ABL1/EGFR/WNK1/ZBED3/KANK1/PPM1A/RPS12/BAMBI/SFRP2/YAP1/RECK/COL1A1/GPRC5B/PIN1/TBL1XR1/JUP/CSNK1E/UBE2B/SULF2/CSNK1G2/MACF1/TNKS2/ZEB2/ZRANB1/BMP2/SKI/DAPK3/RNF146/FAM53B/USP34/PPM1B/ADGRA2/CSNK1G3/SULF1/SPIN1/FGF10/LGR4/CCAR2/TNFAIP3/FGF2
SC	GOBP_POSITIVE_REGULATION_OF_INFLAMMATORY_RESPONSE	138	0.38061	2.37456	0.00234192	0.00887008	DDT/CD81/LGALS1/PTGER3/MGST2/LPL/FABP4/TNIP1/PARK7/HLA-E/RPS19/NUPR1/CASP1/TRADD/VAMP8/GRN/CEBPA/ALOX5AP/C3/VAMP7/PYCARD/NMI/MDK/NINJ1/TNFRSF1A/HYAL2/NEAT1/DHX9/CLOCK/IFI35/PDE2A/STAT5B/NFKBIA/CEBPB/IL16/IL6ST/NPY5R/NKG7/LBP/GPRC5B/GPSM3/PLA2G2A/APP/PDCD4/RIPK1/SNX4/CCL3/TREM2/CD47/S100A9/PTGER4/TLR4/AGT/SNCA/IL33/S100A8/AGTR1/SUCNR1/JAK2
SC	GOBP_ALCOHOL_BIOSYNTHETIC_PROCESS	141	0.409345	2.56976	0.00234192	0.00887008	SOD1/DHDDS/FDFT1/QDPR/ACAA2/NSDHL/SPR/CES1/TM7SF2/ASAH1/LEP/PARK7/PCBD1/CYB5R3/EBP/PMVK/NFKB1/INSIG1/DAB2/IP6K2/FDPS/ACLY/MBTPS1/DHCR7/POR/REST/GPER1/IP6K1/DHCR24/PGP/GBA/GOT1/PTS/FGF1/ERLIN1/IDI1/PCK1/APOE/SCAP/PCK2/CYP27A1/PLEK/LSS/ISYNA1/ARV1/BMP6/SRD5A3/BMP2/SREBF1/H6PD/PTH1R/CYP2R1/LBR/LHCGR/ITPKC/PLPP6/SNCA/ERLIN2/G6PD/FGF2/LPCAT3
SC	GOBP_LIPOPROTEIN_METABOLIC_PROCESS	138	0.425305	2.6534	0.00234192	0.00887008	DBI/PPT1/DPM3/LEP/DGAT2/APOD/ZDHHC3/GPAA1/GOLGA7/PIGF/ATG5/ZDHHC12/PIGC/WDR45B/ZDHHC4/PIGZ/GLUL/DPM2/APOL3/LYPLAL1/ZDHHC6/ZDHHC7/CTSD/PIGU/ZDHHC16/ABHD12/DPM1/ATG101/WIPI2/PIGV/GBA/ABHD13/ZDHHC9/ATG12/PPM1A/ATG7/ITGAV/PIGK/PIGS/NMT1/ABHD10/ZDHHC5/RB1CC1/LYPLA2/ZDHHC2/APOE/ZDHHC1/APOC1/ZDHHC18/APOL6/CLIP3/WIPI1/PGAP2/ANGPTL8/APOM/RABL3/RAB3GAP1/PGAP3/ABCA1/ATG13/SAMD1/PPM1B/PORCN/ZDHHC8/WDR45/MPPE1
SC	GOBP_NEGATIVE_REGULATION_OF_PROTEIN_CONTAINING_COMPLEX_ASSEMBLY	138	0.445632	2.78022	0.00234192	0.00887008	VDAC2/HMGB1/RDX/MTPN/PMEPA1/HSPA5/PFN1/CRYAB/CLU/MKKS/FLII/CAPZB/DNAJC15/VPS35/SPTBN1/GSN/PARK7/MAPRE1/AIDA/TMSB4X/LCMT1/CTNNBIP1/ADD1/RPL13A/ARHGEF7/TWF2/PFN2/EPS8/CAPZA1/BIRC2/SPTAN1/DMTN/BBS4/TMSB10/LMO4/CAPG/LMOD1/GBA/CDH5/KANK1/TFIP11/PPM1A/HSF1/TMOD1/KANK4/TWF1/THRA/KANK3/CRBN/JAM3/STXBP1/FKBP4/SVIL/CLIP3/SSH3/IMPACT/CPTP/TREM2/PTGER4/MYADM/CDC42/TRIOBP/TBCD/SLIT2/RIOK3
SC	GOBP_REGULATION_OF_MITOCHONDRION_ORGANIZATION	138	0.553583	3.45371	0.00234192	0.00887008	PARL/GPX1/GHITM/PDCD5/HAX1/MFF/PINK1/BOK/RALA/BNIP3L/SQSTM1/MTCH2/FIS1/ACAA2/SLC25A5/HTRA2/CLU/TRIAP1/PISD/MUL1/TMEM14A/NOL3/VPS35/TSPO/VAT1/PRELID1/PARK7/BAD/FAM162A/PSMD10/LMNA/VDAC1/PPIF/FBXO7/IGF1/INF2/PID1/DCN/SLC25A4/CTTN/HSPA1A/ZDHHC6/PYCARD/GOLPH3/HUWE1/BNIP3/GPER1/PPARG/RHOT2/CIDEB/BCL2L1/CHCHD10/PDE2A/TNFSF10/NMT1/AVP/MOAP1/FZD5/FBXW7/SREBF2/AKT1/USP36/USP30/RALBP1/RHOT1/KDR/TREM2/DNM1L…
SC	GOBP_REGULATION_OF_MRNA_PROCESSING	138	0.601517	3.75276	0.00234192	0.00887008	AHCYL1/PRDX6/NELFE/LARP7/HSPA8/SAP18/NCBP2/SNW1/PAF1/SLTM/CIRBP/SRPK2/RBFOX2/THRAP3/DDX5/SF1/CELF2/IWS1/RNF20/SRSF3/RBM42/HNRNPK/PUF60/SRSF7/SRSF2/RBM15B/DDX17/C1QBP/SRSF9/CELF1/NCL/YTHDC1/WTAP/KHDRBS1/CTR9/FXR1/CWC22/RBM25/SRSF10/SON/RNF40/RBM4/HNRNPA1/CDK11B/ZFP36L1/REST/PTBP1/MBNL1/RBM3/RBM39/SRSF6/RBM10/SNRNP70/CDK9/SRPK1/MAGOH/SAFB/DHX9/RBM8A/SNRPA/SUPT5H/KHDRBS3/HNRNPU/TRA2B/NOVA1/FAM172A/C…
SC	GOBP_MICROTUBULE_ORGANIZING_CENTER_ORGANIZATION	144	0.263094	1.65622	0.00235294	0.00887008	CHMP3/CETN2/CHMP2A/UXT/NSFL1C/FBXW5/RANBP1/NPM1/CHMP2B/E2F4/DCTN1/OFD1/NUBP1/CHMP1A/ARL2/CKAP5/HAUS4/NDEL1/BBS4/CHMP5/SAC3D1/PPP1R12A/KIF3B/PPP1R35/PDCD6IP/KAT2A/RBM14/GADD45A/PAFAH1B1/CHMP4B/CEP68/PLK2/PKD2/HAUS7/FES/PARD6A/CDK5RAP2/MAP9/ROCK2/FBXW11/UVRAG/CEP63/HAUS1/MPDZ/CETN3/CTNNB1/SIRT1/CCDC61/SLC16A1/CHD3/TRIM37/NIN/SASS6/KIAA0753/UBXN2B/KIF25
SC	GOBP_RESPONSE_TO_CALCIUM_ION	144	0.28612	1.80117	0.00235294	0.00887008	AHCYL1/AKR1C3/CAV1/ANXA11/PEF1/CALM1/HNRNPD/HSPA5/S100A16/CLIC4/BAD/CPNE1/CALM2/SMPD1/KCNIP2/CCND1/PPIF/ACTG1/ADD1/CPNE3/CALM3/ALOX5AP/TXNIP/IQGAP1/MNAT1/ALG2/SEC31A/NCSTN/DMTN/PDCD6/STIM1/INHBB/CRHBP/THBS1/GDI1/CPNE2/ENDOG/PKD2/PPP3CA/MEF2A/SLC25A13/JUND/MEF2C/CAMK2D/PENK/CPNE8/EDN1/JUNB/JUN/SLC25A12
SC	GOBP_KIDNEY_EPITHELIUM_DEVELOPMENT	140	0.290957	1.81991	0.00235294	0.00887008	LAMB2/GPC3/HOXB7/ILK/STAT1/CAT/CTNNBIP1/EDNRB/IQGAP1/SMAD3/PECAM1/SFRP1/LZTS2/ADIPOQ/ACAT1/WWTR1/EXT1/CD34/SPRY1/SIX1/FGF1/AHI1/YAP1/BCL2/PKD2/BMP4/AQP11/EDNRA/MEF2C/HES1/NOTCH1/CTNNB1/BASP1/BMP2/WNT11/EFNB2/IRX2/PODXL/SMAD5/ARG2/ASXL1/SLIT2/SDC4/AGT/SMAD1/MYC/NOTCH2/MTSS1/RARA/KLF15/LGR4/FGF2/HEYL/JAG1
SC	GOBP_NEGATIVE_REGULATION_OF_ION_TRANSPORT	144	0.319157	2.00914	0.00235294	0.00887008	C4orf3/TMBIM6/CAV1/ISCU/MAOB/ARL6IP5/CALM1/ATF4/ADRA2A/SRI/SUMO1/YWHAE/GOPC/LEP/CALM2/INPP5K/GSTO1/FKBP1A/BIN1/VDAC1/PPIF/COMMD1/CALM3/SLC9A3R1/OXSR1/TWIST1/SFRP4/SESTD1/WNK1/UBQLN1/PXK/CAB39/BCL2/STK39/GSTM2/REM1/CRBN/NPY5R/PKD2/TRDN/GPM6B/CAMK2D/FKBP1B/TRIM27/GABRE/SLC30A1/RGS2/HES1/ATP1A2/FMR1/NEDD4L/KCNAB1/SLC43A1/PACSIN3/MMP9/SNCA
SC	GOBP_MAINTENANCE_OF_CELL_NUMBER	140	0.338281	2.11592	0.00235294	0.00887008	RBPJ/LSM1/PELO/TPT1/PAF1/FOXO1/MED7/SMC3/GNL3/IGF1/LDB2/MED21/ZNF706/ZC3H13/RTF1/CTR9/VPS72/SFRP1/NIPBL/ZNF358/SOX4/SAV1/REST/ZFP36L2/SETD6/LOXL2/KLF10/FOXO3/KAT2A/PRRX1/SRRT/YAP1/MED12/LRP5/MED15/MED30/CNOT2/MTF2/SMC1A/HES1/NOTCH1/WDR43/LDB1/CTNNB1/ZHX2/STAT3/KLF4/CNOT1/SKI/MED14/MED6/MYC/TCF15/FGF10/JAG1/TAF6L/PHF19/CUL4A/TEAD4/PCM1/PTN/ZNF322/LIG4
SC	GOBP_REGULATION_OF_CELLULAR_CARBOHYDRATE_METABOLIC_PROCESS	144	0.396166	2.49392	0.00235294	0.00887008	RANBP2/PFKFB1/BCKDK/LEP/DGAT2/FOXO1/BAD/PDK2/INPP5K/SORBS1/LCMT1/NUPR1/IGF1/ACADM/PPP1CA/ADIPOR1/IGFBP4/ARPP19/SDHAF3/PGAM1/FAM3C/NNMT/ADIPOQ/POMC/GPER1/PPP1CB/PGP/DUSP12/USP7/WDR5/DDIT4/OGT/PPP4R3B/CLK2/KAT2A/SESN2/PHLDA2/PDK4/FBP1/PLEK/AKT1/GPT/C1QTNF1/INSR/EPM2AIP1/KHK/IGF2/STAT3/PTH1R/GIT1/IRS2/RGN/SLC25A12/NCOA2/SIRT1/LHCGR/CRY1/ACACB/DYRK2/SNCA/SIRT6/PPP1R3C
SC	GOBP_RESPONSE_TO_UV	144	0.415255	2.6141	0.00235294	0.00887008	XPA/GPX1/YY1/CIRBP/ATF4/TRIAP1/EIF2S1/PCNA/COPS9/SMPD1/NPM1/CCND1/CAT/MFAP4/TP53I13/TREX1/MMP2/SDF4/USP47/CARD16/PARP1/AQP1/XPC/EGFR/ERCC5/USP1/REV1/CRIP1/TIMP1/HYAL2/KDM1A/RPL26/RELA/CUL4B/FEN1/EIF2AK4/MME/BCL2/CDKN2D/TMEM161A/TRIM32/PIK3R1/ERCC1/SPRTN/N4BP1/AKT1/UBE2B/CASP7/MAP4K3/ERCC3/PRIMPOL/IMPACT/C9orf116/RHBDD1/ZBTB1/POLD3/CDKN1A/RUVBL2/TP53INP1/PPID/FMR1/SIRT1/BCL3/CASP3/UBE2A/MYC/MMP9/M…
SC	GOBP_REGULATION_OF_PEPTIDYL_SERINE_PHOSPHORYLATION	144	0.421941	2.65618	0.00235294	0.00887008	HSP90AB1/ATP2B4/HAX1/CAV1/HSP90AA1/PINK1/NTRK2/PWP1/GGNBP2/CREBL2/MIF/TERF2IP/PARK7/PDCD10/RACK1/TXN/ARAF/INPP5K/CD44/PFN2/EIF4G1/GAS6/PTEN/TNKS1BP1/DMTN/EGFR/CAMK1/BAG4/MAPKAP1/DDIT4/MLXIPL/SFRP2/FNIP2/SMYD3/GADD45A/RAMP3/BCL2/HCLS1/AVP/MAD2L2/PAK1/APP/ANGPT1/SPRY2/AKT1/AKAP9/NCK1/RIPK2/PLCL2/GPD1L/RAPGEF3/SH2D3C/PIK3CA/STOX1/FNIP1/PRKD1/SNCA/TFRC
SC	GOBP_CYTOPLASMIC_TRANSLATION	144	0.779259	4.90556	0.00235294	0.00887008	YBX1/EIF2S2/EIF3A/CSDE1/YTHDF2/RPL3/SLBP/HNRNPD/EIF3D/EIF4H/RPL4/RPL26L1/ZC3H15/RPL35/RPLP0/RPL6/CNBP/NEMF/ETF1/RPL8/RWDD1/DRG1/RPS3A/RPL19/EIF3I/RPS6/EIF4B/RPS4X/RPS19/RPL13/RPS5/DHX29/RPL7/RPL15/RPS3/RPS9/RPS10/EIF5/RPSA/GSPT1/PABPC1/RPL7A/RPL32/DPH3/RPL36/RPS8/RPS7/RPL18/RPS15/RPLP1/SYNCRIP/RPL10/RPS2/UBA52/RPL29/RPL13A/RPL11/EIF4A1/EIF2B3/EIF4G1/RPS13/RPLP2/RPL10A/EIF4A2/RPL18A/RPL12/RPL5/FTS…
SC	GOBP_REGULATION_OF_CALCIUM_ION_TRANSMEMBRANE_TRANSPORT	146	0.281681	1.7786	0.00235849	0.00887008	C4orf3/AHNAK/CALM1/ADRA2A/SRI/FYN/SUMO1/YWHAE/CALM2/GSTO1/FKBP1A/BIN1/VDAC1/ATG5/CALM3/TSPAN13/THY1/SESTD1/ABL1/GPER1/STIM1/CDK5/PSEN2/CYBA/UBQLN1/RAMP3/GSTM2/REM1/APLNR/PKD2/VMP1/CORO1A/TRDN/CACNA2D1/JSRP1/PTPN6/PRNP/CAMK2D/FKBP1B/PRKACA/ATP1A2/HTT/RGN/FMR1/CXCL10/PRKD1/SNCA/G6PD/ANK2/DIAPH1/PLN/GEM/RRAD/CLIC2/CAPN3/STIM2/CXCL9/ATP1B1
SC	GOBP_SULFUR_COMPOUND_BIOSYNTHETIC_PROCESS	146	0.29561	1.86655	0.00235849	0.00887008	ACSS2/CDO1/GSTP1/MGST2/PDHA1/ACSL1/PPT1/PPCS/SLC25A1/MPC2/B4GAT1/ELOVL1/PDK2/NFE2L2/ELOVL5/DLD/ADI1/ACLY/TECR/ENOPH1/ACSL3/ACAT1/MAT2A/PAPSS2/HAGH/EXT1/BHMT2/CHPF/AKR1A1/SLC35B3/SP1/PAPSS1/GCDH/PDK4/ACSL5/ANGPT1/PPT2/SLC35B2/ELOVL3/ACSL4/ST3GAL1/B3GNT2/CHAC2/B3GALT6/CHST3/PDHB/CHST7/DLAT/ACACB/GLCE/ST3GAL4/MTHFD1/SNCA/NDST2/MTRR/GSTM1/APIP/CHST2/MPST/GGT7/DSEL/CHPF2/NDST1/DSE/CSGALNACT2
SC	GOBP_PLACENTA_DEVELOPMENT	146	0.366014	2.31109	0.00235849	0.00887008	SOD1/RBPJ/HSP90AB1/HTRA1/CDKN1C/NSDHL/GGNBP2/BSG/RTCB/ANG/LEP/RPS6/DEDD/EPAS1/HECTD1/PRDX3/TRIM28/CEBPA/ADM/GRB2/BIRC2/RSPO3/CITED2/ZFP36L1/NCOA1/MAPK14/EGFR/CTSB/PPARG/DNAJB6/NR2F2/TPPP3/ADA/MME/LDOC1/CEBPB/PHLDA2/TMED2/PKD2/FZD5/MAP2K1/AKT1/BPTF/PCDH12/CUL7/MDFI/ALKBH1/CDKN1B/BIRC6/SPP1/HEY1/ETV2/HES1/IGF2/JUNB/SETD2/NOTCH2/PDGFB/MEN1/BMPR2/MAP3K4/SOCS3
SC	GOBP_REGULATION_OF_T_CELL_DIFFERENTIATION	147	0.256185	1.61565	0.00236407	0.00887008	SOD1/HMGB1/RHOA/PRDX2/ANXA1/PRELID1/HLA-DRA/XBP1/BAD/HLA-DRB1/DROSHA/CD74/TGFBR2/AP3D1/BCL6/MDK/SOX4/ABL1/ZMIZ1/CLPTM1/FGL2/FOXO3/ADA/AP3B1/SOS1/CD83/KAT2A/STAT5B/ZBTB16/PCK1/ZEB1/BMP4/RIPK2/CD2/ZBTB1/CCL19/SART1/CD86/RC3H1/CYP26B1/SASH3/PTPRC/SH3RF1/LGALS9/SOS2/HLX/SOCS1/ZBTB7B/RARA/SYK
SC	GOBP_ACTIVATION_OF_PROTEIN_KINASE_ACTIVITY	139	0.26132	1.63095	0.00236407	0.00887008	ITGB1BP1/PHB2/PHB/PINK1/PPP2R3C/ADRA2A/ANG/LEP/PARK7/TXN/DAXX/PPIA/IGF1/RPLP1/TGFBR2/STRADB/COPS8/GAS6/OSBPL8/ABL1/MOB3C/WNK1/MAP3K7/ADRB2/MOB2/ADNP/ZFP91/CAB39/FGF1/RGCC/IRAK1/GPRC5B/MAP2K1/ANGPT1/INSR/PRNP/PDGFC/EFNA5/MTOR/WNT11/PIK3CA/CD86/AGT/PRRC1/PIBF1/SOCS1/PDGFB/GHR/CHI3L1/JAK2/RIPK3/TRAF2
SC	GOBP_PHOSPHATIDYLINOSITOL_3_KINASE_SIGNALING	139	0.293359	1.83092	0.00236407	0.00887008	HAX1/NTRK2/LEP/MYDGF/CAT/C1QBP/IGF1/RGL2/PIK3IP1/FGFR1/DCN/SLC9A3R1/PTEN/TWIST1/PDGFRB/ZFP36L1/EGFR/GPER1/MYOC/STAMBP/MAZ/PRR5/HCST/PDGFD/FN1/UBE3A/HCLS1/PIK3R1/ANGPT1/AKT1/INSR/PTPN6/PDGFC/TEK/KDR/TREM2/SELP/PIK3CA/BECN1/EDN1/PTPN13/SIRT1/PEAR1/FGR/AGT/PDGFRA/PDGFB/ROR1/FGF2/PIP5K1B/PLXNB1/JAK2/HTR2B
SC	GOBP_ENSHEATHMENT_OF_NEURONS	139	0.330063	2.05999	0.00236407	0.00887008	SOD1/GNPAT/PMP22/NTRK2/CLU/ILK/CYFIP1/NDRG1/ZNF24/ORMDL3/PTEN/HEXB/EIF2B5/PARD3/CLDN5/NCSTN/MYOC/NSUN5/MAL2/FIG4/WASF3/TYMP/MTMR2/EPB41L3/CMTM8/MARVELD1/GPC1/CD9/NAB1/ID4/JAM3/LGI4/CST7/AKT1/EIF2B2/QKI/ABCD2/TNFRSF21/SLC25A46/ATRN/EIF2B4/RNF10/PLEC/CXCR4/DICER1/TNFRSF1B/CTNNB1/MTOR/DAG1/AFG3L2/SLC25A12/SKI/B4GALT5
SC	GOBP_MULTICELLULAR_ORGANISM_GROWTH	139	0.344697	2.15133	0.00236407	0.00887008	SOD1/CDKN1C/HTRA2/MKKS/COL3A1/CDK4/STAT5A/CLIC4/ATRX/GPAM/IGF1/PPIB/AR/RBBP6/ARID5B/STK40/NIPBL/ZFP36L1/NPY1R/WDR48/BBS4/TNS2/PTPN11/TAF10/ADRB2/WWTR1/EXT1/SOS1/KAT2A/HOXA5/STAT5B/PKDCC/EZR/BCL2/HEG1/TMED2/KLF2/CCM2/APP/ERCC1/TBL1XR1/CSF1/FKBP8/ATRN/PLEC/TNKS2/IGF2/MTOR/STAT3/PIK3CA/AFG3L2/SOCS2/GAMT/GPAT4/SP2/NOTCH2/RARA/SLC25A25/GHR/RARG
SC	GOBP_POSITIVE_REGULATION_OF_SMALL_MOLECULE_METABOLIC_PROCESS	139	0.379562	2.36893	0.00236407	0.00887008	VCP/PINK1/ENO1/GPD1/NR1H3/CES1/ANXA1/PARK7/DGAT2/FOXO1/SORBS1/TMSB4X/ELOVL5/IGF1/DAB2/CD74/PID1/ARPP19/ADM/ZBTB20/NNMT/TWIST1/ADIPOQ/POR/GPER1/PPARG/WDR5/MLXIPL/MT-CO2/PPP4R3B/KAT2A/NR1H2/FGF1/AVP/SCAP/APP/AKT1/ABCD2/GPT/INSR/BMP6/EPM2AIP1/TREM2/IGF2/SREBF1/LPGAT1/PTH1R/IRS2/NR1D1/RGN/SLC25A12/SIRT1/LHCGR/MYC/CLYBL/DYRK2/SNCA
SC	GOBP_POSITIVE_REGULATION_OF_CHEMOTAXIS	139	0.387527	2.41864	0.00236407	0.00887008	HMGB1/RARRES2/RAC1/CREB3/VEGFB/HSPB1/TMSB4X/C1QBP/AIF1/CD74/FGFR1/CXCL12/SMAD3/GAS6/OXSR1/MDK/PDGFRB/CSF1R/C3AR1/NRP1/WNK1/ZNF580/THBS4/CALR/THBS1/PDGFD/STK39/SWAP70/AKIRIN1/IL16/S1PR1/LBP/GPSM3/VEGFD/CSF1/SMOC2/CXCR4/RAC2/CCL3/CCL4/CMKLR1/STX4/KDR/TREM2/DNM1L/CCL19/EDN1/CXCL10/TPBG/SLIT2/ANO6/VEGFC/P2RY12/CCR1/LGALS9/PRKD1/PDGFB/FGF10/FGF2/BMPR2/SUCNR1/CCL21/PLA2G7/AGER/PRKD2/MCU/LGMN/PTN
SC	GOBP_REGULATION_OF_DNA_REPAIR	139	0.397056	2.47811	0.00236407	0.00887008	CEBPG/MORF4L1/HMGB1/UBE2V1/MORF4L2/MAGEF1/TRIP12/MGMT/TERF2IP/ACTB/MEAF6/PCNA/PARP3/RPA2/RPS3/BABAM1/TRIM28/NUDT16L1/UBE2N/KAT5/VPS72/DEK/PARP1/TWIST1/EGFR/WDR48/USP1/DMAP1/CDK9/KMT5B/KDM1A/DHX9/XRCC1/TFIP11/SPIDR/PPP4C/PPP4R3B/PRKDC/WRNIP1/HSF1/UBE2V2/MRGBP/ACTR2/ZCWPW1/TMEM161A/MAD2L2/PNKP/RBBP8/MMS19/YEATS4/SETMAR/BRCC3/ACTL6A/ING3/SLF1/RUVBL2/SIRT1/SETD2/EPC2/SPIRE1/SIRT6/FGF10/EYA2/WRAP53/TP…
SC	GOBP_MICROTUBULE_CYTOSKELETON_ORGANIZATION_INVOLVED_IN_MITOSIS	147	0.396106	2.49807	0.00236407	0.00887008	VCP/CHMP3/ITGB1/POLDIP2/CHMP2A/RHOA/BCCIP/RAN/DCTN2/NSFL1C/DRG1/TUBG2/MAP4/NUDC/NEK6/CHMP2B/PARP3/RAB11A/DYNLT1/DCTN1/SMC3/KPNB1/CLTC/OFD1/CHMP1A/TACC1/CHMP6/HSPA1A/CKAP5/RAE1/SBDS/LSM14A/EML3/NDEL1/CHMP5/CHMP4A/DCTN6/TUBG1/AAAS/CHMP7/FLNA/KIF3B/HNRNPU/PDCD6IP/SPRY1/SUN2/TPR/PAFAH1B1/CHMP4B/PLK2/CCNB1/SPRY2/CDK5RAP2/MAP9/FBXW11/SMC1A/ZW10/NUMA1/HTT/KIF2A/STAG1/MZT1/SETD2/PIBF1/GJA1/RMDN1/CCDC61/P…
SC	GOBP_POSITIVE_REGULATION_OF_LEUKOCYTE_MIGRATION	139	0.411768	2.56994	0.00236407	0.00887008	HMGB1/RARRES2/CD99/RHOA/RAC1/CREB3/XG/VEGFB/CD99L2/C1QBP/AIF1/CD74/CXCL12/LGALS3/PYCARD/GAS6/OXSR1/MDK/THY1/LYVE1/CSF1R/C3AR1/WNK1/FADD/ZNF580/THBS4/CALR/THBS1/PDGFD/TNFRSF14/STK39/SWAP70/AKIRIN1/PLVAP/IL1R1/JAM3/LBP/GPSM3/APP/VEGFD/CSF1/RAC2/CCL3/CCL4/CMKLR1/TREM2/SELP/DNM1L/CD47/CCL19/EDN1/CXCL10/ANO6/VEGFC/P2RY12/CCR1/LGALS9/ICAM1/KITLG/CCL21/CCL8/TNFRSF18/PLA2G7/MMP14/AGER/MCU/LGMN/PTN
SC	GOBP_REGULATION_OF_REACTIVE_OXYGEN_SPECIES_METABOLIC_PROCESS	139	0.456035	2.84621	0.00236407	0.00887008	PARL/SOD1/AKR1C3/CD36/ARF4/PINK1/EIF6/TUSC2/RHOA/GSTP1/CBR1/RAC1/CRYAB/FBLN5/FYN/PRDX2/DCXR/TSPO/AKR1C1/LEP/PARK7/FOXO1/DHRS4/NFE2L2/AATF/ROMO1/TGFBR2/ATG5/PID1/GRB2/BIRC2/MPV17/PDGFRB/PRCP/MAPK14/GNAI2/BNIP3/H19/CYBA/TYROBP/FOXO3/THBS1/MT-CO2/CTNS/GADD45A/BCL2/TRAP1/SLC5A3/STK17A/ABCD2/RIPK1/ITGB2/BST1/CYP1B1/RAC2/BECN1/CDKN1A/TLR4/ARG2/AGT/BCR/SNCA/PDGFB/SYK/G6PD/ACP5/NOXA1/AGTR1/ZNF205/RIPK3/H…
SC	GOBP_POSITIVE_REGULATION_OF_B_CELL_ACTIVATION	135	0.326747	2.01767	0.00236967	0.00887008	SH3KBP1/CD81/PPP2R3C/MIF/XBP1/BAD/TNIP2/CD74/BCL6/HMCES/KMT5B/TRDC/ADA/TNFSF13/STAT5B/CD320/MLH1/BCL2/TNFSF13B/TRBC2/TRBC1/SLC39A10/MAD2L2/GPR183/PCID2/TNFRSF4/MEF2C/BST1/IGKC/PELI1/IGLC3/IGLC2/STAT6/CDKN1A/TICAM1/IRS2/TLR4/IGLC1/NFATC2/SASH3/IGHA1/PTPRC/EXOSC3/TFRC/SYK/TP53BP1/IGLL5/IGHM/CD40
SC	GOBP_RESPONSE_TO_IONIZING_RADIATION	135	0.348468	2.1518	0.00236967	0.00887008	XRCC6/GPX1/XRCC5/HSPA5/CRYAB/EEF1D/MGMT/TMEM109/ANXA1/SMPD1/CCND1/SWI5/BABAM1/HRAS/TREX1/KAT5/GRB2/NUCKS1/SFRP1/NIPBL/PARP1/TNKS1BP1/MAPK14/ALAD/GTF2H5/CYBA/KDM1A/BCL2L1/RPL26/IFI16/CLOCK/SPIDR/PRKDC/SFRP2/CLK2/HSF1/GADD45A/YAP1/BCL2/XRCC4/RHOB/NABP2/ERCC1/NET1/TANK/BRAT1/BRCC3/NHEJ1/CDKN1A/SIRT1/CXCL10/CASP3/VCAM1/THBD/SNAI2/PTPRC/MYC/EGR1/MEN1/TP53BP1/TRIM13/TSPYL5
SC	GOBP_RESPONSE_TO_INTERLEUKIN_1	135	0.361911	2.23481	0.00236967	0.00887008	YY1/GBP2/IGBP1/ANXA1/SMPD1/TAF9/TNIP2/NFKB1/AKAP12/ADAMTS12/MMP2/TOLLIP/PYCARD/SFRP1/INHBB/SIRPA/MAP3K7/CYBA/CCL13/HYAL2/RELA/CCL14/CEBPB/KLF2/PCK1/IL1R1/IRAK1/APP/CCL18/UPF1/GBP1/VRK2/TANK/RIPK2/CCL3/CCL4/HES1/USP10/RBMX/MYD88/CD47/CCL19/NR1D1/EDN1/RC3H1/IL1RN/MYC/LGALS9/CCL2/SNCA/GBP3/EGR1/GHR/CHI3L1/CD40/CCL21/CCL23/CCL8
SC	GOBP_CELLULAR_RESPONSE_TO_CARBOHYDRATE_STIMULUS	135	0.362688	2.23961	0.00236967	0.00887008	GPX1/JAGN1/NDUFAF2/SERPINF1/SLC29A1/PPP3CB/ADRA2A/SRI/PIH1D1/MPC2/LEP/XBP1/HMGN3/BAD/HLA-DRB1/RACK1/CDK16/UCP2/ZBTB20/GAS6/PIM3/ZFP36L1/SOX4/GPER1/RAB11FIP2/OXCT1/CYBA/FOXO3/MLXIPL/RAB11B/TRA2B/ENDOG/PCK1/CMA1/RPS6KA2/PPP3CA/PCK2/LRP5/OSBP/KLF7/FKBP1B/PRKACA/EFNA5/STX4/MAP2K3/TREM2/UNC13B/PIK3CA/IRS2/NR1D1/SRF/MYC/RAB11FIP5/ADCY5/UBTF/PTPRN2/ZNF236/SLC9B2/MEN1/ICAM1/SIDT2
SC	GOBP_TRANSITION_METAL_ION_HOMEOSTASIS	135	0.363712	2.24593	0.00236967	0.00887008	ACO1/SOD1/NDFIP1/ISCU/ATOX1/FTH1/CUTC/STEAP1/ATP6V1G1/ARF1/SRI/FBXL5/NCOA4/SLC25A28/FTL/B2M/CCDC115/EIF2AK1/SLC31A2/EPAS1/SLC39A6/NUBP1/BOLA2B/COMMD1/PICALM/BOLA2/AP3D1/BDH2/CCDC22/HYAL2/AP3B1/SLC40A1/ATP6AP1/SCARA5/MT1X/SLC39A10/ATP6V0D1/APP/GLRX3/MT1F/PRNP/ABCB6/SLC39A13/SLC30A1/BMP6/HMOX2/S100A9/MT1M/TMEM199/CYB561/HMOX1/SLC39A7/MT2A/MT1E/MYC/TFRC/SLC25A37/CYBRD1/S100A8
SC	GOBP_POSITIVE_REGULATION_OF_TRANSLATION	135	0.574146	3.54537	0.00236967	0.00887008	SERP1/POLR2G/YBX1/VIM/CSDE1/PINK1/EIF6/YTHDF2/RHOA/HNRNPD/EIF3D/CDC123/CIRBP/PYM1/CNBP/COA3/EIF4G2/RPS4X/UQCC2/YTHDF1/NPM1/METTL5/DHX29/USP16/RCC1L/RPS9/TRMT10C/LARP6/C1QBP/PABPC1/UPF3B/SYNCRIP/EEF2/PCIF1/POLDIP3/EIF4G1/KHDRBS1/FXR1/RPL5/PAIP1/EIF2B5/MIF4GD/PLXNB2/SOX4/PKM/HABP4/RBM3/EIF3C/UPF3A/NSUN5/LARP1/DNAJC3/YBX3/RPL26/DHX9/MPV17L2/THBS1/HNRNPU/PRKDC/EIF2AK4/EIF5A/TOB1/NGRN/NCK1/IMPACT/CYP1…
SC	GOBP_MEMBRANE_LIPID_BIOSYNTHETIC_PROCESS	145	0.250528	1.58091	0.0023753	0.00887008	PLPP1/ORMDL1/ORMDL2/SCCPDH/VAPA/DPM3/ASAH1/ELOVL1/SMPD1/PEMT/GPAA1/ELOVL5/PIGF/PIGC/PIGZ/DPM2/ORMDL3/PLPP3/PIGU/DPM1/ST6GALNAC6/TM9SF2/PIGV/B3GALT4/GBA/B4GALT3/SMPD2/PIGK/CERS2/PIGS/KDSR/OSBP/SGPP1/SGMS1/ELOVL3/CSNK1G2/PGAP2/ST3GAL1/PGAP3/SIRT3/ST6GALNAC4/ST3GAL4/B4GALT5/CERS6/PRKD3/PRKD1/MPPE1
SC	GOBP_POSITIVE_REGULATION_OF_NEURON_PROJECTION_DEVELOPMENT	145	0.281594	1.77695	0.0023753	0.00887008	SERPINF1/NTRK2/HSPA5/FYN/VLDLR/DDX56/NFE2L2/SNX3/CYFIP1/CAPRIN1/GRN/TWF2/EHD1/MDK/DBN1/STK24/PLXNB2/NDEL1/ABL1/CAMK1/STYXL1/SETX/FIG4/TMEM30A/KDM1A/ADNP/FLNA/DPYSL3/ARHGAP35/PAFAH1B1/ITGA6/TWF1/ACTR2/DBNL/APOE/NCKIPSD/FES/RAPGEF1/DVL1/NCK1/PPP2R5B/FKBP1B/RAP1A/CREB3L2/RGS2
SC	GOBP_CARDIOCYTE_DIFFERENTIATION	145	0.306868	1.93644	0.0023753	0.00887008	RBPJ/ITGB1/YY1/MESP1/TOMM70/CBY1/LMNA/IGF1/SGCB/ACADM/ATG5/TGFBR3/TWIST1/CITED2/ENG/PDGFRB/REST/EGFR/GPER1/CALR/HNRNPU/SPRY1/SEMA3C/KAT2A/PARP2/MEF2A/BMP4/PDCD4/MAML1/EDNRA/MEF2C/SOX17/PI16/PLEC/OBSL1/RGS2/HES1/SOX18/NOTCH1/MTOR/BMP2/EFNB2/EDN1/VCAM1/CDC42/AGT/ACVR1/SRF/SGCD/PDGFRA/RARA/G6PD/JAG1/AKAP13
SC	GOBP_NEPHRON_DEVELOPMENT	145	0.307435	1.94002	0.0023753	0.00887008	LAMB2/GPC3/HOXB7/SEC61A1/ILK/STAT1/CTNNBIP1/EDNRB/IQGAP1/PECAM1/LZTS2/MPV17/ADIPOQ/PDGFRB/ACAT1/WWTR1/EXT1/NID1/CD34/SIX1/PDGFD/FGF1/AHI1/YAP1/BCL2/PKD2/BMP4/AQP11/ANGPT1/EDNRA/MEF2C/SULF2/NUP85/HES1/TEK/NOTCH1/CTNNB1/ACTA2/BASP1/BMP2/WNT11/IRX2/PODXL/ASXL1/NOTCH3/AGT/SULF1/MYC/NOTCH2/MTSS1/PDGFRA/EGR1/PDGFB/KLF15/LGR4/FGF2/HEYL/JAG1
SC	GOBP_HEPATICOBILIARY_SYSTEM_DEVELOPMENT	137	0.342657	2.12611	0.0023753	0.00887008	CEBPG/MESP1/HNRNPD/ACO2/ASS1/CDKN2B/ANXA1/XBP1/PCNA/CCND1/FPGS/UCP2/RPS15/ACADM/TGFBR3/ARID5B/CEBPA/ARF6/UPF2/SEC63/SMAD3/NIPBL/MDK/CITED2/PRMT5/ACAT1/TAF10/CDK5RAP3/LIMS2/RELA/ADA/FGF1/CEBPB/RB1CC1/PCK1/PKD2/FBXW7/SRSF5/PCK2/GFER/CUL3/SOX17/FRZB/MKS1/RHBDD3/HES1/NOTCH1/PIK3CA/ATF2/RGN/JUN/HMOX1/CSNK2A2/MAN2A1/MYC/HLX/NOTCH2/RARA/TNFAIP3/LSR
SC	GOBP_ORGANELLE_FUSION	137	0.45193	2.80413	0.0023753	0.00887008	CHMP3/VAMP3/PARL/ANXA2/STOML2/VTI1B/MFF/RAB7A/SNAPIN/MFN2/MTCH2/FIS1/MUL1/VPS4A/VAT1/ANXA1/CAV2/CHMP2B/RCC1L/RAB34/CHCHD3/STX12/VPS16/RAB20/STX10/VPS39/VAMP8/PID1/ARL8B/EEA1/USO1/ZDHHC6/VAMP7/HUWE1/STX16/PIP4K2B/RAB7B/VAMP4/STX6/BNIP3/YIPF5/RAB13/BNIP1/RAB8B/STX5/PIP4K2A/CORO1A/STXBP1/TBC1D4/STX8/UVRAG/TMEM175/USP30/STX7/STX4/GOSR2/VAMP2/AFG3L2/SAMD9/SNAP23/SNAP47/RAB8A/VPS18/VPS41/SNCA/TFRC
SC	GOBP_REGULATION_OF_CELL_SHAPE	145	0.491126	3.09917	0.0023753	0.00887008	MYL12B/SH3KBP1/RDX/RHOA/ALDOA/RAC1/RHOQ/FYN/PALMD/PRPF40A/MYH10/GNA12/PHIP/ANXA1/RHOC/FAM171A1/RHOBTB3/CRK/PARVA/MYH9/CYFIP1/CFDP1/FERMT2/WDR1/ITGA7/CDC42EP2/RHOG/ARHGAP18/EPS8/CDC42EP4/RHOD/MSN/SLC9A3R1/HEXB/PLXNB2/DMTN/DLC1/CSF1R/RASA1/WASF3/CCL13/EPB41L3/BAMBI/LPAR1/PLEKHO1/CDC42EP1/PLXND1/PLXNA4/ARHGAP35/FN1/EZR/RHOB/GNA13/RHOBTB1/CORO1A/FES/PALM/RHOU/MKLN1/RND3/ITGB2/LST1/RAC2/CCL3/KDR/DAG1/…
SC	GOBP_PROTEIN_CONTAINING_COMPLEX_LOCALIZATION	148	0.265971	1.67785	0.00239234	0.00887008	KIF5B/EIF6/SNAPIN/IFT43/IFT57/RAN/IFT27/VPS35/SDAD1/SSNA1/RALB/NPM1/ZDHHC3/RAB11A/ARL3/RPS15/HRAS/IFT52/AP3D1/EXOC3/IFT46/LTV1/DBN1/PURA/SFPQ/TYROBP/KIF3B/HNRNPU/DYNC2H1/WASL/EZR/LSG1/GPC6/FKBP4/AKAP9/GPC4/RAP1A/STX7/NACC2/MIOS/DAG1/EFNB2/TNFAIP2/MZT1/RAB8A/CLSTN1/RRS1/SGCD/TTC30A/NDC1/NUP88
SC	GOBP_CELL_CELL_JUNCTION_ASSEMBLY	148	0.271807	1.71466	0.00239234	0.00887008	CTNNA1/GNPAT/CAV1/RHOA/MYO1C/TLN2/RHOC/ACTB/WDR1/ACTG1/VCL/ARL2/RAMP2/PECAM1/TLN1/PARD3/CLDN5/PKP4/GJA4/TJP1/CDH5/ESAM/EPB41L3/RAB13/GPBAR1/PDCD6IP/CD9/HDAC7/ROCK1/OCEL1/HEG1/APLNR/JAM3/FZD5/JUP/CTNND1/ROCK2/HIPK1/PRKACA/AFDN/MPDZ/CTNNB1/WNT11/STRN/ZNF703/GJA5/PKN2/TBCD/SNAI2/AGT/SRF/GJA1
SC	GOBP_REGULATION_OF_EPITHELIAL_CELL_DIFFERENTIATION	148	0.308012	1.94306	0.00239234	0.00887008	CAV1/CDKN1C/MESP1/NME2/CDKN2B/STAT1/HOXA7/BTG1/BAD/CCND1/KEAP1/ADD1/VCL/SFRP4/ZFP36L1/CLDN5/SRSF6/CDH5/TNFRSF1A/WWTR1/PPP1R12A/SPRY1/AHI1/ID1/ROCK1/STAT5B/YAP1/CEBPB/VEZF1/ZEB1/BMP4/SPRY2/KLF7/ROCK2/SGPP1/FRZB/ACVRL1/MAFG/BMP6/CDKN1B/ETV2/HES1/NOTCH1/ATOH8/ERRFI1/SPRED2/CTNNB1/NUMA1/TMEM100
SC	GOBP_PLASMA_MEMBRANE_ORGANIZATION	148	0.326628	2.0605	0.00239234	0.00887008	CHMP3/SERP1/SOD1/CAV1/SH3GLB1/CHMP2A/FLOT1/CLU/SNX9/SPTBN1/GSN/CAV2/SMPD1/CHMP2B/MYH9/BIN1/FOLR2/AR/EHD2/NDRG1/CHMP1A/PLEKHM2/ARL8B/CHMP6/SLC9A3R1/ANXA6/PTEN/MYOF/CHMP5/ATG9A/CHMP4A/EPB41L3/COL5A1/CHMP7/ASAP1/CD9/PLSCR1/WASL/CHMP4B/VMP1/SNX33/AKT1/BIN3/ABCD2/XKR8/PLEC/ARV1/CXCR4/SPESP1/FNBP1L/STX4/PLSCR4/S100A9/PACSIN2/SERPINA5
SC	GOBP_SECONDARY_ALCOHOL_METABOLIC_PROCESS	148	0.379931	2.39675	0.00239234	0.00887008	SOD1/HDLBP/ACADVL/IDH3B/FDFT1/SNX17/ACO2/ACAA2/NSDHL/NPC2/CES1/VLDLR/IDH3G/TM7SF2/LEP/DGAT2/SMPD1/CYB5R3/EBP/PMVK/NFE2L1/CAT/LIMA1/INSIG1/CEBPA/IDH1/FDPS/EPHX2/ACLY/MBTPS1/DHCR7/POR/TSKU/OSBPL1A/DHCR24/GBA/LIPE/FGF1/ERLIN1/IDH2/IDI1/ABCA5/APOE/SCAP/FDX1/IDH3A/APP/SREBF2/CYP27A1/LSS/RXRA/LRP5/STARD3/SCARB1/ARV1/ABCA1/SREBF1/CYP2R1/LBR/GBA2/PLPP6/ERLIN2/G6PD/LPCAT3/CH25H/FDXR/SQLE/LDLRAP1/LCAT/CYP1…
SC	GOBP_NIK_NF_KAPPAB_SIGNALING	136	0.390232	2.41122	0.00239808	0.00887008	PHB2/PHB/PRDX1/RHOA/ILK/NOL3/TERF2IP/TRIP6/RBCK1/CD14/CPNE1/TMSB4X/RPS3/LITAF/TRADD/SASH1/ADIPOR1/BIRC2/TRIM44/COPS8/C20orf27/NMI/MKRN2/EGFR/ACTN4/MAP3K7/CALR/LAPTM5/RELA/PPM1A/IFI35/ZFP91/PPP4C/HDAC7/EZR/NFKBIA/IRAK1/APP/PDCD4/AKT1/UACA/TSPAN6/DICER1/TREM2/CCL19/EDN1/CD86/RC3H1/BIRC3/BCL3/TLR4/PTP4A3/PPM1B/LGALS9/MIR223/CHI3L1/RIPK3/TRAF2/LIMS1/AGER/NOD1
SC	GOBP_RESPONSE_TO_INTERFERON_GAMMA	136	0.423306	2.61559	0.00239808	0.00887008	VAMP3/KIF5B/HSP90AB1/VIM/GBP2/ASS1/NR1H3/VPS26B/STAT1/MYO1C/GSN/JAK1/HLA-DPA1/GAPDH/IFITM3/RAB20/AIF1/CASP1/CDC42EP2/BST2/ACTG1/CD74/SYNCRIP/RPL13A/CD58/CDC42EP4/IFITM2/NMI/IFITM1/CDC37/RAB7B/SIRPA/ZYX/PPARG/CCL13/MRC1/CCL14/NR1H2/ACTR2/ACTR3/STXBP1/IRF8/STX8/CCL18/GBP1/TRIM21/FLNB/CCL3/CCL4/STX4/CD47/CCL19/EDN1/TLR4/DAPK3/CDC42/MYC/NUB1/LGALS9/CCL2/SOCS1/SNCA/GBP3/UBD/CD40/JAK2/CCL21/CCL23/CCL8
SC	GOBP_CELLULAR_RESPONSE_TO_REACTIVE_OXYGEN_SPECIES	136	0.49251	3.04319	0.00239808	0.00887008	SOD1/AKR1C3/CD36/APEX1/PINK1/PRDX1/OSER1/PRDX5/FBLN5/PRDX2/ANXA1/PARK7/NQO1/PDCD10/PCNA/PDK2/RACK1/TXN/NFE2L2/CCS/CAT/RPS3/ROMO1/PPIF/PRDX3/TREX1/MMP2/SIGMAR1/SOD3/MPV17/AQP1/GLRX2/ABL1/EGFR/BNIP3/MAP1LC3A/STK25/H19/SIRPA/ZNF580/SETX/FOXO3/RELA/PDGFD/HSF1/TRAP1/ENDOG/PXN/AXL/KLF2/IL18BP/PKD2/RHOB/NET1/AKT1/RIPK1/IMPACT/CYP1B1/STAT6/BECN1/EDN1/JUN/SIRT1/MAP3K5/PDE8A/TPM1/MMP9/CAMKK2/AIFM1/PDGFRA/A…
SC	GOBP_INTERLEUKIN_6_PRODUCTION	157	0.271669	1.7455	0.00240964	0.00887008	AKIRIN2/CD36/HMGB1/HSPD1/RABGEF1/LPL/CAPN2/LEP/XBP1/HLA-B/AIF1/CD74/ZBTB20/PYCARD/GAS6/TWIST1/RAB7B/SIRPA/PTPN11/GBA/CYBA/TYROBP/HYAL2/DHX9/SPON2/BANK1/CEBPB/IL16/KLF2/LBP/APP/MAPKAPK2/RIPK2/PTPN6/IL17D/MYD88/TREM2/CD47/STAT3/ARID5A/TICAM1/CSK/IFIH1/CD200/TLR4/LGALS9/NLRX1/ARHGEF2/SYK/IL33/TNFAIP3/ARRB1/LILRB4/DDX58/AGER/NOD1/LILRB2/MBP
SC	GOBP_PHOSPHATIDYLINOSITOL_METABOLIC_PROCESS	157	0.285646	1.8353	0.00240964	0.00887008	DPM3/PI4KB/INPP5K/CDIPT/GPAA1/PIGF/IP6K2/PIGC/PIGZ/MTMR3/DPM2/INPP1/PTEN/PDGFRB/PIGU/PIP4K2B/PI4K2A/PLCD1/CSF1R/MTMR10/IP6K1/DPM1/PIGV/FIG4/MTMR2/TMEM150A/PIGK/PIGS/PIP4K2A/OCRL/PIK3R1/PLEK/PGAP2/VAC14/MBOAT7/UVRAG/EFR3A/SACM1L/INPPL1/PGAP3/LPGAT1/PIK3CA/SOCS2/BECN1/PIK3R4/ITPKC/MTM1/MTMR6/PI4KA/SOCS1/MPPE1/PDGFB/FGF2/PIP5K1B/BMX/HTR2B/SOCS3/PIGM/PI4K2B/PIP5K1C/PIP4K2C/INPP5A/PIGT/PIKFYVE/SOCS5/P…
SC	GOBP_FATTY_ACID_BIOSYNTHETIC_PROCESS	157	0.3318	2.13185	0.00240964	0.00887008	NDUFAB1/AKR1C3/ACADVL/EIF6/GPX4/PTGES3/GSTP1/CBR1/LPL/NR1H3/MIF/ANXA1/XBP1/ELOVL1/HSD17B8/INSIG1/MGLL/ELOVL5/FABP5/ACSM5/CD74/OXSM/GSTM4/MCAT/ACLY/TECR/LTC4S/FASN/HPGDS/PRKAG1/FADS3/SCD/PNPLA8/MECR/MLXIPL/PTGES2/ACOT4/NR1H2/PTGDS/ERLIN1/AVP/GSTM2/SCAP/PDK4/APOC1/QKI/ABCD2/ELOVL3/PRKAB2/ACOT7/LPGAT1/EDN1/RGN/SIRT1/DECR2/ACACB/PIBF1/THNSL2/ERLIN2/ABCD3/PTGES/GSTM1
SC	GOBP_RNA_MODIFICATION	157	0.33553	2.15582	0.00240964	0.00887008	LARP7/TRMT112/ALKBH3/HSD17B10/EMG1/DALRD3/NSUN5P2/SSB/NHP2/METTL5/TRMT10C/NOP10/RBM15B/DNAJB11/MEPCE/ELP5/DPH3/HNRNPAB/ALKBH5/URM1/PCIF1/ZC3H13/WTAP/FTSJ3/TRMT6/TSR3/FTSJ1/TRMO/RNMT/CBLL1/TRMT1/DKC1/KTI12/NSUN5/METTL1/APOBEC3C/TRMT61B/DUS1L/THUMPD3/PUSL1/TRMT2A/HENMT1/ELP3/GAR1/TRMT1L/FBL/MRM3/TRMT13/TYW1/TPRKB/NUDT16/ALKBH1/TRMT61A/CTU2/TFB2M/TYW3/RPUSD3/CTU1/OSGEPL1/PUS3/RPUSD1/DUS2/DUS3L/MRM2
SC	GOBP_POSITIVE_REGULATION_OF_HEMOPOIESIS	157	0.358301	2.30212	0.00240964	0.00887008	XRCC6/HMGB1/HAX1/LGALS1/RHOA/PPP2R3C/ANXA1/HLA-DRA/XBP1/BAD/HLA-DRB1/CTNNBIP1/CD74/TGFBR2/AP3D1/LGALS3/BCL6/GAS6/MDK/ZFP36L1/SOX4/FADD/ZMIZ1/TYROBP/KLF10/FOXO3/ADA/AP3B1/PRKDC/CD83/HSF1/STAT5B/HCLS1/ZBTB16/AXL/PCK1/CD4/FES/ID2/PCID2/RIPK1/TRIB1/CSF1/RIPK2/TMEM64/IL15RA/RB1/EVI2B/TREM2/ZBTB1/CCL19/SART1/CD86/SASH3/PTPRC/CCR1/ACIN1/LGALS9/HLX/SOCS1/ZBTB7B/NOTCH2/FOS/RARA/SYK/SLC9B2/KITLG/NFKBIZ/LIL…
SC	GOBP_MYELOID_CELL_HOMEOSTASIS	157	0.453013	2.91065	0.00240964	0.00887008	SOD1/CEBPG/HMGB1/SMAP1/PRDX1/TMEM14C/SLC25A5/RBFOX2/STAT1/ANXA1/RPS6/RPS19/ARID4A/B2M/KMT2E/EPAS1/HCAR2/MAFB/UBA5/FAM210B/LYAR/TGFBR3/HSPA1A/BPGM/BCL6/CITED2/RPS17/ALAS1/UFL1/ZFP36L1/SLC25A38/NCSTN/DMTN/MAPK14/RPS14/ISG15/BAP1/HIPK2/CDK5RAP3/ADGRF5/RPS24/FOXO3/PRKDC/HMGB2/HOXA5/STAT5B/HCLS1/THRA/AXL/KLF2/JAM3/SH2B3/ID2/BMP4/ZBTB7A/DNASE2/PRMT1/XKR8/GPI/HSPA9/ETV2/RB1/LDB1/STAT3/ACVR2A/KLF13/HMOX1…
SC	GOBP_ACTIN_FILAMENT_BUNDLE_ORGANIZATION	157	0.494468	3.17701	0.00240964	0.00887008	ITGB5/LIMCH1/HSP90B1/ITGB1BP1/ITGB1/RDX/RHOA/WASF2/RAC1/PFN1/MKKS/PDLIM1/CALD1/RHOC/PDCD10/S100A10/INPP5K/FAM171A1/SORBS1/LIMA1/FERMT2/AIF1/ACTN1/ACTG1/ADD1/CORO1B/PFN2/EPS8/MARCKS/RHOD/SMAD3/SYNPO/SFRP1/TESK1/DMTN/DLC1/ABL1/BBS4/TJP1/NRP1/ZYX/MYOC/BAG4/SORBS3/LPAR1/FLNA/AIF1L/DPYSL3/TNFAIP1/ID1/LCP1/ROCK1/EZR/PXN/PPFIA1/SYNPO2/SWAP70/TGFBR1/RGCC/S1PR1/PAK1/PIK3R1/PLEK/CUL3/ROCK2/RAPGEF3/PLS3/FAM…
SC	GOBP_HINDBRAIN_DEVELOPMENT	149	0.279722	1.76777	0.00241546	0.00887008	GNPAT/ITGB1/ATIC/MTPN/FZD4/HNRNPD/HSPA5/NFIB/CKB/RBFOX2/UQCRQ/CRK/PSMG1/MAFB/AIF1/SDF4/DIXDC1/B4GALT2/WLS/MDK/NCSTN/DLC1/ABL1/RERE/CDK5/PTPN11/NAGLU/GBA/ARCN1/XRCC1/MT-CO1/KAT2A/AHI1/OGDH/CLP1/MT-ND4/BCL2/ARL13B/CRKL/MAP2K1/TTLL1/SLC25A46/ATRN/SEC24B/HES1/LDB1/CTNNB1/CEP290/ATF2/HOXB2/GDF10/SMAD1/HOXB3/FGF2/AGTPBP1/PLXNA2
SC	GOBP_POSITIVE_REGULATION_OF_LIPID_METABOLIC_PROCESS	149	0.348188	2.20046	0.00241546	0.00887008	STOML2/CD81/CREBL2/NR1H3/CAPN2/CES1/ANXA1/DGAT2/CCDC3/SORBS1/PNPLA2/ELOVL5/DAB2/CD74/ADM/CTDNEP1/ZBTB20/TWIST1/ADIPOQ/PDGFRB/POR/ACSL3/ABHD6/PPARG/ADGRF5/MLXIPL/NR1H2/FGF1/AVP/ABHD5/APOE/SCAP/APOC1/AKT1/ABCD2/AADAC/CHP1/SCARB1/BMP6/TEK/MTOR/SREBF1/LPGAT1/SIRT3/CCL19/IRS2/NR1D1/RGN/PIK3R4/FGR/CDC42/AGT/P2RY12/FABP3/PRKD1/PDGFRA/PDGFB/FGF2/AGTR1/HTR2B/CCL21
SC	GOBP_SPROUTING_ANGIOGENESIS	149	0.395215	2.49766	0.00241546	0.00887008	CIB1/ITGB1BP1/ITGB1/RHOA/VEGFB/ANXA1/NAXE/PDCD10/JAK1/SRPX2/PARVA/JMJD8/MMRN2/MAP2K5/GLUL/RAMP2/RSPO3/ENG/CLEC14A/ABL1/PKM/TJP1/NRP1/LOXL2/THBS1/HDAC7/FGF1/MAP3K3/PLK2/KLF2/APLNR/RECK/FBXW7/VEGFD/ITGA5/BMP4/ANGPT1/AKT1/MEOX2/STARD13/ACVRL1/TEK/NOTCH1/HDAC5/KDR/KLF4/EFNB2/HMOX1/CDC42/SLIT2/VEGFC/ADGRA2/SRF/SMAD1/FGF2/AGTR1/RNF213/RHOJ
SC	GOBP_REGULATION_OF_ACTIN_FILAMENT_LENGTH	149	0.471319	2.97862	0.00241546	0.00887008	HAX1/RDX/BRK1/MTPN/RHOA/ARPC1A/PFN1/ARPC3/SNX9/MKKS/FLII/CAPZB/DSTN/SPTBN1/GSN/ARPC4/CFL2/LIMA1/TMSB4X/ARPC5L/CYFIP1/BIN1/WDR1/ARPC2/CDC42EP2/ADD1/TWF2/PFN2/ARHGAP18/EPS8/CDC42EP4/ARF6/CXCL12/CAPZA1/GRB2/CTTN/PYCARD/SPTAN1/DBN1/DMTN/MLST8/RASA1/BBS4/TMSB10/BAG4/CAPG/LMOD1/ESAM/KANK1/COTL1/CDC42EP1/TMOD1/KANK4/ARHGAP35/HCLS1/SWAP70/TWF1/KANK3/DBNL/CORO1A/ARPC1B/PLEK/NCK1/SVIL/SSH3/FCHSD2/MTOR/EVL/…
SC	GOBP_RESPONSE_TO_NUTRIENT	150	0.335675	2.12181	0.00242131	0.00887008	AKR1C3/GPX1/GNPAT/DAD1/MAP1B/SNW1/LPL/ASS1/ACSL1/CDKN2B/MGMT/STAT1/TSPO/A2M/LEP/XBP1/NQO1/PDK2/CCND1/CAT/SRSF2/FOLR2/POSTN/TGFBR2/ATP2B1/SFRP1/GAS6/ADIPOQ/POR/NCOA1/GNAI2/ALAD/OXCT1/PPARG/OGT/SFRP2/USF2/HSF1/AGL/CDKN2D/FES/COL1A1/ERCC1/RXRA/PIM1/FKBP1B/PENK/CYP1B1/ALPL/SPP1/MTOR/CYBB/BECN1/CXCL10/HMOX1/VCAM1/SNAI2/CYP26B1/SRF/SLC16A1/TFRC/RARA/MN1
SC	GOBP_REGULATION_OF_MICROTUBULE_CYTOSKELETON_ORGANIZATION	150	0.390711	2.4697	0.00242131	0.00887008	CHMP3/CIB1/CHMP2A/RHOA/MAP1B/RAC1/CDK2AP2/RANGRF/DRG1/MAPRE1/CHMP2B/PARP3/RPS3/DCTN1/CLTC/ARL3/ARHGEF7/CHMP1A/ARL2/DIXDC1/CHMP6/RASSF1/HSPA1A/CKAP5/RAE1/SLAIN2/EML3/ABL1/CHMP5/MID1/CDH5/CHMP4A/CHMP7/HNRNPU/PDCD6IP/TPR/ROCK1/PAFAH1B1/CHMP4B/FES/PHLDB1/PAK1/FKBP4/CDK5RAP2/MAP9/AKAP9/MAP1A/BICD2/CLIP3/PRUNE1/CDKN1B/EFNA5/FAM107A/MPDZ/NUMA1/MAPRE2/CAMSAP2/GIT1/GAS2L1/GBA2/TBCD/PHLDB2/SNCA/ARHGEF2/CKA…
SC	GOBP_RECOMBINATIONAL_REPAIR	152	0.272476	1.73235	0.00243902	0.00887008	MORF4L1/RPA1/MORF4L2/YY1/MAGEF1/PSMD14/RPA3/TERF2IP/ACTB/MEAF6/NSMCE1/RPA2/SWI5/MCM7/MCM3/UBE2N/KAT5/RAD21/NUCKS1/VPS72/NIPBL/PARP1/NBN/ERCC5/WDR48/MCM6/DMAP1/SFPQ/KDM1A/XRCC1/FEN1/SPIDR/PPP4C/HELQ/MRGBP/ACTR2/RECQL/NABP2/REV3L/MAD2L2/RBBP8/MMS19/YEATS4/ACTL6A/ING3/RNF138/RUVBL2/SLX1A/SETD2/EPC2/MUS81/SIRT6/WRAP53/TP53BP1/MCM5
SC	GOBP_BRANCHING_MORPHOGENESIS_OF_AN_EPITHELIAL_TUBE	152	0.274537	1.74545	0.00243902	0.00887008	PHB2/GPC3/HOXB7/ILK/CLIC4/COL4A1/CTNNBIP1/AR/TGFBR2/PPP1CA/MDK/ENG/ABL1/NRP1/CTSH/FKBPL/EXT1/SPRY1/SIX1/SFRP2/HOXA5/FGF1/PLXND1/YAP1/BCL2/RASIP1/PKD2/GNA13/PAK1/BMP4/LRP5/SPRY2/EDNRA/CSF1/MKS1/NOTCH1/KDR/CTNNB1/BMP2/DAG1/EDN1/SLIT2/AGT/BTRC/ACVR1/SRF/MYC/DDR1/SIRT6/AREG/FGF10/LGR4/FGF2
SC	GOBP_NEGATIVE_REGULATION_OF_SECRETION	158	0.328017	2.10243	0.00243902	0.00887008	VAMP3/PNKD/JAGN1/NDUFAF2/RAB7A/PTGER3/MAOB/ATP9A/RABGEF1/ADRA2A/NR1H3/ANXA1/LEP/CRY2/NMB/DPH3/UCP2/CD74/VAMP8/SERGEF/SFRP1/PIM3/ADIPOQ/REST/GNAI2/HADH/INHBB/WNK1/PTPN11/OXT/TNFRSF1A/CRHBP/HLA-F/ADA/STK39/NPY5R/PPP3CA/APOE/PFKL/AVPR2/ACVR1C/KLF7/ERP29/FKBP1B/RHBDF1/RAP1A/SLC30A1/NOTCH1/TNFRSF1B/SREBF1/EDN1/FMR1/CD200/CRY1/HMOX1/BCR/GJA1/RAB11FIP5/LGALS9/SNCA/FRMD4A
SC	GOBP_HISTONE_METHYLATION	151	0.33651	2.13039	0.00243902	0.00887008	NELFE/TRMT112/SNW1/PWP1/PAF1/WDR61/PRMT2/DPY30/PIH1D1/MCRS1/IWS1/RNF20/ATRX/ARID4A/LMNA/KMT2E/SMYD2/COPRS/RTF1/CTR9/PHF1/CHTOP/NNMT/PRMT5/NTMT1/SETD6/WDR5/KMT5B/KDM1A/SETD5/OGT/SMYD3/PRDM2/PHF20/NFYB/EED/PAGR1/KMT2C/PRDM4/FBL/HCFC1/PRMT1/SETMAR/SETD3/MTF2/CXXC1/BRD4/PYGO2/RLF/CTNNB1/SMYD5/SIRT1/KANSL2/JMJD4/SETD2/PAXBP1/ARID4B/NFYC/RRP8/EZH1/MEN1/SUV39H1/PHF19/NFYA/N6AMT1/TTLL12/ASH1L/WDR82
SC	GOBP_CHROMATIN_ASSEMBLY_OR_DISASSEMBLY	158	0.335466	2.15018	0.00243902	0.00887008	NDN/ANP32B/CDKN1C/PAF1/NAP1L4/ATRX/DAXX/NPM1/CENPW/POLE3/TRIM28/CTR9/MIS18A/DNAJC9/MPHOSPH8/MBD2/SART3/BAZ1A/ASF1A/RSF1/SMARCD2/NAP1L1/HIRIP3/SMARCE1/CTBP1/KDM1A/SSRP1/HMGB2/FAM172A/SMYD3/TPR/TSPYL1/UBN1/SMARCC1/SCMH1/BRD2/SET/ITGB3BP/TSPYL4/NAP1L5/TSPYL2/SMARCD3/RB1/HDAC5/PIK3CA/SIRT1/CBX3/SAMD1/TLK1/ZNFX1/SMARCA5/RRP8/CHD3/CABIN1/SIRT6/EZH1/SUV39H1/CHAF1A/PARP10/TSPYL5/SMARCC2/SMCHD1/BAHD1/ATF7…
SC	GOBP_POSITIVE_REGULATION_OF_CELL_GROWTH	152	0.341945	2.17402	0.00243902	0.00887008	CIB1/MTPN/RHOA/MAP1B/EXOSC4/GOLGA4/IST1/MUL1/DNPH1/EIF4G2/PSMD10/RAB11A/CYFIP1/DERL2/IGF1/ITSN2/PLAA/TWF2/EIF4G1/CXCL12/MAP2K5/USP47/SDCBP/SFRP1/DBN1/NDEL1/EGFR/TEAD1/NRP1/CYBA/ADNP/TAF9B/SFRP2/GDI1/PAFAH1B1/FN1/YAP1/BCL2/AVP/TGFBR1/DBNL/DDX49/PARP2/CRABP2/TRIM32/AKT1/BRAT1/MACF1/SMURF1/CDKN2AIP/CXCR4/EFNA5/KLHL22/EXOSC9/TRPV2/SHTN1/S100A9/EDN1/ZFYVE27/NEDD4L/CDC42/ADNP2/SRF
SC	GOBP_STEROL_METABOLIC_PROCESS	152	0.345435	2.1962	0.00243902	0.00887008	SOD1/HDLBP/ACADVL/FDFT1/SNX17/ACAA2/NSDHL/CYB5R1/NPC2/CES1/VLDLR/TM7SF2/LEP/DGAT2/SMPD1/CYB5R3/EBP/PMVK/NFE2L1/CAT/LIMA1/INSIG1/CEBPA/FDPS/EPHX2/ACLY/MBTPS1/DHCR7/POR/TSKU/OSBPL1A/DHCR24/GBA/LIPE/FGF1/ERLIN1/LIPA/IDI1/ABCA5/APOE/SCAP/FDX1/APP/SREBF2/CYP27A1/LSS/RXRA/LRP5/STARD3/SCARB1/ARV1/CYP1B1/ABCA1/SREBF1/LBR/GBA2/PLPP6/CYP21A2/CYP26B1/ERLIN2/G6PD/LPCAT3/CH25H/FDXR/SQLE/LDLRAP1/LCAT/CYP11A1/I…
SC	GOBP_GRANULOCYTE_MIGRATION	151	0.34745	2.19964	0.00243902	0.00887008	RARRES2/CD99/JAGN1/RAC1/BSG/XG/CD99L2/ANXA1/CKLF/SRP54/PPIA/WDR1/C1QBP/PPIB/CD74/RHOG/MPP1/LGALS3/PECAM1/MDK/CSF1R/C3AR1/SAA1/CCL13/THBS4/GBF1/THBS1/CCL14/AKIRIN1/IL1R1/JAM3/LBP/CCL18/FCER1G/CSF1/ITGB2/BST1/RAC2/CCL3/CCL4/CMKLR1/SLAMF8/MYD88/DNM1L/TNFAIP6/S100A9/CCL19/EDN1/PTGER4/CXCL10/SLIT2/CCL2/MIR223/SYK/S100A8/CCL21/PPBP/CCL23/CCL8/CD300A/ITGA1/PIP5K1C/DPP4/MCU/CXCL2/CXCL9/PREX1/S100A12/MAPK…
SC	GOBP_GOLGI_ORGANIZATION	158	0.357387	2.29067	0.00243902	0.00887008	RAB2A/SURF4/VTI1B/GORASP2/TMED10/OPTN/LMAN2/NSFL1C/GOLGB1/VPS51/PDCD10/LMAN2L/HIKESHI/TMED1/RAB1A/ARHGEF7/PLEKHM2/ARL1/STX18/USO1/GOLPH3/CSNK1A1/LMAN1/YWHAZ/HUWE1/GOLGA5/STX16/PRMT5/PI4K2A/VAMP4/STX6/STK25/YIPF5/SEC16A/GBF1/DYNC2H1/STX5/BAG5/TMED7/TMED2/VRK1/VMP1/COG5/MAP2K1/AKAP9/CUL7/RAB30/ARHGAP21/GORASP1/ZW10/OBSL1/COG4/ATL3/HTT/MAP2K2/CAMSAP2/GOLPH3L/CDC42/TICAM2/TMED9/GOLGA8A
SC	GOBP_TRANSPORT_ALONG_MICROTUBULE	152	0.360919	2.29465	0.00243902	0.00887008	SOD1/KIF5B/UBB/HSPA8/UXT/SNAPIN/MAP1B/IFT43/IFT57/BLOC1S1/IFT27/AP3S1/UCHL1/COPG1/HSPB1/ARMCX3/SSNA1/DYNC1I2/FLOT2/DCTN1/RAB1A/ARL3/RAB6A/HSBP1/IFT52/ARL8B/AP3D1/IFT46/BLOC1S4/BAG3/NDEL1/PURA/DTNBP1/SFPQ/RHOT2/COPG2/KIFAP3/KIF3B/AP3B1/HNRNPU/DYNC2H1/TRAK2/PAFAH1B1/LAMP1/ARL8A/TRAK1/SUN1/APP/FYCO1/MAP1A/DST/BICD2/CLIP3/LRPPRC/FBXW11/ARHGAP21/RHOT1/HTT/PEX14/BLOC1S2/CDC42/AP3M1/TTC30A/ACTR10/WASF1/…
SC	GOBP_CARBOHYDRATE_CATABOLIC_PROCESS	152	0.361915	2.30098	0.00243902	0.00887008	PGD/NUDT5/ENO1/EIF6/GPD1/PGK1/ALDOA/PGM1/TPI1/PYGL/PFKFB1/STBD1/PYGB/BAD/LDHA/GLB1/GAPDH/NUPR1/JMJD8/IGF1/ALDOC/PPP1CA/TREX1/ARL2/ZBTB20/DERA/BPGM/PGAM1/HEXB/NAGA/PKM/GALT/PPP1CB/PRKAG1/HK1/DDIT4/GAA/MLXIPL/OGT/OGDH/ABHD10/AGL/GM2A/RB1CC1/CTBS/GALK1/PFKL/APP/FBP1/PGAM2/LRP5/ZBTB7A/INSR/GPI/IDNK/RPE/NEU1/PFKP/TREH/STAT3/GIT1/SLC25A12/ADPGK
SC	GOBP_CYTOKINESIS	158	0.369433	2.36788	0.00243902	0.00887008	CHMP3/CETN2/SH3GLB1/POLDIP2/CHMP2A/ANXA11/JTB/RHOA/CALM1/KLHDC8B/SNX9/ARF1/IST1/PRPF40A/VPS4A/MYH10/SPTBN1/RHOC/DCTN3/CALM2/CHMP2B/RAB11A/MYH9/ARL3/CHMP1A/UNC119/CALM3/CHMP6/SON/LZTS2/PKP4/RASA1/BBS4/CHMP5/STAMBP/CHMP4A/BCL2L1/GIPC1/CHMP7/KIF3B/PDCD6IP/ROCK1/CHMP4B/ACTR2/ACTR3/PLK2/RHOB/SNX33/PIN1/MAP9/BIN3/CUL3/KLHL9/ROCK2/SVIL/CUL7/UVRAG/PLEC/ZFYVE19/BIRC6/GIT1/BECN1/SNX18/PKN2/PIK3R4/CDC42/CSP…
SC	GOBP_NEGATIVE_REGULATION_OF_CYTOSKELETON_ORGANIZATION	151	0.390242	2.47055	0.00243902	0.00887008	CIB1/RDX/MTPN/WASF2/MAP1B/PFN1/MKKS/FLII/CAPZB/SPTBN1/GSN/MAPRE1/INPP5K/NPM1/LIMA1/TMSB4X/ADD1/CORO1B/NUBP1/ARHGEF7/TWF2/PFN2/EPS8/CAPZA1/SPTAN1/DMTN/DLC1/BBS4/TMSB10/GMFG/TJP1/MYOC/MID1/CAPG/LMOD1/CDH5/KANK1/KAT2A/RBM14/TMOD1/KANK4/PPFIA1/SWAP70/TWF1/GMFB/KANK3/CORO1A/S1PR1/PIK3R1/FKBP4/CDK5RAP2/SVIL/CLIP3/SSH3/CAMSAP2/PIK3CA/MYADM/TRIOBP/TBCD/SLIT2/PHLDB2/CORO2B/SNCA/ARHGEF2/CKAP2/TRIM37/STMN2/…
SC	GOBP_ADAPTIVE_THERMOGENESIS	158	0.398239	2.55251	0.00243902	0.00887008	ADIPOR2/RBPJ/CD36/NRDC/CAV1/GNAS/MFN2/ACOT13/ATF4/SLC25A5/ACSL1/DDIT3/NR1H3/FABP4/LEP/TFE3/DECR1/ALDH1A1/PEMT/FH/EPAS1/RHEB/FABP5/BSCL2/UCP2/G0S2/ADIPOR1/SLC25A4/CIDEA/HDAC3/ADIPOQ/MFAP2/ADAMTS5/HADH/IP6K1/ABHD6/DHRS7B/SCD/OXT/NPR3/ADRB2/KDM1A/HNRNPU/OGT/NOVA1/NR1H2/ID1/HSF1/CEBPB/THRA/HOXC10/LNPEP/ELOVL3/PRKAB2/PLCL2/GADD45G/CXCR4/PDGFC/ALPL/CMKLR1/NOTCH1/RB1/TLE3/ZNF423/TRPV2/STAT6/NR1D1/TLR4/A…
SC	GOBP_ESTABLISHMENT_OF_RNA_LOCALIZATION	158	0.431617	2.76645	0.00243902	0.00887008	CETN2/YBX1/RFTN1/MRPL18/TST/TOMM20/NCBP2/FLOT1/SLBP/THOC7/RANBP2/RAN/MYO1C/SSB/IWS1/SEC13/SRSF3/NPM1/SRSF7/NUTF2/RBM15B/SARNP/UPF3B/KPNB1/ALKBH5/TGFBR2/DDX19B/NXT1/YTHDC1/PABPN1/POLDIP3/KHDRBS1/UPF2/DDX39B/CKAP5/HNRNPA1/CHTOP/RAE1/AGFG1/NUP214/ZFP36L1/DDX39A/ZC3H11A/SMG7/SRSF1/UPF3A/ENY2/SMG5/AAAS/DHX9/THOC2/GLE1/TPR/HSF1/EIF5A/HNRNPA2B1/PCID2/UPF1/THOC1/QKI/NUP54/BICD2/NUP153/LRPPRC/NUP85/ZC3H3/…
SC	GOBP_POSITIVE_REGULATION_OF_CELLULAR_PROTEIN_CATABOLIC_PROCESS	151	0.494475	3.13044	0.00243902	0.00887008	VCP/BCAP31/CAV1/CD81/PSMC2/HSP90AA1/RDX/PTTG1IP/GABARAP/PSMC5/RBX1/MAGEF1/PSMC3/CLU/PSMC4/RNF185/SUMO1/FBXL5/VPS35/PSMC1/DDRGK1/RACK1/PSMD10/NFE2L2/STUB1/ZFAND2A/NUPR1/HSPBP1/HERPUD1/DAB2/KEAP1/HECTD1/CEBPA/RNF139/BAG6/MSN/TMEM259/HSPA1A/RNF40/ECSCR/CSNK1A1/PTEN/MKRN2/UBQLN2/PIAS1/SUMO2/CCDC22/LRP1/GBA/UBQLN1/CDK5RAP3/TRIB2/LAPTM5/BBS7/USP5/EZR/APOE/ZER1/DNAJB2/FBXW7/CSNK1E/SGTA/RNF19A/AKT1/DVL1/…
SC	GOBP_REGULATION_OF_EXTRINSIC_APOPTOTIC_SIGNALING_PATHWAY	152	0.516698	3.28506	0.00243902	0.00887008	CTNNA1/GPX1/CAV1/PPP2R1B/GSTP1/PEA15/HTRA2/TIMP3/PRDX2/NOL3/PDIA3/PHIP/PPP2R1A/RBCK1/PARK7/SRPX/LMNA/IGF1/AR/G0S2/PPP1CA/FGFR1/STRADB/MAP2K5/RNF34/CTTN/LGALS3/HSPA1A/PYCARD/SFRP1/PTEN/ZMYND11/TMBIM1/GPER1/PSME3/SIAH2/NRP1/FADD/TNFSF12/ITM2C/HYAL2/BCL2L1/RELA/THBS1/ITGAV/TNFSF10/ZC3HC1/SFRP2/HMGB2/YAP1/TCF7L2/WWOX/BCL2/ITGA6/RB1CC1/TGFBR1/BMP4/AKT1/RIPK1/MCL1/BCL2L12/IFI6/TNFRSF12A/FEM1B/BIRC6/DEP…
SC	GOBP_OLEFINIC_COMPOUND_METABOLIC_PROCESS	156	0.310859	1.99276	0.00246305	0.00887008	AKR1C3/GPX1/DHRS3/DHRS4L2/GPX4/PTGES3/AKR1C2/GSTP1/CBR1/ADH1B/AKR1C1/RBP4/RDH5/DGAT1/DGAT2/ACAA1/ELOVL1/DHRS4/ALDH1A1/PNPLA2/MGLL/ELOVL5/DAB2/EDNRB/RETSAT/ACOT8/ADM/EPHX1/EPHX2/ADH1C/REST/SCP2/ABHD12/PNPLA4/ABHD6/PNPLA8/ADH1A/LIPE/DHRS7/PTGES2/PTGDS/STAT5B/FAAH/GSTM2/RDH11/RDH14/STARD3/ELOVL3/ALDH1A3/BMP6/CYP1B1/BMP2/H6PD
SC	GOBP_ACTIN_FILAMENT_POLYMERIZATION	156	0.466775	2.99227	0.00246305	0.00887008	HAX1/RDX/MTPN/RHOA/ARPC1A/RAC1/PFN1/ARPC3/SNX9/MKKS/FLII/CAPZB/SPTBN1/GSN/ANG/MSRB1/ARPC4/TMSB4X/ARPC5L/CYFIP1/BIN1/AIF1/ARPC2/CDC42EP2/MSRB2/ADD1/TWF2/PFN2/ARHGAP18/EPS8/CDC42EP4/ARF6/CAPZA1/GRB2/CTTN/PYCARD/SPTAN1/TTC17/DBN1/DMTN/MLST8/ABL1/RASA1/BBS4/TMSB10/BAG4/CAPG/LMOD1/WASF3/ESAM/KANK1/COTL1/WASL/CDC42EP1/TMOD1/KANK4/HCLS1/TWF1/KANK3/DBNL/CORO1A/ARPC1B/NCK1/SVIL/SSH3/FCHSD2/FAM107A/MTOR/EV…
SC	GOBP_REGULATION_OF_MACROAUTOPHAGY	156	0.508797	3.26165	0.00246305	0.00887008	ATP6V0E1/SH3GLB1/POLDIP2/PINK1/OPTN/BNIP3L/ATP6V1G1/ATP6V1E1/SLC25A5/CAPNS1/SNX6/UCHL1/VPS26B/VPS35/ATP6V0B/RALB/GAPDH/RHEB/NUPR1/FEZ2/VDAC1/NRBP2/ATG5/WAC/DCN/SLC25A4/PHF23/EXOC7/TBC1D25/ATP6V0C/UBQLN2/SCOC/PIP4K2B/BAG3/SESN1/BNIP3/CDK5/LARP1/GBA/EXOC1/MAP3K7/UBQLN1/ADRB2/CHMP4A/ATG12/SUPT5H/HSPB8/SESN2/CHMP4B/ATP6V1H/ATP6V0E2/PIP4K2A/VPS26A/SNX5/MOAP1/ATP6V0D1/FYCO1/AKT1/CAPN1/RIPK2/WIPI1/ATP6V…
SC	GOBP_HOMOPHILIC_CELL_ADHESION_VIA_PLASMA_MEMBRANE_ADHESION_MOLECULES	170	-0.29739	-1.67813	0.00246457	0.00887008	CDHR3/PCDHB11/PCDHGA8/PCDHB1/PCDHGB6/PCDHGA6/FAT3/PCDHA4/PCDHA10/PCDHB13/CDH1/PCDHB9/CDH7/PCDHA9/CDH3/CDH6/CNTN2/CDH18/CDH17/MYPN/SDK2/PCDHGA1/KIRREL3/PCDH11X/NECTIN4/CEACAM5/CDH12/PCDHB16/CDH15/CDHR4/PCDHB2/PCDHGA5/DSCAM/CDH8/PTPRT/CDH26/PCDH11Y/IGSF11/DSC3/DSCAML1/PCDHB14/CEACAM1/CDH9/DSC2/PCDHA5/CEACAM6/CDH16/CDHR1/CNTN4/CDH22/PTPRR/PCDH10/CDH4/DSC1/CDH10/IGSF9/CLSTN3/PCDHGA9/CELSR3/DCHS2/CDHR…
SC	GOBP_REGULATION_OF_RESPONSE_TO_WOUNDING	160	0.2505	1.60911	0.00247525	0.00887008	CD36/ITGB1/CAV1/VKORC1/ADRA2A/SERPING1/PRDX2/ANXA1/XBP1/PTPRF/NFE2L2/CRK/FERMT2/ACTG1/HRAS/GRN/SMAD3/PTEN/MDK/PLPP3/STK24/NDEL1/DMTN/SRSF6/KANK1/CD34/THBS1/FLNA/CD9/CERS2/APOE/SH2B3/MAP2K1/ENPP4/C1QTNF1/TNFRSF12A/SMOC2/FKBP1B/CXCR4/SPP1/ACTA2/MTOR/KLF4/GIT1/EDN1/THBD/ADAMTS18/ANO6/PHLDB2/ST3GAL4/PDGFRA/PDGFB/TSPAN8/TNFAIP3/FGF2/FAP/PTPRS
SC	GOBP_LIPID_HOMEOSTASIS	160	0.355717	2.28498	0.00247525	0.00887008	RTN4/SURF4/CAV1/FUNDC2/MTCH2/LPL/ORMDL1/ORMDL2/NR1H3/NPC2/CNBP/CES1/FABP4/AKR1C1/LAMTOR1/XBP1/DGAT1/DGAT2/GPAM/LIMA1/PNPLA2/ABHD4/INSIG1/RALY/MYLIP/ANGPTL4/CEBPA/ZBTB20/ORMDL3/EPHX2/EHD1/TSKU/PNPLA4/RCN3/PPARG/GPIHBP1/PNPLA8/ACOX2/GOT1/MLXIPL/USF2/COMMD9/NR1H2/SESN2/ABCA5/ABHD5/APOE/FBXW7/SREBF2/LRP5/ACOX3/ANGPTL8/NR1D2/APOM/SCARB1/TREM2/ABCA1/ACOX1/IRS2/NR1D1/SIRT1
SC	GOBP_NEGATIVE_REGULATION_OF_INFLAMMATORY_RESPONSE	160	0.356184	2.28798	0.00247525	0.00887008	SOD1/PSMA1/GPX1/NDFIP1/PSMB4/SERPINF1/GSTP1/RABGEF1/FYN/NR1H3/VPS35/HLA-DRB1/RPS19/NFKB1/IGF1/GPS2/METRNL/SHARPIN/FNDC4/GRN/SMAD3/MDK/MKRN2/ADIPOQ/MAPK14/GPER1/SAA1/SIRPA/PPARG/GBA/CDH5/TNFRSF1A/ADA/FURIN/PLK2/NPY5R/APOE/CST7/NT5E/NR1D2/TEK/RB1/SLAMF8/TNFAIP8L2/TREM2/TNFRSF1B/TNFAIP6/KLF4/GIT1/NR1D1/PTGER4/CD200/FGR/BCR/PTPRC/ZFP36/NLRX1/MIR223/SYK/TNFAIP3/ACP5/LPCAT3/SOCS3/ELANE/ALOX5/HCK/ASH1L/…
SC	GOBP_NEGATIVE_REGULATION_OF_BINDING	160	0.368791	2.36897	0.00247525	0.00887008	C4orf3/TMBIM6/PEX19/ITGB1BP1/CAV1/SUMO3/SRI/DDIT3/SUMO1/ZNF593/ACTB/PTPRF/PARK7/RACK1/CPNE1/RALB/B2M/TMSB4X/STUB1/MEPCE/CTNNBIP1/DAB2/PPP1CA/CARD16/ADIPOQ/RSF1/DTNBP1/CAMK1/HABP4/DHRS7B/ADRB2/KDM1A/TFIP11/IFI16/ADNP/GTF2F1/ID1/ROCK1/LRPAP1/IFIT2/NFKBIA/PPP3CA/DNAJB2/ADAM15/MAD2L2/FBXW7/PIN1/CSNK1E/IFIT1/AKT1/WAPL/DVL1/MDFI/GZMA/HEY1/PEX14/CDKN1A/MSX1/JUN/GTPBP4/HMOX1/TTC36/BTAF1/C9orf72/PDGFB/SLP…
SC	GOBP_CELLULAR_RESPONSE_TO_OXYGEN_LEVELS	160	0.406723	2.61262	0.00247525	0.00887008	TMBIM6/CHCHD2/RBPJ/PHB2/CAV1/PINK1/ENO1/SLC29A1/PGK1/BNIP3L/ACAA2/ATP6V1G1/ATF4/P4HB/NOL3/FOXO1/NDUFS2/BAD/FAM162A/NFE2L2/CCDC115/LMNA/STUB1/EPAS1/MALAT1/NDRG1/RWDD3/EGLN2/CARD16/SFRP1/HILPDA/PTEN/AQP1/TWIST1/CITED2/ZFP36L1/BNIP3/PPARG/HIPK2/UBQLN1/FOXO3/AK4/CD34/ATG7/ATP6AP1/BCL2/ENDOG/PCK1/RGCC/IRAK1/ATP6V0D1/AKT1/ROCK2/VASN/DDAH1/NOTCH1/TREM2/MTOR/CYBB/ATF2/EDN1/TMEM199/STOX1/SIRT1/HMOX1
SC	GOBP_CYTOSOLIC_TRANSPORT	160	0.511264	3.28415	0.00247525	0.00887008	CHMP3/VAMP3/SURF4/KIF5B/VTI1B/RDX/YKT6/RAB7A/ATP9A/SNX6/CES1/VPS26B/VPS35/VPS51/BET1L/SNX3/RHOBTB3/RAB5A/DCTN1/KLHL20/VPS29/CLTC/RILP/WASH3P/DAB2/RAB6A/STX10/SNX12/ARL1/RAB9A/ARL8B/EEA1/SORT1/SRSF10/MSN/TMEM87A/LMAN1/DENND5A/TBC1D23/STX16/ARFIP1/CCDC91/RAB7B/STX6/RNF126/USP7/MTMR2/RAB14/LAPTM5/ARFRP1/GBF1/FLNA/SNX8/MYO1D/SYS1/EZR/STX5/LAMP1/HOOK2/PIP4K2A/VPS26A/ACTR2/SNX5/KIF16B/CORO1A/VPS52/SNX2…
SC	GOBP_POSITIVE_REGULATION_OF_CELLULAR_AMIDE_METABOLIC_PROCESS	160	0.547414	3.51637	0.00247525	0.00887008	SERP1/POLR2G/YBX1/VIM/CSDE1/PINK1/EIF6/YTHDF2/RHOA/HNRNPD/EIF3D/CDC123/CIRBP/CLU/PYM1/CNBP/COA3/EIF4G2/RPS4X/NFE2L2/UQCC2/YTHDF1/NPM1/METTL5/DHX29/USP16/RCC1L/RPS9/TRMT10C/LARP6/C1QBP/PABPC1/UPF3B/SYNCRIP/EEF2/PCIF1/POLDIP3/EIF4G1/KHDRBS1/PICALM/FXR1/RPL5/PAIP1/EIF2B5/MIF4GD/PLXNB2/SOX4/PKM/HABP4/RBM3/EFNA1/EIF3C/UPF3A/NSUN5/LARP1/DNAJC3/YBX3/RPL26/DHX9/RELA/IFNGR1/MPV17L2/THBS1/HNRNPU/PRKDC/EIF2…
SC	GOBP_REGULATION_OF_INTRINSIC_APOPTOTIC_SIGNALING_PATHWAY	160	0.612277	3.93302	0.00247525	0.00887008	TMBIM6/PARL/SOD1/GPX1/VDAC2/NDUFA13/BCAP31/WFS1/CAV1/UBB/PINK1/ENO1/PTTG1IP/BOK/TPT1/FIS1/CREB3/HTRA2/CLU/TRIAP1/P4HB/DDIT3/PTPMT1/MIF/NOL3/XBP1/HSPB1/PARK7/BAD/RACK1/NFE2L2/PPIA/TAF9/RPS3/TXNDC12/HNRNPK/PRKRA/NUPR1/DNAJA1/PPIF/GRINA/HERPUD1/CD44/RPS7/SERINC3/CD74/RRN3/NDUFS3/CXCL12/URI1/ING2/USP47/NONO/SYVN1/HSPA1A/SLC9A3R1/PYCARD/PARP1/PLEKHF1/STYXL1/SFPQ/UBQLN1/YBX3/KDM1A/BCL2L1/RPL26/TAF9B/SF…
SC	GOBP_MULTICELLULAR_ORGANISMAL_SIGNALING	162	-0.301122	-1.68741	0.00248447	0.00887008	SCN3B/CORIN/CNTNAP2/GJC1/CACNG8/GRIK2/ANK3/CHRNB4/TMEM65/SCN8A/SCN1A/SCN7A/SCN1B/CNTNAP1/NUP155/KCNJ3/KCNMB4/NFASC/SCN11A/ITGA2/KCNE1/TNR/KCNH6/CHRM5/P2RX3/CXADR/CACNB2/GLRA1/RNF207/SCN2B/OTOA/KCNJ5/TRPM4/ATP1B2/ATP1A3/CHRNA1/CLDN19/PKP2/SPTBN4/EHD3/GPR35/CACNA1D/RYR2/DSC2/SLC8A1/CACNA1G/CLCN1/KCNE4/ATP2B2/SCN5A/P2RX4/CACNA1C/KCNMB3/ATP2B3/CACNG7/SCN9A/CACNG2/KCNA2/ATP2A1/CACNG3/CACNG5/ATP2A3/KCN…
SC	GOBP_SPHINGOLIPID_METABOLIC_PROCESS	159	0.264831	1.69885	0.00248756	0.00887008	PLPP1/ORMDL1/HTRA2/ORMDL2/PSAP/PPT1/VAPA/PPP2R1A/ASAH1/ELOVL1/SMPD1/PEMT/ENPP2/GLB1/ELOVL5/PPP2CA/SERINC3/ORMDL3/TECR/HEXB/NSMAF/PLPP3/NAGA/GLA/SERINC1/ST6GALNAC6/TM9SF2/FADS3/B3GALT4/GBA/B4GALT3/SUMF1/SMPD2/CERS2/HEXA/GM2A/KDSR/OSBP/SGPP1/SGMS1/ELOVL3/CSNK1G2/ST3GAL1/ARV1/CPTP/NEU1/SIRT3/ST6GALNAC4/GBA2/B4GALT5/CERS6/PRKD3/PRKD1
SC	GOBP_SKELETAL_MUSCLE_ORGAN_DEVELOPMENT	159	0.318362	2.04224	0.00248756	0.00887008	GPX1/MYL6/CAV1/RHOA/FLOT1/ASS1/DDX5/CAV2/VAMP5/CFL2/UQCC2/DDX17/ITGA7/NUPR1/FXR1/MSC/TWIST1/CITED2/MAPK14/CDK5/NR2F2/YBX3/EMD/CNTFR/SIX1/GPC1/HMG20B/BCL2/AKIRIN1/PPP3CA/IGSF8/BIN3/MEF2C/BTG2/SVIL/MEOX2/COPS2/FLNB/NR1D2/PLEC/LEMD2/FOXN2/NOTCH1/RB1/IGF2/CTNNB1/BASP1/DAG1/SKI/MYL6B/MEF2D/MTM1/FGFRL1/CYP26B1/ACVR1/GTF3C5/HLX/GPCPD1/CCNT2/FOS/EGR1/HEYL/ELN
SC	GOBP_POSITIVE_REGULATION_OF_EPITHELIAL_CELL_MIGRATION	159	0.439532	2.81953	0.00248756	0.00887008	CIB1/RTN4/SPARC/ITGB1BP1/HMGB1/RAC1/PFN1/IQSEC1/STAT5A/ANXA1/HSPB1/NFE2L2/SRPX2/ENPP2/GLIPR2/TMSB4X/RAB11A/SASH1/TGFBR2/GRN/FGFR1/ARF6/MAP4K4/AAMP/RRAS/PLPP3/MAPK14/ABL1/PDCD6/NRP1/ZNF580/EPB41L4B/CTSH/CALR/THBS1/HDAC7/SP1/FGF1/MAP3K3/PLK2/RHOB/BMP4/ANGPT1/AKT1/ROCK2/SMOC2/GPI/RIN2/SCARB1/TEK/ATOH8/KDR/MAP2K3/MAPRE2/MTOR/EDN1/JUN/NRP2/SIRT1/HMOX1/FGF7/AGT/VEGFC/ADGRA2/PRKD1/MMP9/BCAR1/PDGFB/FGF10…
SC	GOBP_EPITHELIAL_TO_MESENCHYMAL_TRANSITION	159	0.44078	2.82753	0.00248756	0.00887008	RTN4/RBPJ/PEF1/SDHAF2/DDX5/GLIPR2/FERMT2/DDX17/PPP2CA/DAB2/HNRNPAB/TGFBR2/ADIPOR1/TRIM28/FGFR1/TGFBR3/SDCBP/SMAD3/SFRP1/PTEN/TWIST1/MDK/ENG/S100A4/KLHL12/PDCD6/EFNA1/LOXL2/MCRIP1/WWTR1/BAMBI/FLNA/SPRY1/SFRP2/ROCK1/TCF7L2/MARK1/GSC/TGFBR1/RGCC/ADAM15/MAD2L2/COL1A1/PHLDB1/BMP4/OLFM1/PDCD4/SPRY2/EDNRA/ROCK2/NOLC1/CUL7/ACVRL1/VASN/HEY1/TGFB1I1/NOTCH1/SPRED2/CTNNB1/TMEM100/MTOR/BMP2/WNT11/DAG1/ZNF703/…
SC	GOBP_ELECTRON_TRANSPORT_CHAIN	159	0.667947	4.28476	0.00248756	0.00887008	NDUFAB1/COX4I1/UQCRH/GHITM/CHCHD2/COX6A1/DGUOK/NDUFA2/NDUFB8/NDUFB7/NDUFS5/UQCRFS1/DHRS3/NDUFA13/IDH3B/NDUFV2/COX5B/COX7A2L/PINK1/ISCU/NDUFS6/AIFM2/NDUFA8/COX5A/GPD1/NDUFB9/NDUFV1/SDHAF2/MAOB/NDUFB4/QDPR/NDUFA6/NDUFB6/NDUFA10/NDUFC1/DNAJC15/SURF1/UQCR10/ADH5/UQCRQ/PARK7/NDUFA12/NDUFB10/ASPH/NDUFS2/NDUFA1/NDUFS4/AKR7A2/NDUFC2/ME1/NDUFA4/ETFB/SDHB/NDUFS8/CYC1/ALDH4A1/IMMP2L/COQ9/COX7A1/DLD/NDUFB2/N…
SC	GOBP_POSITIVE_REGULATION_OF_LEUKOCYTE_PROLIFERATION	155	0.310413	1.98042	0.00251256	0.00887008	HMGB1/CD81/MIF/ANXA1/LEP/HLA-E/GPAM/HLA-DPA1/HLA-A/HLA-DPB1/RPS3/AIF1/IGF1/BST2/CD74/TGFBR2/EFNB1/DHPS/PYCARD/BCL6/CSF1R/HLA-DMB/FADD/ADA/STAT5B/CD320/BCL2/TNFSF13B/IL6ST/CORO1A/SLC39A10/GPR183/TNFRSF4/MEF2C/NCK1/CSF1/RIPK2/BST1/PELI1/HES1/MYD88/IGF2/FCGR3A/CD276/CDKN1A/TICAM1/CCL19/IRS2/CD86/TLR4/VCAM1/NFATC2/SASH3/PTPRC/LGALS9/TFRC/SYK/FGF10/CD55/TYK2/CD40/JAK2/KITLG/PDCD1LG2/PNP/AGER/LILRB2
SC	GOBP_ORGANOPHOSPHATE_CATABOLIC_PROCESS	155	0.347	2.21384	0.00251256	0.00887008	VCP/PRDX6/NUDT5/DUT/GDE1/HINT1/GPD1/ITPA/DCTPP1/DNPH1/NEIL2/NT5C/SMPD1/INPP5K/ENPP2/NUDT8/NTHL1/MBD4/HPRT1/DERA/IDH1/INPP1/ABHD16A/PTEN/PLBD1/ACAT1/ABHD12/ABHD6/PNPLA8/UNG/TYMP/PLBD2/MTMR2/ADA/NUDT7/PDE2A/SMPD2/NUDT18/PRTFDC1/SMUG1/NUDT17/OCRL/PDE8B/APOC1/NT5E/ACOT7/NUDT3/GPD1L/SCARB1/NUDT16/UPP1/CNP/PDE4A/NUDT12/PDE8A/PLPP6/ENTPD6/PGM2/PNPLA6/GPCPD1/GDPD3/TDG/SMPDL3A/SMPD4/PLA2G4A/NUDT4/PNP/PLA2…
SC	GOBP_RESPONSE_TO_CORTICOSTEROID	155	0.389545	2.48528	0.00251256	0.00887008	UBE2L3/AKR1C3/NR3C1/CDO1/SERPINF1/RHOA/MAOB/PAM/RAN/ASS1/PFKFB1/A2M/ANXA1/BAD/PCNA/CCND1/GLB1/AIF1/ADM/CALM3/ATP2B1/SLIT3/PARP1/AQP1/RPL27/MDK/ADIPOQ/ENG/POR/ZFP36L1/REST/GPER1/ZFP36L2/ALAD/OXT/GBA/CYBA/DDIT4/FOXO3/GOT1/IGFBP7/HNRNPU/SMYD3/BCL2/AGL/PCK1/COL1A1/PCK2/KLF9/FIBIN/CSN1S1/BMP6/CYP1B1/ALPL/FAM107A/NOTCH1/ERRFI1/MT-ND3/PIK3CA/CYBB/EDN1/CBX3/CASP3/IL1RN/SLIT2/ACVR1/SGK1/ZFP36/AIFM1/FOS/AR…
SC	GOBP_NEURAL_TUBE_DEVELOPMENT	154	0.274557	1.74356	0.00251889	0.00887008	RALA/PFN1/IFT57/CBY1/ITPK1/HECTD1/RPS7/IFT52/ADM/SFRP1/TWIST1/CITED2/ATP6AP2/ZNF358/ZFP36L1/PLXNB2/SOX4/DLC1/ABL1/BBS4/LMO4/LUZP1/CTHRC1/SEMA3C/SFRP2/KAT2A/ARHGAP35/ARL13B/TMED2/GSC/PKD2/TEAD2/TULP3/BRD2/MED12/BMP4/DVL1/SOX17/FKBP8/PHGDH/MKS1/SEC24B/PRKACB/PRKACA/HES1/NOTCH1/DVL3/SKI/CASP3/FZD6/SETD2/SDC4/MTHFD1/RARA/FUZ/PLXNA2/DEAF1/GORAB/RNF220/RARG/PSEN1
SC	GOBP_MALE_SEX_DIFFERENTIATION	161	0.29034	1.86235	0.00251889	0.00887008	CTNNA1/AKR1C3/EIF2S2/UBB/MEA1/CSDE1/BOK/PRDX4/SF1/NCOA4/ATRX/ARID4A/RHOBTB3/CCND1/TFPT/NUPR1/AR/HOXA10/ARID5B/ING2/SFRP1/CITED2/PDGFRB/WDR48/INHBB/DHCR24/NUDT1/YBX3/RAB13/BCL2L1/SFRP2/HMGB2/RNF38/STAT5B/BCL2/TGFBR1/ADAM15/ERCC1/FKBP4/CRKL/ASB1/INSR/BMP6/CYP1B1/HSD17B4/CTNNB1/FNDC3A/ACVR2A/LHCGR/SMAD5/GJA1/ARID4B/PDGFRA/GFRA1/BCL2L2/RARA/FGF10/LGR4/DMRT3/KITLG/PATZ1/GATA6/MMP14/MAMLD1
SC	GOBP_TRNA_METABOLIC_PROCESS	161	0.382482	2.45339	0.00251889	0.00887008	DDX1/GTF3C6/TRMT112/HSD17B10/RTCB/POP7/DALRD3/SSB/ANG/RPP25L/POLR2L/POP5/LAGE3/RPP21/TRMT10C/ELP5/DPH3/POP4/URM1/TRMT6/FTSJ1/TRMO/LRRC47/LSM6/TSEN34/TRMT1/TRPT1/FARSA/KTI12/IARS2/RPP40/ELAC2/METTL1/TRMT61B/WARS2/DUS1L/HARS2/THUMPD3/CLP1/PUSL1/RARS2/EXOSC7/RPP25/EXOSC8/ELP3/TRMT1L/FARS2/TRMT13/TYW1/TPRKB/FARSB/ALKBH1/DICER1/TRMT61A/CTU2/EXOSC9/SARS2/GRSF1/EXOSC10/TYW3/CTU1/OSGEPL1/PUS3/TP53RK/DUS2…
SC	GOBP_ENTRY_INTO_HOST	154	0.397885	2.52675	0.00251889	0.00887008	ITGB5/ITGB1/PHB/CAV1/CD81/LGALS1/BSG/SIVA1/P4HB/GSN/CAV2/RNASEK/HLA-DRB1/FUCA2/SLC1A5/SMPD1/SNX3/DYNLT1/RPSA/IFITM3/SLC52A2/CD74/VAMP8/IFITM2/EXOC7/KPNA3/HSPA1A/SLC3A2/GAS6/IFITM1/EGFR/CTSB/NRP1/NECTIN2/MRC1/HYAL2/CTSL/LY6E/ITGAV/PLSCR1/TNFRSF14/EXOC2/LAMP1/AVP/AXL/CD4/TPCN1/ITGA5/MID2/TRIM26/TNFRSF4/NUP153/WWP2/INSR/TRIM21/UVRAG/SCARB1/TRIM27/CXCR4/SELPLG/WWP1/DAG1/EFNB2/CD86/ANPEP/VPS18/LGALS9/…
SC	GOBP_MEMBRANE_FUSION	154	0.410371	2.60604	0.00251889	0.00887008	CHMP3/VAMP3/ANXA2/VTI1B/YKT6/RAB7A/SNAPIN/NSFL1C/VAPA/VPS4A/ANXA1/CAV2/RABEP1/BET1L/CHMP2B/RCC1L/RAB34/STX12/RAB20/FOLR2/STX10/VPS39/VAMP8/STX18/ARL8B/EEA1/USO1/NAPA/VAMP7/GAS6/HUWE1/STX16/PIP4K2B/MYOF/RAB7B/VAMP4/STX6/YIPF5/NECTIN2/HYAL2/CTSL/RAB13/BNIP1/CD9/RAB8B/RABIF/STX5/PIP4K2A/CORO1A/STXBP1/TBC1D4/STX8/GCA/UVRAG/CHP1/TMEM175/SPESP1/STX7/STX4/DNM1L/GOSR2/VAMP2/SAMD9/SERPINA5/SNAP23/SNAP47/U…
SC	GOBP_NEGATIVE_REGULATION_OF_SUPRAMOLECULAR_FIBER_ORGANIZATION	154	0.424146	2.69352	0.00251889	0.00887008	CIB1/PFDN1/RDX/HSPA8/MTPN/WASF2/MAP1B/PFDN5/PFN1/CRYAB/CLU/MKKS/FLII/CAPZB/SPTBN1/GSN/MAPRE1/INPP5K/LIMA1/TMSB4X/PFDN2/VBP1/ADD1/CORO1B/ARHGEF7/TWF2/PFN2/EPS8/CAPZA1/PFDN4/SPTAN1/DMTN/DLC1/BBS4/TMSB10/GMFG/TJP1/MYOC/MID1/CAPG/LMOD1/CDH5/KANK1/TMOD1/KANK4/PPFIA1/SWAP70/TWF1/GMFB/KANK3/APOE/CORO1A/S1PR1/PIK3R1/FKBP4/CHADL/SVIL/CLIP3/SSH3/EMILIN1/TREM2/CAMSAP2/PIK3CA/MYADM/TRIOBP/TBCD/SLIT2/PHLDB2/C…
SC	GOBP_CELLULAR_RESPONSE_TO_STARVATION	154	0.437465	2.7781	0.00251889	0.00887008	AKR1C3/RRAGA/SH3GLB1/HSPA8/GABARAP/DAP/HSPA5/ATF4/DNAJC15/GABARAPL2/XBP1/FOXO1/EIF2S1/RALB/NFE2L2/MAP1LC3B/GABARAPL1/UCP2/ATG5/WDR45B/MTMR3/GLUL/SIK2/SFRP1/HNRNPA1/GAS6/RRAGD/STK24/SESN1/MAP1LC3A/INHBB/WIPI2/PRKAG1/GBA/KLF10/FOXO3/GCN1/IFI16/LAMP2/ATG7/MAX/EIF2AK4/SESN2/RRAGB/SLC38A2/BCL2/PCK1/PDK4/COMT/KPTN/SREBF2/NPRL2/WIPI1/SESN3/NUAK1/NPRL3/IMPACT/ZFYVE1/RRAGC/UPP1/MIOS/MTOR/SREBF1/BECN1/CDKN…
SC	GOBP_REGULATION_OF_VIRAL_PROCESS	154	0.441659	2.80473	0.00251889	0.00887008	LARP7/LGALS1/RAB7A/PPIH/SRPK2/P4HB/STAT1/VPS4A/GSN/BANF1/TNIP1/STAU1/HLA-DRB1/TOP2B/PPIA/INPP5K/TSG101/SNX3/DYNLT1/IFITM3/PABPC1/BST2/CD74/ATG5/TRIM28/MDFIC/IFITM2/MPHOSPH8/IFITM1/KPNA2/RSF1/STOM/CNOT7/NECTIN2/LARP1/ISG15/APOBEC3C/SRPK1/ATG12/DHX9/HEXIM1/IFI16/ILF3/LY6E/PLSCR1/KPNA6/BCL2/AXL/CD4/TRIM32/PPIE/SNF8/N4BP1/ZC3HAV1/MID2/IFIT1/TRIM26/RAD23A/VAPB/TRIM21/TRIM27/CXCR4/IFIT5/NOTCH1/PPID/PKN…
SC	GOBP_POSITIVE_REGULATION_OF_NF_KAPPAB_TRANSCRIPTION_FACTOR_ACTIVITY	153	0.318906	2.01745	0.00253807	0.00887008	CIB1/CD36/UBE2V1/CAV1/MTPN/FLOT1/CLU/TERF2IP/DDRGK1/RBCK1/MTDH/LAMTOR5/PPIA/NPM1/FLOT2/CAT/RPS3/AR/TRADD/PRDX3/UBE2N/CARD16/HSPA1A/PYCARD/RNF25/RAB7B/MAP3K7/PSMA6/DHX9/RELA/CLOCK/IRAK1/APP/TRIM32/ZBTB7A/MID2/RIPK1/RIPK2/TRIM21/TRIM27/IKBKG/MYD88/STAT3/S100A9/TICAM1/TLR4/AGT/LGALS9/PRKD1/ARHGEF2/TFRC/TRIM37/ROR1/S100A8/HSPA1B/TRIM13/RNF31/CD40/RIPK3/TRAF2/CAPN3/AGER/NOD1/PRKD2
SC	GOBP_SMOOTH_MUSCLE_CELL_PROLIFERATION	153	0.4567	2.88916	0.00253807	0.00887008	XRCC6/XRCC5/PHB/POLDIP2/RHOA/MFN2/SF1/STAT1/GNA12/EFEMP2/ANG/APOD/NPR1/AIF1/IGF1/CTNNBIP1/TGFBR2/MMP2/IGFBP3/MNAT1/PTEN/ADIPOQ/PDGFRB/IGFBP5/GNAI2/GPER1/PPARG/NPR3/CYBA/THBS1/PRKDC/PDGFD/RBPMS2/TCF7L2/NPY5R/APOE/GNA13/IRAK1/S1PR1/ID2/BMP4/PDCD4/AKT1/MEF2C/TRIB1/NDRG2/OGN/CDKN1B/ZNF143/MYD88/CTNNB1/BMP2/PIK3CA/CDKN1A/EDN1/JUN/HPGD/TLR4/MAP3K5/HMOX1/MEF2D/NOTCH3/AGT/TPM1/GJA1/MYC/MMP9/MIR223/PDGFB/…
SC	GOBP_VACUOLAR_TRANSPORT	153	0.47082	2.97849	0.00253807	0.00887008	VCP/CHMP3/NDFIP1/VTI1B/CHMP2A/PINK1/HSPA8/RAB7A/SNAPIN/CLU/PSAP/AP3S1/VPS35/VPS4A/NCOA4/VPS25/VPS51/UBXN6/TSG101/CHMP2B/TMEM50A/VPS16/BIN1/M6PR/RILP/WASH3P/VPS39/GRN/CHMP1A/ARL8B/CHMP6/SORT1/AP3D1/HSPA1A/VPS37A/VAMP7/HMGXB4/VPS28/CCDC91/RAB7B/VIPAS39/LRP1/CHMP5/ADRB2/CHMP4A/LAPTM5/LAMP2/CHMP7/AP3B1/VTA1/CHMP4B/LAMP1/HOOK2/MVB12A/TRAK1/RHOB/VPS52/LEPROT/ATP6V0D1/STX8/SNF8/SCYL2/SMURF1/STAM/HGS/TME…
SC	GOBP_POSITIVE_REGULATION_OF_INTRACELLULAR_PROTEIN_TRANSPORT	153	0.505469	3.19768	0.00253807	0.00887008	UBE2L3/CIB1/PDCD5/ITGB1BP1/HSP90AB1/BCAP31/ANP32B/MFF/CD81/SH3GLB1/PINK1/UBE2D3/FIS1/RAN/HTRA2/FYN/OAZ1/YWHAE/MYO1C/LEP/SAE1/PDCD10/UBE2J2/SAR1A/UBL5/HRAS/TRIM28/TOMM7/SMAD3/GAS6/HUWE1/HDAC3/EDEM2/STOM/BAG3/MAPK14/ZFAND1/CAMK1/TM9SF4/CDK5/RBM22/DMAP1/BAP1/TMEM30A/HYAL2/ABLIM3/PPM1A/EMD/FLNA/TARDBP/ERGIC3/TPR/NMT1/TCF7L2/HCLS1/ZDHHC2/FZD5/FBXW7/LEPROT/RHOU/SREBF2/PIK3R1/JUP/TCAF1/ITGB2/PRNP/USP36/…
SC	GOBP_NUCLEAR_EXPORT	153	0.50748	3.21041	0.00253807	0.00887008	AHCYL1/ANP32B/EIF6/NCBP2/THOC7/RAN/NEMF/YWHAE/SSB/IWS1/SDAD1/PARK7/CSE1L/SRSF3/TXN/NPM1/NUTF2/RBM15B/SARNP/XPO6/IFI27/RPS15/ALKBH5/DDX19B/NXT1/YTHDC1/PABPN1/POLDIP3/STRADB/KHDRBS1/UPF2/DDX39B/HNRNPA1/GAS6/CHTOP/LZTS2/LTV1/RAE1/AGFG1/NUP214/BAG3/DDX39A/ZC3H11A/CAMK1/CDK5/SMG7/RBM22/PTPN11/ENY2/SMG5/RITA1/CALR/DHX9/PPM1A/EMD/THOC2/GLE1/TPR/TCF7L2/LSG1/HNRNPA2B1/PCID2/UPF1/THOC1/NUP153/XPO7/CHP1/SMU…
SC	GOBP_REGULATION_OF_RNA_SPLICING	153	0.56864	3.59731	0.00253807	0.00887008	TMBIM6/PRDX6/LARP7/AHNAK/HSPA8/SAP18/FAM50A/SNW1/CIRBP/SRPK2/PQBP1/RBFOX2/THRAP3/DDX5/SF1/CELF2/SRSF3/RBM42/HNRNPK/PUF60/SRSF7/SRSF2/RBM15B/DDX17/C1QBP/SRSF9/CELF1/NCL/YTHDC1/WTAP/FASTK/KHDRBS1/RPS13/FXR1/CWC22/RBM25/SRSF10/SON/HSPA1A/RBM4/HNRNPA1/CCNL2/HNRNPF/HNRNPLL/REST/PTBP1/HABP4/MBNL1/RBM3/RBM39/RBM22/SRSF1/SRSF6/RBM10/SNRNP70/SETX/RBM12/SRPK1/MAGOH/HNRNPH2/RBM8A/AKAP17A/RPS26/KHDRBS3/HNRNP…
SC	GOBP_RESPONSE_TO_TOPOLOGICALLY_INCORRECT_PROTEIN	153	0.579453	3.66572	0.00253807	0.00887008	TMBIM6/VCP/SERP1/HSP90AB1/WFS1/HSP90AA1/OS9/HSPA8/DNAJB12/OPTN/BOK/HSPD1/HSPB2/MFN2/HSPA5/ATF4/CREB3/CLU/DDIT3/ERP44/RNF185/DDRGK1/RHBDD2/DNAJB1/XBP1/HSPB1/AUP1/EIF2S1/RACK1/NFE2L2/DAXX/CCND1/RNF5/TRAM1/STUB1/UBXN4/UBE2J2/DERL1/ERLEC1/DNAJA1/DERL2/HERPUD1/HSPB7/BAG6/HSPA1A/SDF2L1/MBTPS1/MANF/HSPE1/HSPA4/EDEM2/UFL1/BAG3/DNAJC4/BFAR/RNF126/SERPINH1/DNAJB9/CDK5RAP3/DNAJC3/FAF2/THBS4/HSPA14/TMEM129/A…
SC	GOBP_CELL_CYCLE_CHECKPOINT_SIGNALING	162	0.251841	1.62005	0.00255102	0.00887008	TRIAP1/PSMG2/VPS4A/RPA2/CCND1/LCMT1/BABAM1/TIPRL/TREX1/WAC/ZNF830/DDX39B/CCNG1/IK/NBN/XPC/SYF2/MAPK14/PTPN11/CDK5RAP3/FOXN3/RPL26/CLOCK/PRKDC/EIF2AK4/TPR/PLK2/TAOK3/BUB3/NABP2/MAD2L2/CCNB1/PCID2/CDK5RAP2/THOC1/DUSP1/TRIM39/SETMAR/BRCC3/FEM1B/ZFYVE19/CDKN1B/ZW10/MAD2L1BP/CDC5L/CEP63/KLHL22/FBXO31/ATRIP/CDKN1A/ATF2/ANAPC15/NAE1/CRY1/PPP1R10/MAD1L1/MUS81/CCAR2/RPS27L/TP53BP1/ZNF207/DYNC1LI1
SC	GOBP_PROTEIN_MODIFICATION_BY_SMALL_PROTEIN_REMOVAL	162	0.388572	2.49961	0.00255102	0.00887008	VCP/SF3B5/HINT1/UCHL3/UBXN1/PSMD14/UCHL1/USP9X/TNIP1/PARK7/EIF3F/COPS3/TAF9/GPS1/USP16/BABAM1/DESI2/JOSD2/TAF7/TAF12/COPS4/OTUD5/UCHL5/USP47/COPS6/COPS8/SART3/COPS7A/USP22/WDR48/USP1/USP48/BAP1/USP7/STAMBP/USP11/TAF10/ENY2/SGF29/SHMT2/KAT2A/USP24/USP5/USP18/SUPT7L/TANK/USP39/USP14/OTUD1/COPS2/USP36/BRCC3/TRIM21/USP30/USP40/USP10/ZRANB1/TADA1/ASXL1/USP34/USPL1/USP32/USP53/TNFAIP3/TAF6L/TOR1A/ATXN7…
SC	GOBP_IMPORT_INTO_NUCLEUS	162	0.442271	2.84505	0.00255102	0.00887008	CD36/HSP90AB1/PHB2/PTTG1IP/SQSTM1/RANBP2/RAN/RANGRF/SUMO1/LEP/CRY2/SEC13/APOD/HTATIP2/CSE1L/HIKESHI/LMNA/PKIG/NUTF2/KPNB1/TNPO3/NXT1/TRIM28/MDFIC/TXNIP/KPNA3/SMAD3/HNRNPA1/KPNA2/HDAC3/NUP214/BAG3/MAPK14/RBM22/PRKAG1/DMAP1/IPO13/HYAL2/FLNA/TARDBP/TPR/KPNA6/HCLS1/NFKBIA/PPP3CA/PIK3R1/JUP/BMP4/ANGPT1/AKT1/NUP54/NUP153/UFM1/NOLC1/IPO5/IPO11/CHP1/NXT2/RPL23/NUP85/NOTCH1/STAT3/KPNA1/TNPO2/CDKN1A/RANBP6…
SC	GOBP_RIBOSE_PHOSPHATE_BIOSYNTHETIC_PROCESS	162	0.454952	2.92663	0.00255102	0.00887008	VCP/DGUOK/NME4/STOML2/ACSS2/ATIC/PINK1/ENO1/IMPDH2/PDHA1/ALDOA/NME2/AK2/PYGL/ACSL1/NME3/PPT1/PPCS/NUDT2/SLC25A1/TKT/MPC2/ELOVL1/NPR1/PDK2/APRT/NME1/TMSB4X/ELOVL5/AK3/HPRT1/PID1/DLD/COASY/UCK1/ACLY/PARP1/TECR/ATP6V0C/ACSL3/ACAT1/MT-ATP6/CMPK1/ADK/H19/PAPSS2/AK1/IMPDH1/AK4/ADA/MT-CO2/UCKL1/DNAJC30/SLC35B3/UQCC3/PAPSS1/GCDH/PRPS1/PRPS2/PDK4/PPCDC/SLC25A13/ACSL5/NPR2/PPT2/SLC35B2/MT-ATP8/ELOVL3/ACSL4…
SC	GOBP_REGULATION_OF_RESPONSE_TO_CYTOKINE_STIMULUS	162	0.455943	2.933	0.00255102	0.00887008	HSP90AB1/PXDN/CAV1/YTHDF2/GSTP1/RABGEF1/NR1H3/RNF185/MUL1/NOL3/CPNE1/SIGIRR/CCDC3/AGPAT2/TAF9/CASP1/GPS2/AGPAT1/CD74/SHARPIN/TREX1/UBE2K/MAP2K5/CARD16/TRIM44/HSPA1A/CASP4/PYCARD/SLIT3/GAS6/CDC37/ADIPOQ/ECM1/LSM14A/CNOT7/RNF113A/FADD/PTPN11/PPARG/ISG15/TNFRSF1A/DHX9/LAPTM5/NR1H2/PAFAH1B1/PPP2CB/AXL/IL1R1/USP18/PIAS4/IRAK1/SH2B3/TRIM32/ANGPT1/IRF7/VRK2/RIPK1/CSF1/RIPK2/PTPN6/HIPK1/CXCR4/TREM2/PTPN1…
SC	GOBP_REGULATION_OF_UBIQUITIN_DEPENDENT_PROTEIN_CATABOLIC_PROCESS	162	0.522746	3.36273	0.00255102	0.00887008	VCP/HSP90AB1/BCAP31/CAV1/GABARAP/UBXN1/RBX1/MAGEF1/EIF3H/CLU/SUMO1/GNA12/DDRGK1/PARK7/RACK1/PSMD10/CAMLG/ARAF/NFE2L2/TAF9/STUB1/ZFAND2A/HSPBP1/HERPUD1/DAB2/KEAP1/HECTD1/RPS7/RPL11/UCHL5/WAC/COMMD1/UBE2K/CEBPA/RNF139/SDCBP/BAG6/RPL5/HSPA1A/CSNK1A1/PTEN/MKRN2/UBQLN2/PIAS1/PDCL3/UFL1/SUMO2/CCDC22/HIPK2/GBA/USP7/UBQLN1/CDK5RAP3/TRIB2/LAPTM5/GIPC1/BBS7/OGT/USP5/UBE3A/BAG5/RAD23B/SMARCC1/ZER1/DNAJB2/FB…
SC	GOBP_REGULATION_OF_PRODUCTION_OF_MOLECULAR_MEDIATOR_OF_IMMUNE_RESPONSE	163	0.282245	1.82025	0.00257069	0.00887008	TMBIM6/VAMP3/DDX1/NDFIP1/CD36/PHB2/PHB/CD81/CUEDC2/MIF/RBP4/XBP1/HLA-E/B2M/PARP3/HLA-A/BST2/CD74/ATG5/TREX1/BCL6/HMCES/DNAJB9/MAP3K7/HK1/KMT5B/LAPTM5/HLA-F/SPON2/TNFSF13/TNFRSF14/MLH1/IL1R1/FZD5/MAD2L2/GPRC5B/ANGPT1/THOC1/DDX21/TNFRSF4/GPI/STX4/TNFRSF1B/STAT6/ARID5A/TICAM1/CD86/SIRT1/TLR4/HMOX1/SASH3/PTPRC/EXOSC3/DENND1B/TFRC/CD55/LACC1/TP53BP1/CD40
SC	GOBP_NEGATIVE_REGULATION_OF_MITOTIC_CELL_CYCLE_PHASE_TRANSITION	163	0.347317	2.23991	0.00257069	0.00887008	FHL1/TRIAP1/PSMG2/CDKN2B/CDK2AP2/PRMT2/VPS4A/RPA2/CCND1/LCMT1/BABAM1/FBXO7/CTDSP1/CTDSP2/TREX1/WAC/USP47/RAD21/ZNF830/CCNG1/CTDSPL/PTEN/IK/NBN/SYF2/ZFP36L1/ZFP36L2/JADE1/PINX1/AVEN/CDK5RAP3/FOXN3/RPL26/GPNMB/PRKDC/TPR/BCL2/MIIP/PLK2/TAOK3/PKD2/BUB3/RGCC/NABP2/MAD2L2/CCNB1/PCID2/CDK5RAP2/DUSP1/TRIM39/BRCC3/ZFYVE19/CDKN1B/ZW10/FAM107A/MAD2L1BP/RB1/NACC2/KLHL22/KLF4/FBXO31/CDKN1A/ANAPC15/NAE1/TPRA1/…
SC	GOBP_MEIOSIS_I_CELL_CYCLE_PROCESS	128	-0.307132	-1.65153	0.00257732	0.00887008	ATM/MEIOC/FANCD2/MEI1/BRIP1/PIWIL2/BRCA2/SLX4/RAD51D/DMC1/MAEL/FBXO5/ESPL1/BRDT/NDC80/SYCP3/TEX11/C1orf146/MSH5/SGO1/RAD51/DMRT1/SGO2/TERB1/PRDM7/TERB2/AURKA/TRIP13/MOV10L1/PLK1/PRDM9/RAD54L/BTBD18/TDRD9/FMN2/P3H4/TEX15/MSH6/DMRTC2/C11orf80/STAG3/RNF212/ERCC4/TERF1/SYCP1/CCNB1IP1/CDC25A/BCL2L11/TEX19/SYCE2/DNMT3L/WEE2/RMI1/CENPC/DDX4/RAD51B/SLC25A31/AGO4/MAJIN/TRIM75P/RAD51C/USP17L2/PSMA8/RNF212B…
SC	GOBP_RESPONSE_TO_BMP	166	0.286039	1.85314	0.00258398	0.00887008	RBPJ/HTRA1/FSTL1/UBE2D3/GPC3/PELO/ILK/DDX5/USP9X/FBXL15/FSTL3/ADAMTS12/TGFBR3/CHRDL1/FBN1/SMAD3/SFRP1/TRIM33/SFRP4/ENG/FST/NBL1/ABL1/UBE2D1/HTRA3/PPARG/HIPK2/CDH5/EXT1/PPM1A/BAMBI/SFRP2/RBPMS2/TOB1/BMP4/PDCD4/CRIM1/FKBP8/SMURF1/ACVRL1/LEMD2/BMP6/ETV2/HES1/NOTCH1/KDR/NUMA1/ZNF423/TNFAIP6/TMEM100/BMP2/ATF2/MSX1/ACVR2A/SKI/SMAD5/RGMB/ACVR1/SMAD1/SULF1/NOTCH2/EGR1/HEYL/BMPR2
SC	GOBP_BIOMINERALIZATION	166	0.311245	2.01644	0.00258398	0.00887008	ITGB1BP1/ATRAID/GPC3/ATF4/DDR2/FBXL15/LEP/COL1A2/TXLNG/IGF1/ATP2B1/SMAD3/MGP/GAS6/SLC24A3/TWIST1/SBDS/ECM1/FAM20C/STIM1/OSR2/LOX/SLC4A2/ISG15/ADRB2/SNX10/KLF10/TFIP11/ATG4B/ROCK1/PKDCC/CEBPB/CLEC3B/S1PR1/COL1A1/SRGN/BMP4/MEF2C/ROCK2/GPM6B/MINPP1/TCIRG1/CEMP1/BMP6/ALPL/CCL3/OMD/SPP1/HEY1/NOTCH1/ASPN/BMP2/WNT11/PTH1R/ACVR2A/FGR/LTBP3/ANO6/ACVR1/CCR1/GJA1/SLC20A1/FAM20A/LGR4/BMPR2
SC	GOBP_ORGAN_GROWTH	166	0.315503	2.04403	0.00258398	0.00887008	SERP1/SOD1/RBPJ/YY1/MESP1/PSAP/DDR2/TOMM70/RBP4/LEP/IGF1/AR/TGFBR2/TGFBR3/DUSP6/ANXA6/PTEN/LATS2/CITED2/PDGFRB/ECM1/POR/TSKU/SAV1/MAPK14/IER3IP1/PRKAR1A/PTPN11/YBX3/EXT1/LY6E/UBE3A/YAP1/BCL2/HEG1/TGFBR1/PARP2/S1PR1/SPRY2/AKT1/MEF2C/PIM1/PI16/RGS2/NOTCH1/IGF2/THBS3/BASP1/ATF2/EDN1/ACACB/FGF7/AGT/SASH3/SMAD1/HLX/RARA/WWC2/G6PD/FGF10/FGF2/AKAP13
SC	GOBP_POSITIVE_REGULATION_OF_VASCULATURE_DEVELOPMENT	166	0.389065	2.5206	0.00258398	0.00887008	ITGB1/VEGFB/XBP1/HSPB1/MYDGF/BTG1/MTDH/JAK1/NFE2L2/JMJD8/SASH1/TGFBR2/ANGPTL4/GRN/ADM/HSPB6/C3/RAMP2/AQP1/TWIST1/MDK/NINJ1/RRAS/ENG/ECM1/PDCL3/ABL1/PKM/C3AR1/PDCD6/STIM1/TJP1/NRP1/HIPK2/CDH5/TNFSF12/WARS2/CTSH/CD34/THBS1/AGGF1/SFRP2/SP1/FGF1/ADAM12/CMA1/APLNR/RHOB/VEGFD/ITGA5/JUP/ERAP1/HIPK1/SMOC2/CXCR4/ACVRL1/RAPGEF3/CYP1B1/DDAH1/TEK/KDR/STAT3/KLF4/CYBB/SIRT1/HMOX1/VEGFC/SMAD1/PRKD1/SIRT6/FGF2/C…
SC	GOBP_POSITIVE_REGULATION_OF_BINDING	166	0.499748	3.23768	0.00258398	0.00887008	CEBPG/ANXA2/EDF1/HSP90AB1/HMGB1/CAV1/POLDIP2/FLOT1/CALM1/EIF3D/RAN/DDRGK1/PARK7/EIF2S1/CALM2/RALB/NME1/MAPRE1/TXN/LAMTOR5/S100A10/B2M/FKBP1A/DERL1/LARP6/PPP2CA/IGF1/SPON1/DPH3/ADD1/TRIM28/RPL11/EIF4G1/CALM3/PARP1/MBD2/TWIST1/CLDN5/ABL1/GMNN/CDK5/PINX1/LRP1/EIF3C/NRP1/PPARG/CDK9/HIPK2/CTHRC1/KDM1A/DHX9/BAMBI/GTF2B/HMGB2/RFNG/PLXND1/HSF1/MFNG/PPP2CB/TCF7L2/APOE/APP/PIN1/BMP4/ACD/RIPK2/PLCL2/TRIM21/…
SC	GOBP_CELLULAR_RESPONSE_TO_XENOBIOTIC_STIMULUS	167	0.259124	1.68219	0.0025974	0.00887008	GLYAT/GSTP1/CBR1/VKORC1/HSPA5/AIP/ACSL1/UCHL1/AKR1C1/GUK1/ACAA1/NQO1/PCNA/NFE2L2/CYB5B/GSTO1/GSTA4/CBR3/MCM7/FMO2/GSTM4/EPHX1/GAS6/ADIPOQ/POR/REST/RBM22/AOX1/SULT1A4/CRHBP/PPP1R12A/CRYZ/GSTM3/SULT1A2/HSF1/GSTM2/FBP1/CRKL/FMO1/MEF2C/AADAC/PRNP/CXCR4/CYP1B1/RNF149/RAP2A/RB1/BPHL/CYP2R1/EDN1/PDE4A/CYP26B1/MYC/CYP2U1/TFRC/FMO4/GSTM1/SULT1A1/CD69/AOC2/NCEH1
SC	GOBP_NEGATIVE_REGULATION_OF_MAPK_CASCADE	167	0.402286	2.61158	0.0025974	0.00887008	ITGB1BP1/PHB/CAV1/EIF3A/PINK1/GSTP1/PEBP1/TIMP3/IGBP1/UCHL1/PPP2R1A/TNIP1/FOXO1/PSMD10/STK38/SMPD1/PPIA/AIDA/INPP5K/DNAJA1/GPS2/DAB2/DUSP6/SLC9A3R1/SFRP1/PTEN/ZMYND11/HDAC3/ADIPOQ/ABL1/GPER1/EFNA1/SIRPA/PPARG/GBA/CDK5RAP3/HYAL2/RANBP9/SPRY1/SFRP2/FBLN1/PAFAH1B1/EZR/TAOK3/APOE/KLHL31/SH2B3/LMO3/PIN1/BMP4/PDCD4/SPRY2/GBP1/DUSP1/PER1/PTPN6/NDRG2/DUSP4/LEMD2/RNF149/EMILIN1/RGS2/HIPK3/ERRFI1/TREM2/PTP…
SC	GOBP_REGULATION_OF_CELL_CYCLE_G1_S_PHASE_TRANSITION	167	0.439841	2.85538	0.0025974	0.00887008	APEX1/PHB2/ATP2B4/RDX/FHL1/UBE2E2/PSME1/PAF1/TRIAP1/CDKN2B/CDK2AP2/PRMT2/CDKN2C/DDRGK1/ANXA1/CPSF3/ANKRD17/PSME2/RPA2/CCND1/LSM10/KMT2E/FBXO7/AIF1/PPP2CA/MEPCE/PLRG1/CTDSP1/CTDSP2/TREX1/METTL13/CCND2/WAC/EIF4G1/MNAT1/CCND3/CTDSPL/PTEN/TFDP1/EGFR/JADE1/PSME3/TMEM14B/RPL26/CUL4B/GPNMB/PRKDC/CCNH/BCL2/CDKN2D/PLK2/PKD2/PAGR1/RGCC/FBXW7/ID2/AKT1/RRM1/TRIM39/PTPN6/CDKN1B/FAM107A/RB1/NACC2/APBB1/MLF1/KL…
SC	GOBP_NOTCH_SIGNALING_PATHWAY	174	0.337588	2.21579	0.00260417	0.00887008	ITGB1BP1/RBPJ/YTHDF2/MESP1/CFD/TIMP4/PDCD10/SLC35C1/POSTN/TGFBR2/DTX1/CEBPA/TSPAN15/PERP/BCL6/NCSTN/APH1B/PSENEN/EGFL7/PSEN2/ZMIZ1/RITA1/GOT1/SIX1/RFNG/MFNG/YAP1/NFKBIA/GMDS/IL6ST/SEL1L/MAML2/FBXW7/TRAF7/APP/SREBF2/DTX4/PGAM2/ZBTB7A/AKT1/MAML1/SPEN/WWP2/ARRDC1/NEPRO/CDKN1B/HEY1/ETV2/HES1/APH1A/NOTCH1/ZNF423/TMEM100/BMP2/STAT3/BLOC1S2/PTP4A3/NEURL1B/NOTCH3/SNAI2/CDK3/MIB2/CCNC/NOTCH2/FGF10/HEYL/JA…
SC	GOBP_INSULIN_SECRETION	173	0.259316	1.70085	0.00261097	0.00887008	SERP1/JAGN1/NDUFAF2/PPP3CB/GLUD1/ADRA2A/SRI/RBP4/ANXA1/MPC2/LEP/HMGN3/PARK7/BAD/HLA-DRB1/UQCC2/CDK16/UCP2/GLUL/NNAT/ICA1/SFRP1/PIM3/SOX4/REST/GPER1/HADH/RAB11FIP2/INHBB/OXCT1/PTPN11/CLOCK/RAB11B/TCF7L2/PPP3CA/PFKL/SNX19/PCK2/ACVR1C/LRP5/OSBP/KLF7/ACSL4/TCIRG1/FKBP1B/EFNA5/STX4/SREBF1/IRS2/NR1D1/LRRC8A/IL1RN/RAB11FIP5/ADCY5/SLC16A1/PTPRN2/SLC9B2/SIDT2/JAK2/PCLO
SC	GOBP_CARDIAC_CHAMBER_DEVELOPMENT	164	0.267401	1.72733	0.00261097	0.00887008	RBPJ/DHRS3/SNX17/MESP1/CRELD1/RBP4/PARVA/FKBP1A/HECTD1/TGFBR2/TGFBR3/SLIT3/CPE/CITED2/ENG/SOX4/SAV1/LMO4/NRP1/LUZP1/LY6E/PDE2A/SOS1/SEMA3C/SFRP2/AP2B1/PLXND1/HEG1/TGFBR1/APLNR/NPY5R/BMP4/MAML1/EDNRA/MEF2C/MKS1/NPRL3/CNTRL/SMARCD3/HEY1/HES1/TEK/NOTCH1/BMP2/WNT11/GJA5/NRP2/SLIT2/FGFRL1/TPM1/ACVR1/SRF/NOTCH2/ANK2/HEYL/BMPR2/JAG1
SC	GOBP_POSITIVE_REGULATION_OF_RESPONSE_TO_BIOTIC_STIMULUS	173	0.286002	1.87588	0.00261097	0.00887008	XRCC6/AKIRIN2/XRCC5/HMGB1/HSP90AA1/HSPD1/PUM1/FYN/PQBP1/RNF185/MIF/TOMM70/ANKRD17/HLA-DRB1/HLA-E/RPS19/SASH1/GRN/UBE2K/NONO/PYCARD/NMI/LSM14A/FADD/NECTIN2/SFPQ/PSPC1/MAP3K7/CYBA/TYROBP/DHX9/HEXIM1/IFI16/HLA-F/IFI35/PRKDC/HMGB2/PLSCR1/RBM14/LY96/STAT5B/LAMP1/LY86/LBP/PAK1/IRF7/PUM2/ZCCHC3/POLR3F
SC	GOBP_POSITIVE_REGULATION_OF_DEVELOPMENTAL_GROWTH	165	0.293349	1.89131	0.00261097	0.00887008	SERP1/RBPJ/MAP1B/GOLGA4/MKKS/IST1/MUL1/LEP/EIF4G2/GPAM/RAB11A/CYFIP1/IGF1/PPIB/ITSN2/TGFBR2/PLAA/TGFBR3/TWF2/CXCL12/NIPBL/DBN1/NDEL1/MAPK14/BBS4/NRP1/YBX3/ADNP/GDI1/PAFAH1B1/FN1/STAT5B/YAP1/EZR/BCL2/DBNL/PARP2/CRABP2/AKT1/MEF2C/CSF1/PIM1/INSR/MACF1/SMURF1/CXCR4/EFNA5/NOTCH1/IGF2/BASP1/TRPV2/SHTN1/EDN1/ZFYVE27/NEDD4L/ACACB/MTM1/SASH3/SRF/HLX/FGF2/BMPR2/GHR
SC	GOBP_TISSUE_REMODELING	165	0.305612	1.97037	0.00261097	0.00887008	RBPJ/CAV1/RAB7A/DDR2/NOL3/LEP/CST3/TPP1/EPAS1/CTSK/ATG5/MMP2/MITF/SFRP1/TMBIM1/MDK/RSPO3/IGFBP5/CSF1R/TIMP1/PPARG/CTHRC1/ADRB2/THBS4/EXT1/SNX10/GPNMB/FLNA/SEMA3C/DEF8/SUCO/ROCK1/GPR137B/LIPA/AXL/PPP3CA/S1PR1/PDK4/LRP5/CSPG4/EDNRA/MEF2C/ROCK2/CAPN1/TMEM64/TCIRG1/ACVRL1/SPP1/CTNNB1/PTH1R/CSK/LTBP3/AGT/BCR/GJA1/NOTCH2/TFRC/SYK/FGF10/LGR4/TNFAIP3/ACP5/BMPR2/JAG1
SC	GOBP_STEROID_BIOSYNTHETIC_PROCESS	173	0.319868	2.09802	0.00261097	0.00887008	SOD1/AKR1C3/FDFT1/HINT2/HSD17B10/ACAA2/NSDHL/CYB5R1/CES1/SF1/TSPO/TM7SF2/ASAH1/LEP/CYB5R3/EBP/PMVK/HSD17B8/NFKB1/INSIG1/DAB2/ACOT8/HSD17B11/ADM/FDPS/ACLY/MBTPS1/DHCR7/POR/OSBPL1A/REST/SCP2/DHCR24/ACBD3/IGFBP7/FGF1/ERLIN1/IDI1/APOE/SCAP/FDX1/CYP27A1/LSS/OSBP/STARD3/OSBPL9/DHRS11/ARV1/HSD3B7/BMP6/ATP1A1/SRD5A3/BMP2/SREBF1/H6PD/CYP2R1/NR1D1/LBR/SIRT1/PLPP6/SNAI2/CYP21A2/EGR1/ERLIN2/G6PD/ABCD3/LPCAT3…
SC	GOBP_SIGNAL_TRANSDUCTION_IN_RESPONSE_TO_DNA_DAMAGE	165	0.336797	2.17143	0.00261097	0.00887008	PTTG1IP/TRIAP1/MIF/DDX5/COPS3/ATRX/PSMD10/RPA2/CCND1/BABAM1/SMYD2/ING4/CD44/CD74/TIPRL/NDRG1/TREX1/WAC/KAT5/GRB2/ZNF830/DDX39B/EEF1E1/CCNG1/NBN/TWIST1/XPC/SYF2/SOX4/MAPK14/ABL1/PTPN11/HIPK2/CDK5RAP3/FOXN3/KDM1A/RPL26/FOXO3/CLOCK/PRKDC/EIF2AK4/GADD45A/SESN2/PLK2/TAOK3/MAD2L2/THOC1/TRIM39/BRCC3/FEM1B/CDKN1B/CDC5L/CEP63/USP10/SPRED2/FBXO31/ATRIP/CDKN1A/ATF2/MSX1/SIRT1/BCL3/CRY1/BATF/PPP1R10/SNAI2/BID
SC	GOBP_NEGATIVE_REGULATION_OF_WNT_SIGNALING_PATHWAY	165	0.342589	2.20878	0.00261097	0.00887008	CAV1/GPC3/SDHAF2/FZD4/MESP1/RBX1/PFDN5/DDIT3/TLE1/CBY1/FOXO1/RACK1/TAX1BP3/CTNNBIP1/DAB2/OTUD5/IGFBP4/SLC9A3R1/SFRP1/CSNK1A1/HMGXB4/LZTS2/IGFBP6/MDK/LATS2/SFRP4/TSKU/MAPK14/TMEM88/JADE1/LRP1/SIAH2/CTHRC1/APCDD1/WWTR1/FOXO3/EMD/SFRP2/G3BP1/TCF7L2/WWOX/GSC/APOE/MAD2L2/CTNND1/SCYL2/SOX17/TMEM64/FRZB/MDFI/NOTCH1/TLE3/CTNNB1/BMP2/WNT11/RUVBL2/UBAC2/TLE2/BICC1/FZD6/NFATC1/TPBG/SNAI2
SC	GOBP_PATTERN_RECOGNITION_RECEPTOR_SIGNALING_PATHWAY	173	0.338192	2.2182	0.00261097	0.00887008	RTN4/CD36/HMGB1/PHB2/RFTN1/PHB/CAV1/FLOT1/HSPD1/PUM1/NR1H3/GPR108/TNIP1/ANKRD17/CD14/FLOT2/TNIP2/C1QBP/GPS2/RNF135/BIRC2/HSPA1A/NMI/NINJ1/LSM14A/RAB7B/MAPKAPK3/RAB11FIP2/MAP3K7/CYBA/UBQLN1/RELA/AP3B1/IFI35/LY96/PJA2/NFKBIA/ZDHHC5/IRAK1/LBP/NFKBIL1/GPATCH3/MAPKAPK2/WDFY1/IRF7/PUM2/ZCCHC3/RIPK2/UNC93B1/TSPAN6/PELI1/SLC15A3/MYD88/TREM2/TICAM1/NR1D1/IRF3/IFIH1/BIRC3/TLR4/APPL2/TICAM2/RIOK3/ERBIN/LGAL…
SC	GOBP_RECEPTOR_METABOLIC_PROCESS	164	0.34555	2.23215	0.00261097	0.00887008	VAMP3/ANXA2/CD36/ITGB1/CAV1/CD81/SH3GLB1/OPTN/FLOT1/AP2M1/ARF1/CD63/LAMTOR1/CAMLG/RAB5A/RAB31/CLTC/MYLIP/ADM/PICALM/GRB2/RAMP2/SDCBP/TBC1D16/UBQLN2/SFRP4/DTNBP1/CDK5/LRP1/CHMP5/MTMR2/LAPTM5/RAB11B/CD9/AHI1/LRPAP1/FURIN/RAMP3/EZR/ATAD1/MVB12A/ECE1/KIF16B/APOE/SCYL2/MKLN1/FCER1G/ANGPT1/PLEKHJ1/CAPN1/ITGB2/INSR/UVRAG/SMURF1/GRK3/PTPN1/FNTA/BECN1/EFNB2/FMR1/PIK3R4/SNX1/SNCA/TFRC/SYK/NSF/ARFGEF2/ACKR3…
SC	GOBP_NEGATIVE_REGULATION_OF_IMMUNE_RESPONSE	173	0.358789	2.3533	0.00261097	0.00887008	PSMA1/GPX1/NDFIP1/PSMB4/YTHDF2/RABGEF1/PPP3CB/CD59/SERPING1/FYN/COL3A1/NR1H3/MUL1/A2M/ANXA1/BANF1/HLA-DRB1/HLA-E/RPS19/PARP3/CRK/HLA-A/HLA-B/LYAR/TREX1/GRN/LGALS3/BCL6/VSIG4/NMI/MKRN2/CNOT7/MAPK14/PPARG/ISG15/FGL2/IFI16/HLA-F/NR1H2/TNFRSF14/FURIN/PLK2/NPY5R/USP18/DUSP22/GFER/THOC1/PTPN6/TRIM21/TRIM27/SLAMF8/TREM2/STAT6/RC3H1/HMOX1/FGR/ARG2/TRAFD1/BCR/PTPRC/LGALS9/NLRX1/CLEC4G/HLX/ZBTB7B/SYK/CD55/…
SC	GOBP_CARBOHYDRATE_DERIVATIVE_CATABOLIC_PROCESS	165	0.402335	2.59398	0.00261097	0.00887008	DUT/HINT1/GPD1/ITPA/DCTPP1/NEIL2/NT5C/FUCA2/GNS/ALDH1A1/CST3/NUDT8/GLB1/MGAT1/CD44/NTHL1/MBD4/FUCA1/HPRT1/ADAMTS12/GNPDA1/DERA/BPGM/HEXB/EDEM2/NAGA/LYVE1/ACAT1/CDADC1/FBXO17/GALT/GLA/NAGLU/APOBEC3C/GBA/UNG/TYMP/NUDT1/HYAL2/CTSL/AMDHD2/ADA/NUDT7/PDE2A/GPC1/NUDT18/PRTFDC1/ABHD10/HEXA/SMUG1/GM2A/CTBS/PDE8B/NT5E/ENPP4/ACOT7/NUDT3/GPD1L/MAN1A1/NUDT16/NEU1/UPP1/NAGK/EDEM3/STT3B/PDE4A/GNPDA2/GBA2/NPL/PD…
SC	GOBP_REGULATION_OF_MRNA_CATABOLIC_PROCESS	164	0.412201	2.66269	0.00261097	0.00887008	POLR2G/YBX1/APEX1/VIM/CSDE1/LSM1/YTHDF2/DCP1A/HNRNPD/PUM1/CIRBP/SERBP1/THRAP3/HNRNPM/HNRNPC/NBAS/YTHDF1/NPM1/PABPC1/HNRNPAB/RIDA/CELF1/ALKBH5/SYNCRIP/FASTK/FXR1/CNOT8/CASC3/EXOSC5/PAIP1/ZFP36L1/CNOT7/MAPK14/ZFP36L2/RBM10/LARP1/YBX3/MAGOH/DHX9/RBM8A/TARDBP/HNRNPU/FASTKD5/ROCK1/MLH1/NT5C3B/EXOSC7/EXOSC8/TOB1/PCID2/ZC3HAV1/UPF1/MAPKAPK2/AKT1/PCBP4/PUM2/HNRNPA0/ROCK2/BTG2/CNOT2/PAN3/MYD88/EXOSC9/DCP1…
SC	GOBP_SIGNAL_TRANSDUCTION_BY_P53_CLASS_MEDIATOR	164	0.437702	2.82742	0.00261097	0.00887008	HINT1/UBB/PTTG1IP/BOK/SNW1/TRIAP1/MIF/DDX5/TMEM109/COPS3/ATRX/PDK2/PSMD10/TAF9/PHLDA3/HNRNPK/PAK1IP1/NUPR1/SHISA5/SMYD2/ING4/CD44/RPS7/RPS15/CD74/NDRG1/RPL11/RRN3/KAT5/ING2/RNF34/BAG6/RPL5/PERP/PYCARD/EEF1E1/NBN/TWIST1/PRMT5/SETD9/SOX4/HIPK2/USP7/CDK5RAP3/DDIT4/KDM1A/TOPORS/RPL26/HEXIM1/RPS20/FOXO3/IFI16/TAF9B/RPF2/EIF5A/SESN2/WWOX/BCL2/PLK2/BOP1/AKT1/HIPK1/NUAK1/RPL23/CDKN1B/USP10/SPRED2/MTOR/ML…
SC	GOBP_AEROBIC_RESPIRATION	165	0.692235	4.46305	0.00261097	0.00887008	ACO1/VCP/NDUFAB1/COX4I1/UQCRH/GHITM/CHCHD2/COX6A1/DGUOK/NDUFA2/STOML2/NDUFB8/NDUFB7/NDUFS5/UQCRFS1/IDH3B/NDUFV2/COX5B/COX7A2L/PINK1/ISCU/NDUFS6/NDUFA8/COX5A/NDUFB9/NDUFV1/RHOA/ME3/SDHAF2/NDUFB4/PDHA1/NDUFA6/ACO2/NDUFB6/NDUFA10/NDUFC1/BLOC1S1/MDH2/UQCRC1/COX7A2/DNAJC15/SURF1/UQCR10/IDH3G/UQCRQ/PARK7/NDUFA12/NDUFB10/NDUFS2/NDUFA1/NDUFS4/MDH1/NDUFC2/SUCLG1/UQCC2/NDUFA4/CAT/FH/SDHB/NDUFS8/CYC1/NUPR1/…
SC	GOBP_POSITIVE_REGULATION_OF_PEPTIDYL_TYROSINE_PHOSPHORYLATION	186	0.246217	1.62328	0.0026178	0.00887008	CD36/HAX1/CD81/ADRA2A/FYN/MIF/LEP/ARL2BP/ENPP2/IGF1/CD44/CD74/UNC119/PECAM1/GAS6/ADIPOQ/MLST8/ABL1/CSF1R/EFNA1/NRP1/PTPN11/TNFRSF1A/THBS4/ABI1/ADNP/TNFRSF14/HSF1/HCLS1/BANK1/IL6ST/CD4/GPRC5B/FBXW7/ITGA5/ANGPT1/OSBP/EHD4/CSPG4/RIPK2/PRNP/BMP6/BTC/EFNA5/HES1/TREM2/PTPN1/IGF2/MTOR/FGF7/AGT/PTPRC/ACVR1/PIBF1/ARHGEF2/GFRA1/PDGFB/AREG/SYK/FGF10/GHR/CD40/JAK2/KITLG/TNFRSF18/NEDD9
SC	GOBP_NEGATIVE_REGULATION_OF_CELL_CELL_ADHESION	186	0.259422	1.71035	0.0026178	0.00887008	NDFIP1/HMGB1/RDX/YTHDF2/ASS1/PRDX2/ANXA1/HLA-DRB1/CD74/CXCL12/MAP2K5/FXYD5/LGALS3/BCL6/VSIG4/MDK/ADIPOQ/ABL1/PRKAR1A/WNK1/FGL2/LAPTM5/LRRC32/GPNMB/CD9/TNFRSF14/CEBPB/SWAP70/CTSG/RGCC/MAD2L2/SH2B3/DUSP22/BMP4/AKT1/TNFRSF21/C1QTNF1/PTPN6/PRNP/BMP6/PELI1/NOTCH1/TNFAIP8L2/BMP2/KLF4/ZNF703/CD86/RC3H1/GTPBP4/MYADM/PODXL/CASP3/ARG2/IL1RN/ADAMTS18/CBLB/SDC4/MAD1L1/LGALS9/CLEC4G/HLX/SOCS1/ZBTB7B/JAG1/DUSP…
SC	GOBP_MUSCLE_CELL_DEVELOPMENT	172	0.2704	1.76996	0.0026178	0.00887008	GPX1/ITGB1/YY1/FLII/UCHL1/TOMM70/EFEMP2/CAV2/CFL2/MYL9/LMNA/BIN1/WDR1/IGF1/ACTN1/ACTG1/SGCB/ATG5/ADM/RAMP2/ENG/PDGFRB/MYOF/PRKAR1A/LOX/ACTN4/LMOD1/KDM1A/HNRNPU/SIX1/SMYD3/TMOD1/TNNT3/BCL2/PPP3CA/PARP2/MEF2A/BMP4/BIN3/MAML1/EDNRA/CSRP1/CSRP2/PI16/PLEC/OBSL1/RGS2/HES1/NOTCH1/MTOR/AFG3L2/EDN1/SKI/NFATC2/AGT/TPM1/SRF/SGCD/PDGFRA/G6PD/ANK2/AKAP13
SC	GOBP_REGULATION_OF_MAP_KINASE_ACTIVITY	186	0.342411	2.25748	0.0026178	0.00887008	CAV1/FZD4/GSTP1/ADRA2A/UCHL1/MIF/PDCD10/STK38/SMPD1/AIDA/INPP5K/TSG101/RPS3/DNAJA1/SASH1/HRAS/FGFR1/MAP2K5/SFRP1/ADIPOQ/PDGFRB/EGFR/DTNBP1/PPARG/GBA/MAP3K7/CDK5RAP3/HYAL2/TRIB2/THBS1/SPRY1/SOS1/SFRP2/PDGFD/FGF1/TNXB/TAOK3/APOE/IRAK1/FZD5/SH2B3/PAK1/SNF8/BMP4/PDCD4/SPRY2/DUSP1/TRIB1/ERP29/INSR/PTPN6/PDGFC/RGS2/HGS/HIPK3/DVL3/PTPN1/BMP2/CCL19/CSK/EDN1/TLR4/MAP3K5/SPRY4/AGT/PTPRC/DUSP16/PDGFB/SYK/FG…
SC	GOBP_RESPONSE_TO_MONOSACCHARIDE	186	0.361264	2.38178	0.0026178	0.00887008	GPX1/JAGN1/NDUFAF2/SERPINF1/SLC29A1/RHOA/PPP3CB/LPL/ADRA2A/SRI/TXN2/PIH1D1/MPC2/LEP/XBP1/HMGN3/BAD/HLA-DRB1/RACK1/CDK16/GPAM/CAT/EIF2B1/UCP2/TGFBR2/EIF2B3/COL6A2/GLUL/ZBTB20/TXNIP/GAS6/PIM3/EIF2B5/ADIPOQ/SOX4/GPER1/RAB11FIP2/ZBED3/OXCT1/CYBA/FOXO3/THBS1/MLXIPL/RAB11B/TRA2B/SESN2/TCF7L2/ENDOG/PCK1/CMA1/PPP3CA/PFKL/PCK2/ACVR1C/LRP5/EIF2B2/OSBP/KLF7/EIF2B4/FKBP1B/CDKN1B/PRKACA/EFNA5/KHK/STX4/TREM2/V…
SC	GOBP_REGULATION_OF_LIPID_LOCALIZATION	172	0.36461	2.38664	0.0026178	0.00887008	SURF4/ANXA2/CD36/CAV1/DBI/FIS1/LPL/TRIAP1/ACSL1/NR1H3/MIF/CES1/TSPO/LAMTOR1/PRELID1/EEPD1/NAXE/LEP/CRY2/PNPLA2/NFKB1/PLIN2/PLTP/GPS2/DAB2/C3/CIDEA/HILPDA/OSBPL8/EHD1/ADIPOQ/POMC/PLIN3/SCP2/LRP1/PTPN11/PPARG/OXT/TMEM30A/THBS1/ITGAV/NR1H2/FURIN/NFKBIA/ABCA5/ABHD5/APOE/APOC1/ACSL5/SREBF2/RXRA/OSBPL11/AKT1/C1QTNF1/SCARB1/ARV1/BMP6/SPP1/TREM2/ABCA1/IRS2/EDN1/SIRT1/CRY1/ACACB/AGT/FABP3/ZDHHC8/SYK/AGTR1…
SC	GOBP_ENDOTHELIAL_CELL_PROLIFERATION	172	0.389703	2.55089	0.0026178	0.00887008	SPARC/ITGB1BP1/HMGB1/CAV1/VEGFB/STAT1/STAT5A/ANG/CAV2/LEP/MYDGF/PDCD10/TNMD/MMRN2/FGFR1/AIMP1/CXCL12/PTPRM/MDK/ECM1/PDCL3/PDCD6/NRP1/PPARG/ZNF580/EGFL7/TNFSF12/CYBA/NR2F2/LOXL2/THBS4/CD34/THBS1/AGGF1/HMGB2/SP1/TGFBR1/APLNR/RGCC/APOE/VEGFD/BMP4/ANGPT1/AKT1/MEF2C/SCARB1/ACVRL1/BMP6/TEK/THAP1/ATOH8/KDR/IGF2/BMP2/STAT3/JUN/NRP2/SIRT1/HMOX1/VEGFC/SULF1/CCL2/PRKD1/SIRT6/PDGFB/FGF2/BMPR2/AGTR1
SC	GOBP_DNA_BIOSYNTHETIC_PROCESS	186	0.394544	2.60119	0.0026178	0.00887008	VCP/CCT5/TCP1/XRCC5/HSP90AB1/PHB/HSP90AA1/RPA1/POLDIP2/CCT7/CCT8/CCT6A/CCT4/PTGES3/HNRNPD/POLE4/TERF2IP/HNRNPC/MEAF6/TK2/PCNA/NHP2/PARP3/NOP10/TEN1/ING4/POLE3/POLD2/TREX1/CCT3/HNRNPA1/TNKS1BP1/TFDP1/ADIPOQ/PDGFRB/JADE1/PINX1/DKC1/LOX/POLG/PARM1/REV1/SMG5/HNRNPU/CCT2/WRNIP1/POLD4/CDKN2D/CHTF8/RGCC/NABP2/REV3L/MAD2L2/HNRNPA2B1/SPRTN/GFER/GAR1/ACD/PNKP/RAD50/RCHY1/SMOC2/PRIMPOL/PARP4/ACVRL1/RFC1/TNK…
SC	GOBP_POSITIVE_REGULATION_OF_PEPTIDASE_ACTIVITY	186	0.438445	2.89063	0.0026178	0.00887008	VCP/AKIRIN2/PDCD5/HMGB1/BEX3/NDUFA13/BCAP31/ANP32B/CAV1/PCOLCE2/PINK1/PSME1/BOK/RHOA/ARL6IP5/MTCH1/DAP/HSPD1/FIS1/PSMD14/IFT57/HTRA2/FYN/MUL1/DDRGK1/GSN/PRELID1/ASPH/BAD/FAM162A/ADRM1/RACK1/PSME2/RPS3/PDCD2/CASP1/GRN/PICALM/PCOLCE/PERP/SMAD3/CASP4/PYCARD/HSPE1/CTSD/NCSTN/DLC1/REST/PDCD6/GPER1/EFNA1/PSME3/APH1B/FADD/RCN3/PSENEN/PPARG/CIDEB/CTSH/LAPTM5/IFI16/TNFSF10/SFRP2/HSF1/FBLN1/FN1/APP/ACVR1C/…
SC	GOBP_POSITIVE_REGULATION_OF_I_KAPPAB_KINASE_NF_KAPPAB_SIGNALING	186	0.483231	3.1859	0.0026178	0.00887008	DDX1/NDFIP1/CD36/UBE2V1/PINK1/LGALS1/RHOA/TFG/EEF1D/FYN/MUL1/TERF2IP/VAPA/S100A13/GOLT1B/RHOC/RBCK1/ANKRD17/HLA-DRB1/MTDH/NEK6/LAMTOR5/TNIP2/TMEM9B/LITAF/GAPDH/FKBP1A/S100B/SHISA5/JMJD8/CASP1/LURAP1L/BST2/TRADD/CD74/SHARPIN/UBE2N/BIRC2/CARD16/WLS/APOL3/CXXC5/TMEM101/ADIPOQ/ECM1/S100A4/ABL1/CCDC22/FADD/MAP3K7/TNFRSF1A/UBE2I/MIER1/RELA/PPM1A/LPAR1/FLNA/TNFSF10/MAP3K3/PLK2/CD4/ATP2C1/IRAK1/GPRC5B/SL…
SC	GOBP_REGULATION_OF_CELL_DIVISION	185	0.24135	1.59312	0.00262467	0.00887008	CETN2/CIB1/ITGB1BP1/YBX1/SH3GLB1/POLDIP2/RHOA/CALM1/CDK2AP2/VEGFB/PRPF40A/VPS4A/RACK1/CALM2/CAT/RAB11A/CALM3/TXNIP/MDK/PKP4/BBS4/WDR5/THBS4/BCL2L1/KAT14/GIPC1/KIF3B/SGF29/SFRP2/KAT2A/PDGFD/FGF1/PLK2/MBIP/VEGFD/PIN1/MAP9/CUL3/KLHL9/SOX17/SVIL/UVRAG/ZFYVE19/BIRC6/PDGFC/BTC/EVI2B/IGF2/GIT1/BECN1/PKN2/SMYD5/PIK3R4/RBL2/CDC42/FGF7/CSPP1/SETD2/VEGFC/MYC/CDC25B/PDGFB/ANKRD53/AHCTF1/FGF2/HTR2B/KIF13A/PPBP
SC	GOBP_CELL_KILLING	183	0.263482	1.73993	0.00262467	0.00887008	CEBPG/KIF5B/HSP90AB1/PRDX1/TUSC2/TUBB/PPP3CB/CD59/HMGN2/TUBB4B/HLA-DRA/LEP/HLA-DRB1/HLA-E/RPS19/B2M/CRK/HLA-A/HLA-B/GAPDH/ROMO1/CFH/HPRT1/PLEKHM2/ARL8B/C3/VAMP7/FADD/NECTIN2/CCL13/TYROBP/CTSH/BCL2L1/HLA-F/STAT5B/LAMP1/RPL30/AZGP1/CTSG/NKG7/CORO1A/GFER/PTPN6/STX7/DNASE1L3/MYD88/FCGR3A/VAMP2/DEFB132/PTPRC/CD1C/LGALS9/GZMB/LYST/RNF19B/SYK/CD55/ICAM1/MICA/RIPK3/ITGAM/ELANE/GNLY/AGER/FCGR2B/FCGR1A/IGH…
SC	GOBP_REGULATION_OF_B_CELL_ACTIVATION	183	0.31535	2.08244	0.00262467	0.00887008	SH3KBP1/NDFIP1/CD81/PPP2R3C/MIF/XBP1/BAD/PARP3/TNIP2/CD74/SFRP1/BCL6/HMCES/ZFP36L1/ZFP36L2/TYROBP/KMT5B/TRDC/LAPTM5/ADA/THEMIS2/TNFSF13/STAT5B/CD320/MLH1/BCL2/TNFSF13B/TRBC2/BANK1/TRBC1/SLC39A10/MAD2L2/ID2/GPR183/PCID2/THOC1/TNFRSF4/MEF2C/TNFRSF21/PTPN6/BST1/IGKC/PELI1/SLAMF8/IGLC3/IGLC2/STAT6/MNDA/CDKN1A/TICAM1/IRS2/RC3H1/TLR4/CASP3/IGLC1/NFATC2/SASH3/IGHA1/PTPRC/EXOSC3/TFRC/SYK/TNFAIP3/TP53BP1/…
SC	GOBP_GASTRULATION	185	0.369923	2.44182	0.00262467	0.00887008	ITGB5/ITGB1/GPC3/MESP1/PAF1/COL5A2/MKKS/COL4A2/RPS6/RACK1/COL6A1/ITGA7/LAMB3/TGFBR2/COL12A1/RTF1/DLD/MMP2/HSBP1/MAP2K5/CTR9/WLS/SMAD3/SFRP1/ADIPOQ/SYF2/LAMB1/PRKAR1A/WNK1/RIC8A/EXT1/COL5A1/ARFRP1/ITGAV/SFRP2/FN1/GSC/APLNR/KIF16B/PHLDB1/ITGA5/BMP4/LRP5/CUL3/DVL1/DUSP1/SOX17/ITGB2/GPI/DUSP4/PRKACA/ETV2/ATOH8/AMOT/EXOC4/LDB1/CTNNB1/ZBTB17/WNT11/ETS2/DAG1/KLF4/ACVR2A/MYADM/IL1RN/PHLDB2/SETD2/MMP15/AC…
SC	GOBP_ACTIN_POLYMERIZATION_OR_DEPOLYMERIZATION	185	0.453109	2.99092	0.00262467	0.00887008	HAX1/RDX/BRK1/MTPN/RHOA/ARPC1A/RAC1/PFN1/ARPC3/SNX9/MKKS/FLII/CAPZB/DSTN/SPTBN1/GSN/ANG/MSRB1/ARPC4/CFL2/LIMA1/TMSB4X/ARPC5L/CYFIP1/BIN1/WDR1/AIF1/ARPC2/CDC42EP2/CFL1/MSRB2/ADD1/TWF2/PFN2/ARHGAP18/EPS8/CDC42EP4/ARF6/CXCL12/CAPZA1/GRB2/CTTN/PYCARD/SPTAN1/TTC17/DBN1/DMTN/MLST8/ABL1/RASA1/BBS4/TMSB10/BAG4/CAPG/LMOD1/WASF3/ESAM/KANK1/COTL1/ABI1/WASL/CDC42EP1/TMOD1/KANK4/ARHGAP35/HCLS1/SWAP70/TWF1/KAN…
SC	GOBP_PROTEIN_STABILIZATION	183	0.565441	3.73395	0.00262467	0.00887008	PEX19/RTN4/CCT5/TCP1/HSP90AB1/PHB2/WFS1/PHB/HSP90AA1/PINK1/CCT7/CCT8/CCT6A/CCT4/PTGES3/FLOT1/HSPD1/PFN1/CRYAB/CLU/CRTAP/CREBL2/SUMO1/ATP1B3/MUL1/USP9X/PARK7/PDCD10/CAMLG/TAF9/FLOT2/PARVA/TNIP2/STX12/PRKRA/CDC37L1/GAPDH/GOLGA7/IGF1/PPIB/RPS7/RPL11/TREX1/GRN/PFN2/MFSD1/CCT3/TBRG1/BAG6/SYVN1/RPL5/TRIM44/HSPA1A/SMAD3/IFT46/PTEN/CDC37/PLPP3/PDCL3/SOX4/BAG3/SAV1/TMEM88/EFNA1/ZBED3/NCLN/BAG4/GPIHBP1/USP…
SC	GOBP_MITOTIC_SISTER_CHROMATID_SEGREGATION	169	0.347108	2.25128	0.00263852	0.00887008	CHMP3/CDC16/CHMP2A/BOD1/ANAPC11/RAN/PSMG2/DCTN2/VPS4A/PPP2R1A/TUBG2/NUDC/ATRX/NEK6/CHMP2B/RAB11A/NAA10/LCMT1/SMC3/KIF22/KPNB1/CDC26/CHMP1A/CHMP6/RAD21/NIPBL/IK/NAA50/BAZ1B/EML3/PINX1/CHMP5/CHMP4A/TUBG1/CHMP7/HNRNPU/PDCD6IP/TPR/CHMP4B/CDC23/SMC2/EML4/CHTF8/BUB3/MAD2L2/CCNB1/PCID2/CDK5RAP2/CUL3/DUSP1/SMC1A/ZW10/MAD2L1BP/RB1/KLHL22/NUMA1/PTTG1/BECN1/SLF1/ANAPC15/AKAP8L/NCAPH2/MAD1L1/RRS1/PIBF1/RMDN1…
SC	GOBP_PURINE_CONTAINING_COMPOUND_BIOSYNTHETIC_PROCESS	170	0.411955	2.68129	0.00263852	0.00887008	VCP/DGUOK/NME4/STOML2/ACSS2/ATIC/PINK1/ENO1/IMPDH2/PDHA1/ALDOA/NME2/AK2/ACSL1/NME3/PPT1/PPCS/NUDT2/SLC25A1/GUK1/MPC2/ELOVL1/NPR1/PDK2/APRT/NME1/TMSB4X/ELOVL5/AK3/HPRT1/PID1/DLD/COASY/ACLY/PARP1/TECR/ATP6V0C/ACSL3/ACAT1/MT-ATP6/ADK/H19/PAPSS2/AK1/IMPDH1/AK4/ADA/MT-CO2/DNAJC30/SHMT2/SLC35B3/UQCC3/PRTFDC1/PAPSS1/GCDH/PRPS1/PRPS2/PDK4/PPCDC/SLC25A13/ACSL5/NT5E/NPR2/PPT2/SLC35B2/MT-ATP8/ELOVL3/ACSL4/A…
SC	GOBP_REGULATION_OF_PROTEIN_LOCALIZATION_TO_MEMBRANE	169	0.47042	3.05106	0.00263852	0.00887008	CIB1/KIF5B/PGRMC1/PDCD5/ITGB1BP1/ITGB1/ATP2B4/VTI1B/MFF/CD81/PPP2R5A/MRAP/GPC3/RER1/SQSTM1/FIS1/RHOQ/AP2M1/FYN/RANGRF/MYO1C/VPS4A/GOPC/SPTBN1/GSN/ACTB/RACK1/TMEM59/INPP5K/SORBS1/CLTC/DAB2/AR/HECTD1/HRAS/RHOG/VAMP8/PID1/ARF6/PICALM/LGALS3/ZDHHC7/TMBIM1/STOM/ACSL3/DMTN/EGFR/GPER1/CDK5/LRP1/BCL2L1/GPC1/AP2B1/GDI1/PKDCC/NMT1/RAMP3/EZR/ZDHHC5/PPFIA1/CNST/ZDHHC2/ATP2C1/PIK3R1/STX8/SLC5A3/GPC6/CRKL/AKT1…
SC	GOBP_POSITIVE_REGULATION_OF_SUPRAMOLECULAR_FIBER_ORGANIZATION	170	0.494161	3.21635	0.00263852	0.00887008	LIMCH1/GPX1/ITGB1BP1/BRK1/RHOA/WASF2/MAP1B/RAC1/PFN1/CLU/SNX9/DSTN/GSN/EFEMP2/DRG1/RHOC/MAPRE1/S100A10/CFL2/RPS3/CYFIP1/DCTN1/FERMT2/BIN1/WDR1/ARL3/ARPC2/CDC42EP2/PFN2/ARL2/CDC42EP4/ARF6/GRB2/CTTN/HSPA1A/SMAD3/SYNPO/CKAP5/PYCARD/SFRP1/SLAIN2/TESK1/MLST8/ABL1/NRP1/MYOC/BAG4/LMOD1/WASF3/COLGALT1/SORBS3/LPAR1/WASL/TNXB/CDC42EP1/ID1/PXN/SYNPO2/SWAP70/TGFBR1/RGCC/APOE/FES/PAK1/APP/PLEK/CDK5RAP2/AKAP9/…
SC	GOBP_NEURON_PROJECTION_EXTENSION	171	0.280729	1.83166	0.0026455	0.00887008	RTN4/LAMB2/ITGB1/HSP90AB1/NDN/HSP90AA1/MAP1B/PPP3CB/GOLGA4/MUL1/USP9X/EIF4G2/CPNE1/RAB11A/CYFIP1/ITSN2/PLAA/VCL/TWF2/CXCL12/DPYSL2/CTTN/IQGAP1/SLIT3/SEMA3G/DBN1/NDEL1/ABL1/CDK5/NRP1/ADNP/SEMA3C/EIF2AK4/GDI1/PLXNA4/PAFAH1B1/FN1/DBNL/APOE/OLFM1/NRN1/DVL1/RYK/EDNRA/SEMA3B/MACF1/SMURF1/CXCR4/IMPACT/ARHGAP4/CTNNB1/TRPV2/SHTN1/EDN1/ZFYVE27/NRP2/NEDD4L/RNF6/NRCAM/SLIT2/RAPH1/SRF/DDR1/C9orf72/WASF1/BMPR2…
SC	GOBP_JNK_CASCADE	171	0.300041	1.95766	0.0026455	0.00887008	HMGB1/MTURN/PINK1/ZNF622/GSTP1/DAXX/AIDA/GPS1/NFKB1/DNAJA1/GPS2/HRAS/TGFBR3/STRADB/MDFIC/DIXDC1/ARHGEF6/SDCBP/SMAD3/MAP4K4/PYCARD/SFRP1/ZMYND11/HDAC3/EGFR/SIRPA/HIPK2/MAP3K7/SFRP2/GADD45A/PAFAH1B1/PJA2/RB1CC1/TAOK3/MBIP/IRAK1/KLHL31/APP/DUSP22/CRKL/PDCD4/RIPK1/TRIB1/RIPK2/PER1/GADD45G/MAP4K3/MAP2K4/RAP2A/HIPK3/MYD88/SH2D3C/CCL19/ATF2/PTGER4/TLR4/MAP3K5/CDC42/GADD45B/CDC42EP5/SH3RF1/DUSP16/MEN1/DU…
SC	GOBP_REGULATION_OF_LIPID_BIOSYNTHETIC_PROCESS	171	0.432775	2.82371	0.0026455	0.00887008	SOD1/AKR1C3/ACADVL/EIF6/THRSP/ORMDL1/ORMDL2/CREBL2/NR1H3/CAPN2/CES1/SF1/TSPO/CDK4/ANXA1/ASAH1/LEP/DGAT2/CCDC3/SORBS1/NFKB1/INSIG1/ELOVL5/FABP5/DAB2/CD74/TREX1/ADM/CTDNEP1/C3/ZBTB20/IDH1/ORMDL3/MBTPS1/DHCR7/POR/ACSL3/REST/GPER1/ABHD6/ADGRF5/IGFBP7/MLXIPL/NR1H2/FGF1/ERLIN1/AVP/PCK1/APOE/SCAP/PDK4/FBXW7/APOC1/AKT1/ABCD2/CHP1/SCARB1/BMP6/ATP1A1/MTOR/BMP2/SREBF1/LPGAT1/H6PD/SIRT3/NR1D1/RGN/SIRT1/SNAI2…
SC	GOBP_NEGATIVE_REGULATION_OF_CELL_PROJECTION_ORGANIZATION	180	0.263042	1.73181	0.00265252	0.00887008	CIB1/RTN4/DGUOK/PMP22/VIM/GDI2/RHOA/SNAPIN/FYN/CAPZB/YWHAH/MAP4/B2M/DAB2/MYLIP/PFN2/ARF6/SEMA3G/DENND5A/PTEN/THY1/TSKU/ARHGAP24/TESK1/DTNBP1/CDK5/EFNA1/NRP1/ITM2C/KANK1/LPAR1/FLNA/SEMA3C/DPYSL3/ID1/GDI1/CERS2/PAFAH1B1/UBE3A/YAP1/BAG5/PPP3CA/APOE/FKBP4/SPRY2/RYK/PRNP/SEMA3B/ABI3/ARHGAP4/GORASP1/SPP1/HES1/EVL/EFNB2/RNF6/SPOCK1/SLIT2
SC	GOBP_REGULATION_OF_ADAPTIVE_IMMUNE_RESPONSE	180	0.26554	1.74825	0.00265252	0.00887008	NDFIP1/HMGB1/CD81/HSPD1/PPP3CB/ANXA1/HLA-DRA/HLA-DRB1/HLA-E/B2M/PARP3/HLA-A/HLA-B/C3/PYCARD/BCL6/HMCES/FADD/NECTIN2/MAP3K7/KMT5B/HLA-F/ADA/EIF2AK4/TNFSF13/TNFRSF14/MLH1/TNFSF13B/IL6ST/AZGP1/IL1R1/CD4/FZD5/MAD2L2/DUSP22/THOC1/IRF7/MEF2C/RIPK2/PTPN6/TRIM27/STX7/TREM2/TNFRSF1B/ZBTB1/STAT6/ARID5A/CCL19/RC3H1/SIRT1/SASH3/PTPRC/CD1C/EXOSC3/DENND1B/CLEC4G/HLX/ZBTB7B/TFRC/CD55/TNFAIP3/TP53BP1/CD40/RIPK3/…
SC	GOBP_REGULATION_OF_BLOOD_PRESSURE	180	0.305984	2.01452	0.00265252	0.00887008	SOD1/RHOA/MKKS/GNA12/ADH5/LEP/NPR1/AGTRAP/COL1A2/AR/EDNRB/ADM/RAMP2/ATP2B1/SMAD3/GAS6/ADIPOQ/ATP6AP2/POMC/PRCP/NPY1R/BBS4/WNK1/PPARG/OXT/NPR3/CYBA/NR2F2/ADRB2/EXT1/CD34/LVRN/AVP/STK39/SNX5/CMA1/RPS6KA2/ECE1/CTSG/GNA13/AVPR2/ID2/CPA3/LRP5/NPR2/LNPEP/EDNRA/ERAP1/RNLS/ACVRL1/DDAH1/ATP1A1/SCPEP1/ACTA2/ATP1A2/GJA5/EDN1/GNA11/HMOX1/HBB/AGT/VEGFC/TPM1/ANPEP/SGK1/CORO2B/PDGFB/ADM5/BMPR2/AGTR1/SUCNR1
SC	GOBP_MICROTUBULE_BASED_TRANSPORT	188	0.309841	2.04629	0.00265252	0.00887008	SOD1/KIF5B/UBB/HSPA8/UXT/SNAPIN/MAP1B/IFT43/IFT57/BLOC1S1/IFT27/AP3S1/UCHL1/COPG1/HSPB1/ARMCX3/SSNA1/DYNC1I2/FLOT2/DPCD/DCTN1/RAB1A/ARL3/RAB6A/OFD1/HSBP1/IFT52/ARL8B/AP3D1/SLC9A3R1/IFT46/BLOC1S4/BAG3/NDEL1/PURA/DTNBP1/SFPQ/RHOT2/COPG2/KIFAP3/KIF3B/AP3B1/HNRNPU/DYNC2H1/TRAK2/PAFAH1B1/LAMP1/ARL8A/TRAK1/SUN1/APP/FYCO1/TTLL1/MAP1A/DST/BICD2/CLIP3/LRPPRC/FBXW11/ARHGAP21/NME5/RHOT1/DNAAF2/HTT/PEX14/BLO…
SC	GOBP_NEGATIVE_REGULATION_OF_CELL_GROWTH	182	0.334278	2.19984	0.00265252	0.00887008	RTN4/NDUFA13/PHB/FHL1/ENO1/YY1/CRYAB/CDKN2C/MUL1/PPT1/TOMM70/PPP2R1A/BTG1/NPR1/RACK1/OSGIN2/SMARCA2/PPP2CA/DAB2/BST2/IP6K2/ADIPOR1/NDUFS3/SERTAD3/HSPA1A/SMAD3/CCDC85B/SLIT3/SFRP1/BCL6/SEMA3G/EI24/JADE1/CDK5/NRP1/HYAL2/SEMA3C/SFRP2/SESN2/BCL2/CDKN2D/SERTAD2/DNAJB2/ADAM15/FBP1/CGRRF1/RYK/SOX17/PI16/SEMA3B/FRZB/CDKN2AIP/ACVRL1/TSPYL2/SH3BP4/ARHGAP4/EAF2/CDKN1B/SPP1/RGS2/RB1/OSGIN1/WNT11/CDKN1A/MSX1/…
SC	GOBP_CELLULAR_RESPONSE_TO_RADIATION	182	0.344932	2.26995	0.00265252	0.00887008	XPA/XRCC6/XRCC5/YY1/HSPA5/ATF4/CRYAB/EEF1D/TRIAP1/MGMT/TMEM109/CRY2/EIF2S1/PCNA/COPS9/SMPD1/NPM1/SWI5/MFAP4/HRAS/TREX1/MMP2/GRB2/USP47/CARD16/NUCKS1/SFRP1/NIPBL/PARP1/TNKS1BP1/AQP1/XPC/MAPK14/CRIP1/GTF2H5/TIMP1/CYBA/HYAL2/KDM1A/BCL2L1/RPL26/IFI16/CUL4B/CLOCK/SPIDR/SFRP2/EIF2AK4/MME/HSF1/GADD45A/NMT1/YAP1/RHOB/TMEM161A/PIK3R1/ERCC1/N4BP1/NET1/TANK/BRCC3/IMPACT/C9orf116/RHBDD1/ZBTB1/POLD3/CDKN1A/RU…
SC	GOBP_HORMONE_MEDIATED_SIGNALING_PATHWAY	188	0.406259	2.68307	0.00265252	0.00887008	NR3C1/ADIPOR2/PHB2/PHB/CSNK2B/PTGES3/RHOA/PLPP1/PMEPA1/UFSP2/ACSL1/PGRMC2/NR1H3/PRMT2/RBFOX2/DDX5/DDRGK1/RWDD1/NCOA4/YWHAH/CRY2/PARK7/DAXX/RHOXF1/DDX17/UBA5/TAF7/RXRB/DAB2/AR/ADIPOR1/EGLN2/SFRP1/PARP1/LATS2/WBP2/UFL1/NCOA1/PRCP/GPER1/LANCL2/PTPN11/PPARG/ZMIZ1/CALR/SAFB/KDM1A/CRHBP/CLOCK/THRB/DDX54/CALCOCO1/UBE3A/YAP1/THRA/GTF2H1/PAGR1/PAK1/LMO3/BMP4/FKBP4/RXRA/ZBTB7A/UFM1/PER1/CNOT2/NR1D2/ESRRA/N…
SC	GOBP_VACUOLE_ORGANIZATION	180	0.52499	3.45641	0.00265252	0.00887008	CHMP3/ANXA2/EMC6/SH3GLB1/PINK1/RAB7A/GABARAP/SNAPIN/MFN2/TMEM9/NSFL1C/PPT1/VPS35/VPS4A/GABARAPL2/LAMTOR1/SRPX/RALB/CHMP2B/CCDC115/RNF5/RAB5A/TPP1/RAB34/ATG3/STX12/RAB1A/VPS16/RAB20/NUPR1/FEZ2/MAP1LC3B/GABARAPL1/ATG5/TREX1/GRN/WDR45B/MTMR3/ARL8B/PHF23/MBTPS1/HEXB/UBQLN2/ATP6AP2/PIP4K2B/BAG3/RAB7B/MAP1LC3A/ATG101/WIPI2/RAB1B/NAGLU/HPS1/GBA/FIG4/UBQLN1/ATG9A/RAB14/CHMP4A/ATG12/EXT1/LAPTM5/GAA/ATG7/A…
SC	GOBP_CYTOSOLIC_CALCIUM_ION_TRANSPORT	175	0.242553	1.58749	0.00265957	0.00887008	TMBIM6/ATP2B4/CAV1/CALM1/SMDT1/SRI/FYN/DDIT3/YWHAE/NOL3/CALM2/RASA3/GSTO1/FKBP1A/VDAC1/ATG5/CALM3/ATP2B1/MCUB/THY1/ABL1/GPER1/PSEN2/CYBA/MICU3/RAMP3/BCL2/GSTM2/APLNR/PKD2/CORO1A/TRDN/TPCN1/CACNA2D1/JSRP1/PTPN6/PRNP/CAMK2D/FKBP1B/CCL3/PRKACA/ITPR2/MICU1/ATP1A2/TRPV2/HTT/AFG3L2/CCL19/CXCL10/PTPRC/SLC35G1/PRKD1/SNCA/GP1BB/ANK2/FGF2/DIAPH1/PLN/HTR2B/CCL21/CLIC2/CAPN3/CHERP
SC	GOBP_REGULATION_OF_T_CELL_PROLIFERATION	168	0.294009	1.9068	0.00265957	0.00887008	NDFIP1/HMGB1/CD81/ANXA1/LEP/HLA-DRB1/HLA-E/GPAM/HLA-DPA1/HLA-A/HLA-DPB1/RPS3/AIF1/IGF1/TGFBR2/EFNB1/LGALS3/DHPS/PYCARD/VSIG4/PRKAR1A/HLA-DMB/FADD/LRRC32/GPNMB/SOS1/TNFRSF14/STAT5B/TNFSF13B/CEBPB/IL6ST/CORO1A/BMP4/TNFRSF21/NCK1/RIPK2/PTPN6/PRNP/PELI1/RAC2/HES1/IGF2/TNFRSF1B/CTNNB1/CD276/CCL19/CD86/RC3H1/CASP3/VCAM1/ARG2/CBLB/SDC4/SASH3/PTPRC/MAD1L1/SH3RF1/LGALS9/SOS2/CLEC4G/ZBTB7B/TFRC/SYK/CD55/TY…
SC	GOBP_REGULATION_OF_RAS_PROTEIN_SIGNAL_TRANSDUCTION	184	0.342783	2.26269	0.00265957	0.00887008	ITGB1/RDX/GABARAP/FLOT1/RABGEF1/MFN2/SQSTM1/RAC1/COL3A1/IQSEC1/PDCD10/ARHGDIB/CRK/RASA3/CYTH3/IGF1/KCTD10/RGL2/DENND4C/EPS8/ARF6/STK19/MAP4K4/BCL6/SGSM3/ARHGDIA/PDGFRB/ARHGAP24/LRRC59/DLC1/ABL1/RASA1/NRP1/MYOC/STAMBP/KANK1/MAPKAP1/SHOC2/GBF1/LPAR1/OGT/SPRY1/TNFAIP1/LPAR6/ARHGAP35/PPP2CB/RASIP1/HEG1/FBXO8/RASA2/APOE/RASGRF2/FBP1/NET1/SPRY2/CUL3/CSF1/STARD13/RABL3/RALBP1/NOTCH1/CYTH1/ABCA1/MAPRE2/L…
SC	GOBP_CARTILAGE_DEVELOPMENT	184	0.343233	2.26566	0.00265957	0.00887008	EFEMP1/MKKS/NFIB/COL3A1/DDRGK1/LEP/PBXIP1/CTSK/CD44/TGFBR2/ADAMTS12/SMAD3/MGP/ANXA6/MDK/ECM1/POR/TSKU/GLG1/TGFBI/MAPK14/OSR2/SERPINH1/TIMP1/PTPN11/HYAL2/LOXL2/EXT1/ZNF219/SFRP2/KAT2A/PRRX1/HOXA5/PKDCC/ZBTB16/THRA/TGFBR1/MAF/ZEB1/SNX19/COL1A1/BMP4/BGN/MEF2C/SULF2/CHADL/FRZB/ESRRA/ACVRL1/CREB3L2/BMP6/RB1/CTNNB1/THBS3/BMP2/WNT11/ARID5A/PTH1R/LNPK/ATF2/EDN1/MSX1/SMAD5/LTBP3/MEF2D/MUSTN1/SNAI2/SRF/SMA…
SC	GOBP_PROTEIN_METHYLATION	184	0.365932	2.41549	0.00265957	0.00887008	NELFE/TRMT112/FAM98A/SNW1/PWP1/PAF1/WDR61/PCMT1/PRMT2/DPY30/ETF1/PIH1D1/MCRS1/IWS1/RNF20/BTG1/SNRPB/ATRX/EEF1AKMT1/ARID4A/LMNA/KMT2E/LCMT1/GSPT1/SMYD2/RAB6A/COPRS/RTF1/CTR9/PHF1/CHTOP/NNMT/PRMT5/NTMT1/SETD6/WDR5/KMT5B/KDM1A/SETD5/OGT/SMYD3/PRDM2/PHF20/NFYB/ARMT1/EED/EEF2KMT/ICMT/PAGR1/KMT2C/PCMTD2/PRDM4/FBL/BTG2/SNRPD3/HCFC1/PRMT1/METTL18/SETMAR/SETD3/MTF2/CXXC1/BRD4/PYGO2/RLF/CTNNB1/PRMT9/SMYD5/…
SC	GOBP_RESPONSE_TO_TEMPERATURE_STIMULUS	175	0.392661	2.56993	0.00265957	0.00887008	VCP/SOD1/ACADVL/HSP90AB1/PLIN1/HSP90AA1/HSPD1/LPL/CIRBP/HTRA2/SUMO1/YWHAE/DNAJB1/FOXO1/EIF2S1/CD14/HIKESHI/DAXX/SLU7/STUB1/NR2F6/DNAJA1/EIF2B1/IGF1/UCP2/ACADM/METRNL/EIF2B3/HSBP1/ADM/CXCL12/RNF34/CIDEA/ATP2B1/HSPA1A/EIF2B5/GLRX2/BAG3/ZFAND1/PDCD6/HSBP1L1/DNAJB6/DNAJC3/ADRB2/LXN/IGFBP7/CD34/THBS1/MT-CO2/EIF2AK4/DNAJA2/FGF1/SCARA5/TPR/HSF1/NFKBIA/THRA/IRAK1/MAPKAPK2/AKT1/EIF2B2/EIF2B4/CXCR4/PRKACA/…
SC	GOBP_REGULATION_OF_PEPTIDE_TRANSPORT	178	0.24543	1.60624	0.00266667	0.00887008	SERP1/JAGN1/NDUFAF2/PPP3CB/GLUD1/ADRA2A/SRI/RBP4/MPC2/LEP/HMGN3/BAD/HLA-DRB1/UQCC2/CDK16/UCP2/CD74/AIMP1/GLUL/NNAT/ICA1/SFRP1/PIM3/SOX4/REST/GPER1/HADH/INHBB/OXCT1/PTPN11/CRHBP/CLOCK/RAB8B/TCF7L2/PPP3CA/PFKL/PCK2/ACVR1C/LRP5/OSBP/KLF7/ACSL4/TCIRG1/FKBP1B/EFNA5/STX4/SREBF1/IRS2/NR1D1/LRRC8A
SC	GOBP_RECEPTOR_SIGNALING_PATHWAY_VIA_STAT	178	0.265685	1.7388	0.00266667	0.00887008	CAV1/PWP1/GGNBP2/FYN/STAT1/STAT5A/PPP2R1A/LEP/ARL2BP/JAK1/PPP2CA/IGF1/ADIPOR1/CTR9/OCIAD1/IL10RB/NMI/PIAS1/PIGU/CNOT7/CSF1R/CDK5/PPARG/STAMBP/TNFRSF1A/HSF1/GADD45A/STAT5B/HCLS1/IL6ST/PKD2/OCIAD2/SH2B3/LEPROT/OSBP/CYP1B1/MGAT5/HES1/HGS/NOTCH1/IFNAR2/STAT6/STAT3/SOCS2/BCL3/AGT/PTPRC/PIBF1/CCL2/SOCS1/IL10RA/TYK2/GHR/CD40/JAK2/SOCS3/TNFRSF18/ELP2/CD300A
SC	GOBP_REGULATION_OF_CELL_SIZE	178	0.280756	1.83743	0.00266667	0.00887008	RTN4/LAMTOR4/HSP90AB1/RDX/MTPN/RHOA/MAP1B/RAC1/GOLGA4/IST1/CLNS1A/EIF4G2/CCDC51/LAMTOR5/RAB11A/E2F4/CYFIP1/TWF2/CXCL12/DPYSL2/CTTN/MSN/SLC9A3R1/SEMA3G/PTEN/AQP1/DBN1/NDEL1/ABL1/CDK5/NRP1/TMEM123/KDM1A/ADNP/SEMA3C/GDI1/PLXNA4/PAFAH1B1/FN1/EZR/RB1CC1/DBNL/APOE/CRABP2/PLEK/AQP11/OLFM1/RYK/SEMA3B/MACF1/SLC12A4/ARHGAP4/DEPTOR/EFNA5/SPP1/SLC12A7/MTOR/TRPV2/SHTN1/EDN1/LRRC8A/ZFYVE27/RNF6/NRCAM/ANO6
SC	GOBP_REGULATION_OF_LYMPHOCYTE_DIFFERENTIATION	177	0.29073	1.90389	0.00266667	0.00887008	SOD1/XRCC6/NDFIP1/HMGB1/RHOA/PPP2R3C/PRDX2/ANXA1/PRELID1/HLA-DRA/XBP1/BAD/HLA-DRB1/FBXO7/DROSHA/CD74/TGFBR2/AP3D1/SFRP1/BCL6/GAS6/MDK/ZFP36L1/SOX4/ABL1/ZFP36L2/ZMIZ1/CLPTM1/FGL2/FOXO3/ADA/AP3B1/SOS1/PRKDC/CD83/KAT2A/STAT5B/ZBTB16/AXL/PCK1/ZEB1/ID2/PCID2/BMP4/RIPK2/PTPN6/IL15RA/SLAMF8/CD2/ZBTB1/CCL19/SART1/CD86/RC3H1/CYP26B1/SASH3/PTPRC/SH3RF1/LGALS9/SOS2/HLX/SOCS1/ZBTB7B/RARA/SYK
SC	GOBP_DNA_PACKAGING	177	0.299989	1.96452	0.00266667	0.00887008	NDN/ANP32B/CDKN1C/PAF1/NAP1L4/BANF1/ATRX/DAXX/NPM1/CENPW/NAA10/POLE3/TRIM28/CHMP1A/CTR9/MIS18A/DNAJC9/MPHOSPH8/MBD2/SART3/BAZ1A/ASF1A/RSF1/BAZ1B/NAP1L1/GPER1/CTBP1/SRPK1/KDM1A/HMGB2/FAM172A/SMYD3/TPR/SMC2/TSPYL1/UBN1/SCMH1/BRD2/WAPL/SET/ITGB3BP/TSPYL4/NAP1L5/TSPYL2/RB1/HDAC5/PIK3CA/SIRT1/CBX3/SAMD1/AKAP8L/NCAPH2/ACIN1/PHF13/ZNFX1/AIFM1/SMARCA5/RRP8/CABIN1/SIRT6/EZH1/SUV39H1/CHAF1A/PARP10/TSPYL5/S…
SC	GOBP_PROTEIN_DNA_COMPLEX_SUBUNIT_ORGANIZATION	178	0.369062	2.41536	0.00266667	0.00887008	HMGB1/ANP32B/YY1/PAF1/NAP1L4/PIH1D1/MCRS1/ATRX/DAXX/TAF9/NPM1/CENPW/TFPT/TAF7/TAF12/POLE3/TCF4/RRN3/UCHL5/POLR1E/GTF2A2/MIS18A/DNAJC9/VPS72/SART3/BAZ1A/TAF11/ASF1A/ZNHIT1/RSF1/SMARCD2/NAP1L1/GMNN/ACTR8/SMARCE1/ANP32E/TAF3/DMAP1/GTF2H5/TAF10/SSRP1/GTF2B/BRF2/HMGB2/SMYD3/TSPYL1/THRA/SMARCC1/BRD2/CENPT/BPTF/SET/ITGB3BP/TSPYL4/NAP1L5/TAF13/TSPYL2/RPL23/SMARCD3/ACTL6A/RB1/CENPO/RUVBL2/TAF1C/TBP/MCM3AP…
SC	GOBP_TUMOR_NECROSIS_FACTOR_SUPERFAMILY_CYTOKINE_PRODUCTION	178	0.405118	2.65133	0.00266667	0.00887008	CD36/HMGB1/DDT/GSTP1/LPL/CLU/MIF/TSPO/LEP/HSPB1/PARK7/CD14/UBE2J1/HLA-E/IGF1/AKAP12/TREX1/ZBTB20/CIDEA/PYCARD/GAS6/TWIST1/ADIPOQ/POMC/SIRPA/FADD/PTPN11/CYBA/TYROBP/DHX9/IFNGR1/CD34/THBS1/GPNMB/SPON2/LY96/AXL/FZD5/LBP/NFKBIL1/APP/PIK3R1/ANGPT1/MAPKAPK2/RIPK1/CLEC4A/RIPK2/PTPN6/TRIM27/CCL3/DICER1/ERRFI1/MYD88/CD2/TREM2/CD47/STAT3/ARID5A/CYBB/TICAM1/CCL19/IFIH1/CD86/BCL3/TLR4/ARG2/SASH3/PTPRC/LGALS9…
SC	GOBP_NEGATIVE_REGULATION_OF_DNA_BINDING_TRANSCRIPTION_FACTOR_ACTIVITY	178	0.411096	2.69045	0.00266667	0.00887008	CEBPG/PHB2/MTURN/NDN/WFS1/TAX1BP1/DAP/SRI/DDIT3/PRMT2/COMMD7/SUMO1/PRDX2/RBCK1/COMMD6/PSMD10/SIGIRR/CAT/TMSB4X/NUPR1/CTNNBIP1/KEAP1/RWDD3/COMMD1/MAP2K5/BRMS1/PYCARD/GAS6/TWIST1/TFDP1/SFRP4/UFL1/PURA/ID3/SETD6/CCDC22/TAF3/USP7/CDK5RAP3/KDM1A/FLNA/EIF2AK4/ID1/PPP2CB/TCF7L2/NFKBIA/PKD2/TCEAL7/PIAS4/IRAK1/MAD2L2/NFKBIL1/ID2/TNFRSF4/TRIB1/PIM1/WWP2/PRNP/TRIM21/MDFI/CHP1/CYP1B1/PELI1/CMKLR1/HES1/RB1/KL…
SC	GOBP_REGULATION_OF_NEURON_DIFFERENTIATION	187	0.264116	1.73957	0.0026738	0.00887008	LSM1/RHOA/MAP1B/CYB5D2/YWHAG/YWHAH/TUG1/CPNE1/B2M/BIN1/EDNRB/CTDSP1/DTX1/TCF4/FGFR1/EIF4G1/CXCL12/DIXDC1/DPYSL2/MMD/SFRP1/BCL6/NCOA1/NBL1/REST/CDK5RAP3/GDPD5/CALR/FOXO3/SIX1/SFRP2/EIF2AK4/HMG20B/ROCK1/BCL2/ID4/ZEB1/GPRC5B/APP/TRIM32/ID2/CSNK1E/BMP4/CDK5RAP2/TCF12/MEF2C/IMPACT/NEPRO/BMP6/HEY1/HES1/NOTCH1/BMP2/ZHX2/SOCS2/ZC4H2/NRCAM/NOTCH3/HMG20A/ARHGEF2/RARA/CDK5RAP1/HEYL/JAG1/TCF3
SC	GOBP_CELLULAR_MODIFIED_AMINO_ACID_METABOLIC_PROCESS	187	0.321161	2.11529	0.0026738	0.00887008	SOD1/ALDH9A1/GPX1/ATIC/EEF1G/GPX4/ARL6IP5/GSTP1/GLO1/MGST2/MTHFS/CLIC1/ASS1/CKB/PARK7/NFE2L2/GSTK1/CPQ/GSTO1/GSTA4/ALDH4A1/ETHE1/SLC16A2/PCYOX1/FPGS/CTSK/SERINC3/CRAT/ACADM/GSTM4/IDH1/ABHD16A/OSBPL8/GLRX2/POR/AASDHPPT/CTSB/ABHD12/SERINC1/HPGDS/HAGH/BHMT2/TMLHE/GSTM5/PTGES2/CTNS/SLC6A8/PLSCR1/SHMT2/GSTM3/PTDSS1/ICMT/GSTM2/PLOD2/GGH
SC	GOBP_PEPTIDYL_LYSINE_ACETYLATION	187	0.372188	2.45137	0.0026738	0.00887008	MORF4L1/EID1/MORF4L2/HINT2/BLOC1S1/PIH1D1/MCRS1/IWS1/ACTB/PARK7/MEAF6/THAP7/TAF9/PBXIP1/ING4/TAF7/TAF12/POLE3/ATG5/KAT5/BAG6/VPS72/TWIST1/WBP2/NAA50/POR/NCOA1/SOX4/CAMK1/USP22/JADE1/CTBP1/DMAP1/MAP3K7/WDR5/TAF10/ENY2/KAT14/SETD5/CLOCK/GTF2B/OGT/SGF29/KAT2A/PHF20/NFYB/MRGBP/MLLT1/MBIP/SUPT7L/SET/PER1/HCFC1/YEATS4/MSL3/RAPGEF3/ACTL6A/PYGO2/ING3/HDAC5/LDB1/APBB1/ARID5A/TADA1/RUVBL2/ATF2/SIRT1/PHF20L…
SC	GOBP_VESICLE_LOCALIZATION	187	0.384204	2.53051	0.0026738	0.00887008	CHMP3/KIF5B/CHMP2A/TMED10/PINK1/YKT6/RAB7A/PEF1/PREB/TFG/SNAPIN/ATP9A/BLOC1S1/MKKS/PPP6C/DCTN2/AP3S1/MYO1C/VPS4A/TSG101/RAB11A/RAB1A/SAR1A/TMEM230/PICALM/F8A1/CHMP6/USO1/SDCBP/AP3D1/ARFGAP3/BLOC1S4/PTEN/TBC1D23/KLHL12/TESK1/NDEL1/DTNBP1/PDCD6/CDK5/BBS4/ACTN4/SEC16A/KIFAP3/GBF1/KIF3B/AP3B1/BBS7/PDCD6IP/RAB11B/WASL/TRAK2/PAFAH1B1/MYO1D/TMED2/TRAK1/SNF8/FYCO1/ARFGAP2/CUL3/STARD3/WIPI1/FBXW11/TCIRG1/…
SC	GOBP_POSITIVE_REGULATION_OF_PROTEIN_CONTAINING_COMPLEX_ASSEMBLY	187	0.420124	2.7671	0.0026738	0.00887008	VCP/CD36/SH3GLB1/HSP90AA1/PINK1/BRK1/RHOA/MAP1B/RAC1/PFN1/CLU/SNX9/SUMO1/PIH1D1/DRG1/RHOC/PARK7/RACK1/MAPRE1/RPS3/STUB1/DCTN1/FERMT2/BIN1/ARL3/ARPC2/CDC42EP2/PFN2/ARL2/EIF4G1/CDC42EP4/ARF6/GRB2/CTTN/MSN/LGALS3/HSPA1A/CKAP5/PYCARD/SLAIN2/MLST8/BAG4/CAPG/ISG15/LMOD1/CDH5/TPPP3/ASAP1/SPIDR/PIEZO1/FNIP2/NR1H2/CDC42EP1/LCP1/RASIP1/CRBN/FES/PAK1/PLEK/CDK5RAP2/AKAP9/NCK1/PPP2R5B/FCHSD2/CDKN1B/ICE1/MYD88…
SC	GOBP_NEGATIVE_REGULATION_OF_PROTEIN_LOCALIZATION	187	0.480618	3.16553	0.0026738	0.00887008	CTNNA1/ITGB1BP1/NDFIP1/CD36/BTF3/OS9/PPP2R5A/JAGN1/GDI2/MRAP/NDUFAF2/RHOQ/ADRA2A/AP2M1/NR1H3/NSFL1C/SUMO1/VPS35/GOPC/PARK7/APOD/UBE2J1/TMEM59/TXN/INPP5K/SNX3/PKIG/TAX1BP3/ERLEC1/INSIG1/DNAJA1/DERL2/CLTC/DAB2/DPH3/UCP2/HECTD1/SNX12/PID1/COMMD1/MDFIC/ARF6/PICALM/SERGEF/SFRP1/LMAN1/LZTS2/PIM3/TMBIM1/LATS2/ADIPOQ/BAG3/DMTN/REST/CDK5/HADH/INHBB/BAG4/PTPN11/BCL2L1/GDI1/PKDCC/PPFIA1/PPP3CA/APOE/PFKL/SNX…
SC	GOBP_REGULATION_OF_PROTEASOMAL_PROTEIN_CATABOLIC_PROCESS	181	0.563179	3.70565	0.00268097	0.00887008	VCP/GPX1/HSP90AB1/BCAP31/CAV1/PSMC2/UBB/PINK1/PSME1/GABARAP/PSMC5/UBXN1/RBX1/PITHD1/PSMD14/PSMC3/EIF3H/CLU/PSMC4/RNF185/SUMO1/GNA12/PSMC1/DDRGK1/PSMF1/GABARAPL2/PARK7/RACK1/PSME2/PSMD10/CAMLG/ARAF/NFE2L2/TAF9/STUB1/ZFAND2A/NUPR1/HSPBP1/HERPUD1/DAB2/KEAP1/HECTD1/RPL11/UCHL5/WAC/COMMD1/UBE2K/CEBPA/F8A1/SDCBP/BAG6/TMEM259/HSPA1A/RNF40/ECSCR/CSNK1A1/MKRN2/UBQLN2/PIAS1/UFL1/SUMO2/ALAD/PSME3/GBA/USP7/U…
SC	GOBP_CYTOSKELETON_DEPENDENT_INTRACELLULAR_TRANSPORT	192	0.333867	2.19966	0.00268817	0.00887008	SOD1/KIF5B/UBB/HSPA8/TUBB/UXT/SNAPIN/MAP1B/IFT43/IFT57/BLOC1S1/IFT27/AP3S1/UCHL1/MYO1C/TUBA1A/COPG1/HSPB1/ARMCX3/SSNA1/DYNC1I2/FLOT2/DCTN1/RAB1A/ARL3/RAB6A/HSBP1/IFT52/ARL8B/F8A1/AP3D1/IFT46/BLOC1S4/TUBA1B/BAG3/NDEL1/PURA/DTNBP1/ACTN4/SFPQ/RHOT2/COPG2/KIFAP3/KIF3B/AP3B1/HNRNPU/SUN2/DYNC2H1/WASL/TRAK2/PAFAH1B1/MYO1D/LAMP1/HOOK2/ARL8A/TRAK1/SUN1/APP/FYCO1/MAP1A/DST/BICD2/CLIP3/LRPPRC/FBXW11/ARHGAP2…
SC	GOBP_BIOLOGICAL_PROCESS_INVOLVED_IN_INTERACTION_WITH_HOST	192	0.460375	3.03315	0.00268817	0.00887008	CHMP3/ITGB5/TCP1/ITGB1/PHB/CAV1/CD81/CHMP2A/LGALS1/RAB7A/THOC7/BSG/SIVA1/P4HB/IST1/VAPA/VPS4A/GSN/CAV2/RNASEK/HLA-DRB1/FUCA2/SLC1A5/SMPD1/PPIA/TSG101/CHMP2B/SNX3/DYNLT1/RPSA/IFITM3/SLC52A2/CD74/PC/VAMP8/CHMP1A/ARL8B/IFITM2/EXOC7/CHMP6/KPNA3/DDX39B/HSPA1A/SLC3A2/GAS6/IFITM1/EGFR/CTSB/NRP1/CHMP5/NECTIN2/MRC1/CHMP4A/HYAL2/CTSL/BCL2L1/CHMP7/LY6E/THOC2/ATG7/ITGAV/PLSCR1/TNFRSF14/CHMP4B/EXOC2/LAMP1/AVP…
SC	GOBP_POSITIVE_REGULATION_OF_INTRACELLULAR_TRANSPORT	192	0.480012	3.16253	0.00268817	0.00887008	UBE2L3/CIB1/ANXA2/PDCD5/ITGB1BP1/HSP90AB1/BCAP31/ANP32B/MFF/CD81/SH3GLB1/RDX/PINK1/UBE2D3/NCBP2/SNAPIN/FIS1/RAN/HTRA2/FYN/OAZ1/YWHAE/MYO1C/LEP/SAE1/PDCD10/UBE2J2/SAR1A/UBL5/DAB2/EHD2/HRAS/TRIM28/TOMM7/KHDRBS1/STX18/MSN/SMAD3/GAS6/HUWE1/EHD1/HDAC3/EDEM2/STOM/BAG3/MAPK14/ZFAND1/SCP2/CAMK1/TM9SF4/CDK5/RBM22/DMAP1/BAP1/TMEM30A/MTMR2/HYAL2/ABLIM3/DHX9/PPM1A/EMD/FLNA/TARDBP/ERGIC3/TPR/NMT1/TCF7L2/EZR/H…
SC	GOBP_RESPONSE_TO_REACTIVE_OXYGEN_SPECIES	192	0.511804	3.37199	0.00268817	0.00887008	SOD1/AKR1C3/GPX1/CD36/APEX1/PINK1/PRDX1/OSER1/GSTP1/RBX1/PRDX5/CRYAB/FBLN5/FYN/CAPN2/PRDX2/STAT1/ANXA1/PARK7/NQO1/APOD/PDCD10/BAD/PCNA/PDK2/RACK1/TXN/NFE2L2/CRK/CCS/CAT/RPS3/ROMO1/PPIF/UCP2/PRDX3/TREX1/MMP2/HEBP2/TXNIP/SIGMAR1/SOD3/MPV17/AQP1/GLRX2/PDGFRB/STK24/SESN1/ABL1/EGFR/BNIP3/MAP1LC3A/STK25/H19/SIRPA/ZNF580/SETX/HYAL2/FOXO3/RELA/PDGFD/HSF1/PPP2CB/SESN2/UBE3A/BCL2/TRAP1/ENDOG/PXN/AXL/KLF2/I…
SC	GOBP_REGENERATION	179	0.342785	2.25066	0.00269542	0.00887008	CTNNA1/GPX1/LAMB2/CD81/ATIC/MTPN/MAP1B/PFKFB1/TSPO/ANXA1/PTPRF/APOD/PCNA/CCND1/CPQ/NINJ2/IGF1/FPGS/UCP2/RPS15/TGFBR2/GRN/TGFBR3/MMP2/ADM/CXCL12/UPF2/GAS6/PTEN/NNMT/MDK/NINJ1/PRMT5/THY1/STK24/NDEL1/FLNA/CD9/PRRX1/LCP1/CERS2/YAP1/BCL2/CEBPB/AKIRIN1/AXL/PPP3CA/PRPS2/ADAM15/SRSF5/GFER/MAP2K1/BIN3/FKBP1B/CDKN1B/SPP1/NOTCH1/KPNA1/DAG1/KLF4/CDKN1A/RGN/JUN/HMOX1/CSNK2A2/MUSTN1/GJA1/MYC
SC	GOBP_INOSITOL_LIPID_MEDIATED_SIGNALING	176	0.274136	1.79707	0.0027027	0.00887008	HAX1/NTRK2/PI4KB/LEP/MYDGF/CAT/C1QBP/IGF1/RGL2/PIK3IP1/FGFR1/DCN/SLC9A3R1/PTEN/TWIST1/PDGFRB/ZFP36L1/PLCD1/CSF1R/EGFR/GPER1/GAB2/MYOC/NPR3/EXOC1/STAMBP/MAZ/PRR5/OGT/HCST/PDGFD/FN1/UBE3A/EZR/HCLS1/PIK3R1/ANGPT1/AKT1/INSR/PTPN6/PLCL2/PDGFC/ADAP2/TEK/KDR/TREM2/SELP/PIK3CA/BECN1/EDN1/PTPN13/SIRT1/PEAR1/FGR/AGT/PI4KA/PLCB4/PDGFRA/PDGFB/ROR1/FGF2/PIP5K1B/PLXNB1/JAK2/HTR2B
SC	GOBP_TEMPERATURE_HOMEOSTASIS	176	0.387672	2.54134	0.0027027	0.00887008	ACADVL/GPX1/ADIPOR2/RBPJ/CD36/NRDC/CAV1/GNAS/PTGER3/MFN2/SQSTM1/ACOT13/ATF4/ACSL1/DDIT3/NR1H3/FABP4/LEP/FOXO1/TFE3/DECR1/ALDH1A1/PEMT/FH/EPAS1/RHEB/FABP5/EDNRB/BSCL2/UCP2/G0S2/ADIPOR1/CIDEA/HDAC3/ADIPOQ/MFAP2/ADAMTS5/HADH/IP6K1/ABHD6/DHRS7B/SCD/OXT/NPR3/ADRB2/KDM1A/OGT/NOVA1/NR1H2/ID1/HSF1/CEBPB/THRA/HOXC10/LNPEP/ELOVL3/PRKAB2/PLCL2/GADD45G/CXCR4/PDGFC/ALPL/CMKLR1/NOTCH1/RB1/TLE3/ZNF423/TRPV2/STA…
SC	GOBP_REGULATION_OF_CARBOHYDRATE_METABOLIC_PROCESS	176	0.392427	2.57251	0.0027027	0.00887008	EIF6/GPD1/RANBP2/PFKFB1/BCKDK/LEP/DGAT2/FOXO1/BAD/PDK2/INPP5K/SORBS1/LCMT1/NFKB1/NUPR1/JMJD8/IGF1/CLTC/ACADM/PPP1CA/ADIPOR1/TREX1/IGFBP4/ARPP19/ARL2/ZBTB20/SDHAF3/PGAM1/FAM3C/NNMT/ADIPOQ/POMC/GPER1/PPP1CB/PRKAG1/PGP/DUSP12/USP7/WDR5/DDIT4/MLXIPL/OGT/PPP4R3B/CLK2/KAT2A/SESN2/PHLDA2/PDK4/APP/FBP1/PLEK/ZBTB7A/AKT1/GPT/C1QTNF1/INSR/EPM2AIP1/KHK/IGF2/STAT3/PTH1R/GIT1/IRS2/RGN/SLC25A12/NCOA2/SIRT1/LHCG…
SC	GOBP_REGULATION_OF_HISTONE_MODIFICATION	176	0.404829	2.65381	0.0027027	0.00887008	NELFE/C6orf89/PINK1/EID1/SNW1/PAF1/TRIP12/WDR61/HPF1/PIH1D1/MCRS1/IWS1/RNF20/PARK7/ATRX/THAP7/LMNA/KDM5A/KMT2E/SAP30BP/TAF7/ATG5/RTF1/UBE2N/CTR9/ING2/PHF1/RNF40/BCL6/NIPBL/CHTOP/SART3/NNMT/TWIST1/WBP2/CAMK1/CTBP1/CDK9/WDR5/KDM1A/KAT14/SETD5/PPP4C/OGT/PPP4R3B/SGF29/KAT2A/PHF20/NFYB/MBIP/APLNR/UBE2B/SET/WDR70/HCFC1/CAMK2D/MTF2/RAPGEF3/BRD4/PYGO2/HDAC5/IGF2/CTNNB1/SREBF1/ARID5A/RUVBL2/FMR1/SIRT1/SKI…
SC	GOBP_RESPONSE_TO_KETONE	189	0.405632	2.67105	0.0027027	0.00887008	AKR1C3/NR3C1/CAV1/SERPINF1/AKR1C2/MAOB/HNRNPD/GNG2/ASS1/NR1H3/TSPO/CDK4/RWDD1/A2M/NCOA4/GNB1/PARK7/NQO1/BAD/PCNA/CCND1/GLB1/AR/POSTN/HOXA10/TGFBR3/CALM3/TXNIP/ATP2B1/MSN/SLIT3/SFRP1/GOLPH3/PARP1/GAS6/AQP1/RPL27/WBP2/POR/LARP1/OXT/GBA/CYBA/CALR/DDIT4/BCL2L1/FOXO3/IGFBP7/THBS1/SMYD3/HSF1/UBE3A/YAP1/AVP/KLF2/PCK1/FDX1/ADAM15/PCK2/AKT1/ROCK2/KLF9/FIBIN/ADCY3/GPI/CSN1S1/CYP1B1/EFNA5/SPP1/ERRFI1/SREBF1…
SC	GOBP_POSITIVE_REGULATION_OF_CYTOSKELETON_ORGANIZATION	189	0.439853	2.89639	0.0027027	0.00887008	LIMCH1/ITGB1BP1/HAX1/BRK1/RHOA/WASF2/MAP1B/RAC1/PFN1/SNX9/DSTN/GSN/DRG1/RHOC/MAPRE1/S100A10/CFL2/RPS3/CYFIP1/DCTN1/FERMT2/BIN1/WDR1/PFDN2/ARL3/ARPC2/CDC42EP2/HRAS/PFN2/ARL2/CDC42EP4/ARF6/GRB2/CTTN/HSPA1A/SMAD3/SYNPO/CKAP5/PYCARD/SFRP1/SLAIN2/TESK1/MLST8/ABL1/CDK5/NRP1/MYOC/BAG4/LMOD1/WASF3/SORBS3/LPAR1/PPP1R35/WASL/CDC42EP1/ID1/HCLS1/PXN/SYNPO2/SWAP70/TGFBR1/RGCC/FES/PAK1/PLEK/CDK5RAP2/AKAP9/ROCK…
SC	GOBP_MITOCHONDRIAL_TRANSPORT	176	0.58701	3.84808	0.0027027	0.00887008	UBE2L3/PARL/PDCD5/VDAC2/STOML2/NDUFA13/BCAP31/HAX1/MFF/TIMM13/SH3GLB1/HSP90AA1/PINK1/UBE2D3/TOMM5/TIMM23/TOMM20/BOK/HSPD1/BNIP3L/MFN2/GRPEL1/FIS1/TOMM22/ACAA2/SLC25A5/HTRA2/TIMM9/AIP/DNAJC15/MUL1/TMEM14A/NOL3/VPS35/ALKBH7/TSPO/TOMM70/SLC25A20/DNAJC19/CHCHD4/SAE1/BAD/PAM16/TIMM22/UBE2J2/PITRM1/UBL5/ROMO1/PPIF/FBXO7/IMMP2L/TIMM8B/BCS1L/TIMM10/TOMM7/SLC25A4/HEBP2/TIMM10B/HSPA1A/TOMM34/LMAN1/HUWE1/SA…
SC	GOBP_SYNAPTIC_TRANSMISSION_GLUTAMATERGIC	93	-0.324229	-1.63888	0.00271003	0.00887008	CACNG8/GRIK2/DISC1/GRM7/GRM6/UNC13C/TNR/RELN/ALS2/UNC13A/CDH8/GRIK4/NTRK1/MAPK8IP2/OPHN1/GRM4/SERPINE2/GRM2/GRIK3/HTR2A/CLN3/GRM1/NLGN3/SYT1/KMO/DRD2/CACNG7/DRD3/OXTR/CLSTN3/CACNG2/CACNG3/NRXN1/CACNG5/SLC17A8/GRIK5/GRID1/GRM3/ROR2/GRM5/GRIK1/HTR1B/CACNG4/GRM8
SC	GOBP_RESPONSE_TO_STARVATION	190	0.406755	2.67458	0.0027248	0.00887008	AKR1C3/GNPAT/RRAGA/SH3GLB1/HSPA8/GABARAP/DAP/HSPA5/ATF4/DDIT3/DNAJC15/PFKFB1/GABARAPL2/XBP1/FOXO1/EIF2S1/RALB/NFE2L2/EIF2AK1/MAP1LC3B/GABARAPL1/UCP2/ACADM/ATG5/WDR45B/ADM/MTMR3/GLUL/SIK2/SFRP1/HNRNPA1/GAS6/RRAGD/STK24/ACAT1/SESN1/MAP1LC3A/INHBB/WIPI2/PRKAG1/OXCT1/LARP1/GBA/KLF10/FOXO3/GCN1/IFI16/LAMP2/ATG7/MAX/EIF2AK4/SESN2/RRAGB/SLC38A2/BCL2/PCK1/PDK4/COMT/KPTN/PCK2/SREBF2/NPRL2/GPT/WIPI1/SESN3/…
SC	GOBP_REGULATION_OF_PROTEIN_BINDING	191	0.421588	2.77431	0.0027248	0.00887008	TMBIM6/ANXA2/ITGB1BP1/HSP90AB1/CAV1/POLDIP2/FLOT1/SNAPIN/RAN/ACTB/PTPRF/PARK7/RACK1/RALB/MAPRE1/B2M/CRK/STUB1/FKBP1A/DERL1/PPP2CA/SPON1/CTNNBIP1/DAB2/ADD1/PPP1CA/RPL11/TGFBR3/CARD16/ADIPOQ/CLDN5/ABL1/DTNBP1/CAMK1/CDK5/LOX/LRP1/DHRS7B/NRP1/HIPK2/CTHRC1/ADRB2/KDM1A/TFIP11/BAMBI/ADNP/GTF2F1/RFNG/ID1/PLXND1/HSF1/ROCK1/LRPAP1/MFNG/PPP2CB/TCF7L2/IFIT2/LDOC1/PHLDA2/TGFBR1/APOE/DNAJB2/ADAM15/APP/PIN1/CSN…
SC	GOBP_REGULATION_OF_PROTEIN_POLYMERIZATION	191	0.487855	3.21039	0.0027248	0.00887008	VDAC2/HAX1/HSP90AA1/RDX/PINK1/MTPN/RHOA/MAP1B/ARPC1A/RAC1/PFN1/ARPC3/SNX9/MKKS/FLII/CAPZB/RANGRF/SPTBN1/GSN/DRG1/ARPC4/MAPRE1/TMSB4X/ARPC5L/RPS3/CYFIP1/DCTN1/BIN1/ARL3/ARPC2/CDC42EP2/ADD1/ARHGEF7/TWF2/PFN2/ARL2/ARHGAP18/EPS8/CDC42EP4/ARF6/CAPZA1/GRB2/CTTN/HSPA1A/CKAP5/PYCARD/SPTAN1/SLAIN2/DBN1/DMTN/MLST8/ABL1/RASA1/BBS4/TMSB10/BAG4/CAPG/LMOD1/CDH5/ESAM/KANK1/COTL1/TPPP3/CDC42EP1/TMOD1/KANK4/HCLS1…
SC	GOBP_RESPONSE_TO_MECHANICAL_STIMULUS	200	0.276048	1.83984	0.00273973	0.00887008	MTPN/TMEM120A/RHOA/MAP1B/MKKS/FYN/STAT1/GSN/BAD/NFKB1/CASP1/ACTG1/TGFBR2/MMP2/CXCL12/SLC1A3/TXNIP/MBD2/AQP1/MDK/CITED2/XPC/ENG/BAG3/MAPK14/BNIP3/ABHD12/HABP4/FADD/CYBA/TNFRSF1A/RELA/THBS1/PDE2A/PIEZO1/GADD45A/SLC38A2/ENDOG/NFKBIA/PKD2/PPL/COL1A1/JUND/JUP/BTG2/MAP3K2/GPI/MAP2K4/PLEC/CXCR4/BMP6/MYD88/BACE1/CTNNB1/ATP1A2/HTT/WNT11/PIK3CA/DAG1/EDN1/PTGER4/JUN/CXCL10/TLR4
SC	GOBP_B_CELL_MEDIATED_IMMUNITY	200	0.303561	2.02321	0.00273973	0.00887008	NDFIP1/CD81/HSPD1/C1S/SERPING1/CLU/HLA-DRA/HLA-DRB1/HLA-E/HLA-DMA/B2M/PARP3/HLA-DPA1/HLA-DPB1/C1QBP/C1R/CD74/TREX1/C1QA/C3/BCL6/HLA-DQB1/HMCES/NBN/C1QB/HLA-DMB/C1QC/NECTIN2/UNG/KMT5B/TRDC/TNFSF13/MLH1/HLA-DRB5/TRBC2/SWAP70/TRBC1/MAD2L2/ERCC1/FCER1G/THOC1/IRF7/HLA-DQA1/PTPN6/TCIRG1/IGKC/MYD88/TREM2/FCGR3A/IGLC3/IGLC2/STAT6/BCL3/BATF/IGLC1/IGHA1/PTPRC/EXOSC3/HLA-DQA2/C6/TFRC/C1RL/CD55/TP53BP1/IGLL5…
SC	GOBP_SISTER_CHROMATID_SEGREGATION	200	0.32765	2.18376	0.00273973	0.00887008	CHMP3/CDC16/PHB2/CHMP2A/BOD1/ANAPC11/RAN/PSMG2/DCTN2/VPS4A/PPP2R1A/TUBG2/NUDC/ATRX/NEK6/TOP2B/CHMP2B/RAB11A/NAA10/LCMT1/SMC3/KIF22/KPNB1/CDC26/CHMP1A/CHMP6/RAD21/NIPBL/IK/NAA50/BAZ1B/EML3/PINX1/CHMP5/SFPQ/CHMP4A/TUBG1/CHMP7/FEN1/HNRNPU/PDCD6IP/TPR/CHMP4B/CDC23/SMC2/EML4/CHTF8/BUB3/MAD2L2/FBXW7/CCNB1/PCID2/CDK5RAP2/WAPL/CUL3/DUSP1/SMC1A/ZW10/MAD2L1BP/RB1/KLHL22/CTNNB1/NUMA1/PTTG1/BECN1/SLF1/ANAPC1…
SC	GOBP_CELLULAR_RESPONSE_TO_STEROID_HORMONE_STIMULUS	200	0.422544	2.81623	0.00273973	0.00887008	UBE2L3/AKR1C3/NR3C1/PHB2/PHB/HSPA8/SERPINF1/PTGES3/RHOA/PLPP1/PMEPA1/RAN/UFSP2/ASS1/PGRMC2/PRMT2/RBFOX2/DDX5/DDRGK1/RWDD1/ANXA1/NCOA4/YWHAH/CRY2/PARK7/DAXX/RHOXF1/DDX17/UBA5/TAF7/RXRB/DAB2/AR/EGLN2/URI1/ATP2B1/HSPA1A/SFRP1/PARP1/AQP1/WBP2/UFL1/ZFP36L1/REST/GPER1/ZFP36L2/ZMIZ1/CALR/DDIT4/SAFB/KDM1A/FOXO3/CLOCK/HNRNPU/DDX54/CALCOCO1/SMYD3/UBE3A/YAP1/PCK1/PAGR1/PAK1/PCK2/LMO3/BMP4/FKBP4/RXRA/ZBTB7A/…
SC	GOBP_RESPIRATORY_SYSTEM_DEVELOPMENT	201	0.288228	1.91702	0.00277008	0.00887008	RBPJ/GPC3/PTGES3/ASS1/NFIB/COL3A1/RBP4/HIKESHI/EPAS1/RIDA/TGFBR2/PPP1CA/CEBPA/BAG6/MAN1A2/STK40/MSC/ADAMTS2/AIMP2/LTA4H/YWHAZ/PDGFRB/SAV1/IGFBP5/LOX/SRSF6/RCN3/CTSH/EXT1/ADA/AP3B1/THRB/SPRY1/SIX1/HOXA5/MME/FGF1/PKDCC/YAP1/HEG1/LIPA/THRA/KLF2/TULP3/FBXW7/BMP4/MAP2K1/SPRY2/ALDH1A3/SEC24B/HES1/NOTCH1/ERRFI1/KDR/CTNNB1/BASP1/WNT11/SREBF1/DAG1/SKI/LTBP3/CDC42/FGF7/ASXL1/FGFRL1/MAN2A1/SRF/NKIRAS1/PDGFR…
SC	GOBP_MONONUCLEAR_CELL_MIGRATION	194	0.350039	2.31088	0.00277008	0.00887008	HMGB1/RARRES2/CD99/RHOA/CREB3/XG/CD99L2/ANXA1/CKLF/APOD/RPS19/CRK/C1QBP/AIF1/FOLR2/EPS8/CXCL12/MSN/LGALS3/PECAM1/PYCARD/GAS6/OXSR1/MDK/ECM1/NBL1/CSF1R/C3AR1/SAA1/SIRPA/WNK1/FADD/GBA/CCL13/CALR/EXT1/THBS1/WASL/CCL14/PDGFD/TNFRSF14/STK39/AKIRIN1/CTSG/S1PR1/APP/GPR183/CCL18/CRKL/AKT1/DUSP1/CSF1/PLEC/CXCR4/HSD3B7/CCL3/CCL4/CMKLR1/SLAMF8/CD47/CCL19/CD200/CXCL10/CDC42/SLIT2/ANO6/CCR1/LGALS9/CCL2/PDGFB/…
SC	GOBP_POSITIVE_REGULATION_OF_EPITHELIAL_CELL_PROLIFERATION	201	0.349458	2.32427	0.00277008	0.00887008	RTN4/LAMC1/HMGB1/HTRA1/NME2/VEGFB/STAT5A/ANG/CAV2/XBP1/MYDGF/BAD/NME1/CCND1/IGF1/AR/HRAS/GRN/FGFR1/CXCL12/MAP2K5/GLUL/SFRP1/TWIST1/MDK/ECM1/PDCL3/LAMB1/EGFR/PDCD6/WDR48/OSR2/SRSF6/NRP1/ZNF580/EGFL7/TNFSF12/CYBA/THBS4/GPBAR1/AGGF1/HMGB2/SP1/FGF1/ID1/YAP1/TCF7L2/TGFBR1/APLNR/VEGFD/BMP4/AKT1/B4GALT1/ACVRL1/BMP6/TEK/NOTCH1/KDR/IGF2/CTNNB1/BMP2/STAT3/ZNF703/STOX1/JUN/NRP2/SIRT1/HMOX1/CDC42/FGF7/VEGFC/…
SC	GOBP_ACTOMYOSIN_STRUCTURE_ORGANIZATION	194	0.37886	2.50115	0.00277008	0.00887008	ITGB5/LIMCH1/ITGB1BP1/ITGB1/RHOA/WASF2/RAC1/PFN1/MKKS/FLII/PDLIM1/VPS4A/MYH10/RHOC/PDCD10/S100A10/CFL2/INPP5K/FAM171A1/MYL9/SORBS1/MYH9/FERMT2/WDR1/ACTG1/CNN3/PFN2/SMAD3/SFRP1/PDGFRB/TESK1/DLC1/ABL1/PRKAR1A/BBS4/TJP1/NRP1/ZYX/MYOC/BAG4/EPB41L1/EPB41L4B/LMOD1/EPB41L3/SORBS3/LPAR1/PDCD6IP/TNFAIP1/ROCK1/TMOD1/TNNT3/PXN/PPFIA1/CDC42BPB/TGFBR1/RGCC/S1PR1/MEF2A/CDC42BPA/PAK1/PIK3R1/CUL3/CSRP1/ROCK2/EPB…
SC	GOBP_CHROMATIN_REMODELING	195	0.382019	2.53316	0.00277008	0.00887008	NUDT5/ANP32B/YY1/PAF1/NAP1L4/PIH1D1/MCRS1/ACTB/HNRNPC/ATRX/DAXX/NPM1/CENPW/KDM5A/SMARCA2/CFDP1/TFPT/POLE3/UCHL5/TOP1/MIS18A/DNAJC9/VPS72/MBD2/SART3/BAZ1A/SMARCA1/ASF1A/BRD3/ZNHIT1/RSF1/BAZ1B/SMARCD2/NAP1L1/ACTR8/RERE/SMARCE1/ANP32E/DMAP1/MIER1/SSRP1/HMGB2/KAT2A/SMYD3/MPND/TSPYL1/MLLT1/SMARCC1/SCMH1/PAK1/BRD2/ZBTB7A/SATB1/BPTF/SET/ITGB3BP/TSPYL4/NAP1L5/HCFC1/YEATS4/CHD1L/TSPYL2/HCFC2/SMARCD3/BRD4/…
SC	GOBP_GLUCOSE_METABOLIC_PROCESS	194	0.434161	2.86624	0.00277008	0.00887008	SERP1/ENO1/GPD1/PGK1/PDHA1/PGM1/TPI1/ATF4/RANBP2/DCXR/PFKFB1/SLC25A1/RBP4/BCKDK/LEP/DGAT2/FOXO1/APOD/BAD/PDK2/INPP5K/SORBS1/LCMT1/GAPDH/IGF1/FABP5/TSTD1/ACADM/PC/PPP1CA/ADIPOR1/IGFBP4/ARPP19/SDHAF3/FAM3C/NNMT/ADIPOQ/POMC/MAPK14/NPY1R/PPP1CB/PGP/DUSP12/USP7/WDR5/HK1/SLC25A10/GAA/OGT/PPP4R3B/CLK2/KAT2A/SESN2/PHLDA2/PCK1/PDK4/PFKL/SLC25A13/PCK2/FBP1/PGAM2/LRP5/AKT1/GPT/C1QTNF1/BRAT1/INSR/GPI/EPM2AIP…
SC	GOBP_REGULATION_OF_MYELOID_CELL_DIFFERENTIATION	193	0.444633	2.93219	0.00277008	0.00887008	CIB1/NDFIP1/MTURN/HAX1/SMAP1/EIF6/PITHD1/PAF1/WDR61/RBFOX2/STAT1/HOXA7/TFE3/HLA-DRB1/B2M/MAFB/CTNNBIP1/FSTL3/CD74/FAM210B/TCTA/MITF/CTR9/FBN1/HSPA1A/SFRP1/ADIPOQ/ZFP36L1/RAB7B/MAPK14/LOX/FADD/C1QC/ISG15/TYROBP/KLF10/FOXO3/TOB2/PRKDC/HMGB2/HOXA5/HSF1/STAT5B/GPR137B/HCLS1/NFKBIA/ZBTB16/CEBPB/CD4/FES/FBXW7/PIK3R1/ID2/IRF7/TMEM178A/MEF2C/RIPK1/TRIB1/CSF1/PRMT1/TMEM64/ESRRA/HSPA9/CCL3/RB1/EVI2B/LDB1/T…
SC	GOBP_REGULATION_OF_ENDOTHELIAL_CELL_MIGRATION	195	0.449405	2.97999	0.00277008	0.00887008	CIB1/SPARC/ITGB1BP1/HMGB1/ATP2B4/CSNK2B/SERPINF1/RHOA/RAC1/STAT5A/ANXA1/HSPB1/SVBP/PDCD10/NFE2L2/SRPX2/TMSB4X/SASH1/MMRN2/GRN/FGFR1/DCN/MAP2K5/GLUL/PTPRM/AAMP/RRAS/PLPP3/PRCP/MAPK14/ABL1/PDCD6/EFNA1/NRP1/PPARG/ZNF580/NR2F2/CALR/THBS1/HDAC7/SP1/FGF1/GADD45A/MAP3K3/PLK2/RHOB/RGCC/APOE/FBXW7/JUP/BMP4/ANGPT1/AKT1/MEF2C/ROCK2/MEOX2/SMOC2/GPI/RIN2/STARD13/SCARB1/ACVRL1/TEK/NOTCH1/ATOH8/HDAC5/KDR/MAP2K3…
SC	GOBP_RNA_LOCALIZATION	193	0.463658	3.05765	0.00277008	0.00887008	CETN2/CCT5/TCP1/YBX1/RFTN1/MRPL18/TST/CCT7/TOMM20/CCT8/CCT6A/CCT4/YY1/NCBP2/FLOT1/SLBP/THOC7/RANBP2/PRPF31/RAN/PRPF6/MYO1C/SSB/PIH1D1/IWS1/SEC13/SRSF3/NHP2/NPM1/NOP58/SRSF7/NUTF2/NOP10/RBM15B/SARNP/UPF3B/KPNB1/HNRNPAB/ALKBH5/TGFBR2/DDX19B/NXT1/YTHDC1/PABPN1/POLDIP3/KHDRBS1/CCT3/UPF2/DDX39B/CKAP5/HNRNPA1/CHTOP/RAE1/CASC3/AGFG1/NUP214/ZFP36L1/DDX39A/ZC3H11A/SMG7/DKC1/SRSF1/UPF3A/ENY2/SMG5/AAAS/DHX9…
SC	GOBP_HORMONE_METABOLIC_PROCESS	229	0.236853	1.61518	0.00277778	0.00887008	ALDH9A1/AKR1C3/DHRS3/AKR1C2/HSD17B10/ADH1B/TSPO/AKR1C1/RBP4/RDH5/LEP/DGAT1/DGAT2/DHRS4/ALDH1A1/CPQ/PNPLA2/STUB1/HSD17B8/NFKB1/SLC16A2/DAB2/EDNRB/CTSK/RETSAT/HSD17B11/ADM/ADH1C/CPE/ATP6AP2/DHCR7/POR/REST/CTSB/YIPF5/PNPLA4/PAPSS2/PTPN11/CTSL/ADH1A/LIPE/DHRS7/FURIN/STAT5B/TCF7L2/RDH11/BACE2/CMA1/ECE1/CTSG/FDX1/RDH14/CRABP2/CPA3/STARD3/ALDH1A3/DHRS11/BMP6/CYP1B1/ATP1A1/SRD5A3/SPP1/HSD17B4/SCPEP1/BMP2…
SC	GOBP_LYMPHOCYTE_ACTIVATION_INVOLVED_IN_IMMUNE_RESPONSE	197	0.269881	1.78868	0.00277778	0.00887008	NDFIP1/HMGB1/CD81/LGALS1/HSPD1/ANXA1/HLA-DRA/XBP1/RPS6/HLA-DRB1/PARP3/APBB1IP/ITM2A/DOCK11/CD74/LGALS3/VAMP7/BCL6/HMCES/NBN/MDK/ABL1/HLA-DMB/UNG/KMT5B/FGL2/HLA-F/ADA/EIF2AK4/TNFSF13/LCP1/MFNG/MLH1/LAMP1/SWAP70/PCK1/NKG7/CORO1A/MAD2L2/IRF8/ERCC1/GPR183/FCER1G/THOC1/RIPK2/PLCL2/ST3GAL1/VAMP2/MTOR/STAT6/STAT3/CCL19/PTGER4/CD86/ITFG2/RC3H1/BCL3/TLR4/BATF/PTPRC/CD1C/EXOSC3/LGALS9/HLX/ZBTB7B/NOTCH2/TFR…
SC	GOBP_REGULATION_OF_HORMONE_SECRETION	229	0.263938	1.79988	0.00277778	0.00887008	SERP1/VAMP3/JAGN1/NDUFAF2/PPP3CB/GLUD1/ADRA2A/SRI/SNX6/RBP4/ANXA1/MPC2/LEP/HMGN3/CRY2/NMB/BAD/HLA-DRB1/UQCC2/CDK16/HCAR2/DAB2/UCP2/VAMP8/AIMP1/GLUL/NNAT/VAMP7/ICA1/SFRP1/PIM3/ADIPOQ/POMC/SOX4/REST/GPER1/HADH/INHBB/OXCT1/PTPN11/PPARG/CRHBP/CLOCK/RAB8B/TCF7L2/PPP3CA/PFKL/PCK2/ACVR1C/LRP5/OSBP/KLF7/C1QTNF1/ACSL4/TCIRG1/FKBP1B/SNX4/BMP6/EFNA5/SPP1/STX4/VAMP2/SREBF1/IRS2/NR1D1/EDN1/LRRC8A/CRY1/AGT/GJA…
SC	GOBP_REGULATION_OF_STRESS_ACTIVATED_PROTEIN_KINASE_SIGNALING_CASCADE	197	0.321996	2.13408	0.00277778	0.00887008	HMGB1/MTURN/PINK1/PRDX1/ZNF622/ARL6IP5/GSTP1/IGBP1/LEP/FOXO1/PDCD10/RNF13/PPIA/AIDA/DNAJA1/GPS2/SASH1/HRAS/KLHDC10/TGFBR3/MDFIC/DIXDC1/SDCBP/MAP4K4/PYCARD/SFRP1/IGFBP6/ZMYND11/HDAC3/EGFR/STK25/SIRPA/MID1/HIPK2/SFRP2/GADD45A/MAP3K3/PAFAH1B1/PJA2/EZR/STK39/RB1CC1/TAOK3/MBIP/KLHL31/APP/DUSP22/BMP4/MAP2K1/PDCD4/DUSP1/RIPK1/RIPK2/PER1/PRMT1/GADD45G/RELL1/RAP2A/HIPK3/MYD88/TREM2/BMP2/MAP2K2/CCL19/TLR4/…
SC	GOBP_FAT_CELL_DIFFERENTIATION	229	0.443588	3.02498	0.00277778	0.00887008	GPX1/RARRES2/TMEM120A/ADIRF/LPL/MKKS/CREBL2/DDIT3/FABP4/LEP/CBY1/XBP1/FOXO1/TFE3/PSMB8/CCDC3/LGALS12/CCND1/FERMT2/MAFB/INSIG1/LAMB3/GPS2/BSCL2/METRNL/PID1/ARL4A/ARID5B/CEBPA/SDF4/SORT1/FAM120B/SMAD3/CCDC85B/SFRP1/NIPBL/OSBPL8/PIAS1/ADIPOQ/ZFP36L1/SAV1/MAPK14/BNIP3/GPER1/ZFP36L2/BBS4/INHBB/DHRS7B/CTBP1/PPARG/ADRB2/PEX11A/WWTR1/ADGRF5/TRIB2/MEDAG/NUDT7/HNRNPU/BBS7/CEBPD/SIX1/SFRP2/YAP1/TCF7L2/ZBTB1…
SC	GOBP_RIBONUCLEOPROTEIN_COMPLEX_SUBUNIT_ORGANIZATION	197	0.600709	3.9813	0.00277778	0.00887008	VCP/DDX1/SNU13/KIF5B/XRCC5/HSP90AB1/EIF2S2/STRAP/EIF3A/HSP90AA1/EIF6/PTGES3/SNRPC/RPL3/MRPL20/EIF4H/SRPK2/PRPF31/SNRPD2/RPLP0/RPL6/PRPF6/SNRPG/SNRPE/SF1/NOL3/CELF2/CLNS1A/PIH1D1/LSM4/SNRPB/EIF4B/LUC7L3/RPS19/TAF9/RPS5/LSM2/DHX29/SLU7/PUF60/CD2BP2/EIF5/PRKRA/RPSA/SF3B1/ERAL1/SRSF9/GEMIN8/RPS15/CELF1/RPL10/RPL13A/YTHDC1/RPL11/DDX28/SF3A1/PRPF18/SRSF10/RPL5/AAR2/DDX39B/ABT1/SF3A3/SART3/PRMT5/MRPS11/…
SC	GOBP_ALPHA_AMINO_ACID_METABOLIC_PROCESS	196	0.250945	1.66219	0.00278552	0.00887008	ATP2B4/TST/GLYAT/FAH/CDO1/HSD17B10/QDPR/MTHFS/DDAH2/SEPHS2/ATF4/GLUD1/ODC1/ASS1/KYAT3/PARK7/PCBD1/ADHFE1/ALDH4A1/FPGS/RIDA/SERINC3/GCSH/GLUL/THAP4/ADI1/NAT8L/SRR/HIBCH/ENOPH1/ALDH18A1/ACAT1/AASDHPPT/MSRA/SEPHS1/ILVBL/ASNSD1/BHMT2/NIT2/GOT1/SMS/SHMT2/ICMT/GCDH/PLOD2/AUH/SDSL/AZIN1/SLC25A13/HMGCL/HIBADH/GPT/PHGDH/OAT/DDAH1/SHMT1/HAAO/GFPT2/SLC25A12/GLS/TTC36/ARG2/BLMH/GCAT/RIMKLB/THNSL2/MTHFD1
SC	GOBP_MORPHOGENESIS_OF_A_BRANCHING_STRUCTURE	198	0.265995	1.76576	0.00278552	0.00887008	RTN4/PHB2/GPC3/HOXB7/ILK/CLIC4/COL4A1/CTNNBIP1/AR/TGFBR2/PPP1CA/ADM/GRB2/SFRP1/MDK/RSPO3/ENG/ABL1/RERE/NRP1/CTSH/FKBPL/EXT1/SPRY1/SEMA3C/SIX1/SFRP2/HOXA5/FGF1/PLXND1/YAP1/BCL2/RASIP1/TMED2/PKD2/GNA13/FZD5/PAK1/BMP4/LRP5/SPRY2/EDNRA/CSF1/MKS1/FEM1B/NOTCH1/KDR/CTNNB1/BMP2/DAG1/EDN1/FGF7/SLIT2/SETD2/SNAI2/AGT/BTRC/ACVR1/SRF/SULF1/MYC/DDR1/SIRT6/AREG/FGF10/LGR4/FGF2/NTN4/SOCS3/NOTCH4
SC	GOBP_CELL_CELL_JUNCTION_ORGANIZATION	202	0.284258	1.88915	0.00278552	0.00887008	CTNNA1/GNPAT/CAV1/RDX/RHOA/MYO1C/TLN2/RHOC/ACTB/FERMT2/WDR1/ACTG1/ADD1/VCL/ARL2/RAMP2/PERP/SMAD3/PECAM1/TLN1/PARD3/CLDN5/CSF1R/PKP4/GJA4/TJP1/CDH5/ESAM/EPB41L3/RAB13/EXT1/LIMS2/SVEP1/GPBAR1/FLNA/PDCD6IP/CD9/HDAC7/ROCK1/OCEL1/HEG1/TGFBR1/APLNR/JAM3/FZD5/CCM2/JUP/CTNND1/PARD6A/ROCK2/HIPK1/PLEC/BMP6/PRKACA/AFDN/MPDZ/CTNNB1/PTPN23/WNT11/STRN/EFNB2/CSK/ZNF703/GJA5/PKN2/MYADM/CDC42/TBCD/SNAI2/AGT/SRF/G…
SC	GOBP_POSITIVE_REGULATION_OF_TRANSMEMBRANE_TRANSPORT	204	0.286147	1.90485	0.00278552	0.00887008	ITGB1/PINK1/GPC3/CALM1/RHOQ/ACSL1/SRI/IFNGR2/CREBL2/SUMO1/ATP1B3/CALM2/NFE2L2/KCNIP2/SORBS1/NDUFA4/TMSB4X/GSTO1/IGF1/ARPP19/CALM3/C3/SLC9A3R1/OSBPL8/GLRX/FXYD1/ADIPOQ/THY1/MAPK14/ABL1/GPER1/STIM1/CDK5/ARL6IP1/WNK1/ACTN4/PTPN11/ADRB2/FLNA/COX17/RAMP3/STK39/GSTM2/APLNR/PKD2/VMP1/AZIN1/TRDN/MEF2A/ACSL5/PIK3R1/CACNA2D1/AKT1/AKAP9/EDNRA/TCAF1/CLIP3/INSR/CHP1/TREM2/HTT/IRS2/EDN1/RGN/CXCL10/ANO6/AGT/CCL…
SC	GOBP_MEMBRANE_LIPID_METABOLIC_PROCESS	204	0.286863	1.90962	0.00278552	0.00887008	PLPP1/MGST2/ORMDL1/HTRA2/ORMDL2/PSAP/SCCPDH/PPT1/VAPA/DPM3/PPP2R1A/ASAH1/ELOVL1/SMPD1/PEMT/ENPP2/GLB1/GPAA1/ELOVL5/PPP2CA/SERINC3/FUCA1/PIGF/PIGC/PIGZ/DPM2/ORMDL3/TECR/HEXB/NSMAF/PLPP3/PIGU/NAGA/GLA/DPM1/SERINC1/ST6GALNAC6/TM9SF2/FADS3/PIGV/B3GALT4/GBA/B4GALT3/SUMF1/SMPD2/PIGK/CERS2/PIGS/HEXA/GM2A/KDSR/OSBP/SGPP1/SGMS1/ELOVL3/CSNK1G2/PGAP2/ST3GAL1/ARV1/CYP1B1/CPTP/NEU1/PGAP3/SIRT3/ST6GALNAC4/GBA2…
SC	GOBP_NEGATIVE_REGULATION_OF_NEURON_DEATH	204	0.367921	2.44921	0.00278552	0.00887008	SOD1/HSP90AB1/WFS1/PINK1/SERPINF1/NTRK2/BOK/RHOA/ATF4/HTRA2/SNX6/PPT1/GBE1/VPS35/PSMC1/PARK7/HDGF/RACK1/NENF/FBXO7/NRBP2/HRAS/GRN/EIF4G1/NONO/TMEM259/MDK/DNAJC5/REST/DTNBP1/RASA1/CDK5/NRP1/HIPK2/GBA/STAMBP/CHMP4A/SULT1A4/BCL2L1/CD34/HLA-F/GPNMB/ADNP/CNTFR/SIX1/AP2B1/HSF1/ROCK1/CHMP4B/BCL2/CEBPB/OXR1/AXL/IL6ST/APOE/CORO1A/STXBP1/PARP2/GFER/ANGPT1/PCDHGC3/AKT1/BTBD10/MEF2C/BTG2/SET/CSF1/GPI/MAP2K4/…
SC	GOBP_REGULATION_OF_CHROMOSOME_ORGANIZATION	204	0.368431	2.4526	0.00278552	0.00887008	CDC16/CCT5/TCP1/XRCC5/CCT7/CCT8/CCT6A/CCT4/YY1/HNRNPD/ANAPC11/PSMG2/TERF2IP/MCRS1/HNRNPC/ATRX/NEK6/NAA10/LCMT1/TEN1/GNL3/TFPT/CDC26/TRIM28/UCHL5/CCT3/RAD21/MPHOSPH8/MNAT1/PARP1/HNRNPA1/IK/NBN/SSBP1/BAZ1B/ACTR8/PINX1/DKC1/SFPQ/USP7/SMG5/XRCC1/FEN1/HNRNPU/CCT2/TPR/CDC23/SMC2/BUB3/NABP2/MAD2L2/HNRNPA2B1/CCNB1/ERCC1/PCID2/UPF1/ACD/CDK5RAP2/WAPL/CUL3/DUSP1/PNKP/RAD50/SETMAR/TNKS2/ZW10/ACTL6A/MAD2L1BP/…
SC	GOBP_CARBOHYDRATE_BIOSYNTHETIC_PROCESS	204	0.375189	2.4976	0.00278552	0.00887008	UGP2/GYG2/PGD/GPD1/PGK1/PTGES3/PGM1/TPI1/ATF4/RANBP2/GBE1/PFKFB1/SLC25A1/RBP4/LEP/B4GAT1/DGAT2/FOXO1/PDK2/INPP5K/SORBS1/NFKB1/IGF1/CLTC/ACADM/PC/PPP1CA/ARPP19/SDHAF3/FAM3C/NNMT/ADIPOQ/GPER1/PPP1CB/ST6GALNAC6/PGP/B3GALT4/USP7/WDR5/SLC25A10/EXT1/GOT1/OGT/PPP4R3B/CLK2/KAT2A/AKR1A1/SESN2/GYS1/AGL/PCK1/MPDU1/SLC25A13/PCK2/FBP1/PGAM2/PLEK/AKT1/GPT/ISYNA1/INSR/B4GALT1/GPI/B3GNT2/EPM2AIP1/IGF2/GYG1/PTH1R…
SC	GOBP_PROTEIN_KINASE_B_SIGNALING	196	0.381575	2.52746	0.00278552	0.00887008	CIB1/RTN4/AKR1C3/GPX1/ITGB1BP1/ITGB1/HSP90AB1/HAX1/PHB/HSP90AA1/PINK1/NTRK2/AKR1C2/DDIT3/ILK/MUL1/LEP/PARK7/MYDGF/RACK1/CPNE1/MTDH/TXN/INPP5K/PHLDA3/FERMT2/C1QBP/PPP2CA/IGF1/FGFR1/SLC9A3R1/GAS6/PTEN/OSBPL8/MKRN2/RRAS/ENG/ZFP36L1/IGFBP5/EGFR/PDCD6/GPER1/H19/LOX/MYOC/BAG4/RCN3/SETX/HYAL2/MAZ/THBS1/SESN2/TCF7L2/RAMP3/HCLS1/BANK1/AXL/TGFBR1/SH2B3/F10/ANGPT1/SPRY2/AKT1/C1QTNF1/INSR/SESN3/LEMD2/CCL3/TE…
SC	GOBP_TRANSFORMING_GROWTH_FACTOR_BETA_RECEPTOR_SIGNALING_PATHWAY	198	0.426567	2.83169	0.00278552	0.00887008	ITGB5/ITGB1/HSP90AB1/HTRA1/STRAP/CAV1/FMOD/CDKN1C/SNW1/PMEPA1/HSPA5/CDKN2B/SNX6/COL3A1/USP9X/CAV2/STUB1/FERMT2/FKBP1A/COL1A2/DAB2/TGFBR2/TGFBR3/ING2/CIDEA/FBN1/SDCBP/HSPA1A/SMAD3/PARP1/C20orf27/TRIM33/LATS2/CITED2/ENG/GLG1/CLDN5/FAM89B/HTRA3/LOX/ZYX/PPARG/HIPK2/CDH5/MAP3K7/ZMIZ1/LRRC32/PPM1A/GIPC1/BAMBI/THBS1/SPRY1/ID1/LTBP2/FURIN/PXN/TGFBR1/ZEB1/PIN1/DUSP22/ZBTB7A/SPRY2/LTBP4/SMURF1/ACVRL1/VASN/…
SC	GOBP_PROTEIN_FOLDING	198	0.580023	3.85039	0.00278552	0.00887008	PEX19/PFDN1/CCT5/PPIG/HSP90B1/TCP1/PDCD5/TTC1/HSP90AB1/WFS1/ST13/SIL1/HSP90AA1/HSPA8/CCT7/WDR83OS/DNAJB12/CCT8/CCT6A/CCT4/PTGES3/HSPD1/GRPEL1/HSPA5/PFDN5/PPIH/PRDX4/RANBP2/PDIA6/CRYAB/CLU/AIP/MKKS/CWC27/P4HB/CRTAP/ERP44/FKBP2/VAPA/PDIA3/DNAJB1/HSPB1/DNAJC19/NUDC/CHCHD4/DNAJC1/LMAN2L/PPIA/B2M/TXNDC9/PPIC/CDC37L1/FKBP1A/SDF2/DNAJB11/PFDN2/DNAJA1/PPIF/VBP1/HSPBP1/TBCA/PDIA4/PPIB/CD74/GRN/ARL2/CCT3/H…
SC	GOBP_CIRCADIAN_RHYTHM	203	0.306438	2.03699	0.0027933	0.00887008	NTRK2/IMPDH2/HNRNPD/ATF4/ASS1/NR1H3/THRAP3/USP9X/LEP/CRY2/MYCBP2/HEBP1/KDM5A/NR2F6/PPP1CA/TOP1/NONO/RBM4/HUWE1/PTEN/HDAC3/PRMT5/ADIPOQ/BHLHE41/ID3/PPP1CB/SIAH2/PPARG/SFPQ/SETX/PSPC1/NAGLU/USP7/KLF10/CLOCK/TARDBP/ATG7/HNRNPU/OGT/PRKDC/NRIP1/ID1/PTGDS/GNAQ/UBE3A/ID4/PER3/PPP1CC/FBXW7/JUND/ID2/CSNK1E/NFIL3/ROCK2/KLF9/PER1/FBXW11/NR1D2/RBM4B/MTOR/SREBF1/FBXL3/NR1D1/GNA11/NCOA2/SIRT1/CRY1/NUDT12/FBXL6…
SC	GOBP_CALCIUM_MEDIATED_SIGNALING	199	0.273173	1.81308	0.00280899	0.00887008	CIB1/ATP2B4/BCAP31/HINT1/CALM1/FIS1/PPP3CB/PDK2/TMBIM4/CAMTA1/CALM2/GSTO1/PPP3CC/IGF1/EDNRB/CALM3/POMC/DMTN/PTBP1/EGFR/SULT1A4/LMCD1/ADA/GSTM2/CCRL2/CD4/PPP3CA/PLEK/NFATC3/DEFB1/GBP1/RCAN2/PRNP/CAMK2D/BST1/FKBP1B/CHP1/CXCR4/CCR10/CCL3/PRKACA/CCL4/CMKLR1/KDR/HOMER3/TREM2/SELP/TMEM100/ATP1A2/MTOR/HTT/EDN1/RGN/ADGRL1/ACKR4/VCAM1/NFATC1/PPP1R9A/NFATC2/P2RY12/PTPRC/CCR1/SGCD/CAMKK2/DYRK2/PTGFR/SYK/ANK…
SC	GOBP_REGULATION_OF_CELL_JUNCTION_ASSEMBLY	199	0.296234	1.96613	0.00280899	0.00887008	LIMCH1/ITGB1BP1/CAV1/POLDIP2/PTPRA/NTRK2/CORO1C/RHOA/FLOT1/RAC1/MYO1C/VPS35/APOD/S100A10/SRPX2/FERMT2/ACTG1/VCL/EIF4G1/ARF6/SMAD3/MAP4K4/SFRP1/PTEN/SLK/THY1/CLDN5/DMTN/DLC1/ABL1/TJP1/NRP1/MYOC/OXT/SETD5/GPBAR1/THBS1/ADNP/AMIGO2/SIX1/ROCK1/APLNR/FZD5/RAPGEF1/APP/DUSP22/GPC6/MEF2C/ROCK2/GPM6B/LRRN3/THBS2/CLSTN2/MACF1/GPC4/ACVRL1/RAP1A/ABI3/PRKACA/EFNA5/FAM107A/TEK/KDR/LDB1/DAPK3/TPBG/CLSTN1/PHLDB2/…
SC	GOBP_T_CELL_PROLIFERATION	199	0.298228	1.97937	0.00280899	0.00887008	NDFIP1/HMGB1/CD81/PSMB10/PPP3CB/FYN/PRDX2/ANXA1/LEP/RPS6/HLA-DRB1/HLA-E/GPAM/HLA-DPA1/HLA-A/HLA-DPB1/RPS3/AIF1/IGF1/TGFBR2/EFNB1/MSN/LGALS3/DHPS/CCND3/PYCARD/VSIG4/NCSTN/ABL1/PRKAR1A/HLA-DMB/FADD/LRRC32/GPNMB/SOS1/TNFRSF14/STAT5B/TNFSF13B/CEBPB/IL6ST/CORO1A/BMP4/TNFRSF4/TNFRSF21/NCK1/CD151/RIPK2/PTPN6/PRNP/FKBP1B/PELI1/RAC2/HES1/IGF2/TNFRSF1B/CTNNB1/CD276/CCL19/CD86/RC3H1/CASP3/VCAM1/ARG2/CBLB/SD…
SC	GOBP_DEVELOPMENT_OF_PRIMARY_SEXUAL_CHARACTERISTICS	228	0.306906	2.089	0.00280899	0.00887008	CTNNA1/SOD1/AKR1C3/EIF2S2/UBB/MEA1/CSDE1/BOK/FZD4/HSPA5/PRDX4/MKKS/SF1/A2M/NCOA4/ANG/LEP/ATRX/ARID4A/RHOBTB3/CCND1/TFPT/NUPR1/IMMP2L/AR/HOXA10/MMP2/ARID5B/ING2/ZNF830/IDH1/SLIT3/SFRP1/EIF2B5/CITED2/PDGFRB/FST/WDR48/INHBB/NR2F2/NUDT1/YBX3/RAB13/BCL2L1/FOXO3/SFRP2/HMGB2/NRIP1/RNF38/STAT5B/UBE3A/BCL2/CEBPB/TGFBR1/ADAM15/ERCC1/CRKL/EIF2B2/MMP19/INSR/EIF2B4/CYP1B1/HSD17B4/KDR/BASP1/TNFAIP6/FNDC3A/ACVR…
SC	GOBP_SPINDLE_ORGANIZATION	199	0.328879	2.1828	0.00280899	0.00887008	VCP/CHMP3/POLDIP2/CHMP2A/TUBB/RHOA/BCCIP/RAN/DCTN2/DRG1/PPP2R1A/TUBG2/MAP4/NUDC/ATRX/NEK6/MAPRE1/CHMP2B/PARP3/RAB11A/RPS3/MYH9/DCTN1/SMC3/CCDC69/KPNB1/CLTC/OFD1/CHMP1A/TACC1/CHMP6/HSPA1A/CKAP5/LZTS2/RAE1/HDAC3/SBDS/HAUS4/NTMT1/LSM14A/EML3/CHMP5/SAC3D1/CHMP4A/DCTN6/TUBG1/AAAS/CHMP7/FLNA/KIF3B/HNRNPU/PDCD6IP/SUN2/KIZ/TPR/CHMP4B/MLH1/EZR/PLK2/HAUS7/CCNB1/MAP9/UVRAG/SMC1A/CEP63/HAUS1/NEK7/NUMA1/MAPRE…
SC	GOBP_CELL_MATRIX_ADHESION	228	0.383852	2.61274	0.00280899	0.00887008	CIB1/ITGB5/LIMCH1/ITGB1BP1/CD36/ITGB1/POLDIP2/PTPRA/CORO1C/RHOA/RAC1/FBLN5/CD63/COL3A1/ILK/EFEMP2/TRIP6/HOXA7/APOD/S100A10/SORBS1/FERMT2/ITGA7/ACTN1/CD44/ACTG1/ITGAE/ARHGEF7/ADAMTS12/VCL/RHOD/EPDR1/CTTN/TIMM10B/SMAD3/MAP4K4/SFRP1/BCL6/PTEN/RRAS/SLK/ECM2/THY1/LYVE1/DMTN/DLC1/ABL1/RASA1/CDK5/NRP1/ZYX/MYOC/NID1/CD34/THBS1/ITGAV/UTRN/TNXB/ROCK1/FN1/BCL2/PXN/PPFIA1/ITGA6/JAM3/ADAM15/PIK3R1/ITGA5/JUP/D…
SC	GOBP_CELLULAR_RESPONSE_TO_INSULIN_STIMULUS	199	0.458802	3.04511	0.00280899	0.00887008	RARRES2/PTPRA/RAB10/LPL/RHOQ/AP3S1/STAT1/MYO1C/CDK4/PHIP/YWHAG/CAV2/ZNF106/LEP/XBP1/FOXO1/PDK2/APRT/INPP5K/SORBS1/CYFIP1/INSIG1/EIF4EBP2/RAB31/UCP2/DENND4C/ADIPOR1/PID1/GRB2/USO1/NUCKS1/SIK2/ATP2B1/CCND3/PARP1/SLC2A8/ZDHHC7/OSBPL8/ECHDC3/ADIPOQ/ZFP36L1/PIP4K2B/NDEL1/GNAI2/PKM/INHBB/TNS2/PTPN11/PPARG/KANK1/RAB13/GOT1/GKAP1/OGT/PRKDC/RAB8B/SP1/PIP4K2A/SNX5/PCK1/SMARCC1/SHC1/PDK4/SRSF5/PCK2/TBC1D4/L…
SC	GOBP_GLYCEROLIPID_BIOSYNTHETIC_PROCESS	244	0.341502	2.34493	0.0028169	0.00887008	GNPAT/THRSP/LPL/ACSL1/PISD/NR1H3/CAPN2/PTPMT1/DPM3/ANG/PI4KB/DGAT1/DGAT2/AGPAT2/INPP5K/PCYT1A/PEMT/CDIPT/GPAM/PNPLA2/ABHD4/GPAA1/FABP5/AGPAT1/PIGF/IP6K2/PIGC/CHKB/PIGZ/MTMR3/CTDNEP1/C3/DPM2/INPP1/PTEN/PIGU/PIP4K2B/ACSL3/PI4K2A/IP6K1/DPM1/DHRS7B/PCYT2/PIGV/FIG4/MTMR2/CRLS1/TMEM150A/PLSCR1/NR1H2/PIGK/PIGS/PTDSS1/PIP4K2A/ABHD5/PCK1/OCRL/CDS2/FBXW7/PCK2/SLC44A2/LPIN2/PIK3R1/CHPT1/PGAP2/VAC14/MBOAT7/U…
SC	GOBP_ATP_METABOLIC_PROCESS	244	0.575785	3.95363	0.0028169	0.00887008	VCP/NDUFAB1/COX4I1/UQCRH/GHITM/CHCHD2/COX6A1/DGUOK/NDUFA2/STOML2/NDUFB8/NDUFB7/NDUFS5/NUDT5/UQCRFS1/NDUFV2/COX5B/COX7A2L/PINK1/ISCU/HSPA8/NDUFS6/NDUFA8/ENO1/COX5A/EIF6/GPD1/NDUFB9/PGK1/NDUFV1/RHOA/SDHAF2/NDUFB4/NDUFA6/FIS1/ALDOA/PGM1/NDUFB6/TPI1/AK2/NDUFA10/NDUFC1/UQCRC1/NADK/COX7A2/DNAJC15/UQCR10/NUDT2/PFKFB1/TSPO/UQCRQ/PARK7/NDUFA12/NDUFB10/NDUFS2/BAD/NDUFA1/NDUFS4/NDUFC2/LDHA/UQCC2/NDUFA4/TMSB…
SC	GOBP_TELENCEPHALON_DEVELOPMENT	241	0.217475	1.49321	0.00282486	0.00887008	RTN4/ATP2B4/ATIC/NTRK2/RHOA/RAN/MKKS/NFIB/COL3A1/C12orf57/YWHAE/UQCRQ/XRN2/BAD/CRK/DPCD/HPRT1/UCHL5/TACC1/CXCL12/DIXDC1/SLIT3/PTEN/AQP1/MDK/EIF2B5/TSKU/NDEL1/LAMB1/ZDHHC16/CSF1R/EGFR/BNIP3/CDK5/BBS4/NSUN5/TMEM14B/ZMIZ1/EXT1/KDM1A/XRCC1/TRA2B/KAT2A/PLXNA4/PAFAH1B1/OGDH/SLC38A2/ARL13B/ID4/SUN1/AVPR2/ID2/BMP4/CRKL/RYK/BTG2/ALDH1A3/MBOAT7/CXCR4/HES1/CTNNB1/ATP1A2/BMP2/BLOC1S2/SKI/CASP3/CSNK2A2/SLIT2/…
SC	GOBP_ORGANIC_ACID_CATABOLIC_PROCESS	241	0.343544	2.35882	0.00282486	0.00887008	ACADVL/PGD/ATP2B4/HADHB/TST/FAH/HADHA/CDO1/HSD17B10/QDPR/MTHFS/DDAH2/ECH1/ACAA2/GLUD1/PHYH/ACADS/BCKDK/KYAT3/HACL1/LEP/ACAA1/DECR1/ECHS1/ADHFE1/ETFB/NUDT8/ALDH4A1/RIDA/GCSH/BCKDHA/CRAT/ACADM/DLD/ACOT8/GNPDA1/GLUL/ACAT2/MCAT/HIBCH/TWIST1/ADIPOQ/ACAD11/ETFA/ACAT1/BDH2/AASDHPPT/SCP2/ECI2/HADH/ILVBL/ECI1/ACOX2/AMDHD2/GOT1/LONP2/NUDT7/AIG1/ACOT4/LDHD/SHMT2/AKR1A1/HNMT/FAAH/SESN2/GCDH/PCK1/TYSND1/AUH/S…
SC	GOBP_MESENCHYMAL_CELL_DIFFERENTIATION	241	0.353847	2.42956	0.00282486	0.00887008	RTN4/RBPJ/PEF1/CORO1C/SDHAF2/DDX5/STAT1/GLIPR2/FERMT2/DDX17/PPP2CA/DAB2/EDNRB/HNRNPAB/TGFBR2/OTUD5/ADIPOR1/TRIM28/FGFR1/EFNB1/TGFBR3/SDCBP/SMAD3/ANXA6/SFRP1/SEMA3G/PTEN/TWIST1/MDK/CITED2/ENG/S100A4/KLHL12/PDCD6/EFNA1/NRP1/LOXL2/MCRIP1/WWTR1/EXT1/BAMBI/FLNA/SPRY1/SEMA3C/SIX1/SFRP2/FAM172A/ROCK1/FN1/TCF7L2/BCL2/MARK1/GSC/TGFBR1/RGCC/ADAM15/MAD2L2/COL1A1/PHLDB1/BMP4/OLFM1/PDCD4/SPRY2/EDNRA/MEF2C/ROC…
[truncated: 4,152 more rows]

## Sheet: Suppl. Table S3
Tissue	ID	Set size	Enrichment Score	Normalized enrichment score	p	Adj. p	Core enrichment
[truncated: 269 more rows]

## Sheet: Suppl. Table S4
	SC				SC females				SC males				VIS				VIS females				VIS males				SC pre OP				SC pre OP females				SC pre OP males				VIS pre OP				VIS pre OP females				VIS pre OP males				SC post OP
[truncated: 28 more rows]
[truncated: 23 more columns]

[truncated: 1 more sheets: Suppl. Table S5]
